# Supplementary material
Source: publisher figshare collection journal article supplement (https://acs.figshare.com/ndownloader/files/5851200)
Supplement: Supplementary file 1 [file 5851200]

data_cu_dm15841_0m
_audit_creation_date              2015-11-16
_audit_creation_method
;
Olex2 1.2
(compiled 2014.07.22 svn.r2960 for OlexSys, GUI svn.r4862)
;
_shelxl_version_number            2014-3
_publ_contact_author_address      ?
_publ_contact_author_email        ?
_publ_contact_author_name         ''
_publ_contact_author_phone        ?
_publ_section_references
;
Dolomanov, O.V., Bourhis, L.J., Gildea, R.J, Howard, J.A.K. & Puschmann, H.
 (2009), J. Appl. Cryst. 42, 339-341.

Sheldrick, G.M. (2008). Acta Cryst. A64, 112-122.
;
_chemical_name_common             ?
_chemical_name_systematic
;
 ?
;
_chemical_formula_moiety          'C33 H30 N4 O3'
_chemical_formula_sum             'C33 H30 N4 O3'
_chemical_formula_weight          530.61
_chemical_absolute_configuration  rmad
_chemical_melting_point           ?
loop_
  _atom_type_symbol
  _atom_type_description
  _atom_type_scat_dispersion_real
  _atom_type_scat_dispersion_imag
  _atom_type_scat_source
 'C' 'C' 0.0181 0.0091 'International Tables Vol C Tables 4.2.6.8 and 6.1.1.4'
 'H' 'H' 0.0000 0.0000 'International Tables Vol C Tables 4.2.6.8 and 6.1.1.4'
 'N' 'N' 0.0311 0.0180 'International Tables Vol C Tables 4.2.6.8 and 6.1.1.4'
 'O' 'O' 0.0492 0.0322 'International Tables Vol C Tables 4.2.6.8 and 6.1.1.4'

_shelx_space_group_comment
;
The symmetry employed for this shelxl refinement is uniquely defined
by the following loop, which should always be used as a source of
symmetry information in preference to the above space-group names.
They are only intended as comments.
;
_space_group_crystal_system       'monoclinic'
_space_group_IT_number            5
_space_group_name_H-M_alt         'C 1 2 1'
_space_group_name_Hall            'C 2y'
loop_
  _space_group_symop_operation_xyz
 'x, y, z'
 '-x, y, -z'
 'x+1/2, y+1/2, z'
 '-x+1/2, y+1/2, -z'

_cell_length_a                    32.0719(7)
_cell_length_b                    9.2396(2)
_cell_length_c                    20.2331(4)
_cell_angle_alpha                 90
_cell_angle_beta                  109.7790(10)
_cell_angle_gamma                 90
_cell_volume                      5642.0(2)
_cell_formula_units_Z             8
_cell_measurement_reflns_used     3494
_cell_measurement_temperature     296
_cell_measurement_theta_max       47.777
_cell_measurement_theta_min       2.929
_shelx_estimated_absorpt_T_max    0.968
_shelx_estimated_absorpt_T_min    0.839
_exptl_absorpt_coefficient_mu     0.651
_exptl_absorpt_correction_T_max   0.7532
_exptl_absorpt_correction_T_min   0.5863
_exptl_absorpt_correction_type    multi-scan
_exptl_absorpt_process_details
;
SADABS-2008/1 (Bruker,2008) was used for absorption correction.
wR2(int) was 0.1056 before and 0.0485 after correction.
The Ratio of minimum to maximum transmission is 0.7784.
The \l/2 correction factor is 0.0015.
;
_exptl_crystal_colour             colourless
_exptl_crystal_colour_primary     colourless
_exptl_crystal_density_diffrn     1.249
_exptl_crystal_density_meas       .
_exptl_crystal_density_method     ?
_exptl_crystal_description        'block'
_exptl_crystal_F_000              2240
_exptl_crystal_size_max           0.28
_exptl_crystal_size_mid           0.1
_exptl_crystal_size_min           0.05
_exptl_special_details
;
 ?
;
_exptl_transmission_factor_max    ?
_exptl_transmission_factor_min    ?
_diffrn_reflns_av_R_equivalents   0.0344
_diffrn_reflns_av_unetI/netI      0.0459
_diffrn_reflns_Laue_measured_fraction_full 0.970
_diffrn_reflns_Laue_measured_fraction_max 0.954
_diffrn_reflns_limit_h_max        36
_diffrn_reflns_limit_h_min        -38
_diffrn_reflns_limit_k_max        11
_diffrn_reflns_limit_k_min        -11
_diffrn_reflns_limit_l_max        24
_diffrn_reflns_limit_l_min        -24
_diffrn_reflns_number             21205
_diffrn_reflns_point_group_measured_fraction_full 0.847
_diffrn_reflns_point_group_measured_fraction_max 0.828
_diffrn_reflns_theta_full         67.679
_diffrn_reflns_theta_max          69.706
_diffrn_reflns_theta_min          2.320
_diffrn_ambient_temperature       296
_diffrn_detector_area_resol_mean  ?
_diffrn_measured_fraction_theta_full 0.970
_diffrn_measured_fraction_theta_max 0.954
_diffrn_measurement_device_type   'Bruker APEX-II CCD'
_diffrn_measurement_method        '\f and \w scans'
_diffrn_radiation_monochromator   'graphite'
_diffrn_radiation_type            CuK\a
_diffrn_radiation_wavelength      1.54178
_diffrn_source                    ?
_diffrn_standards_number          0
_reflns_Friedel_coverage          0.627
_reflns_Friedel_fraction_full     0.706
_reflns_Friedel_fraction_max      0.684
_reflns_number_gt                 6617
_reflns_number_total              8811
_reflns_special_details
;
 Reflections were merged by SHELXL according to the crystal
 class for the calculation of statistics and refinement.
 
 _reflns_Friedel_fraction is defined as the number of unique
 Friedel pairs measured divided by the number that would be
 possible theoretically, ignoring centric projections and
 systematic absences.
;
_reflns_threshold_expression      'I > 2\s(I)'
_computing_cell_refinement        'SAINT v7.68A (Bruker, 2009)'
_computing_data_collection        ?
_computing_data_reduction         'SAINT v7.68A (Bruker, 2009)'
_computing_molecular_graphics     'Olex2 (Dolomanov et al., 2009)'
_computing_publication_material   'Olex2 (Dolomanov et al., 2009)'
_computing_structure_refinement   'XL (Sheldrick, 2008)'
_computing_structure_solution     'ShelXS (Sheldrick, 2008)'
_refine_diff_density_max          0.281
_refine_diff_density_min          -0.229
_refine_diff_density_rms          0.067
_refine_ls_abs_structure_details
;
 Flack x determined using 1983 quotients [(I+)-(I-)]/[(I+)+(I-)]
 (Parsons, Flack and Wagner, Acta Cryst. B69 (2013) 249-259).
;
_refine_ls_abs_structure_Flack    -0.04(19)
_refine_ls_extinction_coef        0.00069(9)
_refine_ls_extinction_expression  'Fc^*^=kFc[1+0.001xFc^2^\l^3^/sin(2\q)]^-1/4^'
_refine_ls_extinction_method      SHELXL
_refine_ls_goodness_of_fit_ref    1.005
_refine_ls_hydrogen_treatment     constr
_refine_ls_matrix_type            full
_refine_ls_number_parameters      729
_refine_ls_number_reflns          8811
_refine_ls_number_restraints      1
_refine_ls_R_factor_all           0.0707
_refine_ls_R_factor_gt            0.0540
_refine_ls_restrained_S_all       1.005
_refine_ls_shift/su_max           0.000
_refine_ls_shift/su_mean          0.000
_refine_ls_structure_factor_coef  Fsqd
_refine_ls_weighting_details
'w=1/[\s^2^(Fo^2^)+(0.0905P)^2^] where P=(Fo^2^+2Fc^2^)/3'
_refine_ls_weighting_scheme       calc
_refine_ls_wR_factor_gt           0.1393
_refine_ls_wR_factor_ref          0.1557
_refine_special_details
;
 ?
;
_olex2_refinement_description
;
1. Fixed Uiso
 At 1.2 times of:
  All C(H) groups, All C(H,H) groups, All N(H,H) groups
 At 1.5 times of:
  All C(H,H,H) groups
2.a Rotating group:
 N3A(H3AA,H3AB)
2.b Secondary CH2 refined with riding coordinates:
 C9(H9A,H9B), C21(H21A,H21B), C23(H23A,H23B), C9A(H9AA,H9AB), C21A(H21C,H21D),
 C23A(H23C,H23D)
2.c Aromatic/amide H refined with riding coordinates:
 C4(H4), C5(H5), C6(H6), C7(H7), C11(H11), C12(H12), C13(H13), C14(H14),
 C15(H15), C28(H28), C29(H29), C31(H31), C32(H32), C4A(H4A), C5A(H5A), C6A(H6A),
  C7A(H7A), C11A(H11A), C12A(H12A), C13A(H13A), C14A(H14A), C15A(H15A),
 C28A(H28A), C29A(H29A), C31A(H31A), C32A(H32A)
2.d X=CH2 refined with riding coordinates:
 N3(H3A,H3B)
2.e Idealised Me refined as rotating group:
 C25(H25A,H25B,H25C), C26(H26A,H26B,H26C), C33(H33A,H33B,H33C), C25A(H25D,H25E,
 H25F), C26A(H26D,H26E,H26F), C33A(H33D,H33E,H33F)
;
_atom_sites_solution_hydrogens    mixed
_atom_sites_solution_primary      direct
_atom_sites_solution_secondary    ?
loop_
  _atom_site_label
  _atom_site_type_symbol
  _atom_site_fract_x
  _atom_site_fract_y
  _atom_site_fract_z
  _atom_site_U_iso_or_equiv
  _atom_site_adp_type
  _atom_site_occupancy
  _atom_site_site_symmetry_order
  _atom_site_calc_flag
  _atom_site_refinement_flags_posn
  _atom_site_refinement_flags_adp
  _atom_site_refinement_flags_occupancy
  _atom_site_disorder_assembly
  _atom_site_disorder_group
 O1 O -0.92713(12) -0.4971(4) -0.35847(18) 0.0866(10) Uani 1 1 d . . . . .
 O2 O -0.97422(10) -0.2110(4) -0.31511(15) 0.0779(9) Uani 1 1 d . . . . .
 O3 O -0.75493(15) -0.4705(5) 0.15015(17) 0.1070(13) Uani 1 1 d . . . . .
 N1 N -0.91441(11) -0.2809(5) -0.40403(17) 0.0657(9) Uani 1 1 d . . . . .
 N2 N -0.84955(11) -0.3925(5) -0.13415(16) 0.0639(9) Uani 1 1 d . . . . .
 N3 N -0.78635(13) -0.4815(6) -0.1511(2) 0.0905(15) Uani 1 1 d . . . . .
 H3A H -0.7705 -0.5003 -0.1768 0.109 Uiso 1 1 calc R . . . .
 H3B H -0.7769 -0.5041 -0.1072 0.109 Uiso 1 1 calc R . . . .
 N4 N -0.79869(14) -0.4309(9) -0.3282(2) 0.127(3) Uani 1 1 d . . . . .
 C1 C -0.91300(13) -0.3749(6) -0.3512(2) 0.0650(10) Uani 1 1 d . . . . .
 C2 C -0.88717(13) -0.3002(5) -0.2800(2) 0.0586(9) Uani 1 1 d . . . . .
 C3 C -0.88152(14) -0.1491(5) -0.3051(2) 0.0633(10) Uani 1 1 d . . . . .
 C4 C -0.8644(2) -0.0266(7) -0.2682(3) 0.0870(15) Uani 1 1 d . . . . .
 H4 H -0.8526 -0.0296 -0.2194 0.104 Uiso 1 1 calc R . . . .
 C5 C -0.8645(3) 0.1024(8) -0.3034(4) 0.113(2) Uani 1 1 d . . . . .
 H5 H -0.8526 0.1861 -0.2787 0.136 Uiso 1 1 calc R . . . .
 C6 C -0.8826(2) 0.1043(8) -0.3760(4) 0.112(2) Uani 1 1 d . . . . .
 H6 H -0.8832 0.1912 -0.3995 0.134 Uiso 1 1 calc R . . . .
 C7 C -0.89975(19) -0.0167(7) -0.4143(3) 0.0864(14) Uani 1 1 d . . . . .
 H7 H -0.9117 -0.0135 -0.4631 0.104 Uiso 1 1 calc R . . . .
 C8 C -0.89876(15) -0.1443(6) -0.3781(2) 0.0661(11) Uani 1 1 d . . . . .
 C9 C -0.93692(15) -0.3130(7) -0.4785(2) 0.0848(16) Uani 1 1 d . . . . .
 H9A H -0.9603 -0.2424 -0.4978 0.102 Uiso 1 1 calc R . . . .
 H9B H -0.9507 -0.4076 -0.4826 0.102 Uiso 1 1 calc R . . . .
 C10 C -0.90630(14) -0.3116(5) -0.5219(2) 0.0661(10) Uani 1 1 d . . . . .
 C11 C -0.92209(17) -0.2602(6) -0.5905(2) 0.0749(12) Uani 1 1 d . . . . .
 H11 H -0.9503 -0.2200 -0.6083 0.090 Uiso 1 1 calc R . . . .
 C12 C -0.89568(19) -0.2690(6) -0.6324(2) 0.0849(15) Uani 1 1 d . . . . .
 H12 H -0.9065 -0.2352 -0.6783 0.102 Uiso 1 1 calc R . . . .
 C13 C -0.85429(18) -0.3262(6) -0.6072(3) 0.0814(14) Uani 1 1 d . . . . .
 H13 H -0.8371 -0.3332 -0.6360 0.098 Uiso 1 1 calc R . . . .
 C14 C -0.83820(17) -0.3734(6) -0.5392(3) 0.0772(12) Uani 1 1 d . . . . .
 H14 H -0.8095 -0.4094 -0.5213 0.093 Uiso 1 1 calc R . . . .
 C15 C -0.86426(15) -0.3682(6) -0.4967(2) 0.0715(11) Uani 1 1 d . . . . .
 H15 H -0.8532 -0.4032 -0.4510 0.086 Uiso 1 1 calc R . . . .
 C16 C -0.82599(13) -0.4169(6) -0.1794(2) 0.0680(11) Uani 1 1 d . . . . .
 C17 C -0.84342(13) -0.3776(6) -0.2479(2) 0.0680(11) Uani 1 1 d . . . . .
 C18 C -0.81830(15) -0.4089(8) -0.2919(2) 0.0877(17) Uani 1 1 d . . . . .
 C19 C -0.91155(13) -0.3002(5) -0.22824(19) 0.0586(9) Uani 1 1 d . . . . .
 C20 C -0.95679(13) -0.2460(5) -0.2533(2) 0.0616(10) Uani 1 1 d . . . . .
 C21 C -0.98087(14) -0.2257(6) -0.2019(2) 0.0702(11) Uani 1 1 d . . . . .
 H21A H -1.0124 -0.2376 -0.2265 0.084 Uiso 1 1 calc R . . . .
 H21B H -0.9761 -0.1274 -0.1841 0.084 Uiso 1 1 calc R . . . .
 C22 C -0.96677(13) -0.3295(5) -0.1401(2) 0.0644(10) Uani 1 1 d . . . . .
 C23 C -0.91648(13) -0.3242(6) -0.1073(2) 0.0644(10) Uani 1 1 d . . . . .
 H23A H -0.9080 -0.2332 -0.0824 0.077 Uiso 1 1 calc R . . . .
 H23B H -0.9068 -0.4017 -0.0731 0.077 Uiso 1 1 calc R . . . .
 C24 C -0.89269(12) -0.3384(5) -0.16013(19) 0.0573(9) Uani 1 1 d . . . . .
 C25 C -0.98176(19) -0.4829(7) -0.1646(3) 0.0908(16) Uani 1 1 d . . . . .
 H25A H -0.9690 -0.5123 -0.1990 0.136 Uiso 1 1 calc GR . . . .
 H25B H -1.0135 -0.4854 -0.1849 0.136 Uiso 1 1 calc GR . . . .
 H25C H -0.9723 -0.5476 -0.1252 0.136 Uiso 1 1 calc GR . . . .
 C26 C -0.98702(15) -0.2821(7) -0.0854(2) 0.0831(15) Uani 1 1 d . . . . .
 H26A H -0.9775 -0.3464 -0.0458 0.125 Uiso 1 1 calc GR . . . .
 H26B H -1.0187 -0.2847 -0.1056 0.125 Uiso 1 1 calc GR . . . .
 H26C H -0.9776 -0.1853 -0.0702 0.125 Uiso 1 1 calc GR . . . .
 C27 C -0.82689(13) -0.4150(5) -0.0595(2) 0.0585(9) Uani 1 1 d . . . . .
 C28 C -0.80033(18) -0.3073(6) -0.0201(3) 0.0846(14) Uani 1 1 d . . . . .
 H28 H -0.7981 -0.2192 -0.0409 0.102 Uiso 1 1 calc R . . . .
 C29 C -0.7770(2) -0.3297(7) 0.0501(3) 0.0959(17) Uani 1 1 d . . . . .
 H29 H -0.7591 -0.2565 0.0766 0.115 Uiso 1 1 calc R . . . .
 C30 C -0.78011(16) -0.4594(6) 0.0811(2) 0.0731(12) Uani 1 1 d . . . . .
 C31 C -0.80584(16) -0.5669(6) 0.0423(2) 0.0728(12) Uani 1 1 d . . . . .
 H31 H -0.8076 -0.6557 0.0628 0.087 Uiso 1 1 calc R . . . .
 C32 C -0.82937(15) -0.5431(6) -0.0279(2) 0.0714(11) Uani 1 1 d . . . . .
 H32 H -0.8473 -0.6163 -0.0542 0.086 Uiso 1 1 calc R . . . .
 C33 C -0.7593(2) -0.5998(8) 0.1856(3) 0.110(2) Uani 1 1 d . . . . .
 H33A H -0.7515 -0.6816 0.1629 0.165 Uiso 1 1 calc GR . . . .
 H33B H -0.7894 -0.6097 0.1841 0.165 Uiso 1 1 calc GR . . . .
 H33C H -0.7400 -0.5954 0.2336 0.165 Uiso 1 1 calc GR . . . .
 O1A O -0.58790(12) -0.5819(4) -0.17207(18) 0.0829(9) Uani 1 1 d . . . . .
 O2A O -0.52114(9) -0.3442(4) -0.18877(14) 0.0737(9) Uani 1 1 d . . . . .
 O3A O -0.74928(14) -0.4022(5) -0.67057(15) 0.1019(13) Uani 1 1 d . . . . .
 N1A N -0.58641(11) -0.3741(5) -0.10912(16) 0.0634(9) Uani 1 1 d . . . . .
 N2A N -0.65342(11) -0.3670(4) -0.38461(15) 0.0582(8) Uani 1 1 d . . . . .
 N3A N -0.72298(12) -0.4115(5) -0.37630(18) 0.0804(12) Uani 1 1 d . . . . .
 H3AA H -0.7266 -0.4722 -0.4105 0.096 Uiso 1 1 d GR . . . .
 H3AB H -0.7355 -0.4469 -0.3480 0.096 Uiso 1 1 d GR . . . .
 N4A N -0.70826(13) -0.4594(6) -0.19758(19) 0.0877(14) Uani 1 1 d . . . . .
 C1A C -0.59330(13) -0.4530(5) -0.1695(2) 0.0614(10) Uani 1 1 d . . . . .
 C2A C -0.61274(12) -0.3490(4) -0.23216(18) 0.0524(8) Uani 1 1 d . . . . .
 C3A C -0.60934(12) -0.2047(5) -0.19571(19) 0.0543(8) Uani 1 1 d . . . . .
 C4A C -0.61961(15) -0.0681(5) -0.2225(2) 0.0656(10) Uani 1 1 d . . . . .
 H4A H -0.6301 -0.0532 -0.2708 0.079 Uiso 1 1 calc R . . . .
 C5A C -0.61418(17) 0.0484(6) -0.1765(3) 0.0794(13) Uani 1 1 d . . . . .
 H5A H -0.6207 0.1420 -0.1939 0.095 Uiso 1 1 calc R . . . .
 C6A C -0.59903(19) 0.0238(7) -0.1048(3) 0.0895(16) Uani 1 1 d . . . . .
 H6A H -0.5957 0.1019 -0.0744 0.107 Uiso 1 1 calc R . . . .
 C7A C -0.58888(17) -0.1118(7) -0.0774(3) 0.0794(14) Uani 1 1 d . . . . .
 H7A H -0.5785 -0.1268 -0.0291 0.095 Uiso 1 1 calc R . . . .
 C8A C -0.59448(13) -0.2265(5) -0.1235(2) 0.0626(10) Uani 1 1 d . . . . .
 C9A C -0.56686(16) -0.4336(8) -0.0388(2) 0.0881(16) Uani 1 1 d . . . . .
 H9AA H -0.5397 -0.3815 -0.0146 0.106 Uiso 1 1 calc R . . . .
 H9AB H -0.5591 -0.5340 -0.0425 0.106 Uiso 1 1 calc R . . . .
 C10A C -0.59689(15) -0.4256(6) 0.0046(2) 0.0700(11) Uani 1 1 d . . . . .
 C11A C -0.57956(17) -0.3918(7) 0.0751(2) 0.0815(14) Uani 1 1 d . . . . .
 H11A H -0.5494 -0.3729 0.0957 0.098 Uiso 1 1 calc R . . . .
 C12A C -0.6071(2) -0.3859(7) 0.1151(2) 0.0902(16) Uani 1 1 d . . . . .
 H12A H -0.5950 -0.3650 0.1628 0.108 Uiso 1 1 calc R . . . .
 C13A C -0.65083(19) -0.4098(7) 0.0863(3) 0.0892(16) Uani 1 1 d . . . . .
 H13A H -0.6689 -0.4048 0.1137 0.107 Uiso 1 1 calc R . . . .
 C14A C -0.66872(17) -0.4419(7) 0.0159(3) 0.0887(16) Uani 1 1 d . . . . .
 H14A H -0.6990 -0.4572 -0.0046 0.106 Uiso 1 1 calc R . . . .
 C15A C -0.64164(16) -0.4514(6) -0.0242(2) 0.0797(13) Uani 1 1 d . . . . .
 H15A H -0.6538 -0.4755 -0.0715 0.096 Uiso 1 1 calc R . . . .
 C16A C -0.67910(13) -0.3908(5) -0.34245(19) 0.0590(9) Uani 1 1 d . . . . .
 C17A C -0.66013(12) -0.3929(5) -0.27091(19) 0.0563(9) Uani 1 1 d . . . . .
 C18A C -0.68723(13) -0.4284(6) -0.2311(2) 0.0671(11) Uani 1 1 d . . . . .
 C19A C -0.58736(12) -0.3538(4) -0.28302(18) 0.0523(8) Uani 1 1 d . . . . .
 C20A C -0.53958(13) -0.3486(5) -0.2531(2) 0.0593(9) Uani 1 1 d . . . . .
 C21A C -0.51231(14) -0.3507(6) -0.3007(2) 0.0702(11) Uani 1 1 d . . . . .
 H21C H -0.5052 -0.4502 -0.3079 0.084 Uiso 1 1 calc R . . . .
 H21D H -0.4847 -0.2999 -0.2780 0.084 Uiso 1 1 calc R . . . .
 C22A C -0.53624(14) -0.2805(5) -0.3721(2) 0.0660(11) Uani 1 1 d . . . . .
 C23A C -0.58165(14) -0.3500(5) -0.4031(2) 0.0669(11) Uani 1 1 d . . . . .
 H23C H -0.5986 -0.2961 -0.4446 0.080 Uiso 1 1 calc R . . . .
 H23D H -0.5779 -0.4476 -0.4179 0.080 Uiso 1 1 calc R . . . .
 C24A C -0.60771(12) -0.3569(4) -0.35398(18) 0.0529(8) Uani 1 1 d . . . . .
 C25A C -0.54048(18) -0.1186(6) -0.3631(3) 0.0858(14) Uani 1 1 d . . . . .
 H25D H -0.5566 -0.0759 -0.4077 0.129 Uiso 1 1 calc GR . . . .
 H25E H -0.5115 -0.0761 -0.3451 0.129 Uiso 1 1 calc GR . . . .
 H25F H -0.5560 -0.1013 -0.3308 0.129 Uiso 1 1 calc GR . . . .
 C26A C -0.50971(18) -0.3060(9) -0.4211(3) 0.102(2) Uani 1 1 d . . . . .
 H26D H -0.5037 -0.4075 -0.4227 0.153 Uiso 1 1 calc GR . . . .
 H26E H -0.4822 -0.2538 -0.4041 0.153 Uiso 1 1 calc GR . . . .
 H26F H -0.5265 -0.2726 -0.4675 0.153 Uiso 1 1 calc GR . . . .
 C27A C -0.67554(13) -0.3727(5) -0.46009(19) 0.0584(9) Uani 1 1 d . . . . .
 C28A C -0.68252(17) -0.5025(5) -0.4949(2) 0.0733(12) Uani 1 1 d . . . . .
 H28A H -0.6705 -0.5870 -0.4710 0.088 Uiso 1 1 calc R . . . .
 C29A C -0.70749(19) -0.5080(6) -0.5655(2) 0.0845(14) Uani 1 1 d . . . . .
 H29A H -0.7125 -0.5965 -0.5887 0.101 Uiso 1 1 calc R . . . .
 C30A C -0.72488(17) -0.3847(6) -0.6014(2) 0.0751(12) Uani 1 1 d . . . . .
 C31A C -0.7168(2) -0.2552(6) -0.5671(2) 0.0942(18) Uani 1 1 d . . . . .
 H31A H -0.7277 -0.1703 -0.5915 0.113 Uiso 1 1 calc R . . . .
 C32A C -0.6926(2) -0.2493(5) -0.4964(2) 0.0861(15) Uani 1 1 d . . . . .
 H32A H -0.6879 -0.1607 -0.4733 0.103 Uiso 1 1 calc R . . . .
 C33A C -0.7646(2) -0.2736(9) -0.7117(3) 0.114(2) Uani 1 1 d . . . . .
 H33D H -0.7817 -0.3002 -0.7590 0.170 Uiso 1 1 calc GR . . . .
 H33E H -0.7396 -0.2166 -0.7119 0.170 Uiso 1 1 calc GR . . . .
 H33F H -0.7827 -0.2182 -0.6917 0.170 Uiso 1 1 calc GR . . . .

loop_
  _atom_site_aniso_label
  _atom_site_aniso_U_11
  _atom_site_aniso_U_22
  _atom_site_aniso_U_33
  _atom_site_aniso_U_23
  _atom_site_aniso_U_13
  _atom_site_aniso_U_12
 O1 0.091(2) 0.084(2) 0.086(2) -0.0139(19) 0.0309(19) -0.0228(19)
 O2 0.0602(17) 0.111(3) 0.0596(16) 0.0127(17) 0.0170(14) 0.0161(17)
 O3 0.125(3) 0.118(3) 0.0575(17) 0.006(2) 0.004(2) 0.000(3)
 N1 0.062(2) 0.086(3) 0.0490(17) 0.0001(17) 0.0190(16) -0.0016(18)
 N2 0.0543(18) 0.087(3) 0.0508(15) 0.0069(17) 0.0189(15) 0.0091(17)
 N3 0.064(2) 0.145(4) 0.066(2) 0.022(3) 0.0265(19) 0.037(3)
 N4 0.066(3) 0.256(8) 0.062(2) 0.013(3) 0.025(2) 0.050(4)
 C1 0.056(2) 0.080(3) 0.060(2) -0.008(2) 0.0212(19) -0.002(2)
 C2 0.052(2) 0.074(3) 0.0515(19) -0.0018(18) 0.0199(17) -0.0024(18)
 C3 0.062(2) 0.079(3) 0.055(2) -0.004(2) 0.027(2) 0.002(2)
 C4 0.105(4) 0.090(4) 0.078(3) -0.018(3) 0.047(3) -0.019(3)
 C5 0.161(6) 0.082(4) 0.123(5) -0.020(4) 0.083(5) -0.027(4)
 C6 0.154(6) 0.088(4) 0.123(5) 0.018(4) 0.087(5) 0.003(4)
 C7 0.106(4) 0.089(4) 0.074(3) 0.012(3) 0.043(3) 0.010(3)
 C8 0.066(3) 0.080(3) 0.058(2) 0.003(2) 0.028(2) 0.003(2)
 C9 0.063(3) 0.133(5) 0.050(2) -0.013(3) 0.008(2) -0.009(3)
 C10 0.066(3) 0.078(3) 0.0485(19) -0.0088(19) 0.0126(19) -0.001(2)
 C11 0.074(3) 0.086(3) 0.054(2) -0.007(2) 0.008(2) 0.002(2)
 C12 0.105(4) 0.095(4) 0.053(2) -0.007(2) 0.025(3) -0.018(3)
 C13 0.092(4) 0.084(3) 0.075(3) -0.021(3) 0.037(3) -0.015(3)
 C14 0.075(3) 0.068(3) 0.088(3) -0.010(3) 0.027(3) 0.005(2)
 C15 0.074(3) 0.076(3) 0.061(2) -0.002(2) 0.019(2) 0.002(2)
 C16 0.058(2) 0.089(3) 0.060(2) 0.007(2) 0.0232(19) 0.009(2)
 C17 0.057(2) 0.094(3) 0.055(2) 0.002(2) 0.0227(19) 0.007(2)
 C18 0.057(3) 0.149(5) 0.055(2) 0.008(3) 0.016(2) 0.022(3)
 C19 0.054(2) 0.072(2) 0.0499(19) 0.0015(18) 0.0178(17) 0.0026(18)
 C20 0.053(2) 0.074(3) 0.057(2) 0.0046(19) 0.0161(19) 0.0035(18)
 C21 0.055(2) 0.088(3) 0.067(2) 0.005(2) 0.021(2) 0.010(2)
 C22 0.058(2) 0.080(3) 0.062(2) -0.002(2) 0.0280(19) 0.002(2)
 C23 0.059(2) 0.083(3) 0.055(2) 0.003(2) 0.0237(19) 0.005(2)
 C24 0.050(2) 0.070(3) 0.0527(19) 0.0000(18) 0.0192(17) 0.0024(17)
 C25 0.094(4) 0.088(4) 0.096(4) -0.011(3) 0.040(3) -0.022(3)
 C26 0.066(3) 0.119(4) 0.073(3) 0.000(3) 0.035(2) 0.012(3)
 C27 0.050(2) 0.070(3) 0.055(2) 0.0041(18) 0.0170(17) 0.0043(17)
 C28 0.105(4) 0.067(3) 0.072(3) 0.008(2) 0.017(3) -0.010(3)
 C29 0.116(4) 0.085(4) 0.068(3) 0.000(3) 0.007(3) -0.019(3)
 C30 0.074(3) 0.087(3) 0.052(2) 0.005(2) 0.014(2) 0.005(2)
 C31 0.077(3) 0.075(3) 0.067(2) 0.014(2) 0.025(2) 0.000(2)
 C32 0.064(3) 0.077(3) 0.067(2) 0.005(2) 0.015(2) -0.006(2)
 C33 0.132(5) 0.126(6) 0.064(3) 0.027(3) 0.023(3) 0.036(4)
 O1A 0.094(2) 0.066(2) 0.090(2) 0.0179(17) 0.032(2) 0.0151(17)
 O2A 0.0550(16) 0.101(3) 0.0602(16) 0.0059(16) 0.0133(14) 0.0050(15)
 O3A 0.129(3) 0.106(3) 0.0492(15) -0.0022(18) 0.0012(18) 0.004(3)
 N1A 0.0590(19) 0.084(2) 0.0455(15) 0.0150(16) 0.0149(14) 0.0062(17)
 N2A 0.0612(19) 0.068(2) 0.0443(14) -0.0012(15) 0.0168(14) -0.0059(15)
 N3A 0.062(2) 0.121(4) 0.0547(18) -0.008(2) 0.0159(17) -0.017(2)
 N4A 0.061(2) 0.145(4) 0.057(2) 0.001(2) 0.0206(18) -0.013(2)
 C1A 0.058(2) 0.069(3) 0.057(2) 0.0108(19) 0.0210(19) 0.0041(19)
 C2A 0.052(2) 0.056(2) 0.0480(17) 0.0033(16) 0.0165(16) 0.0023(16)
 C3A 0.051(2) 0.064(2) 0.0496(19) -0.0006(17) 0.0193(17) 0.0012(16)
 C4A 0.068(3) 0.065(3) 0.064(2) 0.003(2) 0.023(2) 0.002(2)
 C5A 0.083(3) 0.063(3) 0.100(4) -0.006(2) 0.042(3) -0.001(2)
 C6A 0.101(4) 0.085(4) 0.092(3) -0.035(3) 0.045(3) -0.022(3)
 C7A 0.081(3) 0.099(4) 0.061(2) -0.017(2) 0.028(2) -0.012(3)
 C8A 0.057(2) 0.082(3) 0.051(2) -0.004(2) 0.0214(19) -0.006(2)
 C9A 0.072(3) 0.131(5) 0.058(2) 0.029(3) 0.017(2) 0.017(3)
 C10A 0.068(3) 0.083(3) 0.051(2) 0.021(2) 0.010(2) 0.000(2)
 C11A 0.076(3) 0.105(4) 0.051(2) 0.020(2) 0.005(2) -0.009(3)
 C12A 0.108(4) 0.104(4) 0.052(2) 0.016(3) 0.018(3) 0.003(3)
 C13A 0.096(4) 0.109(5) 0.067(3) 0.028(3) 0.033(3) 0.006(3)
 C14A 0.073(3) 0.111(4) 0.079(3) 0.027(3) 0.021(3) -0.011(3)
 C15A 0.078(3) 0.101(4) 0.053(2) 0.016(2) 0.013(2) -0.012(3)
 C16A 0.056(2) 0.065(2) 0.0546(19) -0.0069(18) 0.0170(17) -0.0065(18)
 C17A 0.053(2) 0.068(2) 0.0481(17) -0.0022(17) 0.0166(16) -0.0029(17)
 C18A 0.054(2) 0.092(3) 0.051(2) -0.009(2) 0.0121(19) -0.009(2)
 C19A 0.055(2) 0.054(2) 0.0467(17) 0.0017(16) 0.0148(16) 0.0033(16)
 C20A 0.061(2) 0.063(2) 0.0547(19) 0.0028(17) 0.0204(18) 0.0041(18)
 C21A 0.057(2) 0.086(3) 0.070(2) 0.002(2) 0.024(2) 0.010(2)
 C22A 0.063(2) 0.083(3) 0.056(2) -0.002(2) 0.026(2) -0.004(2)
 C23A 0.074(3) 0.078(3) 0.052(2) -0.009(2) 0.025(2) -0.004(2)
 C24A 0.058(2) 0.052(2) 0.0501(18) -0.0033(16) 0.0205(17) -0.0007(16)
 C25A 0.091(4) 0.086(4) 0.082(3) 0.007(3) 0.031(3) -0.013(3)
 C26A 0.086(3) 0.153(6) 0.081(3) -0.016(4) 0.048(3) -0.016(4)
 C27A 0.062(2) 0.061(2) 0.0498(18) -0.0012(18) 0.0162(17) -0.0034(18)
 C28A 0.090(3) 0.061(3) 0.059(2) 0.002(2) 0.012(2) 0.008(2)
 C29A 0.110(4) 0.069(3) 0.059(2) -0.014(2) 0.007(3) 0.005(3)
 C30A 0.085(3) 0.084(3) 0.0474(19) 0.000(2) 0.010(2) -0.001(2)
 C31A 0.133(5) 0.068(3) 0.059(3) 0.010(2) 0.003(3) 0.013(3)
 C32A 0.124(4) 0.056(3) 0.062(3) -0.005(2) 0.011(3) 0.004(3)
 C33A 0.124(5) 0.138(6) 0.061(3) 0.018(3) 0.009(3) 0.008(5)

_geom_special_details
;
 All esds (except the esd in the dihedral angle between two l.s. planes)
 are estimated using the full covariance matrix.  The cell esds are taken
 into account individually in the estimation of esds in distances, angles
 and torsion angles; correlations between esds in cell parameters are only
 used when they are defined by crystal symmetry.  An approximate (isotropic)
 treatment of cell esds is used for estimating esds involving l.s. planes.
;
loop_
  _geom_bond_atom_site_label_1
  _geom_bond_atom_site_label_2
  _geom_bond_distance
  _geom_bond_site_symmetry_2
  _geom_bond_publ_flag
 O1 C1 1.206(6) . ?
 O2 C20 1.228(5) . ?
 O3 C30 1.361(5) . ?
 O3 C33 1.425(8) . ?
 N1 C1 1.367(6) . ?
 N1 C8 1.393(7) . ?
 N1 C9 1.464(5) . ?
 N2 C16 1.388(5) . ?
 N2 C24 1.396(5) . ?
 N2 C27 1.452(5) . ?
 N3 H3A 0.8600 . ?
 N3 H3B 0.8600 . ?
 N3 C16 1.345(5) . ?
 N4 C18 1.136(6) . ?
 C1 C2 1.558(6) . ?
 C2 C3 1.517(7) . ?
 C2 C17 1.512(6) . ?
 C2 C19 1.505(5) . ?
 C3 C4 1.365(7) . ?
 C3 C8 1.392(6) . ?
 C4 H4 0.9300 . ?
 C4 C5 1.389(9) . ?
 C5 H5 0.9300 . ?
 C5 C6 1.384(9) . ?
 C6 H6 0.9300 . ?
 C6 C7 1.366(9) . ?
 C7 H7 0.9300 . ?
 C7 C8 1.382(7) . ?
 C9 H9A 0.9700 . ?
 C9 H9B 0.9700 . ?
 C9 C10 1.523(6) . ?
 C10 C11 1.390(6) . ?
 C10 C15 1.374(6) . ?
 C11 H11 0.9300 . ?
 C11 C12 1.388(7) . ?
 C12 H12 0.9300 . ?
 C12 C13 1.358(8) . ?
 C13 H13 0.9300 . ?
 C13 C14 1.367(7) . ?
 C14 H14 0.9300 . ?
 C14 C15 1.389(6) . ?
 C15 H15 0.9300 . ?
 C16 C17 1.357(5) . ?
 C17 C18 1.418(6) . ?
 C19 C20 1.454(5) . ?
 C19 C24 1.351(5) . ?
 C20 C21 1.503(5) . ?
 C21 H21A 0.9700 . ?
 C21 H21B 0.9700 . ?
 C21 C22 1.517(6) . ?
 C22 C23 1.523(6) . ?
 C22 C25 1.524(7) . ?
 C22 C26 1.526(6) . ?
 C23 H23A 0.9700 . ?
 C23 H23B 0.9700 . ?
 C23 C24 1.515(5) . ?
 C25 H25A 0.9600 . ?
 C25 H25B 0.9600 . ?
 C25 H25C 0.9600 . ?
 C26 H26A 0.9600 . ?
 C26 H26B 0.9600 . ?
 C26 H26C 0.9600 . ?
 C27 C28 1.376(7) . ?
 C27 C32 1.359(6) . ?
 C28 H28 0.9300 . ?
 C28 C29 1.379(7) . ?
 C29 H29 0.9300 . ?
 C29 C30 1.371(8) . ?
 C30 C31 1.358(7) . ?
 C31 H31 0.9300 . ?
 C31 C32 1.383(6) . ?
 C32 H32 0.9300 . ?
 C33 H33A 0.9600 . ?
 C33 H33B 0.9600 . ?
 C33 H33C 0.9600 . ?
 O1A C1A 1.208(6) . ?
 O2A C20A 1.234(4) . ?
 O3A C30A 1.362(5) . ?
 O3A C33A 1.439(8) . ?
 N1A C1A 1.374(6) . ?
 N1A C8A 1.401(6) . ?
 N1A C9A 1.454(5) . ?
 N2A C16A 1.389(5) . ?
 N2A C24A 1.388(5) . ?
 N2A C27A 1.451(4) . ?
 N3A H3AA 0.8668 . ?
 N3A H3AB 0.8678 . ?
 N3A C16A 1.354(5) . ?
 N4A C18A 1.143(5) . ?
 C1A C2A 1.544(5) . ?
 C2A C3A 1.510(6) . ?
 C2A C17A 1.511(5) . ?
 C2A C19A 1.513(5) . ?
 C3A C4A 1.369(6) . ?
 C3A C8A 1.389(5) . ?
 C4A H4A 0.9300 . ?
 C4A C5A 1.395(7) . ?
 C5A H5A 0.9300 . ?
 C5A C6A 1.384(7) . ?
 C6A H6A 0.9300 . ?
 C6A C7A 1.365(9) . ?
 C7A H7A 0.9300 . ?
 C7A C8A 1.382(7) . ?
 C9A H9AA 0.9700 . ?
 C9A H9AB 0.9700 . ?
 C9A C10A 1.510(6) . ?
 C10A C11A 1.379(6) . ?
 C10A C15A 1.375(7) . ?
 C11A H11A 0.9300 . ?
 C11A C12A 1.387(7) . ?
 C12A H12A 0.9300 . ?
 C12A C13A 1.343(7) . ?
 C13A H13A 0.9300 . ?
 C13A C14A 1.375(7) . ?
 C14A H14A 0.9300 . ?
 C14A C15A 1.377(7) . ?
 C15A H15A 0.9300 . ?
 C16A C17A 1.367(5) . ?
 C17A C18A 1.410(5) . ?
 C19A C20A 1.445(5) . ?
 C19A C24A 1.362(5) . ?
 C20A C21A 1.505(5) . ?
 C21A H21C 0.9700 . ?
 C21A H21D 0.9700 . ?
 C21A C22A 1.531(6) . ?
 C22A C23A 1.519(6) . ?
 C22A C25A 1.519(8) . ?
 C22A C26A 1.529(6) . ?
 C23A H23C 0.9700 . ?
 C23A H23D 0.9700 . ?
 C23A C24A 1.501(5) . ?
 C25A H25D 0.9600 . ?
 C25A H25E 0.9600 . ?
 C25A H25F 0.9600 . ?
 C26A H26D 0.9600 . ?
 C26A H26E 0.9600 . ?
 C26A H26F 0.9600 . ?
 C27A C28A 1.370(6) . ?
 C27A C32A 1.367(6) . ?
 C28A H28A 0.9300 . ?
 C28A C29A 1.382(6) . ?
 C29A H29A 0.9300 . ?
 C29A C30A 1.365(7) . ?
 C30A C31A 1.364(8) . ?
 C31A H31A 0.9300 . ?
 C31A C32A 1.377(6) . ?
 C32A H32A 0.9300 . ?
 C33A H33D 0.9600 . ?
 C33A H33E 0.9600 . ?
 C33A H33F 0.9600 . ?

loop_
  _geom_angle_atom_site_label_1
  _geom_angle_atom_site_label_2
  _geom_angle_atom_site_label_3
  _geom_angle
  _geom_angle_site_symmetry_1
  _geom_angle_site_symmetry_3
  _geom_angle_publ_flag
 C30 O3 C33 117.0(5) . . ?
 C1 N1 C8 111.7(3) . . ?
 C1 N1 C9 123.4(4) . . ?
 C8 N1 C9 124.1(4) . . ?
 C16 N2 C24 120.1(3) . . ?
 C16 N2 C27 118.0(3) . . ?
 C24 N2 C27 121.8(3) . . ?
 H3A N3 H3B 120.0 . . ?
 C16 N3 H3A 120.0 . . ?
 C16 N3 H3B 120.0 . . ?
 O1 C1 N1 125.9(4) . . ?
 O1 C1 C2 126.0(4) . . ?
 N1 C1 C2 107.9(4) . . ?
 C3 C2 C1 100.7(3) . . ?
 C17 C2 C1 108.3(4) . . ?
 C17 C2 C3 112.4(4) . . ?
 C19 C2 C1 113.8(3) . . ?
 C19 C2 C3 112.4(3) . . ?
 C19 C2 C17 109.0(3) . . ?
 C4 C3 C2 130.7(4) . . ?
 C4 C3 C8 119.8(5) . . ?
 C8 C3 C2 109.5(4) . . ?
 C3 C4 H4 120.0 . . ?
 C3 C4 C5 120.0(5) . . ?
 C5 C4 H4 120.0 . . ?
 C4 C5 H5 120.6 . . ?
 C6 C5 C4 118.9(6) . . ?
 C6 C5 H5 120.6 . . ?
 C5 C6 H6 118.8 . . ?
 C7 C6 C5 122.3(6) . . ?
 C7 C6 H6 118.8 . . ?
 C6 C7 H7 121.1 . . ?
 C6 C7 C8 117.7(5) . . ?
 C8 C7 H7 121.1 . . ?
 C3 C8 N1 109.5(4) . . ?
 C7 C8 N1 129.2(4) . . ?
 C7 C8 C3 121.3(5) . . ?
 N1 C9 H9A 108.8 . . ?
 N1 C9 H9B 108.8 . . ?
 N1 C9 C10 113.7(4) . . ?
 H9A C9 H9B 107.7 . . ?
 C10 C9 H9A 108.8 . . ?
 C10 C9 H9B 108.8 . . ?
 C11 C10 C9 119.4(4) . . ?
 C15 C10 C9 121.8(4) . . ?
 C15 C10 C11 118.7(4) . . ?
 C10 C11 H11 120.1 . . ?
 C12 C11 C10 119.9(5) . . ?
 C12 C11 H11 120.1 . . ?
 C11 C12 H12 119.5 . . ?
 C13 C12 C11 121.0(5) . . ?
 C13 C12 H12 119.5 . . ?
 C12 C13 H13 120.4 . . ?
 C12 C13 C14 119.3(5) . . ?
 C14 C13 H13 120.4 . . ?
 C13 C14 H14 119.6 . . ?
 C13 C14 C15 120.8(5) . . ?
 C15 C14 H14 119.6 . . ?
 C10 C15 C14 120.3(4) . . ?
 C10 C15 H15 119.9 . . ?
 C14 C15 H15 119.9 . . ?
 N3 C16 N2 116.0(3) . . ?
 N3 C16 C17 123.9(4) . . ?
 C17 C16 N2 120.1(4) . . ?
 C16 C17 C2 124.6(3) . . ?
 C16 C17 C18 117.5(4) . . ?
 C18 C17 C2 117.9(4) . . ?
 N4 C18 C17 178.2(7) . . ?
 C20 C19 C2 116.7(3) . . ?
 C24 C19 C2 123.5(3) . . ?
 C24 C19 C20 119.7(3) . . ?
 O2 C20 C19 120.2(3) . . ?
 O2 C20 C21 120.6(4) . . ?
 C19 C20 C21 119.2(3) . . ?
 C20 C21 H21A 108.7 . . ?
 C20 C21 H21B 108.7 . . ?
 C20 C21 C22 114.3(4) . . ?
 H21A C21 H21B 107.6 . . ?
 C22 C21 H21A 108.7 . . ?
 C22 C21 H21B 108.7 . . ?
 C21 C22 C23 108.4(3) . . ?
 C21 C22 C25 110.3(4) . . ?
 C21 C22 C26 109.6(4) . . ?
 C23 C22 C25 110.0(4) . . ?
 C23 C22 C26 108.8(3) . . ?
 C25 C22 C26 109.7(4) . . ?
 C22 C23 H23A 108.8 . . ?
 C22 C23 H23B 108.8 . . ?
 H23A C23 H23B 107.7 . . ?
 C24 C23 C22 113.6(3) . . ?
 C24 C23 H23A 108.8 . . ?
 C24 C23 H23B 108.8 . . ?
 N2 C24 C23 115.9(3) . . ?
 C19 C24 N2 121.5(3) . . ?
 C19 C24 C23 122.6(3) . . ?
 C22 C25 H25A 109.5 . . ?
 C22 C25 H25B 109.5 . . ?
 C22 C25 H25C 109.5 . . ?
 H25A C25 H25B 109.5 . . ?
 H25A C25 H25C 109.5 . . ?
 H25B C25 H25C 109.5 . . ?
 C22 C26 H26A 109.5 . . ?
 C22 C26 H26B 109.5 . . ?
 C22 C26 H26C 109.5 . . ?
 H26A C26 H26B 109.5 . . ?
 H26A C26 H26C 109.5 . . ?
 H26B C26 H26C 109.5 . . ?
 C28 C27 N2 119.5(4) . . ?
 C32 C27 N2 121.7(4) . . ?
 C32 C27 C28 118.7(4) . . ?
 C27 C28 H28 119.9 . . ?
 C27 C28 C29 120.1(5) . . ?
 C29 C28 H28 119.9 . . ?
 C28 C29 H29 119.9 . . ?
 C30 C29 C28 120.3(5) . . ?
 C30 C29 H29 119.9 . . ?
 O3 C30 C29 115.2(5) . . ?
 C31 C30 O3 124.8(5) . . ?
 C31 C30 C29 120.0(4) . . ?
 C30 C31 H31 120.3 . . ?
 C30 C31 C32 119.4(5) . . ?
 C32 C31 H31 120.3 . . ?
 C27 C32 C31 121.6(5) . . ?
 C27 C32 H32 119.2 . . ?
 C31 C32 H32 119.2 . . ?
 O3 C33 H33A 109.5 . . ?
 O3 C33 H33B 109.5 . . ?
 O3 C33 H33C 109.5 . . ?
 H33A C33 H33B 109.5 . . ?
 H33A C33 H33C 109.5 . . ?
 H33B C33 H33C 109.5 . . ?
 C30A O3A C33A 117.4(5) . . ?
 C1A N1A C8A 111.6(3) . . ?
 C1A N1A C9A 123.8(4) . . ?
 C8A N1A C9A 124.0(4) . . ?
 C16A N2A C27A 117.4(3) . . ?
 C24A N2A C16A 119.5(3) . . ?
 C24A N2A C27A 122.6(3) . . ?
 H3AA N3A H3AB 108.4 . . ?
 C16A N3A H3AA 109.3 . . ?
 C16A N3A H3AB 110.8 . . ?
 O1A C1A N1A 125.4(4) . . ?
 O1A C1A C2A 127.0(4) . . ?
 N1A C1A C2A 107.4(4) . . ?
 C3A C2A C1A 101.9(3) . . ?
 C3A C2A C17A 112.6(3) . . ?
 C3A C2A C19A 113.0(3) . . ?
 C17A C2A C1A 108.4(3) . . ?
 C17A C2A C19A 108.5(3) . . ?
 C19A C2A C1A 112.3(3) . . ?
 C4A C3A C2A 130.7(3) . . ?
 C4A C3A C8A 120.1(4) . . ?
 C8A C3A C2A 109.1(4) . . ?
 C3A C4A H4A 120.4 . . ?
 C3A C4A C5A 119.2(4) . . ?
 C5A C4A H4A 120.4 . . ?
 C4A C5A H5A 120.2 . . ?
 C6A C5A C4A 119.6(5) . . ?
 C6A C5A H5A 120.2 . . ?
 C5A C6A H6A 119.1 . . ?
 C7A C6A C5A 121.8(5) . . ?
 C7A C6A H6A 119.1 . . ?
 C6A C7A H7A 121.0 . . ?
 C6A C7A C8A 118.1(5) . . ?
 C8A C7A H7A 121.0 . . ?
 C3A C8A N1A 109.5(4) . . ?
 C7A C8A N1A 129.3(4) . . ?
 C7A C8A C3A 121.3(5) . . ?
 N1A C9A H9AA 108.8 . . ?
 N1A C9A H9AB 108.8 . . ?
 N1A C9A C10A 113.7(4) . . ?
 H9AA C9A H9AB 107.7 . . ?
 C10A C9A H9AA 108.8 . . ?
 C10A C9A H9AB 108.8 . . ?
 C11A C10A C9A 120.0(4) . . ?
 C15A C10A C9A 121.6(4) . . ?
 C15A C10A C11A 118.4(4) . . ?
 C10A C11A H11A 120.0 . . ?
 C10A C11A C12A 119.9(5) . . ?
 C12A C11A H11A 120.0 . . ?
 C11A C12A H12A 119.4 . . ?
 C13A C12A C11A 121.1(5) . . ?
 C13A C12A H12A 119.4 . . ?
 C12A C13A H13A 120.2 . . ?
 C12A C13A C14A 119.6(5) . . ?
 C14A C13A H13A 120.2 . . ?
 C13A C14A H14A 120.1 . . ?
 C13A C14A C15A 119.9(5) . . ?
 C15A C14A H14A 120.1 . . ?
 C10A C15A C14A 121.0(4) . . ?
 C10A C15A H15A 119.5 . . ?
 C14A C15A H15A 119.5 . . ?
 N3A C16A N2A 116.3(3) . . ?
 N3A C16A C17A 123.2(3) . . ?
 C17A C16A N2A 120.6(3) . . ?
 C16A C17A C2A 123.7(3) . . ?
 C16A C17A C18A 118.0(3) . . ?
 C18A C17A C2A 118.2(3) . . ?
 N4A C18A C17A 178.1(5) . . ?
 C20A C19A C2A 116.8(3) . . ?
 C24A C19A C2A 122.8(3) . . ?
 C24A C19A C20A 120.3(3) . . ?
 O2A C20A C19A 120.3(3) . . ?
 O2A C20A C21A 120.0(4) . . ?
 C19A C20A C21A 119.6(3) . . ?
 C20A C21A H21C 109.1 . . ?
 C20A C21A H21D 109.1 . . ?
 C20A C21A C22A 112.6(3) . . ?
 H21C C21A H21D 107.8 . . ?
 C22A C21A H21C 109.1 . . ?
 C22A C21A H21D 109.1 . . ?
 C23A C22A C21A 108.4(4) . . ?
 C23A C22A C26A 109.4(4) . . ?
 C25A C22A C21A 109.9(4) . . ?
 C25A C22A C23A 110.7(4) . . ?
 C25A C22A C26A 108.7(4) . . ?
 C26A C22A C21A 109.6(4) . . ?
 C22A C23A H23C 108.6 . . ?
 C22A C23A H23D 108.6 . . ?
 H23C C23A H23D 107.6 . . ?
 C24A C23A C22A 114.5(3) . . ?
 C24A C23A H23C 108.6 . . ?
 C24A C23A H23D 108.6 . . ?
 N2A C24A C23A 116.6(3) . . ?
 C19A C24A N2A 121.9(3) . . ?
 C19A C24A C23A 121.4(3) . . ?
 C22A C25A H25D 109.5 . . ?
 C22A C25A H25E 109.5 . . ?
 C22A C25A H25F 109.5 . . ?
 H25D C25A H25E 109.5 . . ?
 H25D C25A H25F 109.5 . . ?
 H25E C25A H25F 109.5 . . ?
 C22A C26A H26D 109.5 . . ?
 C22A C26A H26E 109.5 . . ?
 C22A C26A H26F 109.5 . . ?
 H26D C26A H26E 109.5 . . ?
 H26D C26A H26F 109.5 . . ?
 H26E C26A H26F 109.5 . . ?
 C28A C27A N2A 120.6(4) . . ?
 C32A C27A N2A 120.0(4) . . ?
 C32A C27A C28A 119.2(4) . . ?
 C27A C28A H28A 120.0 . . ?
 C27A C28A C29A 120.0(4) . . ?
 C29A C28A H28A 120.0 . . ?
 C28A C29A H29A 119.7 . . ?
 C30A C29A C28A 120.6(5) . . ?
 C30A C29A H29A 119.7 . . ?
 O3A C30A C29A 115.9(5) . . ?
 O3A C30A C31A 124.9(5) . . ?
 C31A C30A C29A 119.2(4) . . ?
 C30A C31A H31A 119.8 . . ?
 C30A C31A C32A 120.4(5) . . ?
 C32A C31A H31A 119.8 . . ?
 C27A C32A C31A 120.5(5) . . ?
 C27A C32A H32A 119.7 . . ?
 C31A C32A H32A 119.7 . . ?
 O3A C33A H33D 109.5 . . ?
 O3A C33A H33E 109.5 . . ?
 O3A C33A H33F 109.5 . . ?
 H33D C33A H33E 109.5 . . ?
 H33D C33A H33F 109.5 . . ?
 H33E C33A H33F 109.5 . . ?

loop_
  _geom_hbond_atom_site_label_D
  _geom_hbond_atom_site_label_H
  _geom_hbond_atom_site_label_A
  _geom_hbond_distance_DH
  _geom_hbond_distance_HA
  _geom_hbond_distance_DA
  _geom_hbond_angle_DHA
  _geom_hbond_site_symmetry_A
 N3 H3A N4A 0.86 2.21 2.966(5) 147.1 .
 N3A H3AB N4 0.87 2.20 2.911(6) 139.2 .
 C21A H21C O2 0.97 2.63 3.592(6) 171.6 3_545

loop_
  _geom_torsion_atom_site_label_1
  _geom_torsion_atom_site_label_2
  _geom_torsion_atom_site_label_3
  _geom_torsion_atom_site_label_4
  _geom_torsion
  _geom_torsion_site_symmetry_1
  _geom_torsion_site_symmetry_2
  _geom_torsion_site_symmetry_3
  _geom_torsion_site_symmetry_4
  _geom_torsion_publ_flag
 O1 C1 C2 C3 -176.5(4) . . . . ?
 O1 C1 C2 C17 65.4(5) . . . . ?
 O1 C1 C2 C19 -56.0(6) . . . . ?
 O2 C20 C21 C22 153.4(4) . . . . ?
 O3 C30 C31 C32 -178.9(5) . . . . ?
 N1 C1 C2 C3 7.3(4) . . . . ?
 N1 C1 C2 C17 -110.8(4) . . . . ?
 N1 C1 C2 C19 127.8(4) . . . . ?
 N1 C9 C10 C11 -144.2(5) . . . . ?
 N1 C9 C10 C15 40.0(7) . . . . ?
 N2 C16 C17 C2 3.1(8) . . . . ?
 N2 C16 C17 C18 -178.3(5) . . . . ?
 N2 C27 C28 C29 -177.0(5) . . . . ?
 N2 C27 C32 C31 176.4(4) . . . . ?
 N3 C16 C17 C2 -177.8(5) . . . . ?
 N3 C16 C17 C18 0.9(9) . . . . ?
 C1 N1 C8 C3 6.8(5) . . . . ?
 C1 N1 C8 C7 -171.4(5) . . . . ?
 C1 N1 C9 C10 -119.7(5) . . . . ?
 C1 C2 C3 C4 174.6(5) . . . . ?
 C1 C2 C3 C8 -3.4(4) . . . . ?
 C1 C2 C17 C16 -135.1(5) . . . . ?
 C1 C2 C17 C18 46.3(6) . . . . ?
 C1 C2 C19 C20 -51.6(5) . . . . ?
 C1 C2 C19 C24 132.8(5) . . . . ?
 C2 C3 C4 C5 -177.2(5) . . . . ?
 C2 C3 C8 N1 -1.6(5) . . . . ?
 C2 C3 C8 C7 176.8(4) . . . . ?
 C2 C19 C20 O2 4.2(7) . . . . ?
 C2 C19 C20 C21 -172.4(4) . . . . ?
 C2 C19 C24 N2 -5.3(7) . . . . ?
 C2 C19 C24 C23 174.1(4) . . . . ?
 C3 C2 C17 C16 114.6(5) . . . . ?
 C3 C2 C17 C18 -64.0(6) . . . . ?
 C3 C2 C19 C20 62.1(5) . . . . ?
 C3 C2 C19 C24 -113.5(5) . . . . ?
 C3 C4 C5 C6 0.7(10) . . . . ?
 C4 C3 C8 N1 -179.7(4) . . . . ?
 C4 C3 C8 C7 -1.4(7) . . . . ?
 C4 C5 C6 C7 -1.1(11) . . . . ?
 C5 C6 C7 C8 0.4(10) . . . . ?
 C6 C7 C8 N1 178.9(5) . . . . ?
 C6 C7 C8 C3 0.9(8) . . . . ?
 C8 N1 C1 O1 174.8(4) . . . . ?
 C8 N1 C1 C2 -8.9(5) . . . . ?
 C8 N1 C9 C10 71.8(6) . . . . ?
 C8 C3 C4 C5 0.6(8) . . . . ?
 C9 N1 C1 O1 5.0(7) . . . . ?
 C9 N1 C1 C2 -178.7(4) . . . . ?
 C9 N1 C8 C3 176.5(4) . . . . ?
 C9 N1 C8 C7 -1.7(7) . . . . ?
 C9 C10 C11 C12 -174.9(5) . . . . ?
 C9 C10 C15 C14 176.0(5) . . . . ?
 C10 C11 C12 C13 -0.6(8) . . . . ?
 C11 C10 C15 C14 0.1(7) . . . . ?
 C11 C12 C13 C14 -1.2(8) . . . . ?
 C12 C13 C14 C15 2.3(8) . . . . ?
 C13 C14 C15 C10 -1.8(8) . . . . ?
 C15 C10 C11 C12 1.1(7) . . . . ?
 C16 N2 C24 C19 -4.1(7) . . . . ?
 C16 N2 C24 C23 176.4(4) . . . . ?
 C16 N2 C27 C28 82.5(6) . . . . ?
 C16 N2 C27 C32 -94.1(5) . . . . ?
 C17 C2 C3 C4 -70.4(6) . . . . ?
 C17 C2 C3 C8 111.7(4) . . . . ?
 C17 C2 C19 C20 -172.6(4) . . . . ?
 C17 C2 C19 C24 11.8(6) . . . . ?
 C19 C2 C3 C4 53.0(6) . . . . ?
 C19 C2 C3 C8 -124.9(4) . . . . ?
 C19 C2 C17 C16 -10.7(7) . . . . ?
 C19 C2 C17 C18 170.6(5) . . . . ?
 C19 C20 C21 C22 -30.0(6) . . . . ?
 C20 C19 C24 N2 179.2(4) . . . . ?
 C20 C19 C24 C23 -1.4(7) . . . . ?
 C20 C21 C22 C23 51.4(5) . . . . ?
 C20 C21 C22 C25 -69.2(5) . . . . ?
 C20 C21 C22 C26 169.9(4) . . . . ?
 C21 C22 C23 C24 -48.8(5) . . . . ?
 C22 C23 C24 N2 -154.8(4) . . . . ?
 C22 C23 C24 C19 25.7(6) . . . . ?
 C24 N2 C16 N3 -174.0(5) . . . . ?
 C24 N2 C16 C17 5.2(7) . . . . ?
 C24 N2 C27 C28 -93.1(5) . . . . ?
 C24 N2 C27 C32 90.3(5) . . . . ?
 C24 C19 C20 O2 180.0(4) . . . . ?
 C24 C19 C20 C21 3.4(7) . . . . ?
 C25 C22 C23 C24 71.9(5) . . . . ?
 C26 C22 C23 C24 -167.9(4) . . . . ?
 C27 N2 C16 N3 10.3(7) . . . . ?
 C27 N2 C16 C17 -170.5(5) . . . . ?
 C27 N2 C24 C19 171.4(4) . . . . ?
 C27 N2 C24 C23 -8.0(6) . . . . ?
 C27 C28 C29 C30 0.1(9) . . . . ?
 C28 C27 C32 C31 -0.2(7) . . . . ?
 C28 C29 C30 O3 178.6(5) . . . . ?
 C28 C29 C30 C31 0.7(9) . . . . ?
 C29 C30 C31 C32 -1.2(8) . . . . ?
 C30 C31 C32 C27 1.0(7) . . . . ?
 C32 C27 C28 C29 -0.4(8) . . . . ?
 C33 O3 C30 C29 176.0(5) . . . . ?
 C33 O3 C30 C31 -6.2(8) . . . . ?
 O1A C1A C2A C3A -178.0(4) . . . . ?
 O1A C1A C2A C17A 63.1(5) . . . . ?
 O1A C1A C2A C19A -56.8(5) . . . . ?
 O2A C20A C21A C22A -150.6(4) . . . . ?
 O3A C30A C31A C32A 178.3(6) . . . . ?
 N1A C1A C2A C3A 6.8(4) . . . . ?
 N1A C1A C2A C17A -112.1(4) . . . . ?
 N1A C1A C2A C19A 128.1(3) . . . . ?
 N1A C9A C10A C11A -140.7(5) . . . . ?
 N1A C9A C10A C15A 39.2(8) . . . . ?
 N2A C16A C17A C2A 9.3(7) . . . . ?
 N2A C16A C17A C18A -175.3(4) . . . . ?
 N2A C27A C28A C29A 173.5(4) . . . . ?
 N2A C27A C32A C31A -174.7(5) . . . . ?
 N3A C16A C17A C2A -170.9(4) . . . . ?
 N3A C16A C17A C18A 4.5(7) . . . . ?
 C1A N1A C8A C3A 3.0(5) . . . . ?
 C1A N1A C8A C7A -175.9(4) . . . . ?
 C1A N1A C9A C10A -119.7(5) . . . . ?
 C1A C2A C3A C4A 177.2(4) . . . . ?
 C1A C2A C3A C8A -5.2(4) . . . . ?
 C1A C2A C17A C16A -141.2(4) . . . . ?
 C1A C2A C17A C18A 43.5(5) . . . . ?
 C1A C2A C19A C20A -46.2(5) . . . . ?
 C1A C2A C19A C24A 136.4(4) . . . . ?
 C2A C3A C4A C5A 178.6(4) . . . . ?
 C2A C3A C8A N1A 1.8(4) . . . . ?
 C2A C3A C8A C7A -179.2(4) . . . . ?
 C2A C19A C20A O2A 1.8(6) . . . . ?
 C2A C19A C20A C21A -179.1(4) . . . . ?
 C2A C19A C24A N2A -5.0(6) . . . . ?
 C2A C19A C24A C23A 175.2(4) . . . . ?
 C3A C2A C17A C16A 106.9(4) . . . . ?
 C3A C2A C17A C18A -68.4(5) . . . . ?
 C3A C2A C19A C20A 68.4(4) . . . . ?
 C3A C2A C19A C24A -109.0(4) . . . . ?
 C3A C4A C5A C6A -0.7(7) . . . . ?
 C4A C3A C8A N1A 179.7(4) . . . . ?
 C4A C3A C8A C7A -1.3(6) . . . . ?
 C4A C5A C6A C7A 0.4(8) . . . . ?
 C5A C6A C7A C8A -0.6(8) . . . . ?
 C6A C7A C8A N1A 179.7(5) . . . . ?
 C6A C7A C8A C3A 1.0(7) . . . . ?
 C8A N1A C1A O1A 178.4(4) . . . . ?
 C8A N1A C1A C2A -6.3(4) . . . . ?
 C8A N1A C9A C10A 69.9(6) . . . . ?
 C8A C3A C4A C5A 1.2(6) . . . . ?
 C9A N1A C1A O1A 7.0(7) . . . . ?
 C9A N1A C1A C2A -177.7(4) . . . . ?
 C9A N1A C8A C3A 174.4(3) . . . . ?
 C9A N1A C8A C7A -4.5(7) . . . . ?
 C9A C10A C11A C12A -179.4(5) . . . . ?
 C9A C10A C15A C14A -179.1(5) . . . . ?
 C10A C11A C12A C13A -1.4(9) . . . . ?
 C11A C10A C15A C14A 0.8(8) . . . . ?
 C11A C12A C13A C14A 0.5(10) . . . . ?
 C12A C13A C14A C15A 1.0(10) . . . . ?
 C13A C14A C15A C10A -1.6(9) . . . . ?
 C15A C10A C11A C12A 0.7(8) . . . . ?
 C16A N2A C24A C19A -7.3(6) . . . . ?
 C16A N2A C24A C23A 172.5(4) . . . . ?
 C16A N2A C27A C28A -83.6(5) . . . . ?
 C16A N2A C27A C32A 91.4(5) . . . . ?
 C17A C2A C3A C4A -66.9(5) . . . . ?
 C17A C2A C3A C8A 110.7(4) . . . . ?
 C17A C2A C19A C20A -166.0(3) . . . . ?
 C17A C2A C19A C24A 16.7(5) . . . . ?
 C19A C2A C3A C4A 56.5(5) . . . . ?
 C19A C2A C3A C8A -125.9(3) . . . . ?
 C19A C2A C17A C16A -19.0(6) . . . . ?
 C19A C2A C17A C18A 165.7(4) . . . . ?
 C19A C20A C21A C22A 30.3(6) . . . . ?
 C20A C19A C24A N2A 177.7(4) . . . . ?
 C20A C19A C24A C23A -2.1(6) . . . . ?
 C20A C21A C22A C23A -52.4(5) . . . . ?
 C20A C21A C22A C25A 68.7(5) . . . . ?
 C20A C21A C22A C26A -171.8(4) . . . . ?
 C21A C22A C23A C24A 49.6(5) . . . . ?
 C22A C23A C24A N2A 156.6(4) . . . . ?
 C22A C23A C24A C19A -23.5(6) . . . . ?
 C24A N2A C16A N3A -174.7(4) . . . . ?
 C24A N2A C16A C17A 5.2(6) . . . . ?
 C24A N2A C27A C28A 88.3(5) . . . . ?
 C24A N2A C27A C32A -96.7(5) . . . . ?
 C24A C19A C20A O2A 179.2(4) . . . . ?
 C24A C19A C20A C21A -1.7(6) . . . . ?
 C25A C22A C23A C24A -71.0(5) . . . . ?
 C26A C22A C23A C24A 169.1(4) . . . . ?
 C27A N2A C16A N3A -2.5(6) . . . . ?
 C27A N2A C16A C17A 177.3(4) . . . . ?
 C27A N2A C24A C19A -179.0(4) . . . . ?
 C27A N2A C24A C23A 0.8(6) . . . . ?
 C27A C28A C29A C30A 0.9(9) . . . . ?
 C28A C27A C32A C31A 0.4(8) . . . . ?
 C28A C29A C30A O3A -179.4(5) . . . . ?
 C28A C29A C30A C31A 1.0(9) . . . . ?
 C29A C30A C31A C32A -2.2(9) . . . . ?
 C30A C31A C32A C27A 1.5(10) . . . . ?
 C32A C27A C28A C29A -1.6(8) . . . . ?
 C33A O3A C30A C29A -174.2(6) . . . . ?
 C33A O3A C30A C31A 5.3(9) . . . . ?

_shelx_res_file
;
TITL cu_dm15841_0m in C2
CELL 1.54178 32.0719 9.2396 20.2331 90 109.779 90
ZERR 8 0.0007 0.0002 0.0004 0 0.001 0
LATT -7
SYMM -X,+Y,-Z

SFAC C H N O
UNIT 264 240 32 24
EQIV $1 0.5+X,-0.5+Y,+Z

L.S. 5
PLAN  -5 0 0
SIZE 0.05 0.1 0.28
TEMP 22.85
HTAB N3 N4A
HTAB N3A N4
HTAB C21A O2_$1
BOND $H
MORE -1
CONF
fmap 2
acta
REM <HKL>D:/data/guest/dm15841/cu_dm15841_0m.hkl</HKL>

WGHT    0.090500
EXTI    0.000694
FVAR       0.05444
O1    4   -0.927129   -0.497062   -0.358465    11.00000    0.09077    0.08379 =
         0.08608   -0.01393    0.03085   -0.02284
O2    4   -0.974220   -0.211012   -0.315109    11.00000    0.06019    0.11150 =
         0.05964    0.01267    0.01701    0.01606
O3    4   -0.754930   -0.470487    0.150153    11.00000    0.12472    0.11840 =
         0.05746    0.00555    0.00406    0.00016
N1    3   -0.914415   -0.280888   -0.404029    11.00000    0.06219    0.08621 =
         0.04898    0.00010    0.01899   -0.00157
N2    3   -0.849553   -0.392477   -0.134150    11.00000    0.05427    0.08737 =
         0.05084    0.00692    0.01894    0.00911
N3    3   -0.786350   -0.481538   -0.151062    11.00000    0.06423    0.14467 =
         0.06594    0.02232    0.02650    0.03658
AFIX  93
H3A   2   -0.770465   -0.500308   -0.176774    11.00000   -1.20000
H3B   2   -0.776884   -0.504118   -0.107243    11.00000   -1.20000
AFIX   0
N4    3   -0.798686   -0.430895   -0.328196    11.00000    0.06557    0.25610 =
         0.06233    0.01290    0.02519    0.04991
C1    1   -0.913001   -0.374915   -0.351152    11.00000    0.05626    0.08022 =
         0.05980   -0.00802    0.02120   -0.00188
C2    1   -0.887171   -0.300221   -0.280039    11.00000    0.05210    0.07404 =
         0.05147   -0.00178    0.01994   -0.00238
C3    1   -0.881518   -0.149072   -0.305094    11.00000    0.06193    0.07872 =
         0.05501   -0.00420    0.02738    0.00201
C4    1   -0.864360   -0.026636   -0.268183    11.00000    0.10509    0.08984 =
         0.07850   -0.01797    0.04737   -0.01859
AFIX  43
H4    2   -0.852578   -0.029617   -0.219413    11.00000   -1.20000
AFIX   0
C5    1   -0.864490    0.102398   -0.303433    11.00000    0.16108    0.08178 =
         0.12280   -0.02040    0.08324   -0.02746
AFIX  43
H5    2   -0.852590    0.186106   -0.278707    11.00000   -1.20000
AFIX   0
C6    1   -0.882632    0.104346   -0.376005    11.00000    0.15443    0.08823 =
         0.12299    0.01804    0.08693    0.00255
AFIX  43
H6    2   -0.883186    0.191200   -0.399517    11.00000   -1.20000
AFIX   0
C7    1   -0.899747   -0.016750   -0.414307    11.00000    0.10619    0.08883 =
         0.07403    0.01179    0.04321    0.01022
AFIX  43
H7    2   -0.911656   -0.013482   -0.463062    11.00000   -1.20000
AFIX   0
C8    1   -0.898761   -0.144279   -0.378128    11.00000    0.06553    0.08038 =
         0.05810    0.00323    0.02835    0.00315
C9    1   -0.936917   -0.313040   -0.478496    11.00000    0.06255    0.13329 =
         0.05028   -0.01341    0.00833   -0.00909
AFIX  23
H9A   2   -0.960267   -0.242444   -0.497804    11.00000   -1.20000
H9B   2   -0.950704   -0.407600   -0.482601    11.00000   -1.20000
AFIX   0
C10   1   -0.906302   -0.311625   -0.521900    11.00000    0.06642    0.07811 =
         0.04852   -0.00885    0.01259   -0.00115
C11   1   -0.922088   -0.260217   -0.590470    11.00000    0.07373    0.08588 =
         0.05439   -0.00706    0.00767    0.00152
AFIX  43
H11   2   -0.950279   -0.219996   -0.608263    11.00000   -1.20000
AFIX   0
C12   1   -0.895683   -0.269033   -0.632354    11.00000    0.10465    0.09546 =
         0.05300   -0.00710    0.02453   -0.01802
AFIX  43
H12   2   -0.906518   -0.235231   -0.678331    11.00000   -1.20000
AFIX   0
C13   1   -0.854287   -0.326238   -0.607231    11.00000    0.09187    0.08417 =
         0.07491   -0.02105    0.03722   -0.01531
AFIX  43
H13   2   -0.837064   -0.333242   -0.635973    11.00000   -1.20000
AFIX   0
C14   1   -0.838204   -0.373415   -0.539246    11.00000    0.07532    0.06801 =
         0.08767   -0.00955    0.02684    0.00451
AFIX  43
H14   2   -0.809478   -0.409404   -0.521271    11.00000   -1.20000
AFIX   0
C15   1   -0.864255   -0.368238   -0.496699    11.00000    0.07430    0.07551 =
         0.06144   -0.00185    0.01859    0.00191
AFIX  43
H15   2   -0.853189   -0.403244   -0.450954    11.00000   -1.20000
AFIX   0
C16   1   -0.825992   -0.416875   -0.179381    11.00000    0.05764    0.08903 =
         0.05973    0.00715    0.02319    0.00932
C17   1   -0.843424   -0.377641   -0.247882    11.00000    0.05716    0.09417 =
         0.05545    0.00248    0.02270    0.00731
C18   1   -0.818301   -0.408949   -0.291876    11.00000    0.05684    0.14914 =
         0.05471    0.00796    0.01554    0.02162
C19   1   -0.911546   -0.300176   -0.228240    11.00000    0.05408    0.07188 =
         0.04994    0.00147    0.01778    0.00260
C20   1   -0.956790   -0.246016   -0.253317    11.00000    0.05270    0.07383 =
         0.05653    0.00460    0.01614    0.00350
C21   1   -0.980871   -0.225738   -0.201888    11.00000    0.05520    0.08840 =
         0.06701    0.00516    0.02087    0.01005
AFIX  23
H21A  2   -1.012383   -0.237587   -0.226525    11.00000   -1.20000
H21B  2   -0.976099   -0.127428   -0.184090    11.00000   -1.20000
AFIX   0
C22   1   -0.966767   -0.329485   -0.140139    11.00000    0.05782    0.07984 =
         0.06164   -0.00173    0.02804    0.00190
C23   1   -0.916476   -0.324182   -0.107272    11.00000    0.05863    0.08313 =
         0.05487    0.00298    0.02374    0.00468
AFIX  23
H23A  2   -0.908032   -0.233247   -0.082364    11.00000   -1.20000
H23B  2   -0.906818   -0.401697   -0.073146    11.00000   -1.20000
AFIX   0
C24   1   -0.892691   -0.338355   -0.160126    11.00000    0.05047    0.07013 =
         0.05272    0.00001    0.01919    0.00239
C25   1   -0.981765   -0.482892   -0.164571    11.00000    0.09438    0.08786 =
         0.09595   -0.01104    0.03965   -0.02201
AFIX 137
H25A  2   -0.968982   -0.512309   -0.199032    11.00000   -1.50000
H25B  2   -1.013488   -0.485357   -0.184896    11.00000   -1.50000
H25C  2   -0.972270   -0.547619   -0.125171    11.00000   -1.50000
AFIX   0
C26   1   -0.987019   -0.282085   -0.085355    11.00000    0.06607    0.11857 =
         0.07342    0.00014    0.03490    0.01193
AFIX 137
H26A  2   -0.977463   -0.346427   -0.045809    11.00000   -1.50000
H26B  2   -1.018745   -0.284669   -0.105586    11.00000   -1.50000
H26C  2   -0.977585   -0.185346   -0.070213    11.00000   -1.50000
AFIX   0
C27   1   -0.826894   -0.415042   -0.059519    11.00000    0.04986    0.07032 =
         0.05489    0.00409    0.01697    0.00427
C28   1   -0.800331   -0.307269   -0.020120    11.00000    0.10492    0.06694 =
         0.07193    0.00773    0.01674   -0.00979
AFIX  43
H28   2   -0.798094   -0.219158   -0.040889    11.00000   -1.20000
AFIX   0
C29   1   -0.777015   -0.329665    0.050116    11.00000    0.11607    0.08476 =
         0.06818   -0.00022    0.00691   -0.01873
AFIX  43
H29   2   -0.759124   -0.256517    0.076589    11.00000   -1.20000
AFIX   0
C30   1   -0.780113   -0.459361    0.081058    11.00000    0.07449    0.08739 =
         0.05206    0.00498    0.01449    0.00542
C31   1   -0.805835   -0.566898    0.042300    11.00000    0.07729    0.07469 =
         0.06686    0.01379    0.02482    0.00026
AFIX  43
H31   2   -0.807604   -0.655720    0.062811    11.00000   -1.20000
AFIX   0
C32   1   -0.829366   -0.543056   -0.027944    11.00000    0.06414    0.07748 =
         0.06713    0.00502    0.01496   -0.00615
AFIX  43
H32   2   -0.847306   -0.616336   -0.054204    11.00000   -1.20000
AFIX   0
C33   1   -0.759318   -0.599834    0.185587    11.00000    0.13178    0.12649 =
         0.06409    0.02692    0.02328    0.03600
AFIX 137
H33A  2   -0.751500   -0.681586    0.162919    11.00000   -1.50000
H33B  2   -0.789415   -0.609662    0.184127    11.00000   -1.50000
H33C  2   -0.739994   -0.595399    0.233586    11.00000   -1.50000
AFIX   0

O1A   4   -0.587897   -0.581909   -0.172072    11.00000    0.09401    0.06577 =
         0.08962    0.01790    0.03199    0.01514
O2A   4   -0.521137   -0.344153   -0.188765    11.00000    0.05500    0.10119 =
         0.06022    0.00589    0.01333    0.00495
O3A   4   -0.749284   -0.402247   -0.670575    11.00000    0.12850    0.10579 =
         0.04922   -0.00219    0.00122    0.00441
N1A   3   -0.586408   -0.374129   -0.109123    11.00000    0.05900    0.08374 =
         0.04545    0.01502    0.01493    0.00625
N2A   3   -0.653423   -0.367005   -0.384610    11.00000    0.06120    0.06814 =
         0.04430   -0.00115    0.01678   -0.00586
N3A   3   -0.722984   -0.411463   -0.376301    11.00000    0.06209    0.12127 =
         0.05471   -0.00826    0.01585   -0.01747
AFIX   7
H3AA  2   -0.726594   -0.472170   -0.410452    11.00000   -1.20000
H3AB  2   -0.735544   -0.446896   -0.348011    11.00000   -1.20000
AFIX   0
N4A   3   -0.708257   -0.459407   -0.197584    11.00000    0.06128    0.14523 =
         0.05703    0.00052    0.02060   -0.01317
C1A   1   -0.593298   -0.452962   -0.169488    11.00000    0.05845    0.06945 =
         0.05733    0.01080    0.02102    0.00408
C2A   1   -0.612740   -0.349037   -0.232165    11.00000    0.05249    0.05628 =
         0.04799    0.00333    0.01653    0.00230
C3A   1   -0.609340   -0.204676   -0.195709    11.00000    0.05125    0.06374 =
         0.04958   -0.00064    0.01934    0.00120
C4A   1   -0.619614   -0.068102   -0.222530    11.00000    0.06830    0.06550 =
         0.06384    0.00250    0.02326    0.00210
AFIX  43
H4A   2   -0.630089   -0.053175   -0.270835    11.00000   -1.20000
AFIX   0
C5A   1   -0.614176    0.048396   -0.176506    11.00000    0.08320    0.06309 =
         0.10031   -0.00624    0.04206   -0.00071
AFIX  43
H5A   2   -0.620682    0.141955   -0.193894    11.00000   -1.20000
AFIX   0
C6A   1   -0.599033    0.023812   -0.104793    11.00000    0.10088    0.08548 =
         0.09191   -0.03467    0.04537   -0.02236
AFIX  43
H6A   2   -0.595685    0.101919   -0.074439    11.00000   -1.20000
AFIX   0
C7A   1   -0.588880   -0.111847   -0.077390    11.00000    0.08118    0.09887 =
         0.06099   -0.01679    0.02761   -0.01155
AFIX  43
H7A   2   -0.578493   -0.126766   -0.029084    11.00000   -1.20000
AFIX   0
C8A   1   -0.594483   -0.226453   -0.123519    11.00000    0.05726    0.08215 =
         0.05079   -0.00410    0.02137   -0.00557
C9A   1   -0.566856   -0.433569   -0.038828    11.00000    0.07177    0.13144 =
         0.05758    0.02912    0.01727    0.01689
AFIX  23
H9AA  2   -0.539711   -0.381464   -0.014635    11.00000   -1.20000
H9AB  2   -0.559095   -0.533974   -0.042542    11.00000   -1.20000
AFIX   0
C10A  1   -0.596888   -0.425644    0.004643    11.00000    0.06848    0.08330 =
         0.05055    0.02081    0.01005    0.00040
C11A  1   -0.579556   -0.391763    0.075066    11.00000    0.07630    0.10496 =
         0.05098    0.01951    0.00544   -0.00910
AFIX  43
H11A  2   -0.549436   -0.372878    0.095680    11.00000   -1.20000
AFIX   0
C12A  1   -0.607080   -0.385869    0.115137    11.00000    0.10821    0.10365 =
         0.05179    0.01601    0.01805    0.00347
AFIX  43
H12A  2   -0.595040   -0.364960    0.162815    11.00000   -1.20000
AFIX   0
C13A  1   -0.650832   -0.409848    0.086251    11.00000    0.09569    0.10862 =
         0.06717    0.02811    0.03250    0.00585
AFIX  43
H13A  2   -0.668923   -0.404784    0.113685    11.00000   -1.20000
AFIX   0
C14A  1   -0.668718   -0.441925    0.015888    11.00000    0.07314    0.11096 =
         0.07868    0.02697    0.02136   -0.01135
AFIX  43
H14A  2   -0.699045   -0.457204   -0.004588    11.00000   -1.20000
AFIX   0
C15A  1   -0.641644   -0.451381   -0.024194    11.00000    0.07775    0.10080 =
         0.05322    0.01643    0.01271   -0.01167
AFIX  43
H15A  2   -0.653812   -0.475539   -0.071483    11.00000   -1.20000
AFIX   0
C16A  1   -0.679102   -0.390775   -0.342451    11.00000    0.05588    0.06524 =
         0.05463   -0.00694    0.01704   -0.00647
C17A  1   -0.660126   -0.392931   -0.270915    11.00000    0.05251    0.06786 =
         0.04809   -0.00221    0.01658   -0.00291
C18A  1   -0.687234   -0.428366   -0.231082    11.00000    0.05371    0.09191 =
         0.05148   -0.00929    0.01213   -0.00942
C19A  1   -0.587360   -0.353800   -0.283024    11.00000    0.05468    0.05353 =
         0.04671    0.00169    0.01475    0.00327
C20A  1   -0.539580   -0.348581   -0.253054    11.00000    0.06064    0.06327 =
         0.05467    0.00276    0.02040    0.00408
C21A  1   -0.512313   -0.350750   -0.300678    11.00000    0.05695    0.08603 =
         0.06969    0.00213    0.02415    0.01010
AFIX  23
H21C  2   -0.505208   -0.450221   -0.307942    11.00000   -1.20000
H21D  2   -0.484681   -0.299948   -0.278019    11.00000   -1.20000
AFIX   0
C22A  1   -0.536242   -0.280548   -0.372052    11.00000    0.06306    0.08300 =
         0.05630   -0.00170    0.02603   -0.00407
C23A  1   -0.581651   -0.350039   -0.403101    11.00000    0.07354    0.07816 =
         0.05166   -0.00918    0.02452   -0.00426
AFIX  23
H23C  2   -0.598635   -0.296063   -0.444600    11.00000   -1.20000
H23D  2   -0.577930   -0.447604   -0.417915    11.00000   -1.20000
AFIX   0
C24A  1   -0.607709   -0.356919   -0.353984    11.00000    0.05814    0.05222 =
         0.05009   -0.00331    0.02053   -0.00070
C25A  1   -0.540482   -0.118559   -0.363071    11.00000    0.09059    0.08600 =
         0.08194    0.00674    0.03069   -0.01342
AFIX 137
H25D  2   -0.556604   -0.075920   -0.407688    11.00000   -1.50000
H25E  2   -0.511493   -0.076121   -0.345078    11.00000   -1.50000
H25F  2   -0.556027   -0.101282   -0.330774    11.00000   -1.50000
AFIX   0
C26A  1   -0.509707   -0.305958   -0.421145    11.00000    0.08618    0.15284 =
         0.08129   -0.01645    0.04833   -0.01613
AFIX 137
H26D  2   -0.503722   -0.407459   -0.422735    11.00000   -1.50000
H26E  2   -0.482248   -0.253764   -0.404058    11.00000   -1.50000
H26F  2   -0.526492   -0.272602   -0.467462    11.00000   -1.50000
AFIX   0
C27A  1   -0.675544   -0.372717   -0.460086    11.00000    0.06208    0.06112 =
         0.04982   -0.00118    0.01620   -0.00344
C28A  1   -0.682524   -0.502539   -0.494870    11.00000    0.08964    0.06060 =
         0.05930    0.00161    0.01162    0.00789
AFIX  43
H28A  2   -0.670472   -0.586955   -0.470983    11.00000   -1.20000
AFIX   0
C29A  1   -0.707488   -0.507951   -0.565483    11.00000    0.10962    0.06875 =
         0.05878   -0.01397    0.00699    0.00458
AFIX  43
H29A  2   -0.712480   -0.596464   -0.588739    11.00000   -1.20000
AFIX   0
C30A  1   -0.724885   -0.384669   -0.601407    11.00000    0.08465    0.08374 =
         0.04743   -0.00003    0.00994   -0.00072
C31A  1   -0.716800   -0.255181   -0.567074    11.00000    0.13262    0.06809 =
         0.05917    0.01029    0.00270    0.01300
AFIX  43
H31A  2   -0.727681   -0.170281   -0.591516    11.00000   -1.20000
AFIX   0
C32A  1   -0.692627   -0.249303   -0.496436    11.00000    0.12440    0.05619 =
         0.06243   -0.00485    0.01148    0.00431
AFIX  43
H32A  2   -0.687888   -0.160676   -0.473284    11.00000   -1.20000
AFIX   0
C33A  1   -0.764599   -0.273601   -0.711717    11.00000    0.12436    0.13842 =
         0.06129    0.01835    0.00937    0.00780
AFIX 137
H33D  2   -0.781696   -0.300186   -0.759013    11.00000   -1.50000
H33E  2   -0.739611   -0.216559   -0.711856    11.00000   -1.50000
H33F  2   -0.782710   -0.218227   -0.691732    11.00000   -1.50000
AFIX   0
HKLF 4

REM  cu_dm15841_0m in C2
REM R1 =  0.0540 for    6617 Fo > 4sig(Fo)  and  0.0707 for all    8811 data
REM    729 parameters refined using      1 restraints

END

WGHT      0.0904      0.0000

REM Highest difference peak  0.281,  deepest hole -0.229,  1-sigma level  0.067
Q1    1  -0.7995 -0.3610  0.0721  11.00000  0.05    0.28
Q2    1  -0.7058 -0.3374 -0.5894  11.00000  0.05    0.25
Q3    1  -0.7430 -0.3974 -0.3565  11.00000  0.05    0.24
Q4    1  -0.9343 -0.4363 -0.4643  11.00000  0.05    0.24
Q5    1  -0.6002 -0.3858 -0.2652  11.00000  0.05    0.23
;
_shelx_res_checksum               38247
_shelx_hkl_file
;
  -2   0   0    0.11    0.02
  -4   0   0  135.61    5.90
  -4   0   0  140.44    5.51
  -4   0   0  135.74    5.70
  -8   0   0    0.82    0.07
  -8   0   0    0.82    0.08
 -10   0   0  133.19    5.40
 -10   0   0  125.44    5.58
 -12   0   0   52.49    2.18
 -12   0   0   49.96    2.63
 -12   0   0   52.59    2.27
 -14   0   0   18.93    0.99
 -14   0   0   19.24    0.86
 -14   0   0   18.09    0.82
 -16   0   0   69.15    3.09
 -16   0   0   71.68    2.98
 -18   0   0    6.60    0.33
 -18   0   0    6.20    0.35
 -20   0   0    0.32    0.07
 -20   0   0    0.33    0.08
 -22   0   0    0.01    0.05
 -26   0   0    0.12    0.05
 -26   0   0    0.06    0.06
 -28   0   0   -0.05    0.04
 -28   0   0    0.04    0.05
 -30   0   0    1.66    0.13
 -32   0   0    0.06    0.04
  -1  -1   0   18.54    0.82
  -1  -1   0   19.66    0.77
   1  -1   0   17.53    0.82
  -1  -1   0   19.01    0.82
  -3  -1   0    1.69    0.09
  -3  -1   0    1.74    0.09
  -3  -1   0    1.67    0.09
  -3  -1   0    1.79    0.09
  -5  -1   0    9.61    0.43
  -7  -1   0    2.21    0.12
   7  -1   0    2.15    0.11
  -7  -1   0    2.10    0.12
  -7  -1   0    2.21    0.12
  -7  -1   0    2.10    0.12
  -7   1   0    2.10    0.12
  -7   1   0    2.15    0.11
  -9  -1   0    2.45    0.14
  -9  -1   0    2.86    0.14
  -9   1   0    2.38    0.14
  -9   1   0    2.41    0.13
 -11  -1   0    2.70    0.17
 -11  -1   0    2.74    0.20
 -11  -1   0    3.05    0.17
 -11   1   0    2.92    0.15
 -11   1   0    2.99    0.17
 -13  -1   0    1.09    0.12
 -13  -1   0    1.08    0.11
 -13  -1   0    1.34    0.11
 -13   1   0    1.14    0.11
 -13   1   0    1.15    0.09
 -15  -1   0    0.39    0.07
 -15  -1   0    0.26    0.07
 -15  -1   0    0.25    0.06
 -15   1   0    0.30    0.05
 -15   1   0    0.16    0.05
 -17  -1   0    3.98    0.27
 -17  -1   0    3.77    0.23
 -17  -1   0    3.95    0.23
 -17   1   0    3.63    0.23
 -19  -1   0    0.19    0.06
 -19  -1   0    0.26    0.07
 -19   1   0    0.15    0.06
 -21  -1   0    0.45    0.09
 -21  -1   0    0.50    0.09
 -21   1   0    0.56    0.10
 -23  -1   0    0.06    0.06
 -23  -1   0    0.22    0.08
 -23  -1   0    0.26    0.09
 -23   1   0    0.13    0.07
 -25  -1   0    0.69    0.10
 -25  -1   0    0.37    0.07
 -25  -1   0    0.64    0.10
 -25   1   0    0.56    0.09
 -27  -1   0    0.30    0.06
 -27  -1   0    0.20    0.08
 -27  -1   0    0.32    0.08
 -27   1   0    0.30    0.07
 -29  -1   0    0.02    0.04
 -29  -1   0    0.05    0.05
 -29   1   0    0.05    0.05
 -31  -1   0    0.00    0.03
 -31  -1   0    0.02    0.05
 -31  -1   0    0.05    0.06
 -31   1   0   -0.03    0.04
 -33  -1   0    0.03    0.03
 -33  -1   0    0.04    0.04
   0  -2   0  992.27   41.96
   0  -2   0 1000.00   41.23
   0  -2   0  937.18   42.81
  -2  -2   0  167.78    6.53
  -2  -2   0  162.67    7.00
   2  -2   0  158.10    6.99
  -2  -2   0  163.44    6.99
  -2  -2   0  159.86    6.76
   2  -2   0  163.01    6.99
  -4  -2   0   59.10    2.32
  -4  -2   0   56.69    2.40
  -4  -2   0   57.41    2.48
   4  -2   0   56.64    2.47
   4  -2   0   56.00    2.48
  -6  -2   0    9.12    0.40
   6  -2   0    9.06    0.41
  -6  -2   0    9.34    0.41
  -6  -2   0    8.70    0.42
   6  -2   0    8.95    0.43
  -6  -2   0    9.38    0.42
   8  -2   0    7.69    0.36
  -8  -2   0    8.48    0.37
  -8  -2   0    7.82    0.38
  -8  -2   0    7.95    0.38
 -10  -2   0    4.35    0.22
 -10  -2   0    3.87    0.21
 -10  -2   0    3.94    0.21
 -10  -2   0    3.54    0.25
 -10   2   0    3.95    0.21
 -12  -2   0   35.23    1.53
 -12  -2   0   32.88    1.79
 -12  -2   0   34.80    1.49
 -12   2   0   35.27    1.54
 -14  -2   0    5.21    0.29
 -14  -2   0    5.19    0.34
 -14  -2   0    5.11    0.28
 -14   2   0    5.52    0.29
 -16  -2   0   18.62    0.89
 -16  -2   0   18.46    0.87
 -16  -2   0   20.60    1.04
 -16   2   0   18.71    0.89
 -18  -2   0    1.11    0.12
 -18  -2   0    1.42    0.16
 -18  -2   0    1.18    0.13
 -18   2   0    1.20    0.13
 -20  -2   0    0.14    0.07
 -20  -2   0    0.20    0.09
 -20  -2   0    0.34    0.08
 -22  -2   0    0.05    0.06
 -22  -2   0   -0.10    0.05
 -22  -2   0   -0.04    0.05
 -24  -2   0    0.16    0.07
 -24  -2   0    0.27    0.08
 -24  -2   0    0.23    0.06
 -24   2   0    0.29    0.08
 -26  -2   0    1.01    0.12
 -26  -2   0    0.62    0.08
 -26  -2   0    1.02    0.13
 -26   2   0    0.85    0.11
 -28  -2   0    0.58    0.08
 -28  -2   0    0.67    0.11
 -28  -2   0    0.41    0.08
 -28   2   0    0.45    0.08
 -30  -2   0    0.59    0.09
 -30  -2   0    0.76    0.08
 -30  -2   0    0.56    0.09
 -30   2   0    0.69    0.09
 -32  -2   0    0.20    0.06
 -32  -2   0    0.16    0.04
 -32  -2   0    0.13    0.06
 -34  -2   0    0.07    0.03
 -34  -2   0    0.15    0.04
 -34  -2   0    0.14    0.05
   1  -3   0   88.61    3.79
  -1  -3   0   89.02    3.80
  -1  -3   0   86.57    3.66
  -1  -3   0   88.60    3.79
   1  -3   0   87.43    3.79
   1  -3   0   85.76    3.65
   3  -3   0   33.66    1.49
  -3  -3   0   33.92    1.50
  -3  -3   0   34.66    1.44
   3  -3   0   33.59    1.50
  -3  -3   0   34.34    1.50
  -5  -3   0    7.63    0.37
  -5  -3   0    8.03    0.39
   5  -3   0    8.30    0.37
   5  -3   0    8.30    0.39
  -7  -3   0    9.36    0.44
   7  -3   0    8.95    0.41
  -7  -3   0    9.22    0.43
   7  -3   0    8.76    0.44
  -7  -3   0    8.96    0.42
  -7  -3   0    8.37    0.49
  -9  -3   0    3.60    0.24
  -9  -3   0    3.86    0.21
   9  -3   0    3.77    0.22
  -9  -3   0    3.61    0.21
  -9  -3   0    3.69    0.21
 -11  -3   0    0.50    0.08
 -11  -3   0    0.47    0.09
 -11  -3   0    0.51    0.07
  11  -3   0    0.52    0.08
 -11  -3   0    0.42    0.07
 -13  -3   0    1.68    0.15
  13  -3   0    1.78    0.17
 -13  -3   0    1.86    0.18
 -13  -3   0    1.86    0.15
 -15  -3   0    2.65    0.18
 -15  -3   0    2.52    0.18
  15  -3   0    2.78    0.20
 -15  -3   0    2.36    0.21
 -17  -3   0    2.84    0.23
 -17  -3   0    2.33    0.18
  17  -3   0    2.82    0.24
 -17  -3   0    2.20    0.19
 -19  -3   0    2.30    0.20
  19  -3   0    2.34    0.22
 -19  -3   0    1.89    0.21
 -19  -3   0    2.08    0.19
 -21  -3   0    4.46    0.28
 -21  -3   0    3.86    0.26
  21  -3   0    4.31    0.30
 -21  -3   0    3.33    0.24
 -23  -3   0    0.07    0.06
 -23  -3   0    0.08    0.05
 -23  -3   0    0.14    0.08
 -23  -3   0    0.17    0.07
 -23   3   0    0.06    0.06
 -25  -3   0    0.11    0.07
 -25  -3   0    0.14    0.08
 -25  -3   0    0.08    0.04
 -25  -3   0    0.06    0.06
 -25   3   0    0.02    0.06
 -27  -3   0    0.08    0.04
 -27  -3   0    0.06    0.05
 -27  -3   0    0.09    0.06
 -27   3   0    0.06    0.06
 -29  -3   0    0.63    0.10
 -29  -3   0    0.54    0.09
 -29  -3   0    0.59    0.07
 -29   3   0    0.45    0.08
 -31  -3   0    0.14    0.04
 -31  -3   0    0.12    0.05
 -31  -3   0    0.14    0.06
 -33  -3   0    0.15    0.04
 -33  -3   0    0.09    0.05
 -33  -3   0    0.13    0.04
   0  -4   0   33.84    1.50
   0  -4   0   34.15    1.51
  -2  -4   0   28.51    1.23
  -2  -4   0   28.56    1.29
   2  -4   0   29.02    1.29
   2  -4   0   29.37    1.28
  -2  -4   0   29.28    1.29
   4  -4   0   38.32    1.66
  -4  -4   0   39.40    1.68
  -4  -4   0   36.29    1.68
   4  -4   0   37.76    1.68
  -4  -4   0   37.70    1.61
  -6  -4   0    5.42    0.30
   6  -4   0    5.91    0.28
  -6  -4   0    5.59    0.34
  -6  -4   0    5.66    0.28
   6  -4   0    5.58    0.30
  -6  -4   0    5.44    0.30
  -8  -4   0    1.55    0.14
  -8  -4   0    1.22    0.12
  -8  -4   0    1.52    0.15
   8  -4   0    1.45    0.13
  -8  -4   0    1.42    0.12
 -10  -4   0    8.76    0.44
 -10  -4   0    8.27    0.45
  10  -4   0    9.36    0.45
 -10  -4   0    8.53    0.51
 -10  -4   0    8.47    0.43
 -12  -4   0    8.19    0.42
  12  -4   0    8.36    0.43
 -12  -4   0    8.20    0.49
 -12  -4   0    8.04    0.41
 -12  -4   0    7.25    0.42
 -14  -4   0    1.76    0.19
 -14  -4   0    1.50    0.15
  14  -4   0    1.59    0.17
 -14  -4   0    1.69    0.16
 -16  -4   0    1.70    0.20
 -16  -4   0    1.64    0.16
  16  -4   0    1.59    0.17
 -16  -4   0    1.83    0.18
 -18  -4   0    2.31    0.21
 -18  -4   0    2.32    0.24
 -18  -4   0    2.25    0.20
  18  -4   0    2.02    0.21
 -20  -4   0    0.02    0.08
 -20  -4   0    0.03    0.04
 -20  -4   0   -0.03    0.05
 -20  -4   0   -0.03    0.04
 -20  -4   0   -0.03    0.05
 -22  -4   0    0.22    0.08
 -22  -4   0    0.11    0.06
 -22  -4   0    0.23    0.08
 -22  -4   0    0.33    0.06
 -22   4   0    0.18    0.08
 -24  -4   0    0.45    0.10
 -24  -4   0    0.66    0.08
 -24  -4   0    0.61    0.10
 -24  -4   0    0.59    0.11
 -24   4   0    0.66    0.11
 -26  -4   0    1.18    0.13
 -26  -4   0    1.24    0.14
 -26  -4   0    1.38    0.16
 -26  -4   0    1.15    0.10
 -26   4   0    1.44    0.14
 -28  -4   0    0.31    0.09
 -28  -4   0    0.49    0.09
 -28  -4   0    0.37    0.08
 -28  -4   0    0.40    0.06
 -30  -4   0    0.23    0.08
 -30  -4   0    0.15    0.04
 -30  -4   0    0.17    0.05
 -30  -4   0    0.20    0.06
 -32  -4   0    0.10    0.04
 -32  -4   0    0.08    0.03
 -32  -4   0    0.08    0.04
 -34  -4   0    0.16    0.04
  -1  -5   0   18.04    0.81
  -1  -5   0   16.93    0.81
   1  -5   0   16.95    0.80
   1  -5   0   17.35    0.80
   3  -5   0   12.67    0.59
  -3  -5   0   11.75    0.60
  -3  -5   0   12.64    0.60
   3  -5   0   12.35    0.60
  -5  -5   0   16.86    0.81
   5  -5   0   17.17    0.80
  -5  -5   0   17.05    0.80
   7  -5   0   11.85    0.56
  -7  -5   0   10.60    0.56
  -7  -5   0   11.12    0.57
  -7  -5   0   11.70    0.54
  -9  -5   0    7.79    0.38
   9  -5   0    7.30    0.40
  -9  -5   0    7.27    0.45
  -9  -5   0    6.85    0.40
  -9  -5   0    7.46    0.40
 -11  -5   0    3.00    0.22
 -11  -5   0    2.77    0.21
 -11  -5   0    2.99    0.20
 -11  -5   0    3.31    0.24
  11  -5   0    2.84    0.21
 -13  -5   0    3.34    0.23
 -13  -5   0    3.16    0.24
 -13  -5   0    3.54    0.27
  13  -5   0    3.66    0.24
 -15  -5   0    1.33    0.15
  15  -5   0    1.54    0.17
 -15  -5   0    1.21    0.16
 -15  -5   0    1.59    0.19
 -17  -5   0    0.14    0.09
 -17  -5   0    0.05    0.07
 -17  -5   0    0.15    0.09
 -17  -5   0    0.05    0.06
 -19  -5   0    0.31    0.07
 -19  -5   0    0.41    0.09
 -19  -5   0    0.53    0.07
 -19  -5   0    0.47    0.10
 -19  -5   0    0.44    0.10
 -19  -5   0    0.64    0.14
 -19   5   0    0.35    0.09
 -21  -5   0    0.05    0.06
 -21  -5   0    0.20    0.08
 -21  -5   0    0.14    0.05
 -21  -5   0    0.15    0.07
 -21  -5   0    0.11    0.05
 -21   5   0    0.07    0.07
 -23  -5   0   -0.07    0.06
 -23  -5   0    0.00    0.05
 -23  -5   0    0.03    0.05
 -23  -5   0    0.04    0.04
 -23   5   0    0.07    0.07
 -25  -5   0    0.03    0.07
 -25  -5   0    0.04    0.04
 -25  -5   0    0.01    0.05
 -25  -5   0    0.04    0.05
 -25   5   0   -0.06    0.06
 -27  -5   0    0.11    0.06
 -27  -5   0    0.06    0.07
 -27  -5   0    0.07    0.06
 -27  -5   0    0.11    0.04
 -29  -5   0    0.16    0.05
 -29  -5   0    0.16    0.07
 -29  -5   0    0.20    0.04
 -29  -5   0    0.19    0.06
 -31  -5   0    0.71    0.08
 -31  -5   0    0.85    0.10
 -31  -5   0    0.48    0.05
 -31  -5   0    0.66    0.07
   0  -6   0    2.92    0.20
   0  -6   0    2.95    0.20
   2  -6   0    4.07    0.25
  -2  -6   0    4.43    0.27
  -2  -6   0    4.28    0.26
   2  -6   0    3.86    0.25
   4  -6   0    3.86    0.25
  -4  -6   0    4.14    0.25
  -4  -6   0    3.60    0.25
  -6  -6   0    5.33    0.31
  -6  -6   0    4.88    0.32
   6  -6   0    5.64    0.32
  -8  -6   0    1.10    0.14
   8  -6   0    1.08    0.13
  -8  -6   0    0.84    0.08
  -8  -6   0    0.99    0.14
  10  -6   0    1.86    0.18
 -10  -6   0    1.96    0.19
 -10  -6   0    2.41    0.22
  12  -6   0    1.31    0.15
 -12  -6   0    1.58    0.18
 -14  -6   0    0.18    0.07
 -14  -6   0    0.27    0.06
 -14   6   0    0.32    0.09
 -16  -6   0    0.28    0.09
 -16  -6   0    0.18    0.06
 -16  -6   0    0.26    0.06
 -16  -6   0    0.33    0.11
 -16  -6   0    0.29    0.07
 -16  -6   0    0.22    0.07
 -16   6   0    0.23    0.08
 -18  -6   0    0.05    0.07
 -18  -6   0    0.02    0.04
 -18  -6   0    0.05    0.05
 -18  -6   0    0.02    0.09
 -18  -6   0    0.03    0.05
 -18  -6   0    0.00    0.05
 -18   6   0    0.00    0.07
 -20  -6   0    0.22    0.06
 -20  -6   0    0.21    0.07
 -20  -6   0    0.22    0.07
 -20  -6   0    0.28    0.11
 -20  -6   0    0.23    0.06
 -20  -6   0    0.12    0.07
 -20   6   0    0.10    0.07
 -22  -6   0    0.49    0.10
 -22  -6   0    0.46    0.08
 -22  -6   0    0.68    0.10
 -22  -6   0    0.51    0.07
 -22   6   0    0.66    0.11
 -24  -6   0    0.08    0.06
 -24  -6   0    0.04    0.04
 -24  -6   0    0.03    0.05
 -24  -6   0    0.02    0.05
 -24   6   0    0.05    0.06
 -26  -6   0    0.15    0.07
 -26  -6   0    0.06    0.04
 -26  -6   0    0.04    0.05
 -26  -6   0    0.04    0.05
 -28  -6   0   -0.01    0.05
 -28  -6   0    0.08    0.04
 -28  -6   0    0.07    0.03
 -28  -6   0    0.12    0.05
 -30  -6   0    0.01    0.04
 -30  -6   0    0.05    0.03
 -30  -6   0    0.03    0.03
  -1  -7   0    3.03    0.22
   1  -7   0    3.06    0.22
  -1  -7   0    3.14    0.23
  -3  -7   0    3.45    0.25
  -3  -7   0    3.66    0.26
   3  -7   0    3.85    0.25
  -5  -7   0    0.80    0.14
  -5  -7   0    1.27    0.15
  -7   7   0    1.38    0.14
  -7   7   0    1.26    0.14
   7   7   0    1.36    0.13
  -9  -7   0    2.74    0.24
  -9  -7   0    2.63    0.17
  -9   7   0    2.82    0.22
  -9   7   0    2.42    0.17
  -9   7   0    2.87    0.22
 -11  -7   0    1.82    0.20
 -11  -7   0    1.74    0.17
 -11  -7   0    1.84    0.15
 -11   7   0    1.57    0.16
 -11   7   0    1.76    0.13
 -11   7   0    1.89    0.17
 -13  -7   0    1.42    0.15
 -13  -7   0    1.24    0.12
 -13  -7   0    1.34    0.14
 -13  -7   0    1.35    0.17
 -13   7   0    1.14    0.14
 -15  -7   0    0.11    0.05
 -15  -7   0    0.20    0.08
 -15  -7   0    0.07    0.06
 -15  -7   0    0.11    0.09
 -15   7   0    0.15    0.07
 -17  -7   0    0.78    0.14
 -17  -7   0    0.77    0.12
 -17  -7   0    0.72    0.09
 -17  -7   0    0.86    0.10
 -17   7   0    0.76    0.12
 -19  -7   0    0.10    0.05
 -19  -7   0    0.14    0.09
 -19  -7   0    0.14    0.06
 -19  -7   0    0.13    0.05
 -19  -7   0    0.07    0.06
 -19   7   0    0.06    0.06
 -21  -7   0    0.00    0.05
 -21  -7   0    0.06    0.05
 -21  -7   0   -0.04    0.05
 -21  -7   0    0.02    0.04
 -21  -7   0   -0.03    0.04
 -21  -7   0   -0.05    0.07
 -21   7   0   -0.03    0.05
 -23  -7   0    0.02    0.05
 -23  -7   0    0.00    0.03
 -23  -7   0   -0.02    0.05
 -23  -7   0    0.01    0.04
 -23  -7   0   -0.04    0.07
 -25  -7   0    0.14    0.04
 -25  -7   0    0.09    0.05
 -25  -7   0    0.05    0.04
 -25  -7   0    0.03    0.05
 -27  -7   0    0.05    0.03
 -27  -7   0    0.09    0.05
   0  -8   0    1.65    0.18
   0   8   0    1.86    0.16
  -2  -8   0    1.00    0.14
   2  -8   0    1.20    0.15
   2   8   0    1.28    0.14
  -2   8   0    1.19    0.13
  -2   8   0    1.03    0.14
  -4  -8   0    0.25    0.09
  -4   8   0    0.08    0.06
  -4   8   0    0.16    0.08
   4   8   0    0.17    0.07
  -6  -8   0    0.55    0.11
   6   8   0    0.68    0.10
  -6   8   0    0.59    0.10
  -6   8   0    0.32    0.09
  -8  -8   0    0.20    0.08
  -8   8   0    0.36    0.08
  -8   8   0    0.47    0.11
  -8   8   0    0.37    0.08
   8   8   0    0.40    0.08
 -10  -8   0    0.42    0.11
 -10   8   0    0.46    0.10
  10   8   0    0.45    0.08
 -10   8   0    0.65    0.10
 -10   8   0    0.56    0.07
 -12  -8   0    0.12    0.08
 -12  -8   0    0.08    0.07
  12   8   0    0.31    0.07
 -12   8   0    0.21    0.07
 -14  -8   0    0.03    0.06
 -14  -8   0    0.06    0.08
 -14  -8   0    0.02    0.06
 -14   8   0    0.02    0.05
  14   8   0    0.04    0.05
 -16  -8   0    0.31    0.08
 -16  -8   0    0.46    0.11
 -16  -8   0    0.28    0.07
 -16   8   0    0.37    0.08
  16   8   0    0.29    0.07
 -18  -8   0    0.07    0.08
 -18  -8   0    0.11    0.06
 -18  -8   0    0.07    0.05
 -18   8   0    0.06    0.05
  18   8   0    0.03    0.05
 -20  -8   0    0.11    0.07
 -20  -8   0   -0.01    0.05
 -20  -8   0    0.03    0.04
  20   8   0    0.05    0.05
 -20   8   0    0.02    0.05
 -22  -8   0    0.12    0.07
 -22  -8   0    0.15    0.06
  22   8   0    0.08    0.04
 -24  -8   0    0.03    0.04
  24   8   0    0.06    0.04
  -1  -9   0    0.17    0.08
   1  -9   0    0.12    0.08
  -1   9   0    0.19    0.08
   1   9   0    0.11    0.08
   1   9   0    0.11    0.06
  -1   9   0    0.19    0.06
  -3  -9   0    0.24    0.09
  -3   9   0    0.30    0.08
   3   9   0    0.40    0.08
  -3   9   0    0.30    0.08
  -5  -9   0    0.21    0.09
  -5   9   0    0.32    0.07
  -5   9   0    0.59    0.09
   5   9   0    0.72    0.10
  -7  -9   0    0.26    0.09
  -7   9   0    0.28    0.06
  -7   9   0    0.19    0.06
   7   9   0    0.19    0.06
  -7   9   0    0.20    0.08
  -9  -9   0    0.10    0.08
   9   9   0    0.05    0.05
  -9   9   0    0.00    0.05
  -9   9   0    0.07    0.04
 -11  -9   0    0.53    0.10
 -11  -9   0    0.69    0.12
 -11   9   0    0.67    0.09
  11   9   0    0.37    0.07
 -13  -9   0    0.14    0.07
 -13  -9   0    0.26    0.07
  13   9   0    0.28    0.07
 -15  -9   0    0.03    0.06
 -15  -9   0    0.04    0.05
  15   9   0    0.11    0.05
 -15   9   0    0.09    0.05
 -17  -9   0    0.17    0.07
 -17  -9   0    0.38    0.07
 -17  -9   0    0.10    0.05
 -17   9   0    0.31    0.06
  17   9   0    0.33    0.06
 -19  -9   0    0.07    0.05
 -19  -9   0    0.08    0.04
 -19  -9   0    0.07    0.06
  19   9   0    0.07    0.04
 -21  -9   0    0.10    0.04
 -21  -9   0    0.15    0.06
  21   9   0    0.05    0.04
   0 -10   0    0.14    0.07
   0  10   0    0.14    0.06
   0  10   0    0.07    0.06
  -2 -10   0    0.06    0.06
  -2  10   0    0.04    0.05
  -2  10   0    0.15    0.06
   2  10   0    0.00    0.05
   2  10   0    0.08    0.05
  -4 -10   0   -0.04    0.06
  -4  10   0    0.06    0.05
  -4  10   0    0.12    0.05
   4  10   0    0.11    0.05
   4  10   0    0.08    0.07
  -6 -10   0    0.03    0.06
  -6  10   0    0.04    0.04
   6  10   0   -0.01    0.04
  -6  10   0    0.04    0.03
  -8 -10   0    0.07    0.06
  -8  10   0    0.03    0.04
   8  10   0    0.01    0.04
 -10 -10   0    0.05    0.05
 -10 -10   0    0.02    0.05
 -10  10   0    0.00    0.04
  10  10   0    0.05    0.04
 -12 -10   0    0.08    0.05
 -12 -10   0    0.11    0.06
 -12  10   0    0.12    0.04
  12  10   0    0.07    0.04
 -14 -10   0   -0.01    0.04
 -14 -10   0    0.02    0.04
 -14  10   0    0.00    0.03
  14  10   0    0.03    0.04
 -16 -10   0    0.04    0.03
 -16 -10   0    0.04    0.04
  16  10   0   -0.02    0.03
   1  11   0    0.16    0.04
  -1  11   0    0.11    0.03
  -1  11   0    0.08    0.04
   1  11   0    0.14    0.04
   3  11   0   -0.01    0.03
   3  11   0    0.05    0.04
  -3  11   0    0.06    0.03
   5  11   0    0.01    0.04
   5  11   0    0.03    0.03
 -34   0   1    0.20    0.04
 -32   0   1   -0.03    0.03
 -30   0   1    0.04    0.05
 -30   0   1    0.01    0.04
 -28   0   1    0.02    0.06
 -28   0   1    0.03    0.04
 -26   0   1    0.13    0.07
 -26   0   1    0.14    0.06
 -26   0   1    0.21    0.08
 -24   0   1    0.08    0.07
 -24   0   1    0.07    0.07
 -22   0   1    0.01    0.05
 -20   0   1    0.04    0.05
 -20   0   1   -0.06    0.04
 -18   0   1    0.44    0.07
 -18   0   1    0.35    0.07
 -16   0   1   16.97    0.77
 -16   0   1   17.30    0.80
 -14   0   1    0.89    0.09
 -14   0   1    0.72    0.09
 -12   0   1    8.83    0.41
 -12   0   1    9.09    0.40
 -12   0   1    9.21    0.43
 -12   0   1    8.60    0.49
 -10   0   1    2.69    0.15
 -10   0   1    2.56    0.14
 -10   0   1    2.67    0.14
  -8   0   1   18.37    0.77
  -8   0   1   18.78    0.79
  -8   0   1   18.53    0.83
  -6   0   1    0.06    0.02
  -6   0   1    0.04    0.02
  -6   0   1    0.03    0.02
  -4   0   1    2.30    0.14
  -4   0   1    2.21    0.15
  -4   0   1    2.20    0.15
  -2   0   1    0.04    0.01
   0   0  -1    0.82    0.04
  -4   0  -1    3.40    0.16
  -4   0  -1    3.19    0.15
  -6   0  -1    0.79    0.06
  -6   0  -1    0.76    0.06
  -8   0  -1   29.73    1.25
  -8   0  -1   29.42    1.30
 -10   0  -1    2.67    0.15
 -10   0  -1    2.55    0.14
 -12   0  -1    1.36    0.13
 -12   0  -1    1.19    0.10
 -12   0  -1    1.28    0.11
 -14   0  -1    4.25    0.24
 -14   0  -1    3.95    0.22
 -14   0  -1    4.56    0.28
 -16   0  -1    0.05    0.04
 -16   0  -1    0.09    0.06
 -16   0  -1    0.07    0.04
 -18   0  -1    0.01    0.05
 -18   0  -1    0.00    0.04
 -20   0  -1    0.62    0.10
 -22   0  -1    1.58    0.17
 -24   0  -1    0.05    0.05
 -26   0  -1    1.27    0.12
 -28   0  -1    0.41    0.07
 -35  -1   1    0.08    0.03
 -35  -1   1    0.11    0.04
 -33  -1   1    0.12    0.06
 -33  -1   1    0.15    0.05
 -33  -1   1    0.14    0.04
 -33   1   1    0.09    0.04
 -31  -1   1    0.06    0.04
 -31  -1   1    0.01    0.05
 -31  -1   1   -0.03    0.06
 -31   1   1    0.04    0.04
 -29  -1   1    0.47    0.10
 -29  -1   1    0.74    0.11
 -29  -1   1    0.85    0.09
 -29   1   1    0.62    0.09
 -27  -1   1    0.13    0.06
 -27  -1   1    0.17    0.07
 -27  -1   1    0.16    0.06
 -27   1   1    0.10    0.06
 -25  -1   1    0.55    0.08
 -25  -1   1    0.78    0.11
 -25  -1   1    0.76    0.11
 -25   1   1    0.78    0.10
 -23  -1   1    0.65    0.10
 -23  -1   1    0.67    0.11
 -23  -1   1    0.63    0.11
 -23   1   1    0.53    0.10
 -21  -1   1    0.47    0.09
 -21  -1   1    0.56    0.09
 -21   1   1    0.42    0.09
 -19  -1   1    0.30    0.07
 -19  -1   1    0.50    0.08
 -19   1   1    0.24    0.07
 -17  -1   1   11.46    0.56
 -17  -1   1   11.44    0.54
 -17   1   1   11.25    0.56
 -15  -1   1   64.43    2.78
 -15  -1   1   61.43    2.69
 -15  -1   1   63.55    3.23
 -15   1   1   66.32    2.79
 -15   1   1   61.23    2.67
 -13  -1   1   69.70    2.97
 -13  -1   1   70.44    3.57
 -13  -1   1   69.47    3.07
 -13   1   1   71.08    3.07
 -13   1   1   70.71    2.95
 -11  -1   1   67.86    2.76
 -11  -1   1   64.78    3.43
 -11  -1   1   68.42    2.85
 -11  -1   1   65.91    2.95
 -11   1   1   70.25    2.95
 -11   1   1   69.49    2.84
  -9  -1   1  188.46    7.32
  -9  -1   1  179.29    7.84
  -9  -1   1  182.59    7.84
  -9  -1   1  189.08    7.58
   9  -1  -1  168.12    7.82
  -9   1   1  185.27    7.84
  -9   1   1  181.60    7.57
  -7  -1   1  129.62    5.10
  -7  -1   1  126.19    5.45
  -7  -1   1  129.17    5.28
  -7  -1   1  125.97    5.46
  -7   1   1  125.97    5.45
  -7   1   1  125.55    5.26
  -7   1   1  123.49    5.08
  -5  -1   1  139.92    5.67
  -5  -1   1  139.58    5.86
  -5  -1   1  132.60    5.89
  -5   1   1  134.11    5.86
  -5   1   1  135.03    5.46
  -3  -1   1  187.25    7.36
  -3  -1   1  186.49    7.62
  -3  -1   1  181.68    7.88
  -3  -1   1  179.86    7.89
  -3   1   1  181.58    7.36
  -3   1   1  183.40    7.88
  -1  -1   1  111.42    4.34
  -1  -1   1  109.85    4.64
   1  -1  -1  102.18    4.64
  -1  -1  -1   60.41    2.55
   1  -1   1   59.30    2.38
   1  -1   1   56.55    2.56
  -1  -1  -1   59.87    2.47
   1  -1   1   58.44    2.56
  -1  -1  -1   60.52    2.56
   3  -1   1  183.85    7.58
  -3  -1  -1  191.90    8.12
  -3  -1  -1  189.53    7.86
   3  -1   1  191.69    8.14
   3  -1   1  188.16    8.13
   5  -1   1  228.45   10.02
  -5  -1  -1  237.56   10.01
  -5   1  -1  231.40   10.02
  -5   1  -1  234.91    9.69
  -7  -1  -1  103.13    4.28
  -7  -1  -1  105.00    4.42
  -7   1  -1  103.85    4.42
  -7   1  -1   97.40    4.26
  -9  -1  -1   10.10    0.48
  -9  -1  -1   10.53    0.47
  -9   1  -1   10.46    0.48
  -9   1  -1   10.07    0.45
 -11  -1  -1   12.55    0.57
 -11  -1  -1   12.08    0.67
 -11  -1  -1   12.37    0.56
 -11   1  -1   12.04    0.57
 -11   1  -1   12.38    0.54
 -13  -1  -1   21.71    0.99
 -13  -1  -1   22.31    0.96
 -13  -1  -1   21.97    1.15
 -13   1  -1   21.21    0.99
 -13   1  -1   21.79    0.94
 -15  -1  -1    4.35    0.28
 -15  -1  -1    3.42    0.22
 -15  -1  -1    3.86    0.23
 -15   1  -1    4.10    0.23
 -17  -1  -1    2.46    0.20
 -17  -1  -1    2.06    0.15
 -17  -1  -1    2.13    0.16
 -17   1  -1    2.05    0.16
 -19  -1  -1    0.42    0.10
 -19  -1  -1    0.34    0.08
 -19  -1  -1    0.24    0.07
 -19   1  -1    0.30    0.07
 -21  -1  -1    1.74    0.18
 -21  -1  -1    2.29    0.19
 -21   1  -1    2.19    0.20
 -23  -1  -1    0.28    0.09
 -23  -1  -1    0.33    0.08
 -25  -1  -1    0.02    0.04
 -25  -1  -1   -0.02    0.05
 -25  -1  -1    0.01    0.06
 -27  -1  -1    1.75    0.16
 -27  -1  -1    1.98    0.17
 -27  -1  -1    1.70    0.13
 -29  -1  -1    0.14    0.05
 -29  -1  -1    0.10    0.06
 -29  -1  -1    0.17    0.06
 -31  -1  -1    0.78    0.10
 -34  -2   1    0.11    0.05
 -34  -2   1    0.03    0.04
 -34  -2   1    0.03    0.03
 -34   2   1    0.01    0.03
 -32  -2   1    0.08    0.05
 -32  -2   1    0.13    0.06
 -32  -2   1    0.14    0.04
 -32   2   1    0.08    0.05
 -30  -2   1    0.26    0.08
 -30  -2   1    0.23    0.05
 -30  -2   1    0.18    0.06
 -30   2   1    0.23    0.06
 -28  -2   1    0.50    0.07
 -28  -2   1    0.50    0.10
 -28  -2   1    0.50    0.09
 -28   2   1    0.60    0.09
 -26  -2   1    0.08    0.06
 -26  -2   1    0.13    0.07
 -26  -2   1    0.16    0.05
 -26   2   1    0.09    0.06
 -24  -2   1    0.12    0.05
 -24  -2   1    0.08    0.06
 -24  -2   1    0.06    0.06
 -24   2   1    0.19    0.07
 -22  -2   1    0.05    0.06
 -22  -2   1   -0.05    0.05
 -22  -2   1    0.12    0.07
 -20  -2   1    1.06    0.13
 -20  -2   1    1.10    0.13
 -20   2   1    0.82    0.12
 -18  -2   1    0.78    0.10
 -18  -2   1    0.71    0.10
 -18  -2   1    0.85    0.13
 -18   2   1    0.54    0.09
 -16  -2   1    4.75    0.28
 -16  -2   1    4.96    0.28
 -16  -2   1    5.05    0.33
 -16   2   1    5.27    0.29
 -14  -2   1    0.12    0.05
 -14  -2   1    0.20    0.07
 -14  -2   1    0.15    0.05
 -14   2   1    0.09    0.04
 -12  -2   1   12.57    0.57
 -12  -2   1   12.05    0.55
 -12  -2   1   12.14    0.57
 -12  -2   1   11.07    0.65
 -12   2   1   12.15    0.57
 -10  -2   1   11.34    0.49
 -10  -2   1   11.37    0.52
 -10  -2   1   10.23    0.60
 -10  -2   1   11.44    0.52
 -10  -2   1   11.61    0.51
 -10   2   1   10.95    0.52
  -8  -2   1    4.28    0.20
  -8  -2   1    4.08    0.21
   8  -2  -1    3.80    0.18
  -8  -2   1    4.06    0.21
  -8  -2   1    3.85    0.20
   6  -2  -1    1.76    0.09
   6  -2  -1    1.74    0.12
  -6  -2   1    1.78    0.11
  -6  -2   1    1.98    0.11
  -6  -2   1    1.68    0.11
  -6  -2   1    1.72    0.11
  -4  -2   1    1.31    0.08
  -4  -2   1    1.38    0.08
   4  -2  -1    1.23    0.07
  -4  -2   1    1.30    0.08
  -4  -2   1    1.16    0.08
   4  -2  -1    1.29    0.09
  -2  -2   1    3.58    0.15
   2  -2  -1    3.10    0.17
  -2  -2   1    3.19    0.15
   2  -2  -1    3.15    0.16
  -2  -2   1    3.41    0.16
  -2  -2   1    3.15    0.16
   0  -2   1   97.99    4.27
   0  -2  -1   96.45    4.27
   0  -2   1   96.32    4.12
   0  -2   1  102.30    3.98
   0  -2  -1   99.73    4.13
   0  -2  -1  100.22    4.28
   0  -2   1  101.03    4.28
   2  -2   1   13.40    0.56
  -2  -2  -1   14.35    0.62
   2  -2   1   13.74    0.62
  -2  -2  -1   14.05    0.62
   2  -2   1   14.05    0.61
  -2  -2  -1   13.71    0.60
   4  -2   1   21.17    0.92
  -4  -2  -1   19.01    0.91
  -4  -2  -1   20.43    0.88
   4  -2   1   20.88    0.90
  -4  -2  -1   21.72    0.91
   6  -2   1   10.07    0.50
  -6  -2  -1   10.73    0.48
  -6  -2  -1   10.64    0.50
  -6  -2  -1   10.98    0.49
   6  -2   1   10.31    0.43
   6  -2   1   11.15    0.48
  -8  -2  -1    4.81    0.25
   8  -2   1    4.80    0.25
  -8  -2  -1    5.27    0.24
  -8  -2  -1    4.22    0.28
   8  -2   1    4.75    0.22
  -8  -2  -1    4.52    0.24
  10  -2   1    5.73    0.27
 -10  -2  -1    5.58    0.29
 -10  -2  -1    5.55    0.28
 -10  -2  -1    5.68    0.34
 -12  -2  -1    8.12    0.48
 -12  -2  -1    8.87    0.41
 -12  -2  -1    8.26    0.41
 -14  -2  -1    3.51    0.26
 -14  -2  -1    3.78    0.22
 -14  -2  -1    3.42    0.21
 -14   2  -1    3.93    0.22
 -16  -2  -1    2.31    0.17
 -16  -2  -1    2.45    0.21
 -16  -2  -1    2.44    0.17
 -18  -2  -1    0.06    0.06
 -18  -2  -1    0.18    0.06
 -18  -2  -1    0.10    0.08
 -20  -2  -1    0.49    0.10
 -20  -2  -1    0.40    0.09
 -20  -2  -1    0.59    0.12
 -22  -2  -1    0.83    0.11
 -22  -2  -1    0.55    0.11
  22  -2   1    0.79    0.14
 -24  -2  -1    0.10    0.05
 -24  -2  -1    0.04    0.06
 -24  -2  -1    0.09    0.07
 -26  -2  -1    0.56    0.09
 -26  -2  -1    0.46    0.09
 -26  -2  -1    0.61    0.08
 -28  -2  -1    0.10    0.05
 -28  -2  -1    0.08    0.05
 -28  -2  -1    0.12    0.07
 -30  -2  -1    0.44    0.08
 -30  -2  -1    0.48    0.09
 -30  -2  -1    0.52    0.07
 -32  -2  -1    0.37    0.07
 -32  -2  -1    0.33    0.06
 -34  -2  -1    0.06    0.04
 -35  -3   1    0.03    0.03
 -33  -3   1    0.00    0.04
 -33  -3   1   -0.01    0.04
 -33  -3   1   -0.02    0.03
 -31  -3   1    0.06    0.04
 -31  -3   1    0.08    0.05
 -31  -3   1    0.00    0.05
 -31   3   1    0.05    0.05
 -29  -3   1    0.30    0.08
 -29  -3   1    0.20    0.05
 -29  -3   1    0.16    0.06
 -29   3   1    0.08    0.06
 -27  -3   1    0.40    0.09
 -27  -3   1    0.42    0.09
 -27  -3   1    0.45    0.07
 -27   3   1    0.19    0.07
 -25  -3   1    0.26    0.08
 -25  -3   1    0.22    0.09
 -25  -3   1    0.20    0.06
 -25  -3   1    0.30    0.08
 -25   3   1    0.32    0.08
 -23  -3   1    0.14    0.06
 -23  -3   1    0.18    0.07
 -23  -3   1    0.17    0.05
 -23   3   1    0.13    0.07
  21  -3  -1    0.29    0.10
 -21  -3   1    0.12    0.07
 -21  -3   1    0.16    0.07
 -21  -3   1    0.17    0.07
  19  -3  -1    0.82    0.14
 -19  -3   1    0.94    0.13
 -19  -3   1    0.79    0.12
 -19  -3   1    1.03    0.15
 -17  -3   1    3.39    0.24
 -17  -3   1    3.59    0.24
 -17  -3   1    4.45    0.29
  17  -3  -1    3.87    0.26
 -15  -3   1    5.13    0.29
  15  -3  -1    4.82    0.30
 -15  -3   1    4.93    0.28
 -15  -3   1    5.08    0.33
 -13  -3   1    8.99    0.45
 -13  -3   1    9.16    0.46
 -13  -3   1    9.16    0.53
  13  -3  -1    9.20    0.48
 -13  -3   1    9.25    0.46
  11  -3  -1    0.04    0.05
 -11  -3   1   -0.03    0.04
 -11  -3   1    0.01    0.03
 -11  -3   1    0.05    0.05
 -11  -3   1    0.08    0.04
  -9  -3   1    8.79    0.41
   9  -3  -1    9.89    0.46
  -9  -3   1    9.33    0.43
  -9  -3   1    9.10    0.44
  -9  -3   1    8.78    0.51
  -9  -3   1    9.27    0.45
  -7  -3   1   11.02    0.49
  -7  -3   1   10.11    0.46
   7  -3  -1    9.96    0.47
  -7  -3   1   10.17    0.57
  -7  -3   1   10.62    0.48
   7  -3  -1   10.76    0.50
  -7  -3   1   10.57    0.49
   5  -3  -1    1.78    0.12
  -5  -3   1    1.66    0.11
  -5  -3   1    1.70    0.11
   5  -3  -1    1.72    0.10
  -5  -3   1    1.49    0.10
  -3  -3   1   26.72    1.18
  -3  -3   1   27.76    1.14
   3  -3  -1   28.24    1.23
  -3  -3   1   28.09    1.23
  -3  -3   1   27.45    1.23
   3  -3  -1   28.58    1.22
   1  -3  -1   50.14    2.15
   1  -3  -1   54.85    2.24
  -1  -3   1   47.61    2.15
  -1  -3   1   50.40    2.24
  -1  -3   1   53.14    2.08
  -1  -3   1   51.92    2.24
   1  -3  -1   51.92    2.24
  -1  -3  -1   22.05    0.95
  -1  -3  -1   22.63    0.99
  -1  -3  -1   21.78    0.99
   1  -3   1   22.30    0.99
   1  -3   1   22.32    0.98
  -3  -3  -1   26.00    1.13
   3  -3   1   27.03    1.16
  -3  -3  -1   26.88    1.18
  -3  -3  -1   26.64    1.17
   3  -3   1   25.93    1.18
  -5  -3  -1   27.91    1.25
   5  -3   1   27.98    1.23
  -5  -3  -1   27.57    1.24
  -5  -3  -1   28.77    1.21
   5  -3   1   28.11    1.25
   7  -3   1    7.41    0.37
  -7  -3  -1    6.87    0.42
  -7  -3  -1    7.02    0.35
  -7  -3  -1    7.12    0.36
   7  -3   1    7.55    0.34
  -7  -3  -1    7.29    0.35
  -9  -3  -1    3.65    0.20
   9  -3   1    3.58    0.22
  -9  -3  -1    3.61    0.21
  -9  -3  -1    3.65    0.21
  -9  -3  -1    3.44    0.24
 -11  -3  -1    5.68    0.32
 -11  -3  -1    6.46    0.33
 -11  -3  -1    6.06    0.38
  11  -3   1    6.54    0.34
 -13  -3  -1    9.04    0.54
 -13  -3  -1    9.13    0.46
  13  -3   1    9.27    0.48
 -13  -3  -1    9.28    0.45
  15  -3   1    2.11    0.19
 -15  -3  -1    2.07    0.18
 -15  -3  -1    1.60    0.19
 -15  -3  -1    2.11    0.17
 -17  -3  -1    1.36    0.17
  17  -3   1    1.04    0.14
 -17  -3  -1    0.95    0.12
 -17  -3  -1    1.00    0.12
 -19  -3  -1    0.61    0.11
 -19  -3  -1    0.61    0.13
  19  -3   1    0.82    0.14
 -21  -3  -1    0.30    0.08
  21  -3   1    0.37    0.11
 -21  -3  -1    0.43    0.12
 -21  -3  -1    0.28    0.08
 -23  -3  -1    0.71    0.11
 -23  -3  -1    0.85    0.11
 -23  -3  -1    0.62    0.08
 -23  -3  -1    0.76    0.12
 -25  -3  -1    0.42    0.09
 -25  -3  -1    0.47    0.10
 -25  -3  -1    0.33    0.06
 -25  -3  -1    0.24    0.07
 -27  -3  -1    1.65    0.17
 -27  -3  -1    1.75    0.16
 -27  -3  -1    1.57    0.15
 -27  -3  -1    1.57    0.13
 -29  -3  -1    0.23    0.05
 -29  -3  -1    0.29    0.07
 -29  -3  -1    0.20    0.06
 -31  -3  -1    0.28    0.06
 -31  -3  -1    0.30    0.06
 -31  -3  -1    0.20    0.04
 -33  -3  -1    0.09    0.04
 -33  -3  -1    0.06    0.05
 -34  -4   1    0.03    0.03
 -34  -4   1    0.02    0.03
 -32  -4   1    0.07    0.03
 -32  -4   1    0.00    0.04
 -32  -4   1    0.10    0.04
 -30  -4   1    0.07    0.04
 -30  -4   1    0.06    0.05
 -30  -4   1   -0.02    0.04
 -30  -4   1   -0.12    0.06
 -30   4   1    0.03    0.05
 -28  -4   1    0.23    0.09
 -28  -4   1    0.31    0.08
 -28  -4   1    0.33    0.06
 -28  -4   1    0.19    0.06
 -28   4   1    0.30    0.07
 -26  -4   1    1.17    0.14
 -26  -4   1    1.45    0.15
 -26  -4   1    1.40    0.12
 -26  -4   1    1.34    0.16
 -26   4   1    0.98    0.13
 -24  -4   1    0.09    0.07
 -24  -4   1    0.09    0.06
 -24  -4   1    0.05    0.04
 -24  -4   1    0.01    0.06
 -24   4   1    0.13    0.07
 -22  -4   1    0.49    0.09
 -22  -4   1    0.30    0.08
 -22  -4   1    0.46    0.07
 -22  -4   1    0.44    0.10
 -22  -4   1    0.40    0.06
 -22   4   1    0.46    0.10
 -20  -4   1    0.10    0.07
 -20  -4   1    0.20    0.07
 -20  -4   1    0.27    0.09
 -18  -4   1    0.54    0.11
 -18  -4   1    0.90    0.12
  18  -4  -1    0.68    0.12
 -18  -4   1    0.90    0.14
 -16  -4   1    3.79    0.25
 -16  -4   1    4.29    0.30
  16  -4  -1    4.12    0.28
 -16  -4   1    4.14    0.27
  14  -4  -1    2.25    0.21
 -14  -4   1    2.82    0.20
 -14  -4   1    1.97    0.19
 -14  -4   1    2.61    0.21
 -14  -4   1    2.32    0.19
  12  -4  -1    4.03    0.25
 -12  -4   1    3.78    0.23
 -12  -4   1    4.18    0.28
 -12  -4   1    3.96    0.24
 -12  -4   1    3.80    0.25
  10  -4  -1    7.49    0.38
 -10  -4   1    6.74    0.37
 -10  -4   1    6.67    0.42
 -10  -4   1    7.39    0.38
 -10  -4   1    7.15    0.36
  -8  -4   1    8.45    0.41
  -8  -4   1    8.25    0.42
  -8  -4   1    8.25    0.48
   8  -4  -1    8.79    0.43
  -8  -4   1    8.68    0.43
   6  -4  -1    6.59    0.33
  -6  -4   1    6.36    0.37
  -6  -4   1    6.28    0.31
  -6  -4   1    5.97    0.33
  -6  -4   1    6.37    0.33
  -4  -4   1   17.18    0.80
   4  -4  -1   17.35    0.79
  -4  -4   1   17.67    0.80
  -4  -4   1   17.73    0.76
   4  -4  -1   17.34    0.80
  -2  -4   1    9.54    0.47
   2  -4  -1   10.29    0.47
  -2  -4   1   10.04    0.47
   2  -4  -1    9.73    0.47
   0  -4  -1   12.90    0.61
   0  -4   1   13.18    0.61
   0  -4   1   13.28    0.62
   0  -4  -1   13.50    0.62
  -2  -4  -1    5.91    0.28
   2  -4   1    6.11    0.31
  -2  -4  -1    6.13    0.31
  -2  -4  -1    5.69    0.30
   2  -4   1    6.15    0.30
   4  -4   1   14.73    0.66
  -4  -4  -1   14.55    0.67
   4  -4   1   14.36    0.67
  -4  -4  -1   14.79    0.68
  -4  -4  -1   14.90    0.65
  -4  -4  -1   13.55    0.77
  -6  -4  -1   31.33    1.64
  -6  -4  -1   30.25    1.42
  -6  -4  -1   31.51    1.36
   6  -4   1   32.74    1.42
  -6  -4  -1   31.21    1.41
   6  -4   1   32.26    1.39
  -8  -4  -1   30.62    1.39
  -8  -4  -1   31.68    1.34
  -8  -4  -1   28.79    1.38
  -8  -4  -1   29.87    1.60
   8  -4   1   32.80    1.39
 -10  -4  -1    2.09    0.17
 -10  -4  -1    2.29    0.19
 -10  -4  -1    2.20    0.16
  10  -4   1    2.57    0.18
 -10  -4  -1    2.33    0.16
 -12  -4  -1    3.66    0.23
 -12  -4  -1    3.54    0.27
  12  -4   1    3.64    0.24
 -12  -4  -1    3.72    0.23
 -14  -4  -1    1.28    0.14
  14  -4   1    1.67    0.17
 -14  -4  -1    1.75    0.19
 -14  -4  -1    1.81    0.17
 -16  -4  -1    1.83    0.18
 -16  -4  -1    1.41    0.15
  16  -4   1    1.62    0.17
 -16  -4  -1    1.40    0.18
  18  -4   1    4.87    0.31
 -18  -4  -1    4.07    0.27
 -18  -4  -1    3.64    0.25
 -18  -4  -1    4.33    0.32
 -20  -4  -1    0.40    0.07
 -20  -4  -1    0.40    0.08
 -20  -4  -1    0.28    0.08
 -20  -4  -1    0.39    0.05
 -20  -4  -1    0.34    0.11
 -22  -4  -1    0.05    0.04
 -22  -4  -1    0.07    0.06
 -22  -4  -1    0.06    0.07
 -22  -4  -1    0.09    0.06
 -24  -4  -1    0.28    0.07
 -24  -4  -1    0.12    0.08
 -24  -4  -1    0.18    0.07
 -24  -4  -1    0.22    0.06
 -26  -4  -1    0.09    0.07
 -26  -4  -1    0.07    0.04
 -26  -4  -1    0.12    0.06
 -26  -4  -1    0.11    0.06
 -28  -4  -1    0.13    0.06
 -28  -4  -1    0.21    0.06
 -28  -4  -1    0.30    0.08
 -28  -4  -1    0.12    0.04
 -30  -4  -1    0.03    0.03
 -30  -4  -1    0.03    0.04
 -30  -4  -1    0.04    0.04
 -30  -4  -1    0.04    0.06
 -32  -4  -1   -0.01    0.04
 -32  -4  -1    0.00    0.03
 -32  -4  -1   -0.02    0.03
 -33  -5   1    0.09    0.03
 -31  -5   1    0.02    0.04
 -31  -5   1    0.11    0.06
 -31  -5   1    0.01    0.03
 -31  -5   1    0.02    0.03
 -29  -5   1    0.07    0.05
 -29  -5   1   -0.01    0.04
 -29  -5   1    0.04    0.03
 -29  -5   1    0.01    0.06
 -29   5   1   -0.04    0.04
 -27  -5   1    0.25    0.05
 -27  -5   1    0.38    0.08
 -27  -5   1    0.31    0.07
 -27  -5   1    0.33    0.10
 -27   5   1    0.23    0.07
 -25  -5   1    0.54    0.09
 -25  -5   1    0.61    0.11
 -25  -5   1    0.51    0.09
 -25  -5   1    0.51    0.07
 -25   5   1    0.59    0.10
 -23  -5   1    0.82    0.11
 -23  -5   1    0.68    0.11
 -23  -5   1    0.72    0.12
 -23  -5   1    0.72    0.09
 -23   5   1    0.59    0.10
 -21  -5   1   -0.07    0.06
 -21  -5   1   -0.01    0.04
 -21  -5   1    0.03    0.06
 -21  -5   1    0.02    0.04
 -21  -5   1   -0.06    0.05
 -21   5   1   -0.07    0.06
 -19  -5   1   -0.02    0.07
 -19  -5   1    0.09    0.05
 -19  -5   1    0.05    0.04
 -19  -5   1    0.06    0.06
 -19  -5   1    0.02    0.05
 -19   5   1    0.14    0.07
  17  -5  -1    3.66    0.26
 -17  -5   1    3.58    0.24
 -17  -5   1    3.12    0.22
 -17  -5   1    3.30    0.29
 -15  -5   1    0.31    0.08
 -15  -5   1    0.39    0.10
  15  -5  -1    0.28    0.09
 -15  -5   1    0.34    0.09
 -13  -5   1    3.07    0.24
  13  -5  -1    3.46    0.24
 -13  -5   1    3.39    0.26
 -13  -5   1    3.54    0.23
 -13  -5   1    3.33    0.24
 -11  -5   1    0.85    0.11
 -11  -5   1    0.90    0.13
  11  -5  -1    0.74    0.11
 -11  -5   1    1.02    0.13
 -11  -5   1    0.72    0.11
  -9  -5   1    1.62    0.14
  -9  -5   1    1.50    0.15
   9  -5  -1    1.48    0.15
  -9  -5   1    1.60    0.15
   7  -5  -1    3.01    0.20
  -7  -5   1    2.82    0.19
  -7  -5   1    2.96    0.20
  -5  -5   1    4.87    0.27
   5  -5  -1    4.52    0.27
  -5  -5   1    4.85    0.28
   3  -5  -1   12.92    0.60
  -3  -5   1   12.36    0.61
  -3  -5   1   12.79    0.61
   3  -5  -1   12.50    0.61
   1  -5  -1    8.20    0.39
   1  -5  -1    7.77    0.39
  -1  -5   1    7.52    0.39
  -1  -5   1    7.40    0.39
  -1  -5  -1    6.26    0.33
   1  -5   1    6.29    0.33
   1  -5   1    6.50    0.33
  -1  -5  -1    6.07    0.33
   3  -5   1    5.13    0.28
  -3  -5  -1    5.33    0.30
  -3  -5  -1    5.10    0.29
   3  -5   1    5.43    0.29
  -5  -5  -1    8.78    0.47
   5  -5   1    9.32    0.44
   5  -5   1    8.88    0.46
  -5  -5  -1    9.38    0.46
  -7  -5  -1    8.36    0.41
  -7  -5  -1    7.65    0.44
  -7  -5  -1    7.92    0.48
   7  -5   1    8.93    0.43
  -7  -5  -1    8.14    0.39
  -7  -5  -1    8.69    0.44
   9  -5   1    3.63    0.24
  -9  -5  -1    3.68    0.28
  -9  -5  -1    3.76    0.25
  -9  -5  -1    3.96    0.23
  -9  -5  -1    3.77    0.25
 -11  -5  -1    2.37    0.21
  11  -5   1    2.48    0.19
 -11  -5  -1    2.64    0.23
 -11  -5  -1    2.50    0.19
 -13  -5  -1    7.39    0.42
 -13  -5  -1    7.40    0.47
 -13  -5  -1    6.59    0.39
  13  -5   1    7.54    0.41
 -15  -5  -1    0.18    0.09
  15  -5   1    0.44    0.10
 -15  -5  -1    0.30    0.08
 -15  -5  -1    0.41    0.10
 -17  -5  -1    0.41    0.07
 -17  -5  -1    0.50    0.09
 -17  -5  -1    0.39    0.09
 -17  -5  -1    0.36    0.07
 -17  -5  -1    0.47    0.12
 -19  -5  -1    0.27    0.09
 -19  -5  -1    0.08    0.06
 -19  -5  -1    0.14    0.05
 -19  -5  -1    0.22    0.11
 -19  -5  -1    0.07    0.05
 -19  -5  -1    0.17    0.10
 -19  -5  -1    0.20    0.07
 -21  -5  -1    0.17    0.07
 -21  -5  -1    0.30    0.08
 -21  -5  -1    0.30    0.06
 -21  -5  -1    0.20    0.08
 -23  -5  -1    0.64    0.08
 -23  -5  -1    0.55    0.09
 -23  -5  -1    0.58    0.09
 -23  -5  -1    0.48    0.11
 -25  -5  -1    0.21    0.07
 -25  -5  -1    0.17    0.08
 -25  -5  -1    0.24    0.05
 -25  -5  -1    0.17    0.06
 -27  -5  -1    0.29    0.05
 -27  -5  -1    0.23    0.08
 -27  -5  -1    0.13    0.06
 -27  -5  -1    0.26    0.06
 -29  -5  -1    0.29    0.06
 -29  -5  -1    0.33    0.05
 -29  -5  -1    0.28    0.08
 -29  -5  -1    0.35    0.07
 -31  -5  -1    0.09    0.04
 -31  -5  -1    0.14    0.03
 -31  -5  -1    0.06    0.05
 -31  -5  -1    0.06    0.04
 -30  -6   1    0.06    0.03
 -30  -6   1    0.10    0.05
 -30  -6   1    0.10    0.04
 -30  -6   1    0.05    0.04
 -28  -6   1    0.06    0.06
 -28  -6   1    0.14    0.04
 -28  -6   1    0.08    0.04
 -28  -6   1    0.14    0.05
 -28   6   1    0.07    0.05
 -26  -6   1    0.25    0.06
 -26  -6   1    0.19    0.05
 -26  -6   1    0.45    0.08
 -26  -6   1    0.33    0.08
 -26   6   1    0.26    0.07
 -24  -6   1    0.18    0.05
 -24  -6   1    0.25    0.07
 -24  -6   1    0.36    0.08
 -24  -6   1    0.14    0.07
 -24   6   1    0.21    0.07
 -22  -6   1    0.01    0.04
 -22  -6   1    0.05    0.04
 -22  -6   1    0.01    0.05
 -22  -6   1   -0.01    0.06
 -22  -6   1    0.06    0.06
 -22   6   1   -0.01    0.06
 -20  -6   1    0.76    0.12
 -20  -6   1    0.41    0.12
 -20  -6   1    0.53    0.09
 -20  -6   1    0.76    0.09
 -20  -6   1    0.62    0.10
 -20  -6   1    0.90    0.10
 -20   6   1    0.65    0.11
 -18  -6   1    0.25    0.10
 -18  -6   1    0.10    0.05
 -18  -6   1    0.10    0.06
 -18  -6   1    0.06    0.05
 -18  -6   1    0.00    0.07
 -18  -6   1   -0.03    0.05
 -18   6   1    0.04    0.07
 -16  -6   1   -0.01    0.08
 -16  -6   1   -0.04    0.05
 -16  -6   1   -0.03    0.06
 -16  -6   1    0.06    0.05
 -16   6   1   -0.03    0.06
 -14  -6   1    0.23    0.06
  12  -6  -1    2.92    0.21
 -12  -6   1    2.44    0.23
 -12  -6   1    2.48    0.23
 -10  -6   1    0.58    0.11
 -10  -6   1    0.40    0.09
  10  -6  -1    0.62    0.10
  -8  -6   1    7.06    0.42
   8  -6  -1    7.68    0.41
  -8  -6   1    7.84    0.42
  -6  -6   1    2.18    0.21
  -6  -6   1    2.81    0.20
   6  -6  -1    2.69    0.19
   4  -6  -1    2.34    0.19
  -4  -6   1    2.77    0.20
  -4  -6   1    3.84    0.22
  -2  -6   1    5.56    0.33
  -2  -6   1    5.51    0.33
   2  -6  -1    6.40    0.34
   2  -6  -1    6.26    0.34
   0  -6   1    3.86    0.24
   0  -6   1    3.97    0.24
   0  -6  -1    3.38    0.23
   0  -6  -1    4.43    0.25
  -2  -6  -1    1.95    0.17
   2  -6   1    1.55    0.15
  -2  -6  -1    1.42    0.14
   2  -6   1    1.75    0.15
  -4  -6  -1    9.39    0.51
   4  -6   1    9.60    0.50
  -4  -6  -1    9.91    0.50
  -6  -6  -1    0.34    0.08
  -6  -6  -1    0.35    0.09
   6  -6   1    0.29    0.08
  -8  -6  -1    1.33    0.17
   8  -6   1    1.92    0.18
  -8  -6  -1    1.84    0.18
 -10  -6  -1    1.62    0.18
  10  -6   1    1.58    0.17
  12  -6   1    2.44    0.22
 -14  -6  -1    0.22    0.06
 -14  -6  -1    0.21    0.07
 -14  -6  -1    0.22    0.10
 -14  -6  -1    0.16    0.08
 -14  -6  -1    0.19    0.07
 -14  -6  -1    0.17    0.10
 -14  -6  -1    0.22    0.07
 -14   6  -1    0.08    0.08
 -16  -6  -1    0.25    0.11
 -16  -6  -1    0.26    0.06
 -16  -6  -1    0.14    0.06
 -16  -6  -1    0.17    0.07
 -16  -6  -1    0.21    0.08
 -16  -6  -1    0.28    0.11
 -16  -6  -1    0.18    0.06
 -16   6  -1    0.31    0.09
 -18  -6  -1    0.00    0.09
 -18  -6  -1    0.07    0.06
 -18  -6  -1    0.06    0.05
 -18  -6  -1    0.01    0.05
 -18  -6  -1    0.13    0.07
 -18  -6  -1    0.06    0.05
 -18   6  -1    0.11    0.07
 -20  -6  -1    0.36    0.12
 -20  -6  -1    0.47    0.09
 -20  -6  -1    0.49    0.07
 -20  -6  -1    0.37    0.09
 -20  -6  -1    0.38    0.08
 -20  -6  -1    0.50    0.07
 -22  -6  -1    0.12    0.07
 -22  -6  -1    0.24    0.06
 -22  -6  -1    0.22    0.07
 -22  -6  -1    0.22    0.07
 -22  -6  -1    0.10    0.10
 -24  -6  -1    0.02    0.04
 -24  -6  -1   -0.01    0.06
 -24  -6  -1    0.05    0.05
 -24  -6  -1    0.00    0.03
 -26  -6  -1    0.11    0.04
 -26  -6  -1    0.06    0.05
 -26  -6  -1    0.09    0.06
 -26  -6  -1    0.05    0.04
 -28  -6  -1    0.18    0.06
 -28  -6  -1    0.16    0.05
 -28  -6  -1    0.11    0.03
 -28  -6  -1    0.12    0.04
 -30  -6  -1    0.07    0.03
 -30  -6  -1    0.03    0.02
 -29  -7   1    0.08    0.04
 -27  -7   1    0.07    0.05
 -27  -7   1    0.00    0.04
 -27  -7   1    0.03    0.03
 -27  -7   1    0.05    0.03
 -25  -7   1    0.16    0.04
 -25  -7   1    0.20    0.05
 -25  -7   1    0.09    0.05
 -25  -7   1    0.14    0.06
 -25   7   1    0.21    0.06
 -23  -7   1    0.02    0.06
 -23  -7   1    0.06    0.04
 -23  -7   1    0.15    0.05
 -23  -7   1    0.17    0.06
 -23   7   1    0.08    0.06
 -21  -7   1    0.05    0.09
 -21  -7   1    0.19    0.06
 -21  -7   1    0.11    0.07
 -21  -7   1    0.20    0.06
 -21  -7   1    0.10    0.05
 -21   7   1    0.10    0.07
 -19  -7   1   -0.02    0.04
 -19  -7   1    0.06    0.06
 -19  -7   1    0.03    0.05
 -19  -7   1    0.13    0.09
 -19   7   1    0.01    0.06
 -17  -7   1    0.62    0.09
 -17  -7   1    0.87    0.12
 -17  -7   1    0.64    0.09
 -17  -7   1    0.77    0.14
 -17   7   1    0.64    0.11
 -15  -7   1    0.22    0.06
 -15  -7   1    0.22    0.10
 -15  -7   1    0.36    0.08
 -15  -7   1    0.40    0.09
 -15   7   1    0.29    0.08
 -13  -7   1    0.35    0.10
 -13  -7   1    0.14    0.07
 -13  -7   1    0.36    0.07
 -13  -7   1    0.28    0.09
 -13   7   1    0.25    0.05
 -13   7   1    0.19    0.08
 -11  -7   1    0.87    0.12
 -11  -7   1    0.89    0.14
 -11  -7   1    0.79    0.10
 -11   7   1    0.69    0.11
 -11   7   1    0.98    0.10
 -11   7   1    0.79    0.12
  -9  -7   1    1.11    0.15
  -9  -7   1    1.12    0.11
  -9   7   1    1.03    0.14
  -9   7   1    1.08    0.13
  -9   7   1    1.06    0.12
  -7   7   1    0.59    0.10
  -7   7   1    0.55    0.10
   7   7  -1    0.62    0.09
   5  -7  -1    4.01    0.26
  -5  -7   1    3.62    0.27
  -5  -7   1    3.79    0.26
   3  -7  -1    2.57    0.20
  -3  -7   1    2.92    0.24
  -3  -7   1    2.39    0.23
   1  -7  -1    0.05    0.06
  -1  -7   1   -0.09    0.05
  -1  -7   1    0.13    0.07
  -1  -7  -1    1.74    0.18
   1  -7   1    1.11    0.14
  -1  -7  -1    1.31    0.15
   3  -7   1    3.66    0.25
  -3  -7  -1    3.78    0.25
  -3  -7  -1    3.38    0.26
  -5  -7  -1    0.37    0.10
  -5  -7  -1    0.33    0.09
   7   7   1    3.42    0.20
  -7   7  -1    3.47    0.26
  -7   7  -1    3.14    0.21
  -7   7  -1    2.98    0.20
  -9  -7  -1    1.30    0.17
  -9   7  -1    1.34    0.12
  -9   7  -1    1.44    0.15
  -9   7  -1    1.84    0.17
 -11  -7  -1    2.28    0.23
 -11  -7  -1    2.62    0.16
 -11  -7  -1    2.46    0.20
 -11  -7  -1    2.34    0.19
 -11   7  -1    2.67    0.21
 -11   7  -1    2.39    0.14
 -11   7  -1    2.77    0.20
 -13  -7  -1    0.45    0.09
 -13  -7  -1    0.38    0.11
 -13  -7  -1    0.49    0.08
 -13  -7  -1    0.57    0.11
 -13   7  -1    0.41    0.10
 -15  -7  -1    0.05    0.08
 -15  -7  -1    0.06    0.04
 -15  -7  -1    0.03    0.06
 -15  -7  -1    0.00    0.06
 -15   7  -1    0.00    0.06
 -17  -7  -1    0.00    0.04
 -17  -7  -1   -0.04    0.07
 -17  -7  -1    0.03    0.06
 -17  -7  -1    0.04    0.05
 -17  -7  -1   -0.03    0.04
 -17   7  -1   -0.01    0.06
 -19  -7  -1    0.07    0.05
 -19  -7  -1    0.12    0.09
 -19  -7  -1    0.24    0.08
 -19  -7  -1    0.20    0.05
 -19  -7  -1    0.13    0.05
 -19  -7  -1    0.11    0.06
 -21  -7  -1    0.43    0.09
 -21  -7  -1    0.43    0.07
 -21  -7  -1    0.47    0.08
 -21  -7  -1    0.35    0.07
 -21  -7  -1    0.39    0.11
 -23  -7  -1    0.18    0.07
 -23  -7  -1    0.09    0.05
 -23  -7  -1    0.15    0.04
 -23  -7  -1    0.19    0.09
 -23  -7  -1    0.16    0.06
 -25  -7  -1    0.30    0.05
 -25  -7  -1    0.40    0.08
 -25  -7  -1    0.40    0.06
 -27  -7  -1    0.04    0.03
 -27  -7  -1    0.10    0.05
  27   7   1    0.04    0.03
 -26  -8   1    0.01    0.04
 -24  -8   1   -0.05    0.04
  24   8  -1    0.02    0.04
 -22  -8   1   -0.01    0.05
 -22  -8   1    0.01    0.06
 -22   8   1   -0.01    0.04
  22   8  -1    0.05    0.04
 -20  -8   1    0.00    0.05
 -20  -8   1    0.02    0.04
 -20  -8   1   -0.03    0.07
 -20   8   1    0.05    0.05
  20   8  -1   -0.01    0.04
 -18  -8   1    0.15    0.07
 -18  -8   1    0.18    0.09
 -18  -8   1    0.17    0.06
 -18   8   1    0.14    0.06
  18   8  -1    0.20    0.06
 -16  -8   1    0.29    0.08
 -16  -8   1    0.25    0.09
 -16  -8   1    0.38    0.09
  16   8  -1    0.30    0.07
 -16   8   1    0.29    0.08
 -14  -8   1    0.53    0.09
 -14  -8   1    0.49    0.10
 -14  -8   1    0.58    0.12
 -14   8   1    0.47    0.09
  14   8  -1    0.41    0.07
 -12  -8   1    0.08    0.08
  12   8  -1   -0.04    0.04
 -12   8   1    0.05    0.04
 -12   8   1    0.06    0.06
 -10  -8   1    1.39    0.17
 -10   8   1    1.17    0.14
 -10   8   1    1.60    0.16
  10   8  -1    1.78    0.15
 -10   8   1    1.47    0.12
  -8  -8   1    1.48    0.18
  -8   8   1    1.37    0.16
   8   8  -1    1.23    0.13
  -8   8   1    1.34    0.14
  -8   8   1    1.65    0.15
  -6  -8   1    4.17    0.28
   6   8  -1    4.24    0.24
  -6   8   1    4.26    0.25
  -6   8   1    3.59    0.24
  -4  -8   1    0.50    0.11
   4   8  -1    0.52    0.09
  -4   8   1    0.80    0.12
  -4   8   1    0.69    0.12
  -2  -8   1    3.24    0.24
   2   8  -1    3.46    0.21
  -2   8   1    3.84    0.22
  -2   8   1    3.12    0.25
   0  -8  -1    5.29    0.34
   0  -8   1    6.07    0.35
   0   8  -1    5.15    0.29
   0   8  -1    6.27    0.35
   0   8   1    5.64    0.30
  -2  -8  -1    5.27    0.32
   2  -8   1    4.69    0.30
   2   8   1    4.52    0.27
  -2   8  -1    5.02    0.27
  -2   8  -1    5.19    0.30
  -4  -8  -1    0.22    0.09
  -4   8  -1    0.27    0.08
  -4   8  -1    0.34    0.09
   4   8   1    0.37    0.08
  -6  -8  -1    0.29    0.09
  -6   8  -1    0.35    0.10
   6   8   1    0.28    0.08
  -6   8  -1    0.31    0.08
  -6   8  -1    0.31    0.08
  -8  -8  -1    1.71    0.20
   8   8   1    2.09    0.17
  -8   8  -1    2.31    0.20
  -8   8  -1    2.33    0.19
  -8   8  -1    2.00    0.14
 -10  -8  -1    0.16    0.08
 -10   8  -1    0.19    0.04
 -10   8  -1    0.21    0.07
  10   8   1    0.16    0.06
 -10   8  -1    0.10    0.07
 -12  -8  -1    0.54    0.10
 -12  -8  -1    0.57    0.12
 -12   8  -1    0.64    0.10
  12   8   1    0.51    0.09
 -14  -8  -1    0.15    0.07
 -14  -8  -1    0.20    0.07
 -14  -8  -1    0.35    0.10
  14   8   1    0.26    0.07
 -14   8  -1    0.18    0.07
 -16  -8  -1   -0.01    0.07
 -16  -8  -1    0.08    0.06
 -16  -8  -1    0.11    0.06
  16   8   1    0.07    0.05
 -16   8  -1    0.06    0.06
 -18  -8  -1    0.05    0.06
 -18  -8  -1    0.01    0.04
 -18  -8  -1    0.11    0.08
  18   8   1   -0.09    0.04
 -20  -8  -1    0.24    0.09
 -20  -8  -1    0.13    0.06
  20   8   1    0.25    0.06
 -22  -8  -1    0.06    0.06
 -22  -8  -1    0.00    0.05
  22   8   1    0.01    0.04
 -24  -8  -1    0.07    0.04
  24   8   1   -0.01    0.03
 -21  -9   1    0.01    0.05
 -21  -9   1    0.04    0.04
  21   9  -1    0.02    0.03
 -19  -9   1    0.18    0.07
 -19  -9   1    0.19    0.06
 -19  -9   1    0.15    0.04
 -19   9   1    0.20    0.05
  19   9  -1    0.17    0.05
 -17  -9   1    0.02    0.06
 -17  -9   1   -0.02    0.04
 -17  -9   1   -0.09    0.05
  17   9  -1   -0.03    0.04
 -17   9   1    0.05    0.04
 -15  -9   1    0.16    0.06
 -15  -9   1    0.13    0.07
  15   9  -1    0.32    0.06
 -15   9   1    0.28    0.06
 -13  -9   1    0.06    0.07
 -13  -9   1    0.06    0.06
  13   9  -1    0.09    0.05
 -13   9   1    0.10    0.05
 -11  -9   1    0.27    0.09
  11   9  -1    0.23    0.06
 -11   9   1    0.23    0.07
  -9  -9   1    0.01    0.06
  -9   9   1   -0.01    0.04
  -9   9   1    0.04    0.05
   9   9  -1   -0.02    0.05
  -7  -9   1    0.02    0.06
   7   9  -1   -0.01    0.05
  -7   9   1    0.03    0.05
  -7   9   1    0.03    0.07
  -7   9   1    0.02    0.05
  -5  -9   1    0.95    0.14
  -5   9   1    1.11    0.13
  -5   9   1    1.00    0.12
   5   9  -1    0.75    0.10
  -3  -9   1    0.47    0.11
  -3   9   1    0.47    0.10
   3   9  -1    0.51    0.09
  -3   9   1    0.55    0.09
   1  -9  -1   -0.07    0.06
  -1  -9   1    0.03    0.07
  -1   9   1    0.07    0.06
  -1   9   1    0.05    0.07
   1   9  -1    0.07    0.08
   1   9  -1    0.04    0.06
   1  -9   1    0.06    0.07
  -1  -9  -1    0.01    0.07
  -1   9  -1    0.02    0.05
   1   9   1    0.11    0.06
  -1   9  -1    0.11    0.07
  -3  -9  -1    0.59    0.11
   3   9   1    0.77    0.11
  -3   9  -1    0.68    0.10
  -3   9  -1    0.82    0.11
  -5  -9  -1    0.11    0.07
   5   9   1    0.02    0.05
  -5   9  -1    0.13    0.06
  -5   9  -1    0.04    0.07
  -5   9  -1    0.05    0.05
  -7  -9  -1    0.27    0.09
  -7   9  -1    0.54    0.10
   7   9   1    0.28    0.07
  -7   9  -1    0.31    0.06
  -7   9  -1    0.19    0.07
  -9  -9  -1    0.08    0.07
   9   9   1    0.08    0.05
  -9   9  -1    0.12    0.06
 -11  -9  -1    0.16    0.07
 -11  -9  -1    0.14    0.07
 -11   9  -1    0.16    0.06
  11   9   1    0.17    0.06
 -13  -9  -1    0.09    0.07
 -13  -9  -1    0.09    0.06
 -13   9  -1    0.23    0.06
  13   9   1   -0.03    0.04
 -15  -9  -1    0.06    0.06
 -15  -9  -1    0.01    0.05
  15   9   1    0.04    0.04
 -17  -9  -1   -0.07    0.05
 -17  -9  -1   -0.02    0.05
 -17  -9  -1   -0.08    0.03
  17   9   1   -0.01    0.04
 -19  -9  -1    0.05    0.05
 -19  -9  -1    0.05    0.05
  19   9   1    0.06    0.04
 -16 -10   1    0.14    0.05
 -16 -10   1    0.03    0.04
  16  10  -1    0.08    0.04
 -14 -10   1   -0.01    0.04
 -14 -10   1    0.02    0.04
 -14  10   1    0.02    0.03
  14  10  -1    0.03    0.03
 -12 -10   1   -0.04    0.05
 -12 -10   1    0.07    0.05
 -12  10   1    0.05    0.04
  12  10  -1    0.01    0.04
 -10 -10   1    0.05    0.06
 -10  10   1    0.03    0.04
  10  10  -1    0.02    0.04
  -8 -10   1   -0.01    0.05
  -8  10   1    0.05    0.04
   8  10  -1    0.03    0.04
  -6 -10   1    0.11    0.07
   6  10  -1    0.08    0.07
  -6  10   1    0.08    0.05
   6  10  -1    0.05    0.05
  -6  10   1    0.13    0.04
  -4 -10   1    0.17    0.07
  -4  10   1    0.12    0.05
   4  10  -1    0.07    0.07
   4  10  -1    0.24    0.06
  -4  10   1    0.27    0.06
  -2 -10   1    0.52    0.10
  -2  10   1    0.55    0.09
   2  10  -1    0.67    0.10
   2  10  -1    0.48    0.08
  -2  10   1    0.46    0.08
   0 -10   1    0.22    0.07
   0  10  -1    0.15    0.06
   0  10   1    0.17    0.07
   0  10  -1    0.11    0.05
   0  10   1    0.21    0.06
  -2 -10  -1    0.38    0.09
   2  10   1    0.41    0.08
  -2  10  -1    0.50    0.08
  -2  10  -1    0.64    0.09
   2  10   1    0.54    0.10
  -4 -10  -1    0.13    0.07
  -4  10  -1    0.12    0.07
  -4  10  -1    0.09    0.04
   4  10   1    0.02    0.05
  -4  10  -1    0.06    0.05
  -6 -10  -1   -0.02    0.05
  -6  10  -1    0.01    0.04
   6  10   1    0.13    0.05
  -8 -10  -1    0.05    0.06
  -8  10  -1    0.09    0.04
   8  10   1    0.16    0.05
 -10 -10  -1    0.09    0.06
 -10 -10  -1    0.02    0.05
 -10  10  -1    0.15    0.05
  10  10   1    0.08    0.04
 -12 -10  -1    0.17    0.06
 -12 -10  -1    0.12    0.05
  12  10   1    0.19    0.05
 -14 -10  -1    0.07    0.05
 -14 -10  -1    0.08    0.04
  14  10   1    0.05    0.04
 -16 -10  -1    0.14    0.05
  -5 -11   1    0.12    0.05
   5  11  -1    0.04    0.04
   3  11  -1    0.05    0.03
   3  11  -1    0.02    0.03
  -3  11   1    0.00    0.03
  -1  11   1   -0.01    0.03
   1  11  -1   -0.01    0.03
   1  11  -1    0.03    0.03
  -1  11   1    0.00    0.03
   1  11   1    0.07    0.04
   1  11   1   -0.02    0.03
   3  11   1    0.03    0.04
   3  11   1   -0.02    0.03
   5  11   1    0.09    0.04
 -36   0   2    0.07    0.03
 -34   0   2    0.06    0.04
 -32   0   2    0.05    0.05
 -32   0   2    0.04    0.04
 -30   0   2    0.00    0.04
 -30   0   2    0.01    0.05
 -28   0   2    0.92    0.13
 -28   0   2    0.92    0.11
 -28   0   2    1.15    0.14
 -26   0   2    0.19    0.07
 -26   0   2    0.16    0.07
 -26   0   2    0.14    0.06
 -24   0   2    0.05    0.07
 -24   0   2   -0.03    0.05
 -22   0   2    4.59    0.29
 -20   0   2    1.57    0.16
 -20   0   2    1.15    0.12
 -18   0   2    0.32    0.07
 -18   0   2    0.49    0.08
 -16   0   2    2.28    0.17
 -16   0   2    2.53    0.15
 -14   0   2    4.56    0.24
 -14   0   2    4.73    0.23
 -14   0   2    4.99    0.26
 -12   0   2   32.51    1.38
 -12   0   2   31.79    1.44
 -12   0   2   32.79    1.33
 -10   0   2    4.64    0.21
 -10   0   2    4.26    0.22
 -10   0   2    4.37    0.23
  -8   0   2  703.52   28.62
  -8   0   2  654.09   28.63
  -8   0   2  649.55   27.64
  -8   0   2  656.46   26.73
  -4   0   2    1.81    0.10
  -4   0   2    2.01    0.10
  -4   0   2    1.97    0.10
  -2   0   2   18.62    0.80
  -2   0   2   19.14    0.77
   2   0  -2   19.26    0.83
   0   0   2   16.62    0.71
   0   0   2   16.56    0.69
   0   0  -2   17.69    0.74
  -2   0  -2   30.75    1.29
  -4   0  -2   31.51    1.37
  -6   0  -2   12.11    0.54
  -6   0  -2   12.53    0.55
  -8   0  -2   12.29    0.53
  -8   0  -2   11.88    0.55
 -10   0  -2    1.45    0.10
 -10   0  -2    1.53    0.10
 -12   0  -2    3.25    0.22
 -12   0  -2    3.21    0.18
 -12   0  -2    3.00    0.18
 -14   0  -2   53.80    2.79
 -14   0  -2   52.85    2.40
 -14   0  -2   57.27    2.32
 -16   0  -2    1.60    0.14
 -16   0  -2    1.46    0.16
 -16   0  -2    1.47    0.14
 -18   0  -2    0.13    0.07
 -18   0  -2    0.05    0.05
 -18   0  -2    0.07    0.05
 -35  -1   2    0.04    0.03
 -35  -1   2    0.11    0.05
 -35   1   2    0.02    0.03
 -33  -1   2   -0.05    0.04
 -33  -1   2    0.10    0.04
 -33  -1   2   -0.05    0.05
 -33   1   2    0.05    0.04
 -31  -1   2    0.25    0.07
 -31  -1   2    0.14    0.05
 -31  -1   2    0.19    0.07
 -31   1   2    0.15    0.05
 -29  -1   2    0.08    0.06
 -29  -1   2    0.14    0.05
 -29  -1   2    0.26    0.08
 -29   1   2    0.22    0.06
 -27  -1   2   -0.01    0.04
 -27  -1   2    0.02    0.05
 -27  -1   2   -0.05    0.06
 -27   1   2    0.04    0.05
 -25  -1   2    0.62    0.10
 -25  -1   2    0.72    0.12
 -25  -1   2    0.80    0.10
 -25   1   2    0.72    0.10
 -23  -1   2    0.47    0.10
 -23  -1   2    0.76    0.11
 -23   1   2    0.62    0.11
 -21  -1   2    0.30    0.08
 -21  -1   2    0.43    0.09
 -21   1   2    0.59    0.10
 -19  -1   2    0.61    0.10
 -19  -1   2    0.70    0.10
 -19   1   2    0.70    0.10
 -17  -1   2    0.82    0.11
 -17  -1   2    0.68    0.09
 -17   1   2    0.74    0.10
 -15  -1   2    0.79    0.09
 -15  -1   2    0.87    0.10
 -15  -1   2    0.89    0.09
 -15   1   2    0.96    0.09
 -15   1   2    0.95    0.10
 -13  -1   2    0.05    0.03
 -13  -1   2   -0.05    0.03
 -13  -1   2    0.06    0.03
 -13  -1   2    0.06    0.05
 -13   1   2    0.04    0.04
 -13   1   2    0.00    0.02
 -13   1   2    0.00    0.03
 -11  -1   2   10.06    0.44
 -11  -1   2   10.41    0.46
 -11  -1   2   10.17    0.48
 -11  -1   2    9.95    0.47
 -11  -1   2    9.51    0.55
 -11   1   2   10.55    0.48
 -11   1   2    9.60    0.43
 -11   1   2   10.51    0.45
  -9  -1   2    5.52    0.26
  -9  -1   2    5.82    0.26
  -9  -1   2    5.16    0.27
  -9  -1   2    5.10    0.26
  -9   1   2    5.75    0.24
  -9   1   2    5.70    0.25
  -9   1   2    5.43    0.27
  -7  -1   2   12.67    0.57
  -7  -1   2   13.16    0.54
  -7  -1   2   12.58    0.58
  -7   1   2   12.96    0.55
  -7   1   2   12.63    0.58
  -7   1   2   13.33    0.53
  -5  -1   2    7.44    0.33
  -5  -1   2    7.30    0.34
  -5  -1   2    7.32    0.32
  -5   1   2    7.37    0.32
  -5   1   2    7.79    0.31
   5   1  -2    7.38    0.34
  -5   1   2    7.33    0.34
  -3  -1   2    5.01    0.23
  -3  -1   2    4.84    0.22
  -3  -1   2    4.86    0.21
  -3  -1   2    4.92    0.23
  -3   1   2    4.96    0.21
  -3   1   2    4.85    0.21
  -3   1   2    4.79    0.23
  -1  -1   2    8.05    0.32
  -1  -1   2    7.82    0.33
   1  -1  -2    7.70    0.34
  -1  -1   2    7.55    0.34
  -1   1   2    7.21    0.33
   1  -1   2    3.14    0.15
   1  -1   2    3.39    0.15
  -1  -1  -2    3.33    0.15
   1  -1   2    3.35    0.14
  -1  -1  -2    2.67    0.15
   3  -1   2    4.66    0.22
  -3  -1  -2    4.96    0.23
   3  -1   2    4.92    0.24
   3  -1   2    4.99    0.21
   3  -1   2    5.08    0.23
  -3  -1  -2    5.16    0.23
   5  -1   2    1.96    0.12
  -5  -1  -2    2.22    0.12
  -5  -1  -2    2.24    0.12
  -5   1  -2    2.25    0.12
  -5   1  -2    2.09    0.11
  -7  -1  -2   12.90    0.58
  -7  -1  -2   12.87    0.56
  -7   1  -2   12.84    0.58
  -7   1  -2   12.46    0.55
  -9  -1  -2    7.46    0.34
  -9  -1  -2    7.42    0.34
  -9  -1  -2    6.95    0.41
  -9   1  -2    7.00    0.34
  -9   1  -2    6.81    0.32
 -11  -1  -2    3.78    0.21
 -11  -1  -2    4.27    0.22
 -11  -1  -2    3.55    0.25
 -11   1  -2    4.17    0.20
 -11   1  -2    3.94    0.21
 -13  -1  -2    1.60    0.13
 -13  -1  -2    1.36    0.12
 -13  -1  -2    1.26    0.14
 -13   1  -2    1.36    0.12
 -13   1  -2    1.25    0.10
 -15  -1  -2    4.06    0.29
 -15  -1  -2    4.50    0.24
 -15  -1  -2    4.48    0.25
 -15   1  -2    4.10    0.24
 -17  -1  -2    4.39    0.26
 -17  -1  -2    4.59    0.32
 -17  -1  -2    4.96    0.27
 -17   1  -2    4.50    0.27
 -19  -1  -2    0.85    0.11
 -19  -1  -2    0.92    0.14
 -19   1  -2    0.95    0.12
 -21  -1  -2    0.27    0.08
 -23  -1  -2    0.24    0.08
 -23  -1  -2    0.21    0.07
 -25  -1  -2    0.25    0.08
 -25  -1  -2    0.41    0.08
 -27  -1  -2    1.21    0.13
 -27  -1  -2    1.17    0.13
 -29  -1  -2    0.43    0.08
 -36  -2   2    0.08    0.04
 -36  -2   2    0.07    0.03
 -34  -2   2    0.02    0.03
 -34  -2   2    0.03    0.04
 -34  -2   2    0.05    0.05
 -34   2   2    0.01    0.03
 -32  -2   2    0.05    0.06
 -32  -2   2   -0.03    0.04
 -32  -2   2    0.01    0.03
 -32   2   2   -0.04    0.04
 -30  -2   2    0.20    0.07
 -30  -2   2    0.34    0.06
 -30  -2   2    0.24    0.07
 -30   2   2    0.16    0.06
 -28  -2   2    0.27    0.06
 -28  -2   2    0.31    0.08
 -28  -2   2    0.42    0.09
 -28   2   2    0.35    0.08
 -26  -2   2    0.23    0.08
 -26  -2   2    0.20    0.06
 -26  -2   2    0.09    0.06
 -26   2   2    0.16    0.07
 -24  -2   2    0.89    0.13
 -24  -2   2    1.15    0.11
 -24  -2   2    1.22    0.14
 -24   2   2    1.11    0.13
 -22  -2   2    0.38    0.09
 -22  -2   2    0.59    0.11
 -22   2   2    0.39    0.09
 -20  -2   2    3.57    0.23
 -20  -2   2    3.07    0.22
 -20   2   2    3.02    0.22
 -18  -2   2    2.73    0.19
 -18  -2   2    2.68    0.19
 -18   2   2    2.91    0.20
 -16  -2   2    1.25    0.13
 -16  -2   2    1.53    0.14
 -16  -2   2    1.30    0.15
 -16   2   2    1.54    0.14
 -14  -2   2   13.75    0.74
 -14  -2   2   14.13    0.64
 -14  -2   2   13.36    0.62
 -14  -2   2   14.23    0.64
 -14  -2   2   12.28    0.59
 -14   2   2   12.79    0.63
 -12  -2   2    3.84    0.21
 -12  -2   2    3.77    0.20
 -12  -2   2    3.90    0.21
 -12  -2   2    4.09    0.26
 -12  -2   2    3.76    0.22
 -12   2   2    4.03    0.22
 -10  -2   2    4.34    0.22
 -10  -2   2    4.03    0.21
 -10  -2   2    3.98    0.22
 -10  -2   2    4.47    0.22
 -10  -2   2    3.96    0.26
 -10   2   2    4.44    0.23
  -8  -2   2    9.79    0.45
  -8  -2   2    9.54    0.42
  -8  -2   2    9.65    0.45
  -8  -2   2    9.59    0.44
  -8  -2   2    9.75    0.44
  -8   2   2    9.88    0.40
  -8   2   2    9.74    0.46
  -8   2   2    9.60    0.42
  -6  -2   2    0.51    0.05
  -6  -2   2    0.54    0.06
   6  -2  -2    0.48    0.06
  -6  -2   2    0.53    0.05
  -6  -2   2    0.49    0.05
   6  -2  -2    0.61    0.04
  -6   2   2    0.61    0.03
  -6   2   2    0.63    0.04
  -4  -2   2    9.44    0.37
  -4  -2   2    8.27    0.39
  -4  -2   2    8.38    0.39
  -4  -2   2    8.90    0.38
   4  -2  -2    8.35    0.38
   4  -2  -2    8.24    0.39
  -4   2   2    8.21    0.36
  -4   2   2    8.16    0.35
  -2  -2   2  136.42    5.70
   2  -2  -2  140.11    5.91
  -2  -2   2  144.70    5.51
   2  -2  -2  138.70    5.90
  -2  -2   2  137.50    5.91
  -2  -2   2  137.45    5.90
  -2   2   2  124.83    5.70
   0  -2  -2    1.49    0.10
   0  -2  -2    1.53    0.09
   0  -2   2    1.68    0.08
   0  -2   2    1.50    0.08
   0  -2   2    1.48    0.09
   0  -2  -2    1.51    0.09
   0  -2   2    1.55    0.09
   2  -2   2  100.50    4.24
   2  -2   2   99.13    3.94
  -2  -2  -2   97.28    4.10
  -2  -2  -2   97.48    4.23
  -2  -2  -2   98.78    4.25
   2  -2   2   95.90    4.24
   4  -2   2   31.76    1.35
  -4  -2  -2   29.56    1.34
  -4  -2  -2   30.95    1.34
   4  -2   2   30.45    1.24
  -4  -2  -2   31.19    1.31
   4  -2   2   31.33    1.36
  -4  -2  -2   30.20    1.36
  -4  -2  -2   31.49    1.35
  -6  -2  -2   28.79    1.24
  -6  -2  -2   28.06    1.21
   6  -2   2   27.64    1.14
   6  -2   2   28.62    1.25
   6  -2   2   28.04    1.23
  -8  -2  -2   16.18    0.74
  -8  -2  -2   16.87    0.73
   8  -2   2   16.59    0.76
   8  -2   2   16.24    0.73
  10  -2   2   14.45    0.65
 -10  -2  -2   14.10    0.78
 -10  -2  -2   14.75    0.65
  10  -2   2   14.21    0.68
 -10  -2  -2   14.54    0.66
 -12  -2  -2    1.69    0.13
 -12  -2  -2    1.90    0.16
 -12  -2  -2    1.79    0.13
  12  -2   2    1.45    0.14
 -14  -2  -2   37.50    1.69
 -14  -2  -2   38.44    1.64
 -14  -2  -2   37.62    1.97
 -16  -2  -2    6.46    0.41
  16  -2   2    6.08    0.36
 -16  -2  -2    6.16    0.34
 -16  -2  -2    6.13    0.34
 -18  -2  -2    2.23    0.23
 -18  -2  -2    2.27    0.19
  18  -2   2    2.11    0.21
 -20  -2  -2    0.14    0.09
 -20  -2  -2    0.34    0.08
  20  -2   2    0.35    0.11
 -22  -2  -2    1.31    0.14
 -22  -2  -2    1.22    0.14
 -24  -2  -2    0.09    0.06
 -24  -2  -2    0.05    0.05
 -24  -2  -2    0.13    0.05
 -26  -2  -2    0.82    0.11
 -26  -2  -2    0.68    0.11
 -28  -2  -2    0.20    0.07
 -28  -2  -2    0.32    0.07
 -30  -2  -2    1.03    0.11
 -30  -2  -2    1.03    0.11
 -32  -2  -2    0.59    0.08
 -32  -2  -2    0.59    0.08
 -35  -3   2    0.21    0.05
 -35  -3   2    0.21    0.04
 -35  -3   2    0.28    0.06
 -35   3   2    0.23    0.04
 -33  -3   2    0.05    0.03
 -33  -3   2    0.05    0.04
 -33  -3   2    0.00    0.05
 -33   3   2   -0.04    0.04
 -31  -3   2   -0.03    0.04
 -31  -3   2    0.04    0.04
 -31  -3   2    0.01    0.05
 -31   3   2    0.01    0.05
 -29  -3   2    0.01    0.05
 -29  -3   2   -0.01    0.04
 -29  -3   2    0.10    0.07
 -29   3   2   -0.03    0.05
 -27  -3   2    0.00    0.05
 -27  -3   2    0.02    0.06
 -27  -3   2    0.09    0.05
 -27   3   2    0.21    0.07
 -25  -3   2    0.59    0.11
 -25  -3   2    0.46    0.07
 -25  -3   2    0.72    0.12
 -25  -3   2    0.50    0.10
 -25   3   2    0.37    0.08
 -23  -3   2    0.38    0.07
 -23  -3   2    0.28    0.08
 -23  -3   2    0.49    0.10
 -23   3   2    0.43    0.09
 -21  -3   2    0.24    0.08
 -21  -3   2    0.22    0.07
  21  -3  -2    0.39    0.10
 -21  -3   2    0.29    0.09
  19  -3  -2    0.27    0.09
 -19  -3   2    0.35    0.09
 -19  -3   2    0.29    0.07
 -17  -3   2    2.85    0.20
  17  -3  -2    2.40    0.22
 -17  -3   2    2.59    0.19
  15  -3  -2    2.35    0.21
 -15  -3   2    2.05    0.16
 -15  -3   2    2.55    0.20
 -15  -3   2    2.82    0.18
 -15  -3   2    2.38    0.17
 -13  -3   2    1.91    0.15
 -13  -3   2    1.94    0.17
  13  -3  -2    2.23    0.19
 -13  -3   2    2.06    0.15
 -13  -3   2    1.93    0.14
 -13  -3   2    1.95    0.14
 -11  -3   2    2.41    0.19
 -11  -3   2    2.45    0.16
 -11  -3   2    2.70    0.16
 -11  -3   2    2.61    0.17
  11  -3  -2    2.61    0.18
 -11  -3   2    2.47    0.16
  -9  -3   2    4.91    0.26
  -9  -3   2    4.93    0.26
  -9  -3   2    5.09    0.25
  -9  -3   2    5.11    0.27
   9  -3  -2    5.00    0.27
  -9  -3   2    4.90    0.30
  -7  -3   2    1.94    0.12
  -7  -3   2    1.75    0.12
   7  -3  -2    1.98    0.13
  -7  -3   2    1.74    0.12
  -7  -3   2    1.80    0.11
  -5  -3   2   13.47    0.60
   5  -3  -2   12.79    0.59
  -5  -3   2   12.86    0.58
   5  -3  -2   13.12    0.61
  -5  -3   2   13.38    0.56
   3  -3  -2   23.54    1.00
  -3  -3   2   23.07    0.94
   3  -3  -2   22.00    1.01
  -3  -3   2   23.61    1.01
  -3  -3   2   22.78    1.01
  -3  -3   2   22.73    0.97
  -3   3   2   21.98    0.95
  -3   3   2   22.13    0.92
   1  -3  -2   42.35    1.85
  -1  -3   2   43.95    1.85
  -1  -3   2   42.85    1.72
   1  -3  -2   42.15    1.85
   1  -3  -2   42.27    1.77
  -1  -3   2   40.44    1.77
  -1  -3   2   44.51    1.85
  -1   3   2   40.13    1.77
   1  -3   2   39.02    1.71
  -1  -3  -2   39.06    1.65
   1  -3   2   38.89    1.58
   1  -3   2   38.53    1.71
  -1  -3  -2   38.83    1.72
  -1  -3  -2   40.34    1.71
   3  -3   2    4.62    0.24
  -3  -3  -2    4.48    0.23
   3  -3   2    4.66    0.23
  -3  -3  -2    4.51    0.23
  -3  -3  -2    4.95    0.25
  -5  -3  -2    8.53    0.40
   5  -3   2    8.42    0.39
  -5  -3  -2    7.89    0.39
   5  -3   2    8.49    0.41
  -5  -3  -2    8.26    0.41
  -5  -3  -2    8.51    0.38
  -7  -3  -2    8.95    0.44
  -7  -3  -2    9.95    0.45
  -7  -3  -2    8.71    0.45
   7  -3   2    9.32    0.46
   7  -3   2    9.53    0.43
  -9  -3  -2   27.79    1.46
   9  -3   2   27.99    1.23
  -9  -3  -2   28.00    1.25
  -9  -3  -2   27.99    1.22
   9  -3   2   27.56    1.26
 -11  -3  -2   10.99    0.51
 -11  -3  -2    9.93    0.60
 -11  -3  -2   10.61    0.50
  11  -3   2   10.35    0.52
 -13  -3  -2    5.83    0.32
  13  -3   2    5.80    0.33
 -13  -3  -2    5.75    0.32
 -13  -3  -2    6.15    0.39
 -15  -3  -2    1.55    0.15
 -15  -3  -2    1.78    0.19
  15  -3   2    1.56    0.16
 -15  -3  -2    1.88    0.17
 -17  -3  -2    1.79    0.18
 -17  -3  -2    2.11    0.22
  17  -3   2    1.93    0.19
 -19  -3  -2    0.76    0.14
 -19  -3  -2    0.70    0.11
 -19  -3  -2    0.62    0.10
  19  -3   2    0.62    0.12
 -21  -3  -2    0.43    0.09
 -21  -3  -2    0.48    0.09
 -21  -3  -2    0.47    0.12
 -21  -3  -2    0.46    0.07
 -23  -3  -2    0.81    0.13
 -23  -3  -2    1.00    0.13
 -23  -3  -2    1.12    0.13
 -23  -3  -2    0.84    0.09
 -25  -3  -2    0.98    0.13
 -25  -3  -2    0.89    0.09
 -25  -3  -2    0.81    0.11
 -25  -3  -2    0.79    0.11
 -27  -3  -2    0.13    0.06
 -27  -3  -2    0.12    0.05
 -27  -3  -2    0.18    0.05
 -27  -3  -2    0.28    0.09
 -29  -3  -2    0.32    0.07
 -29  -3  -2    0.43    0.08
 -31  -3  -2    0.05    0.04
 -31  -3  -2    0.03    0.05
 -33  -3  -2    0.08    0.04
 -34  -4   2    0.05    0.03
 -34  -4   2    0.06    0.04
 -34  -4   2    0.01    0.03
 -32  -4   2    0.11    0.05
 -32  -4   2    0.13    0.04
 -32  -4   2    0.23    0.06
 -32   4   2    0.19    0.05
 -30  -4   2    0.06    0.06
 -30  -4   2    0.06    0.05
 -30  -4   2    0.16    0.08
 -30  -4   2    0.05    0.04
 -30   4   2    0.02    0.05
 -28  -4   2   -0.01    0.03
 -28  -4   2    0.00    0.05
 -28  -4   2   -0.01    0.05
 -28  -4   2    0.03    0.07
 -28   4   2   -0.01    0.05
 -26  -4   2    0.13    0.07
 -26  -4   2    0.04    0.05
 -26  -4   2    0.10    0.05
 -26  -4   2    0.12    0.08
 -26   4   2    0.06    0.06
 -24  -4   2    0.29    0.09
 -24  -4   2    0.14    0.05
 -24  -4   2    0.16    0.07
 -24  -4   2    0.24    0.08
 -24   4   2    0.21    0.07
 -22  -4   2    0.53    0.08
 -22  -4   2    0.44    0.10
 -22  -4   2    0.63    0.10
 -22  -4   2    0.59    0.07
 -22  -4   2    0.55    0.10
 -22   4   2    0.74    0.11
 -20  -4   2    0.57    0.10
  20  -4  -2    0.63    0.13
 -20  -4   2    0.47    0.10
 -20  -4   2    0.46    0.09
 -18  -4   2    1.08    0.14
  18  -4  -2    1.22    0.15
 -18  -4   2    0.84    0.12
 -16  -4   2    0.84    0.13
 -16  -4   2    1.04    0.15
 -16  -4   2    1.05    0.13
  16  -4  -2    1.04    0.14
 -16  -4   2    1.12    0.13
 -14  -4   2    0.13    0.05
 -14  -4   2    0.07    0.06
 -14  -4   2    0.04    0.05
 -14  -4   2    0.09    0.06
  14  -4  -2    0.11    0.06
 -12  -4   2    3.19    0.22
  12  -4  -2    3.72    0.23
 -12  -4   2    3.32    0.21
 -12  -4   2    3.14    0.24
 -12  -4   2    3.26    0.22
 -10  -4   2    0.58    0.09
 -10  -4   2    0.70    0.09
 -10  -4   2    0.63    0.09
  10  -4  -2    0.63    0.09
 -10  -4   2    0.47    0.07
   8  -4  -2    1.95    0.15
  -8  -4   2    2.01    0.15
  -8  -4   2    1.95    0.13
  -8  -4   2    2.25    0.15
  -8  -4   2    1.84    0.16
  -8  -4   2    2.26    0.14
  -6  -4   2    4.66    0.24
  -6  -4   2    4.44    0.25
  -6  -4   2    4.34    0.23
   6  -4  -2    4.52    0.25
  -6  -4   2    4.96    0.25
  -4  -4   2    2.26    0.14
  -4  -4   2    2.48    0.16
  -4  -4   2    2.34    0.14
  -4  -4   2    2.74    0.16
   4  -4  -2    2.55    0.16
   4  -4  -2    2.37    0.14
  -2  -4   2   30.00    1.33
   2  -4  -2   30.09    1.33
   2  -4  -2   30.17    1.33
  -2  -4   2   29.21    1.33
   0  -4   2    5.26    0.28
   0  -4   2    5.40    0.28
   0  -4  -2    5.74    0.29
   0  -4  -2    5.69    0.29
  -2  -4  -2   25.32    1.11
   2  -4   2   23.98    1.11
  -2  -4  -2   24.97    1.12
   2  -4   2   24.75    1.10
  -2  -4  -2   24.54    1.06
   4  -4   2   19.68    0.90
  -4  -4  -2   19.37    0.91
  -4  -4  -2   19.47    0.86
   4  -4   2   20.35    0.88
  -4  -4  -2   19.26    0.90
  -6  -4  -2    1.46    0.13
  -6  -4  -2    1.65    0.17
  -6  -4  -2    1.71    0.10
  -6  -4  -2    1.63    0.15
  -6  -4  -2    1.74    0.12
   6  -4   2    1.64    0.11
   6  -4   2    2.00    0.14
  -8  -4  -2    9.44    0.45
  -8  -4  -2    9.02    0.44
  -8  -4  -2    9.08    0.53
  -8  -4  -2    8.74    0.46
   8  -4   2    8.89    0.46
 -10  -4  -2   14.66    0.70
 -10  -4  -2   15.58    0.72
 -10  -4  -2   15.26    0.84
 -12  -4  -2    2.98    0.20
 -12  -4  -2    2.59    0.19
  12  -4   2    2.63    0.20
 -12  -4  -2    3.04    0.24
  14  -4   2    2.34    0.21
 -14  -4  -2    2.29    0.23
 -14  -4  -2    1.99    0.18
  16  -4   2    0.85    0.13
 -16  -4  -2    0.84    0.12
 -16  -4  -2    1.02    0.16
 -18  -4  -2    2.50    0.22
 -18  -4  -2    2.10    0.24
 -18  -4  -2    2.02    0.19
  18  -4   2    2.40    0.23
 -20  -4  -2    0.02    0.04
 -20  -4  -2    0.08    0.06
 -20  -4  -2   -0.09    0.07
 -20  -4  -2    0.05    0.06
 -20  -4  -2    0.05    0.07
 -22  -4  -2    0.39    0.06
 -22  -4  -2    0.56    0.11
 -22  -4  -2    0.51    0.09
 -22  -4  -2    0.37    0.09
 -24  -4  -2    0.46    0.07
 -24  -4  -2    0.25    0.09
 -24  -4  -2    0.47    0.09
 -24  -4  -2    0.36    0.08
 -26  -4  -2    0.74    0.10
 -26  -4  -2    0.89    0.13
 -26  -4  -2    1.02    0.12
 -26  -4  -2    0.75    0.08
 -28  -4  -2    0.15    0.05
 -28  -4  -2    0.08    0.04
 -28  -4  -2    0.17    0.06
 -28  -4  -2    0.16    0.07
 -30  -4  -2    0.38    0.06
 -30  -4  -2    0.40    0.07
 -32  -4  -2    0.19    0.05
 -32  -4  -2    0.19    0.04
 -33  -5   2    0.21    0.04
 -33  -5   2    0.21    0.04
 -31  -5   2    0.09    0.03
 -31  -5   2    0.01    0.06
 -31  -5   2    0.06    0.04
 -31  -5   2    0.05    0.04
 -31   5   2    0.00    0.04
 -29  -5   2    0.24    0.08
 -29  -5   2    0.07    0.05
 -29  -5   2    0.22    0.06
 -29  -5   2    0.15    0.04
 -29   5   2    0.12    0.06
 -27  -5   2    0.03    0.06
 -27  -5   2    0.05    0.05
 -27  -5   2    0.06    0.04
 -27  -5   2   -0.07    0.06
 -27   5   2   -0.02    0.05
 -25  -5   2    0.05    0.06
 -25  -5   2    0.07    0.05
 -25  -5   2    0.09    0.08
 -25  -5   2    0.06    0.04
 -25   5   2    0.02    0.06
 -23  -5   2    0.15    0.06
 -23  -5   2    0.07    0.07
 -23  -5   2    0.07    0.06
 -23  -5   2    0.11    0.05
 -23  -5   2    0.14    0.05
 -23   5   2    0.10    0.07
 -21  -5   2    0.26    0.09
 -21  -5   2    0.31    0.06
 -21  -5   2    0.35    0.08
 -21  -5   2    0.33    0.06
 -21  -5   2    0.25    0.08
 -21   5   2    0.33    0.09
 -19  -5   2    0.05    0.05
 -19  -5   2    0.11    0.07
 -19  -5   2    0.12    0.07
 -19  -5   2    0.06    0.05
 -19  -5   2    0.06    0.06
 -19   5   2   -0.05    0.06
 -17  -5   2    0.40    0.10
 -17  -5   2    0.18    0.08
  17  -5  -2    0.42    0.10
 -17  -5   2    0.31    0.09
  15  -5  -2    0.39    0.09
 -15  -5   2    0.41    0.09
 -15  -5   2    0.48    0.11
 -15  -5   2    0.42    0.10
 -13  -5   2    0.63    0.11
 -13  -5   2    0.41    0.08
 -13  -5   2    0.66    0.11
  13  -5  -2    0.32    0.08
 -11  -5   2    4.10    0.23
  11  -5  -2    3.90    0.24
 -11  -5   2    3.38    0.24
 -11  -5   2    3.38    0.24
  -9  -5   2    2.78    0.18
  -9  -5   2    2.25    0.18
   9  -5  -2    2.98    0.19
  -9  -5   2    2.54    0.19
  -7  -5   2    2.17    0.16
  -7  -5   2    2.11    0.16
   7  -5  -2    2.18    0.16
  -5  -5   2    3.01    0.19
   5  -5  -2    2.87    0.19
  -5  -5   2    2.77    0.19
  -3  -5   2    5.08    0.28
  -3  -5   2    4.86    0.27
   3  -5  -2    4.82    0.27
   3  -5  -2    4.83    0.27
   1  -5  -2   11.80    0.58
  -1  -5   2   12.79    0.59
  -1  -5   2   11.87    0.58
   1  -5  -2   12.48    0.59
   1  -5   2    5.79    0.31
   1  -5   2    5.61    0.30
  -1  -5  -2    6.05    0.31
  -1  -5  -2    5.52    0.31
  -3  -5  -2    1.70    0.14
   3  -5   2    1.39    0.12
  -3  -5  -2    1.42    0.14
   3  -5   2    1.62    0.14
  -5  -5  -2    4.14    0.28
   5  -5   2    4.10    0.23
  -5  -5  -2    4.13    0.26
   5  -5   2    4.39    0.25
  -5  -5  -2    3.96    0.25
  -7  -5  -2    1.64    0.18
  -7  -5  -2    2.08    0.16
  -7  -5  -2    2.00    0.18
  -7  -5  -2    1.70    0.16
   7  -5   2    1.85    0.16
  -9  -5  -2    1.69    0.18
  -9  -5  -2    1.50    0.15
  -9  -5  -2    1.64    0.15
   9  -5   2    1.28    0.14
  11  -5   2    0.89    0.12
 -11  -5  -2    0.91    0.14
 -11  -5  -2    1.10    0.13
 -13  -5  -2    0.25    0.10
 -13  -5  -2    0.32    0.08
  13  -5   2    0.20    0.08
 -15  -5  -2    0.99    0.14
  15  -5   2    1.41    0.16
 -15  -5  -2    1.18    0.13
 -17  -5  -2    0.02    0.04
 -17  -5  -2    0.17    0.07
 -17  -5  -2    0.15    0.07
 -17  -5  -2    0.09    0.09
 -17  -5  -2    0.15    0.08
 -17  -5  -2    0.18    0.06
 -19  -5  -2    0.06    0.06
 -19  -5  -2    0.05    0.04
 -19  -5  -2    0.10    0.09
 -19  -5  -2    0.11    0.05
 -19  -5  -2    0.08    0.09
 -19  -5  -2    0.01    0.06
 -19  -5  -2    0.19    0.08
 -21  -5  -2   -0.06    0.09
 -21  -5  -2   -0.02    0.05
 -21  -5  -2    0.04    0.06
 -21  -5  -2    0.07    0.04
 -21  -5  -2    0.01    0.05
 -23  -5  -2    0.20    0.05
 -23  -5  -2    0.14    0.08
 -23  -5  -2    0.18    0.06
 -23  -5  -2    0.34    0.08
 -25  -5  -2    0.32    0.07
 -25  -5  -2    0.31    0.09
 -25  -5  -2    0.29    0.06
 -25  -5  -2    0.29    0.07
 -27  -5  -2    0.13    0.04
 -27  -5  -2    0.08    0.05
 -27  -5  -2    0.14    0.07
 -27  -5  -2    0.24    0.06
 -29  -5  -2   -0.02    0.03
 -29  -5  -2   -0.04    0.03
 -29  -5  -2   -0.04    0.05
 -29  -5  -2    0.00    0.03
 -31  -5  -2    0.02    0.03
 -30  -6   2    0.01    0.03
 -30  -6   2    0.02    0.03
 -30  -6   2   -0.06    0.04
 -30  -6   2    0.02    0.04
 -30   6   2    0.01    0.03
 -28  -6   2    0.06    0.06
 -28  -6   2    0.03    0.03
 -28  -6   2    0.03    0.05
 -28  -6   2    0.02    0.04
 -28   6   2    0.01    0.04
 -26  -6   2    0.13    0.06
 -26  -6   2    0.23    0.05
 -26  -6   2    0.25    0.06
 -26  -6   2    0.08    0.06
 -26   6   2    0.22    0.07
 -24  -6   2    0.20    0.05
 -24  -6   2    0.18    0.08
 -24  -6   2    0.16    0.06
 -24  -6   2    0.18    0.07
 -24   6   2    0.24    0.07
 -22  -6   2    0.18    0.05
 -22  -6   2    0.16    0.06
 -22  -6   2    0.14    0.07
 -22  -6   2    0.15    0.07
 -22  -6   2    0.11    0.05
 -22   6   2    0.20    0.07
 -20  -6   2    0.81    0.09
 -20  -6   2    0.69    0.10
 -20  -6   2    0.61    0.11
 -20  -6   2    0.75    0.09
 -20  -6   2    0.58    0.10
 -20   6   2    0.63    0.11
 -18  -6   2    0.35    0.12
 -18  -6   2    0.60    0.08
 -18  -6   2    0.40    0.08
 -18  -6   2    0.53    0.11
 -18   6   2    0.41    0.10
 -16  -6   2    0.80    0.11
 -16  -6   2    1.15    0.16
 -16  -6   2    0.91    0.13
 -16  -6   2    1.04    0.10
 -16   6   2    0.77    0.12
 -12  -6   2    0.22    0.08
 -12  -6   2    0.32    0.09
  12  -6  -2    0.23    0.08
 -10  -6   2    3.11    0.25
 -10  -6   2    2.89    0.24
  10  -6  -2    2.10    0.20
  -8  -6   2    0.19    0.08
  -8  -6   2    0.17    0.07
   8  -6  -2    0.20    0.07
  -6  -6   2    0.97    0.12
  -6  -6   2    1.18    0.14
   6  -6  -2    1.22    0.14
  -4  -6   2    1.93    0.17
   4  -6  -2    1.90    0.17
  -4  -6   2    1.59    0.16
  -2  -6   2    7.78    0.43
   2  -6  -2    8.48    0.44
  -2  -6   2    8.67    0.44
   0  -6  -2    1.68    0.15
   0  -6   2    1.70    0.15
   0  -6  -2    1.49    0.15
   0  -6   2    1.15    0.13
   2  -6   2    1.31    0.14
   2  -6   2    1.31    0.13
  -2  -6  -2    1.13    0.13
  -2  -6  -2    0.99    0.13
  -4  -6  -2    1.45    0.16
   4  -6   2    1.19    0.13
  -4  -6  -2    1.78    0.16
   6  -6   2    0.93    0.12
  -6  -6  -2    1.01    0.14
  -6  -6  -2    1.06    0.09
  -6  -6  -2    0.95    0.13
   8  -6   2    0.96    0.13
  10  -6   2    0.92    0.13
 -12  -6  -2    0.61    0.13
 -12  -6  -2    0.50    0.08
 -12   6  -2    0.37    0.08
 -14  -6  -2    0.02    0.08
 -14  -6  -2   -0.02    0.05
 -14  -6  -2    0.00    0.04
 -14  -6  -2    0.02    0.05
 -14  -6  -2    0.00    0.06
 -14  -6  -2    0.01    0.06
 -14  -6  -2    0.01    0.08
 -16  -6  -2    0.71    0.14
 -16  -6  -2    0.41    0.09
 -16  -6  -2    0.70    0.08
 -16  -6  -2    0.53    0.09
 -16  -6  -2    0.46    0.13
 -16  -6  -2    0.49    0.09
 -16  -6  -2    0.62    0.09
 -18  -6  -2    0.32    0.11
 -18  -6  -2    0.19    0.05
 -18  -6  -2    0.24    0.07
 -18  -6  -2    0.39    0.08
 -18  -6  -2    0.25    0.06
 -18  -6  -2    0.31    0.11
 -18  -6  -2    0.25    0.08
 -20  -6  -2    0.08    0.06
 -20  -6  -2    0.21    0.08
 -20  -6  -2    0.29    0.11
 -20  -6  -2    0.17    0.05
 -20  -6  -2    0.23    0.07
 -20  -6  -2    0.16    0.05
 -22  -6  -2    0.44    0.12
 -22  -6  -2    0.57    0.09
 -22  -6  -2    0.53    0.10
 -22  -6  -2    0.65    0.09
 -22  -6  -2    0.60    0.08
 -24  -6  -2    0.04    0.04
 -24  -6  -2   -0.01    0.04
 -24  -6  -2   -0.02    0.04
 -24  -6  -2   -0.02    0.06
 -26  -6  -2    0.09    0.05
 -26  -6  -2    0.08    0.04
 -26  -6  -2    0.19    0.07
 -26  -6  -2    0.03    0.03
 -28  -6  -2   -0.01    0.03
 -28  -6  -2    0.01    0.03
 -28  -6  -2    0.03    0.03
 -29  -7   2    0.12    0.05
 -27  -7   2    0.01    0.05
 -27  -7   2    0.01    0.03
 -27  -7   2    0.00    0.04
 -27  -7   2    0.08    0.04
 -27   7   2    0.02    0.04
 -25  -7   2    0.30    0.05
 -25  -7   2    0.16    0.07
 -25  -7   2    0.32    0.06
 -25   7   2    0.31    0.07
 -23  -7   2   -0.03    0.04
 -23  -7   2   -0.03    0.04
 -23  -7   2   -0.07    0.05
 -23  -7   2    0.06    0.04
 -23   7   2   -0.07    0.05
 -21  -7   2    0.52    0.10
 -21  -7   2    0.64    0.08
 -21  -7   2    0.49    0.08
 -21  -7   2    0.68    0.13
 -21   7   2    0.63    0.10
 -19  -7   2    0.61    0.09
 -19  -7   2    0.34    0.09
 -19  -7   2    0.50    0.13
 -19  -7   2    0.55    0.08
 -19   7   2    0.56    0.10
 -17  -7   2    1.30    0.18
 -17  -7   2    1.07    0.12
 -17  -7   2    1.20    0.11
 -17  -7   2    0.97    0.13
 -17   7   2    1.34    0.15
 -15  -7   2    0.11    0.07
 -15  -7   2    0.01    0.04
 -15  -7   2   -0.01    0.07
 -15  -7   2    0.00    0.06
 -15   7   2   -0.02    0.06
 -13  -7   2    0.30    0.07
 -13  -7   2    0.22    0.09
 -13  -7   2    0.09    0.07
 -13   7   2    0.10    0.05
 -13   7   2    0.12    0.07
 -11  -7   2    4.16    0.22
 -11  -7   2    3.99    0.25
 -11  -7   2    4.07    0.28
 -11   7   2    3.80    0.25
 -11   7   2    4.02    0.25
 -11   7   2    3.79    0.22
  -9  -7   2    0.63    0.08
  -9  -7   2    0.54    0.11
  -9   7   2    0.65    0.11
  -9   7   2    0.55    0.10
  -7   7   2    5.85    0.31
   7   7  -2    5.71    0.29
  -5  -7   2    2.23    0.22
  -5  -7   2    3.12    0.22
   5  -7  -2    3.36    0.23
  -3  -7   2    0.03    0.06
   3  -7  -2    0.08    0.06
  -3  -7   2    0.08    0.06
   1  -7  -2    1.61    0.17
  -1  -7   2    1.25    0.15
  -1  -7   2    1.93    0.18
  -1  -7  -2    0.60    0.11
   1  -7   2    0.53    0.10
  -3  -7  -2    1.10    0.14
  -3  -7  -2    1.11    0.15
   3  -7   2    1.15    0.14
   5   7   2    2.16    0.17
  -5   7  -2    2.13    0.18
  -7  -7  -2    0.67    0.12
   7   7   2    0.59    0.09
  -7   7  -2    0.66    0.09
  -7   7  -2    0.67    0.11
  -9  -7  -2    2.35    0.22
  -9   7  -2    1.87    0.13
   9   7   2    2.39    0.18
  -9   7  -2    2.19    0.19
  -9   7  -2    2.28    0.19
 -11  -7  -2    0.43    0.09
 -11  -7  -2    0.40    0.10
 -11  -7  -2    0.38    0.07
 -11  -7  -2    0.51    0.10
 -11   7  -2    0.37    0.09
 -13  -7  -2    0.28    0.06
 -13  -7  -2    0.10    0.08
 -13  -7  -2    0.21    0.08
 -13  -7  -2    0.28    0.07
 -13  -7  -2    0.23    0.08
 -15  -7  -2    0.31    0.07
 -15  -7  -2    0.35    0.09
 -15  -7  -2    0.31    0.06
 -15  -7  -2    0.41    0.08
 -15  -7  -2    0.35    0.11
 -17  -7  -2    0.16    0.05
 -17  -7  -2    0.26    0.06
 -17  -7  -2    0.18    0.06
 -17  -7  -2    0.20    0.07
 -17  -7  -2    0.14    0.09
 -17  -7  -2    0.12    0.07
 -19  -7  -2    0.12    0.05
 -19  -7  -2    0.06    0.05
 -19  -7  -2    0.03    0.05
 -19  -7  -2    0.23    0.08
 -19  -7  -2    0.15    0.06
 -19  -7  -2    0.13    0.09
 -21  -7  -2    0.05    0.04
 -21  -7  -2   -0.03    0.04
 -21  -7  -2   -0.02    0.07
 -21  -7  -2   -0.02    0.03
 -21  -7  -2    0.05    0.06
 -23  -7  -2    0.03    0.04
 -23  -7  -2    0.00    0.04
 -23  -7  -2    0.06    0.08
 -23  -7  -2   -0.02    0.05
 -25  -7  -2    0.03    0.04
 -25  -7  -2    0.01    0.03
 -25  -7  -2    0.04    0.05
  25   7   2    0.04    0.04
 -27  -7  -2    0.04    0.04
 -26  -8   2   -0.01    0.04
  26   8  -2    0.06    0.03
 -24  -8   2    0.03    0.05
 -24   8   2    0.13    0.04
  24   8  -2    0.05    0.04
 -22  -8   2    0.13    0.04
 -22  -8   2    0.23    0.08
 -22  -8   2    0.09    0.06
  22   8  -2    0.09    0.04
 -22   8   2    0.07    0.05
 -20  -8   2    0.46    0.07
 -20  -8   2    0.27    0.09
 -20  -8   2    0.43    0.08
  20   8  -2    0.36    0.06
 -20   8   2    0.37    0.07
 -18  -8   2   -0.03    0.07
 -18  -8   2   -0.03    0.05
 -18  -8   2   -0.06    0.05
  18   8  -2    0.01    0.04
 -18   8   2    0.00    0.05
 -16  -8   2    0.20    0.09
 -16  -8   2    0.34    0.08
 -16  -8   2    0.24    0.08
 -16   8   2    0.22    0.07
  16   8  -2    0.29    0.07
 -14  -8   2    0.66    0.11
 -14  -8   2    0.77    0.13
 -14  -8   2    0.53    0.09
 -14   8   2    0.84    0.11
  14   8  -2    0.65    0.09
 -12  -8   2    0.10    0.08
  12   8  -2    0.07    0.05
 -12   8   2    0.08    0.04
 -12   8   2   -0.02    0.05
 -10  -8   2    0.75    0.13
 -10   8   2    0.97    0.14
 -10   8   2    0.80    0.12
  10   8  -2    0.76    0.10
 -10   8   2    0.89    0.10
  -8  -8   2    0.22    0.09
  -8   8   2    0.24    0.08
   8   8  -2    0.20    0.07
  -8   8   2    0.29    0.08
  -6  -8   2    0.31    0.10
  -6   8   2    0.32    0.09
   6   8  -2    0.52    0.09
  -4  -8   2    0.37    0.10
  -4   8   2    0.36    0.10
   4   8  -2    0.46    0.08
  -4   8   2    0.45    0.09
  -2  -8   2    0.46    0.11
   2   8  -2    0.85    0.11
  -2   8   2    0.94    0.12
   0  -8   2    0.71    0.12
   0  -8  -2    0.71    0.13
   0   8  -2    1.00    0.15
   0   8   2    0.86    0.12
   0   8  -2    0.59    0.09
   2  -8   2    1.69    0.17
  -2  -8  -2    1.43    0.17
   2   8   2    1.32    0.14
  -2   8  -2    1.21    0.13
  -2   8  -2    1.11    0.14
  -4  -8  -2    0.22    0.09
  -4   8  -2    0.25    0.08
   4   8   2    0.32    0.08
  -4   8  -2    0.45    0.09
  -6  -8  -2    0.03    0.07
  -6   8  -2   -0.01    0.06
  -6   8  -2   -0.03    0.05
  -6   8  -2   -0.01    0.07
   6   8   2   -0.03    0.05
  -8  -8  -2    0.46    0.11
  -8   8  -2    0.36    0.09
  -8   8  -2    0.33    0.06
   8   8   2    0.45    0.09
  -8   8  -2    0.38    0.09
 -10  -8  -2    0.32    0.08
 -10  -8  -2    0.34    0.11
 -10   8  -2    0.38    0.08
 -10   8  -2    0.37    0.09
  10   8   2    0.43    0.08
 -12  -8  -2    0.00    0.06
 -12  -8  -2   -0.06    0.07
  12   8   2    0.07    0.05
 -14  -8  -2    0.09    0.06
 -14  -8  -2    0.20    0.09
 -14  -8  -2    0.20    0.07
  14   8   2    0.13    0.06
 -16  -8  -2    0.18    0.08
 -16  -8  -2    0.23    0.07
 -16  -8  -2    0.19    0.06
  16   8   2    0.18    0.06
 -18  -8  -2    0.01    0.04
 -18  -8  -2    0.06    0.06
 -18  -8  -2    0.02    0.04
 -18  -8  -2    0.06    0.07
  18   8   2    0.01    0.04
 -20  -8  -2    0.02    0.05
 -20  -8  -2    0.03    0.04
 -20  -8  -2    0.01    0.06
  20   8   2    0.02    0.04
 -22  -8  -2    0.12    0.04
 -22  -8  -2    0.06    0.06
 -22  -8  -2    0.00    0.04
  22   8   2    0.08    0.04
 -24  -8  -2    0.14    0.04
 -21  -9   2    0.08    0.05
 -21  -9   2    0.15    0.05
  21   9  -2    0.18    0.04
 -21   9   2    0.14    0.04
 -19  -9   2    0.02    0.06
 -19  -9   2    0.01    0.04
 -19  -9   2    0.07    0.05
  19   9  -2    0.11    0.04
 -19   9   2    0.03    0.04
 -17  -9   2    0.11    0.07
 -17  -9   2    0.06    0.06
 -17  -9   2    0.23    0.06
  17   9  -2    0.27    0.06
 -17   9   2    0.13    0.05
 -15  -9   2    0.34    0.07
 -15  -9   2    0.44    0.10
 -15   9   2    0.54    0.08
  15   9  -2    0.41    0.07
 -13  -9   2    0.34    0.09
 -13  -9   2    0.36    0.08
  13   9  -2    0.36    0.07
 -13   9   2    0.41    0.08
 -11  -9   2    0.14    0.07
  11   9  -2    0.24    0.06
 -11   9   2    0.29    0.07
  -9  -9   2    0.29    0.09
  -9   9   2    0.18    0.05
   9   9  -2    0.39    0.08
  -9   9   2    0.40    0.08
  -7  -9   2    0.25    0.09
  -7   9   2    0.53    0.09
  -7   9   2    0.48    0.09
   7   9  -2    0.36    0.08
  -5  -9   2    0.98    0.14
  -5   9   2    0.60    0.10
  -5   9   2    0.84    0.11
   5   9  -2    0.69    0.10
  -3  -9   2    1.19    0.15
  -3   9   2    1.31    0.14
  -3   9   2    1.19    0.13
   3   9  -2    1.08    0.12
   3   9  -2    0.94    0.14
  -1  -9   2    0.54    0.11
   1   9  -2    0.58    0.11
  -1   9   2    0.29    0.08
  -1   9   2    0.33    0.09
   1   9  -2    0.52    0.09
   1  -9   2    0.18    0.08
  -1  -9  -2    0.07    0.07
  -1   9  -2    0.12    0.07
   1   9   2    0.27    0.08
  -1   9  -2    0.15    0.06
  -3  -9  -2    0.34    0.10
   3  -9   2    0.26    0.09
  -3   9  -2    0.38    0.08
   3   9   2    0.27    0.08
  -3   9  -2    0.36    0.08
  -5  -9  -2    0.18    0.08
  -5   9  -2    0.29    0.07
   5   9   2    0.12    0.06
  -5   9  -2    0.08    0.05
  -5   9  -2    0.26    0.09
  -7  -9  -2    0.23    0.08
  -7   9  -2    0.18    0.04
  -7   9  -2    0.10    0.07
  -7   9  -2    0.27    0.07
   7   9   2    0.11    0.06
  -9  -9  -2    0.07    0.07
  -9  -9  -2    0.08    0.07
   9   9   2    0.08    0.06
  -9   9  -2    0.04    0.05
  -9   9  -2    0.15    0.07
 -11  -9  -2    0.05    0.07
 -11  -9  -2    0.01    0.06
  11   9   2   -0.02    0.04
 -13  -9  -2    0.11    0.06
 -13  -9  -2    0.22    0.08
  13   9   2    0.18    0.06
 -15  -9  -2    0.06    0.05
 -15  -9  -2    0.04    0.06
  15   9   2    0.07    0.05
 -17  -9  -2    0.00    0.05
 -17  -9  -2    0.03    0.04
  17   9   2   -0.03    0.04
 -19  -9  -2    0.07    0.04
 -19  -9  -2    0.08    0.05
  19   9   2    0.06    0.04
 -16 -10   2    0.03    0.04
 -16 -10   2    0.02    0.04
  16  10  -2    0.05    0.03
 -16  10   2    0.06    0.03
 -14 -10   2   -0.02    0.05
 -14 -10   2   -0.04    0.04
 -14  10   2   -0.01    0.03
  14  10  -2    0.00    0.03
 -12 -10   2    0.03    0.05
 -12 -10   2    0.06    0.05
 -12  10   2    0.08    0.04
  12  10  -2    0.10    0.04
 -10 -10   2    0.08    0.06
  10  10  -2    0.05    0.04
 -10  10   2    0.06    0.04
  -8 -10   2    0.14    0.07
  -8  10   2    0.10    0.05
  -8  10   2    0.06    0.03
   8  10  -2    0.07    0.04
  -6 -10   2    0.17    0.07
  -6  10   2    0.19    0.06
  -6  10   2    0.31    0.05
   6  10  -2    0.26    0.08
   6  10  -2    0.26    0.06
  -4 -10   2    0.12    0.07
   4  10  -2    0.35    0.08
   4  10  -2    0.12    0.05
  -4  10   2    0.23    0.06
  -4  10   2    0.19    0.06
  -2 -10   2    0.24    0.08
  -2  10   2    0.10    0.06
  -2  10   2    0.27    0.07
   2  10  -2    0.19    0.07
   2  10  -2    0.27    0.06
   0 -10   2    0.11    0.07
   0  10  -2    0.01    0.04
   0  10  -2   -0.06    0.04
   0  10   2    0.07    0.05
   0  10   2    0.05    0.06
  -2 -10  -2    0.06    0.06
  -2  10  -2    0.09    0.05
  -2  10  -2    0.10    0.07
   2  10   2    0.01    0.05
  -2  10  -2    0.11    0.05
   2  10   2    0.04    0.07
  -4 -10  -2    0.17    0.07
  -4  10  -2    0.07    0.05
  -4  10  -2    0.07    0.03
  -4  10  -2    0.06    0.06
   4  10   2    0.03    0.05
  -6 -10  -2    0.12    0.07
  -6  10  -2    0.14    0.05
   6  10   2    0.05    0.05
  -8 -10  -2    0.10    0.06
  -8 -10  -2    0.06    0.06
   8  10   2    0.12    0.05
 -10 -10  -2    0.20    0.06
 -10 -10  -2    0.13    0.06
  10  10   2    0.16    0.05
 -12 -10  -2    0.02    0.04
 -12 -10  -2    0.01    0.05
  12  10   2    0.10    0.04
 -14 -10  -2    0.08    0.05
 -14 -10  -2    0.09    0.04
  14  10   2    0.09    0.04
  -7 -11   2    0.00    0.04
  -5 -11   2    0.03    0.04
   5  11  -2    0.07    0.04
  -5  11   2    0.07    0.03
  -3 -11   2    0.15    0.05
  -3  11   2    0.02    0.03
   3  11  -2    0.11    0.04
  -3  11   2    0.11    0.03
  -1  11   2    0.17    0.04
  -1  11   2    0.24    0.04
   1  11  -2    0.25    0.03
   1  11   2    0.03    0.03
   1  11   2    0.08    0.04
   3  11   2    0.09    0.04
   3  11   2    0.16    0.05
 -36   0   3    0.01    0.03
 -34   0   3    0.03    0.04
 -34   0   3    0.01    0.05
 -32   0   3    0.01    0.04
 -32   0   3    0.09    0.06
 -30   0   3    0.00    0.04
 -30   0   3    0.06    0.06
 -30   0   3   -0.07    0.06
 -28   0   3    0.10    0.07
 -28   0   3    0.21    0.08
 -28   0   3    0.23    0.06
 -26   0   3    0.77    0.12
 -26   0   3    0.79    0.12
 -26   0   3    0.69    0.10
 -24   0   3    0.95    0.13
 -24   0   3    0.85    0.13
 -22   0   3    0.27    0.08
 -20   0   3    7.52    0.38
 -20   0   3    7.14    0.40
 -18   0   3    0.10    0.05
 -18   0   3   -0.01    0.04
 -18   0   3    0.12    0.05
 -16   0   3    3.69    0.21
 -16   0   3    3.75    0.20
 -16   0   3    4.05    0.23
 -14   0   3    3.63    0.21
 -14   0   3    3.74    0.19
 -14   0   3    3.62    0.20
 -12   0   3    9.38    0.46
 -12   0   3    9.45    0.44
 -12   0   3    9.86    0.42
 -10   0   3   25.11    1.08
 -10   0   3   24.57    1.10
 -10   0   3   25.55    1.04
 -10   0   3   25.52    1.12
  -8   0   3    1.99    0.11
  -8   0   3    1.94    0.12
  -8   0   3    1.89    0.10
  -8   0   3    1.88    0.10
  -6   0   3    0.03    0.02
   6   0  -3    0.00    0.02
  -6   0   3    0.01    0.02
  -6   0   3    0.00    0.02
   4   0  -3    0.17    0.03
  -4   0   3    0.23    0.03
  -4   0   3    0.36    0.03
  -4   0   3    0.17    0.02
   0   0   3    0.70    0.04
   0   0   3    0.69    0.04
   2   0   3    3.95    0.18
  -4   0  -3    3.37    0.16
  -4   0  -3    3.04    0.15
  -6   0  -3    2.24    0.12
  -6   0  -3    2.35    0.12
  -8   0  -3   17.30    0.79
  -8   0  -3   18.30    0.77
 -10   0  -3    1.98    0.12
 -10   0  -3    2.01    0.12
 -10   0  -3    1.95    0.16
 -12   0  -3    1.89    0.13
 -12   0  -3    1.86    0.13
 -12   0  -3    1.82    0.16
 -14   0  -3    0.08    0.04
 -14   0  -3    0.10    0.06
 -14   0  -3    0.12    0.05
 -16   0  -3    0.55    0.10
 -16   0  -3    0.53    0.08
 -16   0  -3    0.56    0.08
 -18   0  -3    0.42    0.10
 -18   0  -3    0.76    0.10
 -37  -1   3    0.11    0.04
 -37  -1   3    0.17    0.03
 -37   1   3    0.16    0.04
 -35  -1   3   -0.02    0.05
 -35  -1   3    0.07    0.03
 -35  -1   3    0.02    0.04
 -35   1   3    0.05    0.03
 -33  -1   3    0.26    0.05
 -33  -1   3    0.27    0.07
 -33  -1   3    0.14    0.07
 -33   1   3    0.25    0.06
 -31  -1   3    0.24    0.06
 -31  -1   3    0.26    0.08
 -31  -1   3    0.23    0.08
 -31   1   3    0.33    0.07
 -29  -1   3    0.26    0.06
 -29  -1   3    0.46    0.10
 -29  -1   3    0.25    0.08
 -29   1   3    0.35    0.09
 -29   1   3    0.20    0.06
 -27  -1   3   -0.01    0.05
 -27  -1   3    0.06    0.06
 -27  -1   3    0.08    0.07
 -27   1   3    0.05    0.07
 -27   1   3    0.09    0.05
 -25  -1   3    0.86    0.13
 -25  -1   3    1.10    0.14
 -25  -1   3    0.96    0.14
 -25  -1   3    1.05    0.11
 -25   1   3    0.89    0.11
 -23  -1   3    5.05    0.32
 -23  -1   3    5.16    0.30
 -23   1   3    4.58    0.31
 -21  -1   3    3.38    0.22
 -21  -1   3    3.21    0.23
 -21   1   3    3.29    0.23
 -19  -1   3    9.03    0.48
 -19  -1   3    8.76    0.45
 -19   1   3    9.69    0.48
 -17  -1   3   20.61    0.93
 -17  -1   3   22.00    1.00
 -17  -1   3   21.76    0.96
 -17   1   3   21.55    0.94
 -17   1   3   21.84    1.00
 -15  -1   3    6.35    0.32
 -15  -1   3    5.95    0.31
 -15  -1   3    6.53    0.34
 -15   1   3    6.49    0.34
 -15   1   3    6.36    0.30
 -15   1   3    6.62    0.31
 -13  -1   3   19.64    0.88
 -13  -1   3   19.79    0.90
 -13  -1   3   19.71    0.84
 -13  -1   3   19.44    0.87
 -13   1   3   19.73    0.85
 -13   1   3   20.42    0.82
 -13   1   3   19.06    0.90
 -11  -1   3   98.22    4.26
 -11  -1   3   98.14    3.98
 -11  -1   3   94.35    4.12
 -11  -1   3   95.62    4.26
 -11   1   3  104.55    3.97
 -11   1   3   97.82    4.27
 -11   1   3  100.16    4.11
  -9  -1   3  111.28    4.92
  -9  -1   3  117.04    4.59
  -9  -1   3  114.33    4.75
  -9  -1   3  113.46    4.91
  -9   1   3  112.06    4.92
  -9   1   3  116.07    4.74
  -9   1   3  118.72    4.58
   9   1  -3  107.46    4.94
  -7  -1   3   55.75    2.45
  -7  -1   3   61.92    2.62
  -7  -1   3   61.22    2.63
  -7   1   3   60.21    2.53
   7   1  -3   60.93    2.65
  -7   1   3   63.59    2.63
  -5  -1   3   14.84    0.68
  -5  -1   3   16.46    0.64
  -5  -1   3   15.52    0.66
  -5   1   3   14.90    0.65
   5   1  -3   15.07    0.69
  -5   1   3   15.91    0.68
  -5   1   3   15.06    0.63
  -3  -1   3    4.31    0.19
  -3  -1   3    4.53    0.19
  -3  -1   3    4.37    0.20
   3  -1  -3    4.47    0.20
  -3   1   3    4.02    0.20
  -3   1   3    4.24    0.18
  -3   1   3    4.20    0.19
  -1  -1   3    0.25    0.02
   1  -1  -3    0.28    0.03
  -1  -1   3    0.24    0.02
  -1  -1   3    0.28    0.03
  -1   1   3    0.20    0.02
   1  -1   3  104.10    4.62
   1  -1   3  105.53    4.46
  -1  -1  -3  104.35    4.65
   1  -1   3  108.43    4.31
  -1  -1  -3  112.72    4.47
   1  -1   3  108.12    4.63
   1   1   3  108.48    4.47
   3  -1   3   10.09    0.44
   3  -1   3   10.30    0.43
   3  -1   3   10.18    0.46
   3  -1   3   10.37    0.46
  -3  -1  -3   10.44    0.45
  -5  -1  -3   17.39    0.73
   5  -1   3   16.80    0.75
  -5  -1  -3   17.08    0.74
   5  -1   3   16.12    0.71
   5  -1   3   16.71    0.75
   5  -1   3   16.62    0.69
  -7  -1  -3   31.50    1.34
  -7  -1  -3   32.00    1.37
  -7   1  -3   30.71    1.38
  -7   1  -3   31.30    1.32
  -9  -1  -3    1.37    0.10
  -9  -1  -3    1.20    0.10
  -9   1  -3    1.32    0.10
  -9   1  -3    1.31    0.08
 -11  -1  -3    2.82    0.17
 -11  -1  -3    3.15    0.17
 -11  -1  -3    2.63    0.20
 -11   1  -3    3.04    0.15
 -11   1  -3    2.41    0.16
 -13  -1  -3   10.15    0.59
 -13  -1  -3   10.05    0.49
 -13  -1  -3   10.51    0.50
 -13   1  -3   10.39    0.50
 -13   1  -3   10.52    0.47
 -15  -1  -3    4.56    0.33
 -15  -1  -3    5.56    0.29
 -15   1  -3    5.23    0.28
 -17  -1  -3    3.07    0.25
 -17  -1  -3    2.88    0.20
 -17   1  -3    3.18    0.20
 -19  -1  -3    1.83    0.17
 -19  -1  -3    2.44    0.23
 -21  -1  -3    0.68    0.10
 -21  -1  -3    0.87    0.15
 -21  -1  -3    0.77    0.11
 -23  -1  -3    0.10    0.06
 -23  -1  -3    0.07    0.06
 -25  -1  -3    1.08    0.13
 -25  -1  -3    0.88    0.11
 -36  -2   3    0.10    0.03
 -36  -2   3    0.11    0.05
 -36  -2   3    0.11    0.04
 -36   2   3    0.06    0.03
 -34  -2   3    0.20    0.05
 -34  -2   3    0.21    0.05
 -34  -2   3    0.22    0.07
 -34   2   3    0.13    0.04
 -32  -2   3   -0.01    0.04
 -32  -2   3    0.02    0.04
 -32  -2   3    0.01    0.05
 -32   2   3   -0.01    0.04
 -30  -2   3    0.19    0.07
 -30  -2   3    0.17    0.05
 -30  -2   3    0.26    0.08
 -30   2   3    0.30    0.07
 -28  -2   3    0.22    0.08
 -28  -2   3    0.16    0.05
 -28  -2   3    0.15    0.07
 -28   2   3    0.22    0.07
 -26  -2   3    0.26    0.06
 -26  -2   3    0.21    0.08
 -26  -2   3    0.20    0.08
 -24  -2   3    0.48    0.10
 -24  -2   3    0.64    0.12
 -24  -2   3    0.39    0.07
 -24  -2   3    0.37    0.09
 -22  -2   3    1.29    0.14
 -22  -2   3    0.97    0.14
 -22   2   3    1.18    0.14
 -20  -2   3    1.48    0.16
 -20  -2   3    1.18    0.14
 -20   2   3    1.26    0.14
 -18  -2   3    1.16    0.12
 -18  -2   3    1.15    0.13
 -18   2   3    1.24    0.13
 -16  -2   3    3.51    0.21
 -16  -2   3    3.15    0.19
 -16  -2   3    3.24    0.20
 -16   2   3    3.29    0.21
 -14  -2   3    5.76    0.29
 -14  -2   3    5.38    0.30
 -14  -2   3    5.26    0.28
 -14  -2   3    5.56    0.29
 -14   2   3    5.93    0.30
 -12  -2   3    0.05    0.04
 -12  -2   3    0.03    0.03
 -12  -2   3    0.07    0.04
 -12  -2   3    0.07    0.03
 -12   2   3    0.04    0.04
 -10  -2   3    0.25    0.05
 -10  -2   3    0.19    0.05
 -10  -2   3    0.17    0.04
 -10   2   3    0.26    0.03
 -10   2   3    0.34    0.05
  -8  -2   3   15.20    0.69
  -8  -2   3   15.34    0.71
  -8  -2   3   15.43    0.71
  -8  -2   3   15.52    0.67
  -8   2   3   15.75    0.72
  -8   2   3   17.17    0.65
   6  -2  -3   28.76    1.25
  -6  -2   3   29.37    1.20
  -6  -2   3   30.17    1.16
  -6  -2   3   28.30    1.24
  -6  -2   3   28.90    1.24
  -6   2   3   25.38    1.18
  -6   2   3   27.08    1.14
  -4  -2   3   22.23    0.96
   4  -2  -3   20.25    0.95
   4  -2  -3   22.28    0.96
  -4  -2   3   22.78    0.93
  -4  -2   3   22.34    0.96
  -4  -2   3   23.05    0.90
  -4   2   3   21.67    0.88
  -4   2   3   19.60    0.91
  -2  -2   3   34.11    1.46
  -2  -2   3   35.05    1.51
   2  -2  -3   34.38    1.51
   2  -2  -3   33.57    1.51
  -2  -2   3   36.28    1.41
   0  -2   3    5.10    0.24
   0  -2   3    5.51    0.23
   0  -2  -3    5.57    0.25
   0  -2   3    5.67    0.25
   0  -2  -3    5.14    0.25
   0  -2   3    5.10    0.26
   0   2   3    5.25    0.24
   2  -2   3   36.81    1.46
  -2  -2  -3   36.47    1.58
  -2  -2  -3   36.32    1.57
  -2  -2  -3   37.20    1.53
   2  -2   3   34.82    1.51
   2  -2   3   36.83    1.58
   2  -2   3   35.38    1.58
   4  -2   3   21.10    0.94
   4  -2   3   20.20    0.89
  -4  -2  -3   20.87    0.91
  -4  -2  -3   22.98    0.93
   4  -2   3   20.79    0.86
   4  -2   3   21.28    0.94
  -6  -2  -3    0.58    0.06
   6  -2   3    0.59    0.04
   6  -2   3    0.50    0.07
  -6  -2  -3    0.52    0.06
   6  -2   3    0.56    0.05
   8  -2   3    4.38    0.25
  -8  -2  -3    4.70    0.24
  -8  -2  -3    4.77    0.24
   8  -2   3    4.86    0.23
  10  -2   3    3.77    0.22
  10  -2   3    3.90    0.20
 -10  -2  -3    3.86    0.21
 -10  -2  -3    3.26    0.20
 -10  -2  -3    3.80    0.26
  12  -2   3   18.80    0.86
 -12  -2  -3   19.04    1.03
 -12  -2  -3   19.71    0.86
  12  -2   3   18.97    0.89
 -12  -2  -3   19.27    0.87
 -14  -2  -3    0.95    0.13
 -14  -2  -3    0.94    0.11
  14  -2   3    0.87    0.11
  16  -2   3    1.37    0.16
 -16  -2  -3    1.45    0.18
 -16  -2  -3    1.76    0.16
  18  -2   3    0.26    0.08
 -18  -2  -3    0.34    0.08
 -18  -2  -3    0.54    0.12
 -20  -2  -3    0.05    0.06
 -20  -2  -3    0.02    0.05
 -20  -2  -3    0.22    0.10
 -22  -2  -3    0.06    0.08
 -22  -2  -3    0.06    0.05
 -22  -2  -3    0.13    0.10
 -22  -2  -3    0.09    0.06
 -24  -2  -3    0.59    0.09
 -24  -2  -3    0.54    0.10
 -26  -2  -3    0.30    0.07
 -26  -2  -3    0.35    0.08
 -28  -2  -3    0.01    0.04
 -28  -2  -3    0.04    0.05
 -30  -2  -3    0.38    0.07
 -30  -2  -3    0.39    0.07
 -35  -3   3    0.00    0.04
 -35  -3   3    0.00    0.02
 -35  -3   3    0.03    0.03
 -35   3   3   -0.01    0.03
 -33  -3   3    0.48    0.08
 -33  -3   3    0.59    0.09
 -33  -3   3    0.57    0.07
 -33   3   3    0.53    0.07
 -31  -3   3    0.17    0.06
 -31  -3   3    0.24    0.05
 -31  -3   3    0.33    0.08
 -31   3   3    0.29    0.07
 -29  -3   3    0.15    0.07
 -29  -3   3    0.23    0.06
 -29  -3   3    0.30    0.08
 -29   3   3    0.14    0.06
 -27  -3   3    0.14    0.05
 -27  -3   3    0.02    0.06
 -27  -3   3    0.22    0.07
 -27   3   3    0.23    0.07
 -25  -3   3    0.43    0.09
 -25  -3   3    0.27    0.08
 -25  -3   3    0.38    0.07
 -25  -3   3    0.51    0.11
 -25   3   3    0.47    0.09
 -23  -3   3    0.01    0.04
 -23  -3   3   -0.05    0.05
 -23  -3   3    0.04    0.04
 -23  -3   3    0.04    0.06
 -23   3   3    0.12    0.07
 -21  -3   3    0.37    0.10
  21  -3  -3    0.32    0.10
 -21  -3   3    0.26    0.08
 -19  -3   3    0.05    0.05
 -19  -3   3    0.14    0.06
  19  -3  -3   -0.01    0.06
 -17  -3   3    0.61    0.10
  17  -3  -3    0.60    0.11
 -17  -3   3    0.73    0.11
 -17  -3   3    0.43    0.08
 -15  -3   3    1.17    0.12
  15  -3  -3    1.15    0.13
 -15  -3   3    1.44    0.14
 -15  -3   3    1.16    0.12
 -15  -3   3    1.06    0.12
 -13  -3   3    0.07    0.04
 -13  -3   3    0.05    0.04
 -13  -3   3    0.07    0.04
  13  -3  -3    0.08    0.05
 -13  -3   3    0.05    0.04
 -11  -3   3    5.63    0.28
  11  -3  -3    5.66    0.31
 -11  -3   3    5.47    0.30
 -11  -3   3    5.44    0.30
 -11  -3   3    5.92    0.35
 -11  -3   3    5.85    0.29
  -9  -3   3    8.03    0.37
  -9  -3   3    7.82    0.45
   9  -3  -3    8.19    0.41
  -9  -3   3    8.22    0.40
  -9  -3   3    8.20    0.40
  -9  -3   3    8.20    0.39
  -7  -3   3    0.75    0.07
  -7  -3   3    0.74    0.07
   7  -3  -3    0.81    0.09
  -7  -3   3    0.78    0.08
  -7  -3   3    0.70    0.07
  -5  -3   3    4.81    0.23
   5  -3  -3    4.04    0.21
  -5  -3   3    4.64    0.21
  -5  -3   3    4.43    0.22
   5  -3  -3    4.19    0.23
  -5  -3   3    4.48    0.23
   3  -3  -3   35.79    1.50
  -3  -3   3   34.79    1.39
  -3  -3   3   34.93    1.50
   3  -3  -3   34.29    1.49
  -3  -3   3   33.23    1.44
  -3   3   3   31.89    1.38
  -3   3   3   33.55    1.43
  -1  -3   3   30.44    1.22
  -1  -3   3   31.10    1.31
   1  -3  -3   29.79    1.32
   1  -3  -3   29.84    1.31
  -1  -3   3   30.41    1.32
  -1  -3   3   27.99    1.26
  -1   3   3   29.34    1.26
   1  -3   3   70.28    2.92
   1  -3   3   73.13    3.15
  -1  -3  -3   74.42    3.16
   1  -3   3   73.23    3.15
  -1  -3  -3   70.79    3.15
  -1  -3  -3   73.75    3.04
   3  -3   3   42.38    1.87
  -3  -3  -3   42.11    1.86
  -3  -3  -3   41.72    1.86
  -3  -3  -3   42.14    1.81
  -3  -3  -3   43.15    1.88
   3  -3   3   44.12    1.86
  -5  -3  -3   24.24    1.06
   5  -3   3   25.28    1.10
  -5  -3  -3   23.82    1.09
   5  -3   3   24.64    1.08
   7  -3   3    2.93    0.18
  -7  -3  -3    3.11    0.17
   7  -3   3    2.73    0.15
  -7  -3  -3    2.68    0.17
  -9  -3  -3    1.77    0.12
   9  -3   3    1.62    0.11
   9  -3   3    1.64    0.14
  -9  -3  -3    1.63    0.17
  -9  -3  -3    1.79    0.13
 -11  -3  -3    1.11    0.12
 -11  -3  -3    1.39    0.12
  11  -3   3    1.23    0.13
 -11  -3  -3    1.27    0.15
 -13  -3  -3    3.56    0.23
 -13  -3  -3    3.90    0.29
  13  -3   3    4.04    0.25
 -15  -3  -3    2.52    0.19
 -15  -3  -3    2.86    0.24
  15  -3   3    2.39    0.21
 -17  -3  -3    0.54    0.09
 -17  -3  -3    0.48    0.12
  17  -3   3    0.26    0.09
 -19  -3  -3    0.84    0.12
 -19  -3  -3    0.70    0.11
  19  -3   3    0.91    0.14
 -19  -3  -3    0.69    0.14
 -21  -3  -3    0.13    0.07
 -21  -3  -3    0.24    0.07
 -21  -3  -3    0.07    0.07
 -21  -3  -3    0.33    0.11
 -23  -3  -3    0.13    0.07
 -23  -3  -3    0.15    0.06
 -23  -3  -3    0.19    0.08
 -25  -3  -3    0.04    0.05
 -25  -3  -3    0.10    0.07
 -25  -3  -3    0.07    0.06
 -27  -3  -3    0.68    0.10
 -27  -3  -3    0.63    0.09
 -27  -3  -3    0.72    0.11
 -29  -3  -3    0.06    0.04
 -29  -3  -3    0.02    0.05
 -31  -3  -3    0.21    0.05
 -31  -3  -3    0.29    0.06
 -34  -4   3    0.06    0.03
 -34  -4   3    0.11    0.04
 -34  -4   3    0.09    0.04
 -34   4   3    0.02    0.03
 -32  -4   3   -0.05    0.04
 -32  -4   3    0.07    0.05
 -32  -4   3    0.06    0.03
 -32   4   3    0.13    0.05
 -30  -4   3    0.40    0.10
 -30  -4   3    0.51    0.07
 -30  -4   3    0.46    0.09
 -30  -4   3    0.62    0.09
 -30   4   3    0.54    0.09
 -28  -4   3    0.06    0.06
 -28  -4   3    0.12    0.06
 -28  -4   3    0.00    0.07
 -28  -4   3    0.05    0.04
 -28   4   3    0.10    0.06
 -26  -4   3    0.03    0.06
 -26  -4   3   -0.02    0.07
 -26  -4   3    0.07    0.04
 -26  -4   3    0.04    0.06
 -26   4   3   -0.06    0.05
 -24  -4   3   -0.03    0.05
 -24  -4   3    0.05    0.06
 -24  -4   3    0.05    0.05
 -24  -4   3    0.07    0.04
 -24  -4   3   -0.05    0.07
 -24   4   3   -0.02    0.06
 -22  -4   3    0.33    0.06
 -22  -4   3    0.37    0.09
 -22  -4   3    0.27    0.08
 -22  -4   3    0.40    0.07
 -22  -4   3    0.31    0.10
 -22   4   3    0.34    0.09
 -20  -4   3    1.66    0.18
 -20  -4   3    2.14    0.19
  20  -4  -3    1.83    0.20
 -20  -4   3    1.95    0.20
 -18  -4   3    0.27    0.08
 -18  -4   3    0.33    0.09
  18  -4  -3    0.32    0.09
  16  -4  -3    1.21    0.15
 -16  -4   3    0.91    0.12
 -16  -4   3    1.09    0.14
 -16  -4   3    1.01    0.13
 -14  -4   3    0.25    0.08
 -14  -4   3    0.35    0.08
  14  -4  -3    0.44    0.09
 -14  -4   3    0.27    0.07
 -12  -4   3    2.63    0.18
 -12  -4   3    3.18    0.21
  12  -4  -3    2.95    0.20
 -12  -4   3    3.24    0.19
 -12  -4   3    2.83    0.20
  10  -4  -3    0.38    0.07
 -10  -4   3    0.43    0.07
 -10  -4   3    0.35    0.06
 -10  -4   3    0.38    0.07
 -10  -4   3    0.38    0.06
  -8  -4   3    1.04    0.10
  -8  -4   3    1.04    0.10
  -8  -4   3    0.99    0.11
   8  -4  -3    0.92    0.11
  -8  -4   3    1.01    0.11
  -6  -4   3    0.03    0.03
  -6  -4   3    0.02    0.03
  -6  -4   3    0.05    0.03
  -6  -4   3    0.11    0.04
   6  -4  -3    0.06    0.04
  -4  -4   3    4.04    0.21
  -4  -4   3    4.15    0.22
   4  -4  -3    4.36    0.23
  -4  -4   3    4.34    0.23
   4  -4  -3    4.57    0.24
  -4  -4   3    4.43    0.24
   2  -4  -3   10.11    0.47
  -2  -4   3    9.40    0.46
   2  -4  -3    9.58    0.46
  -2  -4   3    9.82    0.47
   0  -4  -3   12.53    0.58
   0  -4  -3   12.58    0.58
   0  -4   3   12.67    0.58
   0  -4   3   12.32    0.57
   0   4   3   11.76    0.54
   2  -4   3    8.14    0.39
  -2  -4  -3    7.75    0.40
  -2  -4  -3    8.66    0.39
   2  -4   3    8.23    0.41
  -2  -4  -3    8.33    0.41
  -4  -4  -3   23.13    1.01
   4  -4   3   23.64    1.03
  -4  -4  -3   22.37    1.04
  -4  -4  -3   21.91    1.05
   4  -4   3   23.55    1.05
  -4  -4  -3   23.60    1.03
   6  -4   3    8.53    0.44
  -6  -4  -3    8.81    0.43
  -6  -4  -3    8.93    0.44
   6  -4   3    9.25    0.42
   8  -4   3    1.46    0.10
   8  -4   3    1.31    0.13
  -8  -4  -3    1.46    0.13
  -8  -4  -3    1.22    0.15
  -8  -4  -3    1.26    0.12
  10  -4   3   15.57    0.77
 -10  -4  -3   15.88    0.74
 -10  -4  -3   16.70    0.90
 -12  -4  -3    0.70    0.10
 -12  -4  -3    0.97    0.14
  12  -4   3    0.86    0.12
 -14  -4  -3    0.44    0.12
 -14  -4  -3    0.58    0.10
  14  -4   3    0.46    0.10
 -16  -4  -3    0.06    0.09
 -16  -4  -3    0.13    0.06
  16  -4   3    0.22    0.08
 -16  -4  -3    0.21    0.07
 -18  -4  -3    1.55    0.15
 -18  -4  -3    2.09    0.23
 -18  -4  -3    1.52    0.16
 -18  -4  -3    1.51    0.10
 -20  -4  -3    0.24    0.08
 -20  -4  -3    0.35    0.08
 -20  -4  -3    0.30    0.09
 -20  -4  -3    0.41    0.12
 -20  -4  -3    0.40    0.06
 -22  -4  -3    0.36    0.06
 -22  -4  -3    0.26    0.09
 -22  -4  -3    0.38    0.13
 -22  -4  -3    0.56    0.10
 -22  -4  -3    0.23    0.07
 -24  -4  -3    0.12    0.07
 -24  -4  -3    0.08    0.06
 -24  -4  -3   -0.01    0.04
 -24  -4  -3    0.03    0.05
 -26  -4  -3    0.25    0.06
 -26  -4  -3    0.48    0.09
 -26  -4  -3    0.37    0.09
 -28  -4  -3    0.03    0.04
 -28  -4  -3    0.01    0.06
 -28  -4  -3    0.06    0.05
 -30  -4  -3    0.22    0.05
 -30  -4  -3    0.03    0.03
 -30  -4  -3    0.21    0.05
 -33  -5   3    0.18    0.03
 -33  -5   3    0.28    0.05
 -33  -5   3    0.15    0.04
 -33   5   3    0.25    0.05
 -31  -5   3    0.09    0.03
 -31  -5   3    0.07    0.04
 -31  -5   3    0.09    0.06
 -31  -5   3    0.08    0.05
 -31   5   3    0.11    0.05
 -29  -5   3    0.10    0.05
 -29  -5   3    0.19    0.05
 -29  -5   3    0.12    0.07
 -29  -5   3    0.09    0.06
 -29   5   3    0.12    0.06
 -27  -5   3   -0.01    0.07
 -27  -5   3    0.15    0.07
 -27  -5   3    0.06    0.05
 -27  -5   3    0.08    0.04
 -27   5   3    0.05    0.06
 -25  -5   3    0.24    0.06
 -25  -5   3    0.17    0.07
 -25  -5   3    0.08    0.06
 -25  -5   3    0.11    0.08
 -25   5   3    0.10    0.07
 -23  -5   3    0.06    0.06
 -23  -5   3    0.12    0.08
 -23  -5   3    0.09    0.05
 -23  -5   3    0.06    0.04
 -23  -5   3    0.20    0.07
 -23   5   3    0.00    0.06
 -21  -5   3    0.17    0.07
 -21  -5   3    0.34    0.09
 -21  -5   3    0.12    0.05
 -21  -5   3    0.12    0.05
 -21  -5   3    0.11    0.07
 -21   5   3    0.10    0.07
 -19  -5   3    0.00    0.06
 -19  -5   3    0.00    0.04
 -19  -5   3    0.03    0.06
 -19  -5   3    0.08    0.05
 -19   5   3    0.10    0.07
 -17  -5   3    0.79    0.14
 -17  -5   3    0.48    0.11
  17  -5  -3    0.44    0.10
 -17  -5   3    0.83    0.13
 -15  -5   3    0.49    0.09
 -15  -5   3    0.52    0.11
 -15  -5   3    0.21    0.08
  15  -5  -3    0.57    0.11
  13  -5  -3    0.71    0.11
 -13  -5   3    0.43    0.09
 -13  -5   3    0.57    0.10
 -13  -5   3    0.57    0.10
 -11  -5   3    0.62    0.11
  11  -5  -3    0.61    0.10
 -11  -5   3    0.59    0.10
 -11  -5   3    0.75    0.10
  -9  -5   3    1.65    0.16
  -9  -5   3    1.88    0.15
   9  -5  -3    1.88    0.17
  -9  -5   3    1.98    0.17
   7  -5  -3    0.86    0.10
  -7  -5   3    0.71    0.10
  -7  -5   3    0.72    0.10
   5  -5  -3    0.76    0.10
  -5  -5   3    0.62    0.09
  -5  -5   3    0.58    0.09
  -3  -5   3   16.45    0.78
  -3  -5   3   16.44    0.77
   3  -5  -3   16.86    0.77
   3  -5  -3   16.26    0.77
  -1  -5   3    1.48    0.13
  -1  -5   3    1.17    0.12
   1  -5  -3    1.53    0.14
   1  -5  -3    1.40    0.13
  -1  -5  -3    1.05    0.11
   1  -5   3    1.22    0.11
  -1  -5  -3    0.85    0.11
   1  -5   3    1.09    0.12
  -3  -5  -3    3.62    0.25
  -3  -5  -3    4.51    0.25
   3  -5   3    4.48    0.24
   3  -5   3    4.00    0.24
  -5  -5  -3    2.63    0.15
  -5  -5  -3    2.70    0.22
   5  -5   3    2.93    0.17
  -5  -5  -3    2.48    0.18
   5  -5   3    2.88    0.19
  -5  -5  -3    2.86    0.18
   7  -5   3    7.11    0.38
  -7  -5  -3    6.84    0.36
  -7  -5  -3    7.25    0.45
   9  -5   3    0.92    0.12
  -9  -5  -3    0.67    0.10
  -9  -5  -3    0.75    0.14
 -11  -5  -3    0.97    0.12
 -11  -5  -3    1.04    0.16
  11  -5   3    1.56    0.16
  13  -5   3    1.76    0.18
 -13  -5  -3    1.48    0.20
 -13  -5  -3    1.60    0.16
 -15  -5  -3    1.05    0.12
 -15  -5  -3    0.86    0.10
 -15  -5  -3    1.26    0.18
 -15  -5  -3    1.14    0.13
 -17  -5  -3    2.54    0.17
 -17  -5  -3    1.82    0.13
 -17  -5  -3    2.18    0.14
 -17  -5  -3    1.89    0.18
 -17  -5  -3    2.92    0.27
 -17  -5  -3    2.06    0.22
 -17  -5  -3    2.22    0.20
 -19  -5  -3    0.15    0.10
 -19  -5  -3    0.25    0.07
 -19  -5  -3    0.30    0.11
 -19  -5  -3    0.37    0.06
 -19  -5  -3    0.17    0.07
 -19  -5  -3    0.32    0.09
 -21  -5  -3    0.57    0.10
 -21  -5  -3    0.89    0.16
 -21  -5  -3    0.96    0.16
 -21  -5  -3    0.80    0.11
 -21  -5  -3    0.78    0.12
 -21  -5  -3    0.75    0.08
 -23  -5  -3    0.35    0.09
 -23  -5  -3    0.33    0.08
 -23  -5  -3    0.33    0.07
 -23  -5  -3    0.30    0.06
 -25  -5  -3    0.04    0.05
 -25  -5  -3    0.03    0.06
 -25  -5  -3    0.08    0.05
 -25  -5  -3    0.08    0.04
 -27  -5  -3    0.45    0.07
 -27  -5  -3    0.43    0.07
 -27  -5  -3    0.51    0.09
 -29  -5  -3    0.03    0.03
 -29  -5  -3    0.06    0.05
 -29  -5  -3   -0.03    0.03
 -32  -6   3    0.08    0.03
 -30  -6   3    0.39    0.05
 -30  -6   3    0.34    0.06
 -30  -6   3    0.33    0.07
 -30  -6   3    0.36    0.06
 -30   6   3    0.31    0.06
 -28  -6   3    0.38    0.06
 -28  -6   3    0.18    0.06
 -28  -6   3    0.25    0.06
 -28  -6   3    0.25    0.08
 -28   6   3    0.28    0.06
 -26  -6   3    0.20    0.06
 -26  -6   3    0.24    0.08
 -26  -6   3    0.25    0.05
 -26  -6   3    0.20    0.06
 -26   6   3    0.15    0.06
 -24  -6   3    0.09    0.04
 -24  -6   3    0.15    0.07
 -24  -6   3    0.07    0.07
 -24  -6   3    0.14    0.05
 -24  -6   3    0.07    0.05
 -24   6   3    0.14    0.07
 -22  -6   3    0.29    0.06
 -22  -6   3    0.38    0.10
 -22  -6   3    0.28    0.07
 -22  -6   3    0.29    0.08
 -22  -6   3    0.39    0.07
 -22   6   3    0.19    0.07
 -20  -6   3    0.30    0.07
 -20  -6   3    0.24    0.09
 -20  -6   3    0.29    0.06
 -20   6   3    0.35    0.09
 -18  -6   3    0.15    0.06
 -18  -6   3    0.10    0.08
 -18  -6   3    0.10    0.10
 -18  -6   3    0.22    0.06
 -18   6   3    0.03    0.07
 -16  -6   3    0.30    0.06
 -16  -6   3    0.21    0.08
 -16  -6   3    0.27    0.11
 -16  -6   3    0.40    0.08
 -16   6   3    0.21    0.08
 -14  -6   3    1.29    0.17
 -12  -6   3    0.43    0.10
  12  -6  -3    0.62    0.11
 -12  -6   3    0.49    0.11
 -10  -6   3    0.52    0.11
  10  -6  -3    0.33    0.08
 -10  -6   3    0.50    0.10
  -8  -6   3    1.35    0.15
  -8  -6   3    1.10    0.13
   8  -6  -3    1.18    0.13
  -6  -6   3    3.60    0.24
   6  -6  -3    3.34    0.23
  -6  -6   3    3.70    0.24
   4  -6  -3    8.64    0.43
  -4  -6   3    7.65    0.43
  -4  -6   3    7.79    0.43
   2  -6  -3    2.27    0.17
  -2  -6   3    1.91    0.17
  -2  -6   3    1.93    0.17
   0  -6  -3    1.22    0.13
   0  -6   3    1.16    0.13
   0  -6  -3    1.23    0.14
   0  -6   3    1.21    0.13
   2  -6   3    0.20    0.07
  -2  -6  -3    0.07    0.06
   2  -6   3    0.12    0.06
  -2  -6  -3    0.06    0.07
  -4  -6  -3    5.26    0.31
  -4  -6  -3    4.91    0.27
   4  -6   3    5.08    0.29
   4  -6   3    5.61    0.31
   6  -6   3    2.98    0.21
   8  -6   3    0.71    0.11
  10  -6   3    1.18    0.15
 -10  -6  -3    1.72    0.20
 -12  -6  -3    1.93    0.17
 -12  -6  -3    2.46    0.17
 -12  -6  -3    2.14    0.14
 -12  -6  -3    2.02    0.17
 -12  -6  -3    2.43    0.24
 -12   6  -3    1.98    0.16
 -14  -6  -3    0.30    0.11
 -14  -6  -3    0.24    0.07
 -14  -6  -3    0.23    0.10
 -14  -6  -3    0.13    0.07
 -14  -6  -3    0.20    0.08
 -14  -6  -3    0.26    0.07
 -14  -6  -3    0.17    0.06
 -16  -6  -3    0.32    0.08
 -16  -6  -3    0.37    0.07
 -16  -6  -3    0.29    0.09
 -16  -6  -3    0.53    0.13
 -16  -6  -3    0.33    0.07
 -16  -6  -3    0.34    0.11
 -16  -6  -3    0.20    0.07
 -18  -6  -3    0.27    0.07
 -18  -6  -3    0.29    0.11
 -18  -6  -3    0.12    0.10
 -18  -6  -3    0.28    0.08
 -18  -6  -3    0.26    0.06
 -18  -6  -3    0.26    0.08
 -18  -6  -3    0.17    0.05
 -20  -6  -3    0.03    0.04
 -20  -6  -3   -0.11    0.08
 -20  -6  -3    0.06    0.05
 -20  -6  -3   -0.03    0.05
 -20  -6  -3    0.06    0.05
 -22  -6  -3    0.02    0.05
 -22  -6  -3    0.02    0.06
 -22  -6  -3    0.02    0.04
 -22  -6  -3   -0.08    0.04
 -22  -6  -3    0.02    0.08
 -24  -6  -3    0.02    0.04
 -24  -6  -3    0.02    0.04
 -24  -6  -3    0.05    0.06
 -24  -6  -3    0.04    0.04
 -26  -6  -3    0.25    0.07
 -26  -6  -3    0.12    0.04
 -26  -6  -3    0.14    0.04
 -26  -6  -3    0.23    0.06
 -28  -6  -3    0.11    0.04
 -28  -6  -3    0.11    0.04
 -28  -6  -3    0.06    0.05
 -29  -7   3   -0.06    0.03
 -29  -7   3    0.02    0.02
 -27  -7   3    0.04    0.05
 -27  -7   3    0.08    0.04
 -27   7   3    0.08    0.04
 -25  -7   3    0.07    0.04
 -25  -7   3    0.01    0.05
 -25   7   3    0.04    0.05
 -23  -7   3    0.07    0.04
 -23  -7   3    0.10    0.06
 -23  -7   3    0.04    0.04
 -23   7   3    0.07    0.06
 -21  -7   3    0.09    0.09
 -21  -7   3    0.13    0.05
 -21  -7   3    0.06    0.05
 -21  -7   3   -0.01    0.06
 -21   7   3    0.07    0.06
 -19  -7   3   -0.02    0.08
 -19  -7   3    0.01    0.04
 -19  -7   3    0.06    0.06
 -19  -7   3   -0.04    0.05
 -19   7   3    0.04    0.06
 -17  -7   3    0.07    0.05
 -17  -7   3    0.10    0.07
 -17  -7   3    0.05    0.08
 -17  -7   3    0.05    0.06
 -17   7   3    0.03    0.06
 -15  -7   3   -0.02    0.06
 -15  -7   3    0.06    0.05
 -15  -7   3   -0.07    0.06
 -15  -7   3   -0.01    0.08
 -15   7   3   -0.01    0.06
 -13  -7   3    0.10    0.08
 -13  -7   3    0.09    0.07
 -13  -7   3    0.11    0.05
 -13   7   3    0.05    0.05
 -13   7   3    0.02    0.07
 -11  -7   3    0.69    0.09
 -11  -7   3    0.73    0.12
 -11   7   3    0.70    0.11
 -11   7   3    0.81    0.10
 -11   7   3    0.82    0.13
  -9  -7   3    0.03    0.07
  -9   7   3    0.12    0.07
  -9   7   3   -0.03    0.06
  -7   7   3    0.03    0.06
   7   7  -3    0.11    0.05
  -5  -7   3    0.87    0.14
   5  -7  -3    0.76    0.12
  -3  -7   3    0.41    0.10
   3  -7  -3    0.52    0.10
  -3  -7   3    0.37    0.09
  -1  -7   3   -0.01    0.06
   1  -7  -3    0.11    0.07
  -1  -7   3    0.11    0.07
   1  -7   3    0.15    0.07
   1  -7   3    0.22    0.08
  -3   7  -3    0.00    0.07
   3   7   3    0.08    0.06
  -5   7  -3    0.83    0.14
   5   7   3    0.66    0.10
  -5   7  -3    0.57    0.10
  -7  -7  -3    1.50    0.18
  -7   7  -3    1.32    0.12
   7   7   3    1.16    0.13
  -7   7  -3    1.03    0.14
  -9  -7  -3    2.14    0.22
  -9  -7  -3    2.16    0.19
  -9   7  -3    2.50    0.19
   9   7   3    2.19    0.18
  -9   7  -3    1.99    0.13
 -11  -7  -3    1.41    0.15
 -11  -7  -3    1.13    0.16
 -11  -7  -3    1.08    0.13
 -11  -7  -3    0.91    0.11
 -11   7  -3    1.05    0.12
 -13  -7  -3    0.10    0.05
 -13  -7  -3    0.07    0.08
 -13  -7  -3    0.18    0.08
 -13  -7  -3    0.14    0.06
 -13  -7  -3    0.03    0.06
 -15  -7  -3    0.08    0.05
 -15  -7  -3    0.10    0.06
 -15  -7  -3    0.23    0.05
 -15  -7  -3    0.06    0.08
 -15  -7  -3    0.10    0.06
 -15  -7  -3    0.15    0.07
 -17  -7  -3    0.30    0.07
 -17  -7  -3    0.11    0.07
 -17  -7  -3    0.15    0.06
 -17  -7  -3    0.21    0.05
 -17  -7  -3    0.25    0.10
 -17  -7  -3    0.19    0.06
 -19  -7  -3    0.26    0.08
 -19  -7  -3    0.06    0.08
 -19  -7  -3    0.30    0.06
 -19  -7  -3    0.25    0.05
 -19  -7  -3    0.34    0.07
 -21  -7  -3    0.24    0.06
 -21  -7  -3    0.14    0.07
 -21  -7  -3    0.10    0.08
 -21  -7  -3    0.14    0.05
 -23  -7  -3    0.22    0.05
 -23  -7  -3    0.16    0.06
 -23  -7  -3    0.13    0.08
 -23  -7  -3    0.13    0.05
  23   7   3    0.13    0.05
 -25  -7  -3    0.07    0.05
 -25  -7  -3    0.13    0.04
  25   7   3    0.10    0.04
 -26  -8   3    0.26    0.05
  26   8  -3    0.20    0.04
 -24  -8   3    0.04    0.05
  24   8  -3    0.06    0.04
 -24   8   3    0.07    0.04
 -22  -8   3    0.06    0.05
 -22  -8   3    0.08    0.04
 -22  -8   3    0.11    0.07
  22   8  -3    0.08    0.04
 -22   8   3    0.12    0.05
 -20  -8   3    0.09    0.06
 -20  -8   3    0.10    0.07
 -20  -8   3    0.07    0.05
 -20   8   3    0.10    0.05
 -18  -8   3    0.09    0.08
 -18  -8   3    0.16    0.06
 -18  -8   3    0.21    0.07
  18   8  -3    0.16    0.05
 -18   8   3    0.13    0.06
 -16  -8   3    0.23    0.07
 -16  -8   3    0.13    0.09
 -16  -8   3    0.24    0.08
 -16   8   3    0.27    0.07
  16   8  -3    0.18    0.06
 -14  -8   3    2.15    0.22
 -14  -8   3    2.50    0.20
  14   8  -3    2.28    0.16
 -14   8   3    2.33    0.19
 -12  -8   3    0.33    0.10
  12   8  -3    0.39    0.07
 -12   8   3    0.23    0.06
 -12   8   3    0.25    0.08
 -10  -8   3    1.06    0.15
 -10   8   3    1.04    0.11
 -10   8   3    0.97    0.12
  10   8  -3    1.27    0.12
  -8  -8   3    2.10    0.21
  -8   8   3    2.31    0.19
  -8   8   3    2.26    0.19
   8   8  -3    1.93    0.16
  -6  -8   3    3.29    0.24
  -6   8   3    3.17    0.22
   6   8  -3    2.99    0.19
  -6   8   3    2.88    0.23
   6   8  -3    3.17    0.32
  -4  -8   3    0.21    0.09
   4   8  -3    0.36    0.08
  -4   8   3    0.35    0.08
  -4   8   3    0.61    0.12
   4   8  -3    0.09    0.10
  -2  -8   3    1.53    0.17
   2   8  -3    1.73    0.19
  -2   8   3    1.65    0.16
   2   8  -3    1.54    0.14
   0  -8   3    2.94    0.21
   0  -8  -3    2.39    0.23
   0   8  -3    2.57    0.17
   0   8  -3    2.19    0.21
   0   8   3    2.59    0.20
   2  -8   3    0.84    0.13
  -2  -8  -3    0.69    0.13
  -2   8  -3    0.61    0.10
   2   8   3    0.86    0.11
  -2   8  -3    0.68    0.11
  -4  -8  -3    1.31    0.17
   4  -8   3    1.04    0.14
  -4   8  -3    1.30    0.14
  -4   8  -3    1.30    0.16
   4   8   3    1.14    0.13
  -4   8  -3    1.26    0.14
  -6  -8  -3    1.09    0.16
  -6   8  -3    1.49    0.12
   6   8   3    1.32    0.14
  -6   8  -3    1.16    0.15
  -8  -8  -3    0.35    0.10
  -8   8  -3    0.31    0.05
   8   8   3    0.24    0.07
  -8   8  -3    0.31    0.08
 -10  -8  -3    0.48    0.11
 -10  -8  -3    0.46    0.09
  10   8   3    0.53    0.09
 -10   8  -3    0.48    0.09
 -12  -8  -3   -0.02    0.06
 -12  -8  -3   -0.01    0.05
  12   8   3    0.02    0.05
 -14  -8  -3   -0.06    0.06
 -14  -8  -3    0.05    0.06
 -14  -8  -3    0.06    0.06
  14   8   3    0.01    0.05
 -16  -8  -3    0.02    0.04
 -16  -8  -3    0.04    0.05
 -16  -8  -3   -0.09    0.06
 -16  -8  -3    0.09    0.06
  16   8   3    0.02    0.05
 -18  -8  -3    0.04    0.04
 -18  -8  -3    0.01    0.04
 -18  -8  -3    0.05    0.06
 -18  -8  -3    0.01    0.06
  18   8   3   -0.01    0.04
 -20  -8  -3   -0.05    0.06
 -20  -8  -3    0.01    0.03
 -20  -8  -3   -0.01    0.04
  20   8   3    0.03    0.04
 -22  -8  -3    0.06    0.04
 -22  -8  -3   -0.01    0.05
 -22  -8  -3    0.05    0.03
  22   8   3    0.04    0.04
 -21  -9   3   -0.02    0.03
 -21  -9   3    0.02    0.04
 -21  -9   3    0.01    0.05
 -21   9   3   -0.05    0.03
  21   9  -3   -0.01    0.03
 -19  -9   3    0.04    0.06
 -19  -9   3    0.01    0.04
 -19  -9   3    0.01    0.05
  19   9  -3    0.00    0.03
 -19   9   3    0.02    0.04
 -17  -9   3   -0.01    0.06
 -17  -9   3    0.14    0.06
 -17  -9   3    0.05    0.05
  17   9  -3    0.06    0.04
 -17   9   3    0.05    0.04
 -15  -9   3    0.00    0.05
 -15  -9   3    0.02    0.06
  15   9  -3    0.02    0.04
 -15   9   3   -0.05    0.04
 -13  -9   3    0.01    0.06
 -13   9   3    0.05    0.05
  13   9  -3    0.04    0.05
 -11  -9   3    0.09    0.07
 -11   9   3    0.25    0.05
  11   9  -3    0.22    0.06
 -11   9   3    0.15    0.06
  -9  -9   3    0.04    0.06
   9   9  -3   -0.02    0.04
  -9   9   3    0.00    0.05
  -9   9   3    0.11    0.05
  -7  -9   3    0.39    0.10
   7   9  -3    0.34    0.07
  -7   9   3    0.63    0.09
  -7   9   3    0.32    0.08
  -5  -9   3    0.34    0.09
  -5   9   3    0.51    0.10
  -5   9   3    0.26    0.08
  -3  -9   3    0.31    0.09
  -3   9   3    0.27    0.09
  -3   9   3    0.42    0.09
   3   9  -3    0.30    0.09
   3   9  -3    0.28    0.07
  -1  -9   3    0.02    0.06
   1   9  -3    0.10    0.07
   1   9  -3    0.15    0.06
  -1   9   3    0.24    0.07
   1  -9   3   -0.05    0.06
  -1  -9  -3    0.01    0.07
  -1   9  -3    0.02    0.06
  -1   9  -3    0.06    0.05
   1   9   3    0.07    0.06
   3  -9   3    0.08    0.07
  -3  -9  -3    0.05    0.07
  -3   9  -3   -0.05    0.05
  -3   9  -3    0.02    0.05
  -3   9  -3    0.00    0.07
   3   9   3   -0.01    0.05
  -5  -9  -3    0.32    0.09
  -5   9  -3    0.34    0.06
  -5   9  -3    0.42    0.09
   5   9   3    0.19    0.07
  -7  -9  -3    0.28    0.09
  -7   9  -3    0.76    0.10
   7   9   3    0.57    0.09
  -9  -9  -3    0.36    0.08
  -9  -9  -3    0.20    0.08
  -9   9  -3    0.14    0.06
   9   9   3    0.25    0.07
 -11  -9  -3    0.27    0.07
 -11  -9  -3    0.12    0.07
  11   9   3    0.19    0.06
 -13  -9  -3    0.01    0.05
 -13  -9  -3    0.15    0.08
  13   9   3    0.04    0.04
 -15  -9  -3    0.07    0.04
 -15  -9  -3   -0.04    0.05
  15   9   3    0.04    0.04
 -17  -9  -3    0.10    0.06
  17   9   3    0.15    0.05
 -19  -9  -3    0.04    0.05
 -16 -10   3    0.02    0.04
 -16 -10   3   -0.03    0.03
 -16  10   3    0.06    0.03
  16  10  -3    0.02    0.03
 -14 -10   3    0.01    0.05
 -14 -10   3   -0.04    0.04
 -14  10   3    0.00    0.03
  14  10  -3    0.01    0.03
 -12 -10   3    0.04    0.05
 -12  10   3   -0.02    0.03
  12  10  -3    0.01    0.04
 -10 -10   3    0.06    0.06
  10  10  -3    0.05    0.04
 -10  10   3    0.05    0.04
  -8 -10   3    0.00    0.05
  -8  10   3    0.00    0.03
   8  10  -3    0.02    0.06
   8  10  -3    0.01    0.04
  -8  10   3    0.03    0.04
  -6 -10   3    0.02    0.06
  -6  10   3    0.02    0.04
  -6  10   3    0.05    0.04
   6  10  -3    0.10    0.06
   6  10  -3    0.00    0.04
  -4 -10   3    0.21    0.07
  -4  10   3    0.11    0.05
   4  10  -3    0.08    0.05
  -4  10   3    0.26    0.06
   4  10  -3    0.19    0.07
  -2 -10   3    0.11    0.07
   2  10  -3    0.15    0.05
  -2  10   3    0.22    0.06
  -2  10   3    0.09    0.06
   2  10  -3    0.07    0.05
   0 -10   3    0.04    0.06
   0  10   3   -0.04    0.04
   0  10   3   -0.08    0.06
   0  10  -3   -0.05    0.04
   0  10  -3   -0.02    0.04
   2 -10   3    0.02    0.05
  -2 -10  -3    0.05    0.06
  -2  10  -3    0.03    0.06
   2  10   3    0.02    0.07
  -2  10  -3   -0.01    0.04
   2  10   3    0.04    0.05
  -2  10  -3   -0.02    0.04
  -4 -10  -3    0.12    0.07
   4  10   3    0.12    0.05
  -4  10  -3    0.09    0.06
  -6 -10  -3    0.04    0.06
   6  10   3    0.01    0.04
  -8 -10  -3    0.10    0.06
  -8 -10  -3   -0.02    0.05
   8  10   3    0.06    0.04
 -10 -10  -3    0.33    0.07
 -10 -10  -3    0.18    0.06
  10  10   3    0.26    0.06
 -12 -10  -3    0.36    0.07
 -12 -10  -3    0.33    0.06
  12  10   3    0.39    0.06
 -14 -10  -3    0.03    0.04
  -7 -11   3    0.07    0.04
  -5 -11   3    0.17    0.05
  -5  11   3    0.12    0.04
   5  11  -3    0.22    0.04
   3  11  -3    0.03    0.03
  -3  11   3    0.07    0.03
  -3  11   3    0.01    0.03
  -1  11   3    0.07    0.04
  -1  11   3    0.06    0.03
   1  11   3    0.06    0.04
   1  11   3   -0.01    0.03
   3  11   3    0.09    0.04
 -36   0   4    0.05    0.04
 -36   0   4    0.06    0.03
 -34   0   4    0.15    0.06
 -34   0   4    0.05    0.04
 -32   0   4    0.48    0.09
 -32   0   4    0.61    0.08
 -32   0   4    0.56    0.10
 -30   0   4    0.16    0.08
 -30   0   4    0.10    0.05
 -30   0   4    0.02    0.06
 -28   0   4    0.78    0.12
 -28   0   4    0.71    0.11
 -28   0   4    0.64    0.09
 -26   0   4    1.21    0.15
 -26   0   4    1.24    0.15
 -26   0   4    1.45    0.14
 -24   0   4    3.00    0.23
 -22   0   4    0.42    0.09
 -22   0   4    0.41    0.09
 -20   0   4    0.66    0.10
 -20   0   4    0.99    0.12
 -20   0   4    0.92    0.10
 -18   0   4    0.77    0.10
 -18   0   4    0.88    0.10
 -18   0   4    0.76    0.09
 -16   0   4   32.90    1.39
 -16   0   4   32.66    1.50
 -16   0   4   34.59    1.45
 -14   0   4    1.67    0.11
 -14   0   4    1.46    0.11
 -14   0   4    1.82    0.15
 -12   0   4   73.29    2.88
 -12   0   4   68.74    2.98
 -10   0   4    6.92    0.33
  10   0  -4    6.99    0.34
 -10   0   4    7.73    0.32
 -10   0   4    7.55    0.34
 -10   0   4    7.32    0.35
  -8   0   4   73.98    2.91
  -8   0   4   72.13    3.12
   8   0  -4   69.74    3.13
  -8   0   4   70.10    3.10
  -8   0   4   74.04    3.01
  -6   0   4  296.70   13.60
   6   0  -4  326.72   13.69
  -6   0   4  317.34   13.15
  -6   0   4  309.68   12.70
  -6   0   4  331.56   13.61
  -4   0   4    1.45    0.07
  -4   0   4    1.26    0.08
   4   0  -4    1.50    0.09
  -4   0   4    1.38    0.07
  -4   0   4    1.28    0.07
  -2   0   4   31.14    1.35
   0   0   4   48.17    2.05
   0   0   4   49.92    1.98
   2   0   4    3.09    0.16
   2   0   4    3.11    0.15
  -4   0  -4    2.07    0.11
   4   0   4    1.91    0.11
  -4   0  -4    1.93    0.10
  -6   0  -4   54.78    2.39
  -6   0  -4   55.82    2.33
  -8   0  -4    0.75    0.07
  -8   0  -4    0.62    0.07
 -10   0  -4   10.86    0.61
 -10   0  -4   10.84    0.50
 -10   0  -4   11.35    0.51
 -12   0  -4    0.17    0.07
 -12   0  -4    0.21    0.05
 -12   0  -4    0.16    0.04
 -14   0  -4    2.42    0.16
 -14   0  -4    2.43    0.20
 -16   0  -4   21.75    1.17
 -16   0  -4   21.84    0.97
 -37  -1   4    0.19    0.04
 -37  -1   4    0.12    0.04
 -37   1   4    0.16    0.04
 -35  -1   4    0.26    0.06
 -35  -1   4    0.17    0.04
 -35  -1   4    0.21    0.07
 -35   1   4    0.17    0.04
 -33  -1   4    0.01    0.06
 -33  -1   4   -0.04    0.04
 -33  -1   4    0.01    0.03
 -33   1   4   -0.03    0.03
 -33   1   4   -0.02    0.05
 -31  -1   4    0.28    0.09
 -31  -1   4    0.23    0.07
 -31  -1   4    0.27    0.06
 -31   1   4    0.38    0.07
 -31   1   4    0.20    0.07
 -29  -1   4    0.40    0.09
 -29  -1   4    0.31    0.07
 -29  -1   4    0.41    0.09
 -29   1   4    0.57    0.09
 -29   1   4    0.42    0.10
 -27  -1   4    0.63    0.09
 -27  -1   4    0.58    0.11
 -27  -1   4    0.43    0.10
 -27   1   4    0.48    0.10
 -27   1   4    0.59    0.09
 -25  -1   4    0.25    0.06
 -25  -1   4    0.19    0.08
 -25  -1   4    0.25    0.08
 -25  -1   4    0.14    0.08
 -25   1   4    0.27    0.07
 -23  -1   4    1.10    0.14
 -23  -1   4    1.28    0.15
 -23   1   4    0.84    0.13
 -21  -1   4    1.75    0.17
 -21  -1   4    1.90    0.17
 -21   1   4    1.73    0.17
 -19  -1   4    1.11    0.13
 -19  -1   4    1.03    0.12
 -19  -1   4    1.36    0.13
 -19   1   4    1.15    0.13
 -17  -1   4    1.93    0.17
 -17  -1   4    1.82    0.15
 -17  -1   4    1.90    0.15
 -17   1   4    1.61    0.15
 -17   1   4    1.91    0.13
 -15  -1   4    4.51    0.24
 -15  -1   4    4.13    0.24
 -15  -1   4    4.06    0.22
 -15   1   4    4.31    0.22
 -15   1   4    4.30    0.21
 -15   1   4    4.27    0.25
 -13  -1   4    1.48    0.11
 -13  -1   4    1.38    0.11
 -13  -1   4    1.31    0.09
 -13  -1   4    0.99    0.11
 -13   1   4    1.37    0.09
 -13   1   4    1.45    0.10
 -13   1   4    1.46    0.12
 -11  -1   4   25.47    1.04
 -11  -1   4   24.57    1.07
 -11  -1   4   25.55    1.11
 -11  -1   4   24.10    1.09
 -11   1   4   24.53    1.11
 -11   1   4   24.83    1.02
 -11   1   4   24.96    1.06
  -9  -1   4   21.15    0.93
   9  -1  -4   20.82    0.94
  -9  -1   4   21.09    0.95
  -9  -1   4   21.52    0.88
  -9   1   4   21.64    0.87
  -9   1   4   21.78    0.91
   9   1  -4   21.02    0.95
  -9   1   4   20.55    0.95
  -7  -1   4   13.21    0.58
  -7  -1   4   12.68    0.57
  -7  -1   4   13.04    0.56
   7  -1  -4   12.43    0.58
  -7   1   4   12.64    0.53
  -7   1   4   12.06    0.55
  -7   1   4   12.91    0.58
   7   1  -4   13.48    0.59
  -5  -1   4    5.25    0.24
   5  -1  -4    5.28    0.25
  -5  -1   4    5.26    0.25
  -5  -1   4    5.11    0.25
  -5  -1   4    5.42    0.23
  -5   1   4    5.17    0.25
  -5   1   4    5.44    0.23
   5   1  -4    5.06    0.26
  -5   1   4    5.33    0.24
  -3  -1   4    3.04    0.15
  -3  -1   4    3.09    0.15
  -3  -1   4    3.06    0.15
  -3  -1   4    3.32    0.14
   3  -1  -4    3.10    0.16
  -3   1   4    2.93    0.15
  -3   1   4    3.01    0.14
  -3   1   4    3.03    0.14
   1  -1  -4    7.37    0.34
  -1  -1   4    7.57    0.31
  -1  -1   4    7.41    0.32
  -1  -1   4    7.79    0.34
  -1  -1   4    7.39    0.34
  -1   1   4    7.31    0.32
  -1   1   4    7.42    0.33
   1  -1   4   15.34    0.66
   1  -1   4   15.26    0.61
   1  -1   4   14.48    0.63
   1  -1   4   13.82    0.65
  -1  -1  -4   14.55    0.65
   1   1   4   15.04    0.63
   3  -1   4    9.67    0.41
  -3  -1  -4    8.64    0.41
   3  -1   4    9.35    0.43
   3  -1   4    9.58    0.39
   3  -1   4    9.49    0.42
   5  -1   4   13.10    0.60
   5  -1   4   12.58    0.59
  -5  -1  -4   13.41    0.58
   5  -1   4   13.50    0.55
  -5  -1  -4   12.97    0.58
   5  -1   4   13.45    0.57
  -7  -1  -4    0.86    0.08
   7  -1   4    0.94    0.06
   7  -1   4    0.94    0.07
  -7  -1  -4    0.90    0.07
   7  -1   4    0.92    0.09
   9  -1   4    5.72    0.28
  -9  -1  -4    6.15    0.29
  -9  -1  -4    6.10    0.30
  -9   1  -4    6.26    0.28
  11  -1   4    3.25    0.17
 -11  -1  -4    2.84    0.23
 -11  -1  -4    3.20    0.18
 -11   1  -4    3.18    0.17
 -13  -1  -4    0.05    0.06
 -13  -1  -4   -0.02    0.03
  13  -1   4    0.00    0.03
 -15  -1  -4    5.76    0.31
 -15  -1  -4    5.94    0.38
 -17  -1  -4    1.06    0.12
 -17  -1  -4    0.98    0.15
 -19  -1  -4    1.28    0.13
 -19  -1  -4    1.16    0.16
 -21  -1  -4    0.17    0.10
 -21  -1  -4    0.15    0.07
 -23  -1  -4    0.06    0.06
 -36  -2   4    0.07    0.03
 -36  -2   4    0.01    0.05
 -36  -2   4    0.03    0.04
 -36   2   4    0.04    0.03
 -34  -2   4    0.02    0.04
 -34  -2   4    0.03    0.05
 -34  -2   4    0.08    0.04
 -34   2   4    0.06    0.04
 -32  -2   4    0.23    0.08
 -32  -2   4    0.24    0.07
 -32  -2   4    0.21    0.05
 -32   2   4    0.14    0.05
 -30  -2   4    0.88    0.12
 -30  -2   4    0.98    0.13
 -30  -2   4    1.04    0.10
 -30   2   4    0.79    0.10
 -28  -2   4    0.27    0.08
 -28  -2   4    0.11    0.05
 -28  -2   4    0.16    0.07
 -28   2   4    0.11    0.06
 -26  -2   4    2.35    0.21
 -26  -2   4    2.38    0.21
 -26  -2   4    2.34    0.16
 -26   2   4    2.28    0.19
 -24  -2   4    0.02    0.07
 -24  -2   4   -0.04    0.05
 -22  -2   4    1.45    0.17
 -22  -2   4    1.87    0.18
 -22   2   4    1.89    0.18
 -20  -2   4    2.00    0.19
 -20  -2   4    1.79    0.17
 -20   2   4    1.94    0.18
 -18  -2   4    1.36    0.13
 -18  -2   4    0.98    0.12
 -18  -2   4    1.42    0.14
 -18   2   4    1.47    0.14
 -16  -2   4    2.92    0.19
 -16  -2   4    3.57    0.20
 -16  -2   4    3.29    0.21
 -16  -2   4    3.65    0.22
 -16   2   4    3.41    0.21
 -14  -2   4    1.66    0.14
 -14  -2   4    1.83    0.13
 -14  -2   4    1.67    0.12
 -14  -2   4    1.59    0.14
 -14   2   4    1.71    0.14
 -12  -2   4   18.46    0.78
 -12  -2   4   16.90    0.76
 -12  -2   4   16.57    0.79
 -12  -2   4   16.43    0.73
 -12   2   4   17.07    0.79
 -10  -2   4    5.54    0.27
 -10  -2   4    5.41    0.28
 -10  -2   4    5.81    0.29
 -10  -2   4    5.41    0.28
 -10   2   4    5.13    0.28
 -10   2   4    6.14    0.25
 -10   2   4    5.96    0.26
  -8  -2   4   31.01    1.27
  -8  -2   4   28.29    1.27
  -8  -2   4   27.71    1.19
  -8  -2   4   28.82    1.23
  -8   2   4   27.64    1.21
  -8   2   4   29.63    1.27
  -8   2   4   28.35    1.17
   6  -2  -4   28.89    1.29
  -6  -2   4   29.46    1.28
  -6  -2   4   28.95    1.24
  -6  -2   4   29.10    1.28
  -6  -2   4   29.66    1.20
  -6   2   4   29.64    1.18
  -6   2   4   28.18    1.23
  -4  -2   4   14.61    0.65
  -4  -2   4   14.56    0.65
  -4  -2   4   14.74    0.62
   4  -2  -4   13.81    0.65
  -4  -2   4   14.73    0.60
  -4   2   4   14.54    0.62
  -4   2   4   14.08    0.59
  -2  -2   4    2.20    0.12
  -2  -2   4    2.09    0.11
  -2  -2   4    2.14    0.11
   2  -2  -4    2.24    0.12
   2  -2  -4    2.17    0.12
  -2  -2   4    2.02    0.12
  -2   2   4    2.03    0.11
  -2   2   4    2.02    0.10
   0  -2  -4    9.87    0.47
   0  -2   4   10.38    0.45
   0  -2   4   10.36    0.43
   0  -2   4   10.67    0.48
   0  -2   4   10.87    0.48
   0   2   4   10.48    0.46
   2  -2   4   17.88    0.77
  -2  -2  -4   16.58    0.76
   2  -2   4   16.76    0.73
  -2  -2  -4   18.02    0.75
   2  -2   4   17.10    0.71
  -2  -2  -4   18.23    0.76
   2  -2   4   16.64    0.77
  -4  -2  -4   33.62    1.43
   4  -2   4   34.79    1.47
   4  -2   4   32.93    1.47
   4  -2   4   32.57    1.40
   4  -2   4   33.26    1.36
  -4  -2  -4   33.60    1.46
  -6  -2  -4   20.08    0.91
   6  -2   4   20.95    0.92
   6  -2   4   20.16    0.93
  -6  -2  -4   21.39    0.90
   6  -2   4   20.42    0.84
   8  -2   4    6.06    0.30
   8  -2   4    6.42    0.32
  -8  -2  -4    5.88    0.31
  10  -2   4    9.07    0.42
 -10  -2  -4    9.17    0.43
  10  -2   4    8.41    0.44
 -12  -2  -4    0.73    0.12
  12  -2   4    0.85    0.10
 -12  -2  -4    0.80    0.10
  12  -2   4    1.05    0.09
  14  -2   4    1.88    0.17
 -14  -2  -4    1.47    0.14
 -14  -2  -4    1.49    0.17
 -16  -2  -4    5.64    0.32
 -16  -2  -4    5.96    0.39
 -18  -2  -4    0.15    0.10
 -18  -2  -4    0.29    0.08
 -20  -2  -4    1.24    0.14
 -20  -2  -4    1.66    0.20
 -22  -2  -4    0.10    0.06
 -22  -2  -4    0.14    0.08
 -22  -2  -4    0.14    0.06
 -22  -2  -4    0.09    0.10
 -24  -2  -4    0.10    0.06
 -24  -2  -4    0.03    0.05
 -26  -2  -4    0.31    0.07
 -26  -2  -4    0.10    0.05
 -28  -2  -4    0.07    0.05
 -28  -2  -4    0.11    0.06
 -35  -3   4    0.08    0.04
 -35  -3   4    0.14    0.05
 -35  -3   4    0.12    0.03
 -35   3   4    0.11    0.04
 -33  -3   4    0.16    0.04
 -33  -3   4    0.01    0.05
 -33  -3   4    0.11    0.05
 -33   3   4    0.11    0.05
 -31  -3   4    0.18    0.07
 -31  -3   4    0.18    0.05
 -31  -3   4    0.10    0.05
 -31   3   4    0.06    0.05
 -29  -3   4    0.01    0.05
 -29  -3   4    0.02    0.04
 -29  -3   4    0.04    0.06
 -29   3   4   -0.05    0.05
 -27  -3   4    0.15    0.07
 -27  -3   4    0.07    0.05
 -27  -3   4    0.03    0.06
 -27   3   4    0.14    0.07
 -25  -3   4    2.14    0.14
 -25  -3   4    1.83    0.18
 -25  -3   4    2.02    0.11
 -25  -3   4    1.89    0.18
 -25   3   4    1.94    0.17
 -23  -3   4    1.69    0.12
 -23  -3   4    1.72    0.17
 -23  -3   4    2.04    0.18
 -23  -3   4    1.79    0.14
 -23   3   4    2.02    0.18
  21  -3  -4    0.13    0.08
 -21  -3   4    0.20    0.08
 -21  -3   4    0.16    0.07
 -19  -3   4    0.29    0.08
 -19  -3   4    0.53    0.10
  19  -3  -4    0.36    0.10
 -17  -3   4    1.63    0.16
  17  -3  -4    1.86    0.18
 -17  -3   4    1.80    0.17
 -17  -3   4    1.72    0.16
 -17  -3   4    1.57    0.15
 -15  -3   4    1.82    0.16
 -15  -3   4    2.01    0.17
 -15  -3   4    1.72    0.15
 -15  -3   4    1.52    0.14
  15  -3  -4    1.89    0.18
 -13  -3   4    3.29    0.20
 -13  -3   4    3.15    0.19
  13  -3  -4    3.26    0.21
 -13  -3   4    3.08    0.20
 -13  -3   4    3.16    0.20
 -11  -3   4    0.38    0.06
  11  -3  -4    0.34    0.07
 -11  -3   4    0.59    0.08
 -11  -3   4    0.52    0.07
 -11  -3   4    0.41    0.06
  -9  -3   4   20.33    0.89
  -9  -3   4   18.19    0.86
   9  -3  -4   20.19    0.90
  -9  -3   4   19.47    0.83
  -9  -3   4   19.98    0.89
  -7  -3   4    6.97    0.34
  -7  -3   4    6.65    0.34
   7  -3  -4    6.95    0.35
  -7  -3   4    6.96    0.33
  -7  -3   4    6.96    0.32
  -5  -3   4    1.51    0.11
  -5  -3   4    1.48    0.10
  -5  -3   4    1.64    0.10
   5  -3  -4    1.58    0.11
  -5  -3   4    1.69    0.11
  -5   3   4    1.58    0.09
  -5   3   4    1.52    0.08
   3  -3  -4   11.96    0.55
  -3  -3   4   11.65    0.51
  -3  -3   4   11.85    0.52
  -3  -3   4   12.26    0.55
  -3  -3   4   11.82    0.55
  -3   3   4   11.62    0.50
  -3   3   4   12.17    0.52
  -1  -3   4   13.09    0.58
  -1  -3   4   12.25    0.55
  -1  -3   4   12.67    0.53
  -1  -3   4   13.48    0.58
   1  -3  -4   12.71    0.58
  -1   3   4   12.12    0.55
   1  -3   4    6.97    0.30
   1  -3   4    7.08    0.34
  -1  -3  -4    7.04    0.33
  -1  -3  -4    7.13    0.33
  -1  -3  -4    6.55    0.33
   1  -3   4    6.91    0.34
   1   3   4    7.31    0.32
  -3  -3  -4   36.31    1.55
   3  -3   4   35.61    1.56
   3  -3   4   34.98    1.56
  -3  -3  -4   34.73    1.51
  -3  -3  -4   35.37    1.55
  -5  -3  -4    2.11    0.13
   5  -3   4    2.00    0.12
   5  -3   4    2.16    0.14
  -5  -3  -4    1.96    0.13
   7  -3   4    3.58    0.19
  -7  -3  -4    3.65    0.21
   7  -3   4    3.51    0.21
   9  -3   4    3.28    0.18
  -9  -3  -4    3.54    0.20
   9  -3   4    3.17    0.20
 -11  -3  -4    0.52    0.11
  11  -3   4    0.57    0.07
 -11  -3  -4    0.60    0.08
  11  -3   4    0.31    0.07
 -13  -3  -4    4.23    0.31
  13  -3   4    4.24    0.26
 -13  -3  -4    3.84    0.25
 -15  -3  -4    1.74    0.17
  15  -3   4    2.85    0.22
 -15  -3  -4    2.20    0.23
 -17  -3  -4    0.16    0.07
 -17  -3  -4    0.24    0.10
 -17  -3  -4    0.15    0.07
 -19  -3  -4    0.52    0.10
 -19  -3  -4    0.64    0.10
 -19  -3  -4    0.70    0.14
 -21  -3  -4    0.21    0.08
 -21  -3  -4    0.14    0.06
 -21  -3  -4    0.10    0.06
 -21  -3  -4    0.16    0.10
 -23  -3  -4    0.42    0.09
 -23  -3  -4    0.22    0.07
 -23  -3  -4    0.11    0.06
 -23  -3  -4    0.21    0.11
 -25  -3  -4    0.02    0.04
 -25  -3  -4    0.01    0.05
 -25  -3  -4    0.03    0.07
 -27  -3  -4    0.56    0.09
 -27  -3  -4    0.73    0.10
 -29  -3  -4    0.19    0.05
 -29  -3  -4    0.22    0.06
 -31  -3  -4    0.01    0.04
 -31  -3  -4    0.02    0.03
 -34  -4   4    0.08    0.03
 -34  -4   4    0.10    0.04
 -34  -4   4    0.11    0.05
 -34   4   4    0.14    0.04
 -32  -4   4    0.53    0.06
 -32  -4   4    0.52    0.08
 -32  -4   4    0.44    0.08
 -32   4   4    0.38    0.07
 -30  -4   4    0.28    0.07
 -30  -4   4    0.42    0.09
 -30  -4   4    0.26    0.06
 -30  -4   4    0.29    0.09
 -30   4   4    0.33    0.07
 -28  -4   4    0.21    0.06
 -28  -4   4    0.20    0.07
 -28  -4   4    0.21    0.09
 -28  -4   4    0.23    0.07
 -28   4   4    0.15    0.07
 -26  -4   4    0.80    0.12
 -26  -4   4    0.52    0.10
 -26  -4   4    0.59    0.12
 -26  -4   4    0.54    0.08
 -26   4   4    0.69    0.11
 -24  -4   4    0.23    0.09
 -24  -4   4    0.39    0.09
 -24  -4   4    0.43    0.07
 -24  -4   4    0.44    0.07
 -24  -4   4    0.47    0.09
 -24   4   4    0.48    0.10
 -22  -4   4    0.06    0.07
 -22  -4   4    0.12    0.08
 -22  -4   4    0.07    0.05
 -22  -4   4    0.04    0.05
 -22  -4   4    0.11    0.06
 -22   4   4    0.11    0.07
 -20  -4   4    0.37    0.09
  20  -4  -4    0.57    0.12
 -20  -4   4    0.38    0.09
 -20  -4   4    0.20    0.08
  18  -4  -4    0.11    0.07
 -18  -4   4    0.04    0.06
 -18  -4   4    0.16    0.08
 -18  -4   4    0.10    0.06
 -16  -4   4    0.39    0.08
 -16  -4   4    0.38    0.08
 -16  -4   4    0.16    0.08
  16  -4  -4    0.25    0.08
 -14  -4   4    1.27    0.13
 -14  -4   4    1.31    0.15
 -14  -4   4    1.40    0.14
  14  -4  -4    1.15    0.14
 -14  -4   4    1.18    0.13
 -12  -4   4    0.74    0.09
 -12  -4   4    0.98    0.12
 -12  -4   4    0.94    0.12
  12  -4  -4    0.80    0.11
 -12  -4   4    0.93    0.11
 -10  -4   4    1.58    0.14
  10  -4  -4    1.70    0.15
 -10  -4   4    1.53    0.13
 -10  -4   4    1.58    0.14
 -10  -4   4    1.43    0.13
  -8  -4   4    0.20    0.05
   8  -4  -4    0.31    0.06
  -8  -4   4    0.35    0.06
  -8  -4   4    0.31    0.06
  -8  -4   4    0.36    0.07
  -6  -4   4    2.83    0.16
  -6  -4   4    2.90    0.18
  -6  -4   4    2.79    0.18
   6  -4  -4    3.06    0.18
  -6  -4   4    2.76    0.16
  -4  -4   4    5.58    0.30
  -4  -4   4    5.72    0.27
   4  -4  -4    5.45    0.29
  -4  -4   4    5.91    0.30
   4  -4  -4    5.92    0.29
  -2  -4   4    1.55    0.11
   2  -4  -4    1.49    0.12
   2  -4  -4    1.73    0.12
  -2  -4   4    1.58    0.12
   0  -4  -4    6.43    0.33
   0  -4   4    6.65    0.33
   0  -4   4    6.99    0.34
   0   4   4    6.76    0.31
   2  -4   4   24.22    1.09
  -2  -4  -4   24.43    1.06
   2  -4   4   24.59    1.10
  -2  -4  -4   24.67    1.09
  -2  -4  -4   22.81    1.09
   2   4   4   25.26    1.05
  -4  -4  -4    1.20    0.11
  -4  -4  -4    1.22    0.11
   4  -4   4    1.47    0.10
  -4  -4  -4    1.25    0.08
   4  -4   4    1.08    0.11
   6  -4   4    4.74    0.24
   6  -4   4    4.47    0.26
  -6  -4  -4    4.54    0.25
   8  -4   4    6.41    0.35
  -8  -4  -4    6.83    0.35
   8  -4   4    6.49    0.33
 -10  -4  -4    0.65    0.13
 -10  -4  -4    0.81    0.11
  10  -4   4    0.60    0.09
 -12  -4  -4    2.48    0.25
  12  -4   4    2.79    0.19
 -12  -4  -4    2.54    0.19
 -14  -4  -4    0.73    0.14
 -14  -4  -4    0.84    0.12
  14  -4   4    0.85    0.12
 -16  -4  -4    1.00    0.17
 -16  -4  -4    1.01    0.12
  16  -4   4    1.28    0.16
 -16  -4  -4    1.04    0.13
 -18  -4  -4    1.65    0.15
 -18  -4  -4    1.50    0.19
 -18  -4  -4    1.22    0.15
 -18  -4  -4    1.71    0.16
 -18  -4  -4    1.71    0.21
 -20  -4  -4    0.13    0.06
 -20  -4  -4    0.12    0.06
 -20  -4  -4    0.25    0.09
 -20  -4  -4    0.12    0.10
 -20  -4  -4    0.31    0.11
 -22  -4  -4    0.88    0.12
 -22  -4  -4    0.75    0.11
 -22  -4  -4    0.64    0.15
 -22  -4  -4    0.70    0.12
 -24  -4  -4    0.28    0.07
 -24  -4  -4    0.22    0.07
 -24  -4  -4    0.26    0.08
 -26  -4  -4    0.12    0.05
 -26  -4  -4    0.16    0.06
 -26  -4  -4    0.15    0.07
 -28  -4  -4   -0.04    0.05
 -28  -4  -4   -0.06    0.03
 -28  -4  -4   -0.04    0.04
 -30  -4  -4    0.02    0.03
 -30  -4  -4    0.05    0.05
 -30  -4  -4    0.03    0.04
 -33  -5   4    0.09    0.04
 -33  -5   4    0.08    0.04
 -33  -5   4    0.09    0.03
 -33   5   4    0.12    0.04
 -31  -5   4    0.10    0.06
 -31  -5   4    0.17    0.04
 -31  -5   4    0.12    0.05
 -31  -5   4    0.12    0.05
 -31   5   4    0.05    0.04
 -29  -5   4    0.12    0.07
 -29  -5   4    0.10    0.04
 -29  -5   4    0.07    0.05
 -29  -5   4    0.10    0.06
 -29   5   4    0.20    0.06
 -27  -5   4    0.49    0.09
 -27  -5   4    0.61    0.08
 -27  -5   4    0.50    0.11
 -27  -5   4    0.48    0.09
 -27   5   4    0.51    0.09
 -25  -5   4    1.16    0.11
 -25  -5   4    1.30    0.15
 -25  -5   4    1.35    0.16
 -25  -5   4    1.27    0.14
 -25  -5   4    1.05    0.09
 -25   5   4    0.81    0.12
 -23  -5   4    0.25    0.06
 -23  -5   4    0.18    0.09
 -23  -5   4    0.61    0.10
 -23  -5   4    0.32    0.08
 -23  -5   4    0.36    0.07
 -23   5   4    0.33    0.09
 -21  -5   4    0.10    0.07
 -21  -5   4    0.19    0.07
 -21  -5   4    0.11    0.06
 -21  -5   4    0.07    0.08
 -21  -5   4    0.16    0.05
 -21   5   4    0.15    0.07
 -19  -5   4    1.94    0.15
 -19  -5   4    1.69    0.14
 -19  -5   4    2.08    0.18
 -19   5   4    1.98    0.18
 -17  -5   4    1.56    0.17
  17  -5  -4    2.15    0.21
 -17  -5   4    1.83    0.20
 -17  -5   4    1.57    0.18
 -15  -5   4    0.07    0.07
 -15  -5   4    0.14    0.07
 -15  -5   4    0.07    0.06
  15  -5  -4    0.05    0.06
  13  -5  -4    0.69    0.11
 -13  -5   4    0.64    0.10
 -13  -5   4    0.58    0.11
 -13  -5   4    0.74    0.11
 -11  -5   4    1.15    0.12
  11  -5  -4    1.18    0.13
 -11  -5   4    1.18    0.14
 -11  -5   4    1.04    0.13
  -9  -5   4    1.54    0.15
  -9  -5   4    1.16    0.13
  -9  -5   4    1.28    0.12
   9  -5  -4    1.64    0.15
  -7  -5   4    2.88    0.20
   7  -5  -4    3.56    0.21
  -7  -5   4    2.81    0.20
   5  -5  -4    1.54    0.13
  -5  -5   4    1.37    0.13
  -5  -5   4    1.40    0.13
  -3  -5   4   11.13    0.54
   3  -5  -4   11.36    0.54
  -3  -5   4   10.62    0.54
  -1  -5   4    6.23    0.33
   1  -5  -4    6.20    0.33
  -1  -5   4    6.17    0.33
  -1  -5  -4    2.67    0.17
   1  -5   4    2.47    0.16
   1  -5   4    2.38    0.17
  -1  -5  -4    2.11    0.15
   3  -5   4   11.60    0.58
   3  -5   4   12.06    0.57
  -3  -5  -4   11.74    0.55
   5  -5   4    0.18    0.05
   5  -5   4    0.19    0.06
  -5  -5  -4    0.25    0.06
   5   5   4    0.19    0.05
  -7  -5  -4    3.22    0.27
  -7  -5  -4    3.29    0.21
   7  -5   4    3.63    0.23
  -9  -5  -4    2.26    0.19
   9  -5   4    2.00    0.19
  11  -5   4    0.94    0.12
 -11  -5  -4    0.60    0.10
 -11  -5  -4    0.82    0.14
 -13  -5  -4    2.23    0.18
 -13  -5  -4    2.13    0.23
 -13  -5  -4    1.74    0.18
  13  -5   4    1.70    0.18
 -15  -5  -4    1.22    0.11
 -15  -5  -4    1.16    0.14
 -15  -5  -4    1.13    0.13
 -15  -5  -4    1.27    0.18
 -15  -5  -4    1.02    0.13
 -17  -5  -4    0.08    0.05
 -17  -5  -4    0.12    0.06
 -17  -5  -4    0.08    0.09
 -17  -5  -4    0.10    0.08
 -17  -5  -4    0.09    0.06
 -17  -5  -4    0.13    0.10
 -17  -5  -4    0.13    0.05
 -19  -5  -4    0.00    0.09
 -19  -5  -4    0.08    0.05
 -19  -5  -4    0.03    0.06
 -19  -5  -4    0.09    0.06
 -19  -5  -4   -0.02    0.07
 -19  -5  -4   -0.03    0.08
 -21  -5  -4    0.35    0.08
 -21  -5  -4    0.45    0.08
 -21  -5  -4    0.51    0.13
 -21  -5  -4    0.44    0.10
 -23  -5  -4    0.14    0.06
 -23  -5  -4    0.08    0.07
 -23  -5  -4    0.13    0.06
 -25  -5  -4    0.18    0.06
 -25  -5  -4    0.37    0.07
 -25  -5  -4    0.23    0.07
 -27  -5  -4   -0.01    0.05
 -27  -5  -4    0.14    0.04
 -27  -5  -4    0.02    0.04
 -29  -5  -4    0.06    0.03
 -29  -5  -4    0.01    0.04
 -29  -5  -4    0.17    0.04
 -32  -6   4    0.02    0.02
 -32  -6   4    0.02    0.04
 -30  -6   4    0.04    0.04
 -30  -6   4    0.05    0.05
 -30  -6   4    0.07    0.04
 -30  -6   4    0.04    0.03
 -30   6   4    0.12    0.04
 -28  -6   4    0.09    0.04
 -28  -6   4    0.09    0.06
 -28  -6   4    0.03    0.05
 -28  -6   4    0.03    0.04
 -28   6   4    0.13    0.05
 -26  -6   4   -0.04    0.05
 -26  -6   4    0.02    0.06
 -26  -6   4    0.15    0.05
 -26  -6   4    0.09    0.05
 -26   6   4    0.06    0.05
 -24  -6   4    0.14    0.06
 -24  -6   4    0.28    0.06
 -24  -6   4    0.18    0.05
 -24  -6   4    0.20    0.08
 -24  -6   4    0.26    0.08
 -24   6   4    0.31    0.08
 -22  -6   4    0.62    0.10
 -22  -6   4    0.48    0.11
 -22  -6   4    0.67    0.09
 -22  -6   4    0.44    0.07
 -22   6   4    0.79    0.12
 -20  -6   4    0.18    0.07
 -20  -6   4    0.10    0.08
 -20  -6   4    0.16    0.05
 -20   6   4    0.10    0.07
 -18  -6   4    0.09    0.05
 -18  -6   4   -0.03    0.07
 -18  -6   4    0.12    0.06
 -18  -6   4    0.07    0.09
 -18   6   4    0.01    0.06
 -16  -6   4    0.04    0.06
 -16  -6   4    0.10    0.05
 -16  -6   4   -0.05    0.08
 -16  -6   4    0.01    0.06
 -16   6   4   -0.03    0.06
 -16   6   4    0.02    0.04
 -14   6   4    0.97    0.10
 -14   6   4    0.96    0.13
 -12  -6   4    0.07    0.06
 -12  -6   4    0.09    0.07
  12  -6  -4   -0.03    0.05
 -10  -6   4    0.32    0.08
  10  -6  -4    0.46    0.09
 -10  -6   4    0.25    0.08
   8  -6  -4    0.19    0.07
  -8  -6   4    0.17    0.07
  -8  -6   4    0.24    0.08
  -6  -6   4    1.43    0.15
   6  -6  -4    1.28    0.14
  -6  -6   4    1.29    0.14
  -4  -6   4    0.17    0.06
   4  -6  -4    0.21    0.07
  -4  -6   4    0.20    0.07
  -2  -6   4    0.28    0.07
   2  -6  -4    0.42    0.08
  -2  -6   4    0.50    0.09
   0  -6  -4    0.26    0.06
   0  -6   4    0.14    0.06
   0  -6   4    0.30    0.07
   2  -6   4    1.71    0.15
   2  -6   4    1.43    0.15
  -2  -6  -4    1.42    0.13
   4  -6   4    1.27    0.14
   4  -6   4    1.20    0.13
  -4  -6  -4    1.11    0.10
   6  -6   4    0.91    0.12
  -8  -6  -4    1.79    0.21
   8  -6   4    2.55    0.21
 -10  -6  -4    1.00    0.12
 -10  -6  -4    0.89    0.11
 -10  -6  -4    1.15    0.17
 -10  -6  -4    0.91    0.11
 -10   6  -4    0.84    0.11
 -12  -6  -4    1.35    0.12
 -12  -6  -4    1.52    0.19
 -12  -6  -4    1.48    0.14
 -12  -6  -4    1.58    0.15
 -12  -6  -4    1.46    0.16
 -12  -6  -4    1.55    0.20
 -12  -6  -4    1.24    0.13
 -12   6  -4    1.30    0.12
 -14  -6  -4    0.06    0.06
 -14  -6  -4    0.06    0.08
 -14  -6  -4    0.04    0.06
 -14  -6  -4    0.13    0.07
 -14  -6  -4    0.03    0.09
 -14  -6  -4    0.04    0.05
 -14  -6  -4    0.06    0.06
 -16  -6  -4   -0.02    0.08
 -16  -6  -4    0.04    0.05
 -16  -6  -4    0.08    0.07
 -16  -6  -4   -0.04    0.08
 -16  -6  -4    0.05    0.04
 -16  -6  -4    0.04    0.05
 -16  -6  -4    0.04    0.06
 -18  -6  -4    0.23    0.08
 -18  -6  -4    0.29    0.11
 -18  -6  -4    0.20    0.05
 -18  -6  -4    0.24    0.07
 -18  -6  -4    0.22    0.05
 -18  -6  -4    0.14    0.10
 -18  -6  -4    0.28    0.07
 -20  -6  -4    0.07    0.05
 -20  -6  -4    0.06    0.06
 -20  -6  -4    0.11    0.04
 -20  -6  -4    0.16    0.06
 -20  -6  -4    0.38    0.11
 -22  -6  -4    0.62    0.09
 -22  -6  -4    0.45    0.08
 -22  -6  -4    0.55    0.10
 -22  -6  -4    0.38    0.11
 -22  -6  -4    0.36    0.06
 -24  -6  -4    0.08    0.05
 -24  -6  -4    0.04    0.07
 -24  -6  -4    0.10    0.06
 -24  -6  -4    0.11    0.05
 -26  -6  -4    0.12    0.04
 -26  -6  -4    0.07    0.05
 -26  -6  -4    0.14    0.04
 -28  -6  -4    0.02    0.03
 -28  -6  -4   -0.03    0.04
 -29  -7   4    0.12    0.03
 -29  -7   4    0.13    0.05
 -29   7   4    0.07    0.03
 -27  -7   4    0.30    0.05
 -27  -7   4    0.42    0.08
 -27   7   4    0.45    0.07
 -25  -7   4    0.60    0.10
 -25  -7   4    0.50    0.07
 -25   7   4    0.48    0.08
 -23  -7   4    0.37    0.06
 -23  -7   4    0.27    0.08
 -23  -7   4    0.28    0.06
 -23   7   4    0.44    0.08
 -21  -7   4    0.39    0.09
 -21  -7   4    0.29    0.06
 -21  -7   4    0.51    0.08
 -21   7   4    0.40    0.09
 -19  -7   4    2.43    0.23
 -19  -7   4    2.13    0.19
 -19  -7   4    2.19    0.17
 -19  -7   4    2.03    0.14
 -19   7   4    2.00    0.19
 -17  -7   4    1.16    0.14
 -17  -7   4    1.29    0.16
 -17  -7   4    1.28    0.12
 -17  -7   4    1.46    0.14
 -17   7   4    1.33    0.15
 -15  -7   4    2.86    0.18
 -15  -7   4    2.99    0.22
 -15  -7   4    3.14    0.27
 -15   7   4    3.19    0.17
 -15   7   4    3.28    0.22
 -13  -7   4    0.57    0.12
 -13  -7   4    0.73    0.09
 -13  -7   4    0.51    0.10
 -13   7   4    0.58    0.11
 -13   7   4    0.63    0.09
 -11  -7   4    2.01    0.14
 -11  -7   4    2.49    0.20
 -11  -7   4    1.76    0.19
 -11   7   4    2.24    0.19
 -11   7   4    2.07    0.16
  11   7  -4    2.18    0.25
  -9  -7   4    2.00    0.20
  -9   7   4    1.78    0.17
   9   7  -4    1.89    0.15
   9   7  -4    2.05    0.24
  -9   7   4    1.93    0.17
   7   7  -4    0.20    0.06
  -7   7   4    0.20    0.09
   7   7  -4    0.01    0.09
  -7   7   4    0.17    0.07
   5  -7  -4    1.31    0.15
   5   7  -4    0.96    0.18
  -5   7   4    1.36    0.15
  -3  -7   4    0.29    0.09
  -3   7   4    0.19    0.07
  -1  -7   4    0.93    0.13
   1  -7   4    2.28    0.20
  -1   7  -4    1.89    0.25
   1   7   4    1.86    0.17
  -3   7  -4    0.21    0.08
   3   7   4    0.25    0.07
  -5  -7  -4    0.11    0.08
  -5   7  -4    0.13    0.07
  -5   7  -4    0.10    0.09
   5   7   4    0.16    0.07
  -7  -7  -4    0.47    0.11
   7   7   4    0.63    0.10
  -7   7  -4    0.57    0.08
  -7   7  -4    0.63    0.12
  -9  -7  -4    1.09    0.15
  -9  -7  -4    1.08    0.12
  -9  -7  -4    1.34    0.14
   9   7   4    1.37    0.13
  -9   7  -4    1.22    0.14
 -11  -7  -4    0.34    0.08
 -11  -7  -4    0.18    0.09
 -11  -7  -4    0.15    0.07
  11   7   4    0.22    0.07
 -11   7  -4    0.24    0.07
 -13  -7  -4    0.48    0.10
 -13  -7  -4    0.80    0.10
 -13  -7  -4    0.57    0.09
 -13  -7  -4    0.68    0.10
 -13  -7  -4    0.48    0.12
  13   7   4    0.57    0.09
 -15  -7  -4    0.67    0.13
 -15  -7  -4    0.50    0.10
 -15  -7  -4    0.50    0.08
 -15  -7  -4    0.45    0.08
 -15  -7  -4    0.54    0.09
 -17  -7  -4    0.25    0.07
 -17  -7  -4    0.31    0.08
 -17  -7  -4    0.34    0.07
 -17  -7  -4    0.29    0.06
 -17  -7  -4    0.61    0.13
 -19  -7  -4    0.36    0.11
 -19  -7  -4    0.20    0.06
 -19  -7  -4    0.17    0.06
 -19  -7  -4    0.26    0.07
  19   7   4    0.18    0.06
 -21  -7  -4    0.08    0.08
 -21  -7  -4    0.10    0.05
 -21  -7  -4    0.08    0.06
 -21  -7  -4    0.06    0.05
  21   7   4    0.09    0.05
 -23  -7  -4    0.18    0.07
 -23  -7  -4    0.13    0.04
 -23  -7  -4    0.02    0.05
 -25  -7  -4    0.08    0.05
 -25  -7  -4    0.01    0.03
 -26  -8   4    0.03    0.04
  26   8  -4    0.03    0.03
 -26   8   4    0.11    0.04
 -24  -8   4    0.16    0.06
  24   8  -4    0.16    0.04
 -24   8   4    0.14    0.05
 -22  -8   4    0.11    0.04
 -22  -8   4    0.08    0.06
 -22   8   4    0.02    0.04
  22   8  -4    0.08    0.04
 -20  -8   4    0.03    0.04
 -20  -8   4    0.00    0.05
 -20  -8   4    0.00    0.07
 -20   8   4    0.02    0.05
 -18  -8   4    0.18    0.07
 -18  -8   4    0.17    0.08
 -18  -8   4    0.29    0.07
 -18   8   4    0.15    0.06
  18   8  -4    0.08    0.04
 -16  -8   4    0.13    0.06
 -16  -8   4    0.04    0.06
 -16  -8   4    0.07    0.08
 -16   8   4    0.03    0.05
  16   8  -4    0.14    0.05
 -14  -8   4    0.14    0.07
 -14  -8   4    0.18    0.08
 -14   8   4    0.14    0.04
 -14   8   4    0.10    0.06
  14   8  -4    0.14    0.05
 -12  -8   4    0.24    0.08
 -12  -8   4    0.20    0.09
 -12   8   4    0.34    0.07
  12   8  -4    0.29    0.07
 -12   8   4    0.33    0.08
 -10  -8   4   -0.02    0.07
 -10   8   4    0.06    0.06
  10   8  -4    0.02    0.08
  10   8  -4    0.01    0.05
 -10   8   4    0.15    0.07
  -8  -8   4    0.53    0.11
   8   8  -4    0.73    0.16
  -8   8   4    0.57    0.10
  -8   8   4    0.52    0.10
   8   8  -4    0.65    0.09
  -6  -8   4    0.87    0.13
   6   8  -4    1.08    0.12
  -6   8   4    0.85    0.12
   6   8  -4    0.81    0.17
  -6   8   4    0.87    0.13
  -4  -8   4    0.91    0.14
   4   8  -4    0.47    0.09
  -4   8   4    0.64    0.11
   4   8  -4    0.71    0.16
  -2  -8   4    0.19    0.08
   2   8  -4    0.11    0.06
  -2   8   4    0.07    0.07
   2   8  -4    0.19    0.10
   0  -8  -4    1.24    0.16
   0  -8   4    1.09    0.14
   0   8  -4    1.12    0.15
   0   8   4    0.98    0.13
  -2  -8  -4    0.47    0.11
   2  -8   4    0.42    0.10
   2   8   4    0.50    0.10
  -2   8  -4    0.46    0.09
   4  -8   4    0.30    0.09
  -4  -8  -4    0.51    0.11
  -4   8  -4    0.35    0.08
   4   8   4    0.48    0.09
  -4   8  -4    0.47    0.11
  -6  -8  -4    0.95    0.14
  -6   8  -4    0.93    0.09
  -6   8  -4    1.04    0.14
   6   8   4    1.22    0.13
  -8  -8  -4    0.21    0.09
  -8  -8  -4    0.24    0.08
   8   8   4    0.23    0.07
  -8   8  -4    0.25    0.08
 -10  -8  -4    0.92    0.15
 -10  -8  -4    0.99    0.12
 -10   8  -4    1.06    0.12
  10   8   4    1.37    0.13
 -12  -8  -4    0.83    0.14
 -12  -8  -4    0.95    0.10
 -12  -8  -4    0.64    0.10
  12   8   4    0.93    0.11
 -14  -8  -4    0.06    0.05
 -14  -8  -4    0.08    0.07
 -14  -8  -4    0.03    0.04
 -14  -8  -4    0.03    0.06
  14   8   4    0.09    0.05
 -16  -8  -4    0.07    0.04
 -16  -8  -4    0.14    0.05
 -16  -8  -4    0.05    0.07
 -16  -8  -4    0.00    0.06
  16   8   4    0.02    0.04
 -18  -8  -4    0.16    0.08
 -18  -8  -4    0.13    0.04
 -18  -8  -4    0.07    0.05
  18   8   4    0.20    0.05
 -20  -8  -4    0.18    0.04
 -20  -8  -4    0.09    0.07
 -20  -8  -4    0.14    0.05
  20   8   4    0.20    0.05
 -22  -8  -4    0.05    0.05
 -22  -8  -4   -0.02    0.04
 -21  -9   4   -0.02    0.05
 -21  -9   4    0.01    0.03
 -21  -9   4   -0.01    0.04
 -21   9   4   -0.01    0.03
  21   9  -4   -0.05    0.03
 -19  -9   4    0.01    0.05
 -19  -9   4    0.05    0.06
 -19  -9   4    0.01    0.04
 -19   9   4    0.03    0.04
  19   9  -4    0.06    0.04
 -17  -9   4    0.14    0.07
 -17  -9   4    0.06    0.05
 -17  -9   4    0.09    0.05
 -17   9   4    0.07    0.05
  17   9  -4    0.10    0.04
 -15  -9   4    0.07    0.06
 -15  -9   4    0.11    0.06
  15   9  -4    0.17    0.05
 -15   9   4    0.08    0.05
 -13  -9   4    0.17    0.08
 -13   9   4    0.23    0.06
  13   9  -4    0.16    0.06
 -11  -9   4    0.44    0.10
  11   9  -4    0.45    0.08
 -11   9   4    0.49    0.06
 -11   9   4    0.36    0.08
  -9  -9   4    0.47    0.10
   9   9  -4    0.53    0.08
  -9   9   4    0.79    0.11
  -9   9   4    0.58    0.08
  -7  -9   4    0.65    0.12
  -7   9   4    0.81    0.11
  -7   9   4    0.74    0.11
   7   9  -4    0.60    0.09
  -5  -9   4   -0.06    0.05
   5   9  -4    0.08    0.06
  -5   9   4    0.05    0.05
  -5   9   4    0.02    0.07
   5   9  -4    0.11    0.08
  -3  -9   4    0.04    0.06
  -3   9   4    0.01    0.07
  -3   9   4   -0.04    0.05
   3   9  -4    0.02    0.07
   3   9  -4    0.03    0.05
  -1  -9   4    0.01    0.06
   1   9  -4    0.05    0.07
  -1   9   4    0.04    0.06
   1   9  -4   -0.01    0.05
  -1  -9  -4    0.10    0.07
   1  -9   4    0.03    0.06
   1   9   4    0.09    0.06
  -1   9  -4   -0.01    0.06
   3  -9   4    0.14    0.08
  -3  -9  -4    0.10    0.08
  -3   9  -4    0.16    0.05
  -3   9  -4    0.10    0.07
   3   9   4    0.11    0.06
  -5  -9  -4    0.03    0.07
   5   9   4   -0.01    0.05
  -5   9  -4    0.05    0.04
  -5   9  -4    0.10    0.07
  -7  -9  -4    0.19    0.08
  -7  -9  -4    0.13    0.07
   7   9   4    0.19    0.07
  -7   9  -4    0.03    0.06
  -9  -9  -4    0.06    0.07
  -9  -9  -4    0.02    0.06
   9   9   4   -0.06    0.04
 -11  -9  -4    0.23    0.07
 -11  -9  -4    0.18    0.08
  11   9   4    0.13    0.06
 -13  -9  -4    0.10    0.07
 -13  -9  -4    0.02    0.05
  13   9   4    0.04    0.05
 -15  -9  -4    0.09    0.06
 -15  -9  -4    0.00    0.03
  15   9   4    0.01    0.04
 -17  -9  -4    0.05    0.05
  17   9   4    0.07    0.04
 -16 -10   4    0.03    0.04
 -16 -10   4   -0.02    0.04
 -16  10   4    0.06    0.03
  16  10  -4    0.06    0.03
 -14 -10   4    0.00    0.04
 -14 -10   4    0.04    0.05
 -14  10   4    0.01    0.03
  14  10  -4    0.01    0.03
 -12 -10   4   -0.03    0.05
 -12  10   4    0.06    0.04
  12  10  -4    0.05    0.04
 -10 -10   4    0.05    0.05
  10  10  -4    0.04    0.06
  10  10  -4    0.11    0.05
 -10  10   4    0.06    0.04
  -8 -10   4    0.00    0.05
  -8  10   4    0.11    0.04
  -8  10   4    0.00    0.04
   8  10  -4    0.03    0.06
   8  10  -4    0.08    0.04
  -6 -10   4    0.08    0.06
   6  10  -4    0.08    0.05
  -6  10   4    0.19    0.06
   6  10  -4    0.16    0.07
  -6  10   4    0.05    0.05
  -4 -10   4    0.17    0.07
   4  10  -4    0.11    0.05
   4  10  -4    0.07    0.06
  -4  10   4    0.11    0.05
  -4  10   4    0.06    0.05
  -2 -10   4    0.03    0.05
  -2  10   4    0.12    0.06
  -2  10   4    0.06    0.05
   2  10  -4    0.05    0.05
   0 -10   4    0.12    0.06
   0  10   4    0.09    0.05
   0  10   4    0.23    0.07
   0  10  -4    0.19    0.05
   0  10  -4    0.12    0.07
  -2 -10  -4    0.03    0.06
   2 -10   4    0.01    0.05
  -2  10  -4   -0.01    0.03
  -2  10  -4    0.00    0.06
   2  10   4   -0.01    0.05
  -4 -10  -4    0.02    0.06
   4  10   4    0.02    0.05
  -4  10  -4   -0.05    0.05
  -6 -10  -4    0.19    0.07
  -6 -10  -4    0.03    0.06
   6  10   4    0.14    0.05
  -8 -10  -4    0.04    0.05
  -8 -10  -4    0.04    0.06
   8  10   4   -0.02    0.04
 -10 -10  -4    0.24    0.06
 -10 -10  -4    0.28    0.07
  10  10   4    0.25    0.05
 -12 -10  -4   -0.03    0.04
 -12 -10  -4    0.10    0.04
  12  10   4    0.06    0.04
  -3  11   4    0.08    0.04
  -3  11   4    0.10    0.03
  -1  11   4    0.29    0.04
  -1  11   4    0.28    0.05
 -38   0   5    0.07    0.03
 -36   0   5   -0.02    0.02
 -36   0   5    0.02    0.04
 -34   0   5    0.03    0.06
 -34   0   5   -0.01    0.03
 -34   0   5    0.04    0.05
 -32   0   5    0.29    0.08
 -32   0   5    0.27    0.06
 -32   0   5    0.40    0.09
 -30   0   5    0.05    0.06
 -30   0   5    0.01    0.04
 -30   0   5    0.08    0.07
 -28   0   5    0.70    0.10
 -28   0   5    0.74    0.12
 -28   0   5    0.48    0.10
 -26   0   5    0.05    0.06
 -26   0   5    0.07    0.08
 -26   0   5    0.16    0.06
 -24   0   5    2.61    0.24
 -22   0   5    3.53    0.22
 -22   0   5    3.03    0.23
 -20   0   5    0.35    0.07
 -20   0   5    0.22    0.07
 -20   0   5    0.59    0.09
 -18   0   5   10.22    0.51
 -18   0   5   11.17    0.50
 -18   0   5   10.75    0.54
 -16   0   5    0.02    0.04
 -16   0   5    0.02    0.04
 -16   0   5    0.02    0.04
 -14   0   5    1.06    0.11
 -14   0   5    1.24    0.10
 -14   0   5    1.05    0.10
 -12   0   5    1.07    0.11
 -12   0   5    1.35    0.09
 -12   0   5    1.42    0.11
 -10   0   5    8.81    0.39
  10   0  -5    8.81    0.42
 -10   0   5    9.01    0.42
 -10   0   5    8.98    0.40
 -10   0   5    8.77    0.40
  -8   0   5   -0.01    0.02
  -8   0   5    0.01    0.02
   8   0  -5    0.09    0.03
  -8   0   5    0.01    0.03
  -8   0   5    0.06    0.03
  -6   0   5    0.18    0.03
  -6   0   5    0.32    0.04
   6   0  -5    0.32    0.04
  -6   0   5    0.34    0.04
  -6   0   5    0.29    0.04
  -4   0   5   -0.03    0.02
  -4   0   5   -0.01    0.02
  -4   0   5    0.00    0.02
  -4   0   5    0.03    0.02
   4   0  -5   -0.01    0.03
   0   0   5    9.01    0.39
   0   0   5    8.87    0.38
   2   0   5    0.27    0.04
   2   0   5    0.24    0.04
   4   0   5    1.77    0.10
   4   0   5    1.81    0.10
   4   0   5    1.81    0.10
   6   0   5    9.97    0.45
   8   0   5    0.53    0.06
  -8   0  -5    0.60    0.06
 -10   0  -5    2.52    0.20
  10   0   5    2.65    0.16
 -10   0  -5    2.82    0.16
 -12   0  -5    1.91    0.18
 -12   0  -5    1.75    0.13
 -14   0  -5    1.80    0.14
 -14   0  -5    1.91    0.18
  14   0   5    1.91    0.14
 -16   0  -5    8.82    0.44
  16   0   5    9.25    0.45
 -37  -1   5    0.08    0.03
 -37  -1   5    0.05    0.04
 -37   1   5    0.06    0.03
 -35  -1   5    0.08    0.06
 -35  -1   5    0.11    0.04
 -35  -1   5   -0.05    0.04
 -35   1   5    0.03    0.05
 -35   1   5    0.02    0.03
 -33  -1   5    0.10    0.06
 -33  -1   5    0.21    0.08
 -33  -1   5    0.09    0.04
 -33   1   5    0.01    0.04
 -33   1   5    0.15    0.07
 -31  -1   5    0.98    0.10
 -31  -1   5    0.82    0.13
 -31  -1   5    0.82    0.12
 -31   1   5    0.53    0.08
 -31   1   5    0.82    0.12
 -29  -1   5    0.57    0.11
 -29  -1   5    0.47    0.08
 -29  -1   5    0.46    0.09
 -29   1   5    0.29    0.09
 -29   1   5    0.31    0.07
 -27  -1   5    2.63    0.17
 -27  -1   5    2.98    0.24
 -27  -1   5    2.69    0.23
 -27   1   5    2.53    0.18
 -27   1   5    2.62    0.23
 -27   1   5    2.78    0.24
 -25  -1   5    1.90    0.20
 -25  -1   5    1.85    0.16
 -25  -1   5    1.77    0.17
 -25  -1   5    1.81    0.18
 -25   1   5    1.65    0.15
 -25   1   5    1.89    0.19
 -23  -1   5    1.64    0.18
 -23  -1   5    1.72    0.17
 -23   1   5    1.71    0.18
 -21  -1   5    3.92    0.25
 -21  -1   5    3.65    0.25
 -21  -1   5    4.15    0.25
 -19  -1   5    4.33    0.26
 -19  -1   5    3.98    0.25
 -19  -1   5    4.72    0.28
 -19   1   5    4.71    0.28
 -17  -1   5   19.98    0.90
 -17  -1   5   21.16    0.97
 -17  -1   5   21.45    0.94
 -17   1   5   19.14    0.97
 -17   1   5   22.53    0.93
 -15  -1   5   62.95    2.68
 -15  -1   5   64.80    2.78
 -15  -1   5   65.31    2.87
 -15   1   5   68.91    2.67
 -15   1   5   66.83    2.77
 -15   1   5   63.81    2.87
 -13  -1   5   16.08    0.74
 -13  -1   5   15.49    0.68
 -13  -1   5   15.96    0.71
 -13  -1   5   15.73    0.71
 -13   1   5   14.69    0.73
 -13   1   5   16.98    0.68
 -13   1   5   15.85    0.70
 -11  -1   5   46.17    1.92
 -11  -1   5   43.82    1.81
 -11  -1   5   44.47    1.87
 -11  -1   5   44.13    1.94
 -11   1   5   43.54    1.80
 -11   1   5   42.57    1.86
 -11   1   5   43.75    1.94
   9  -1  -5   82.14    3.54
  -9  -1   5   82.94    3.52
  -9  -1   5   77.72    3.51
   9   1  -5   82.92    3.55
  -9   1   5   80.37    3.28
  -9   1   5   85.22    3.52
  -9   1   5   76.96    3.39
   7  -1  -5   24.92    1.09
  -7  -1   5   24.57    1.08
  -7  -1   5   23.88    1.08
  -7  -1   5   24.33    1.05
  -7   1   5   24.16    1.04
  -7   1   5   24.47    1.08
  -7   1   5   25.06    1.01
   7   1  -5   25.16    1.10
  -5  -1   5    4.11    0.20
  -5  -1   5    3.98    0.20
   5  -1  -5    4.27    0.21
  -5  -1   5    4.14    0.20
  -5  -1   5    4.21    0.19
  -5   1   5    4.20    0.19
  -5   1   5    4.30    0.20
   5   1  -5    4.06    0.22
  -5   1   5    4.15    0.19
  -3  -1   5   19.63    0.84
  -3  -1   5   20.36    0.87
  -3  -1   5   20.46    0.81
   3  -1  -5   20.36    0.88
  -3  -1   5   19.28    0.87
   3  -1  -5   18.80    0.86
  -3   1   5   20.00    0.81
  -3   1   5   19.66    0.84
  -1  -1   5    5.02    0.23
   1  -1  -5    5.32    0.25
  -1  -1   5    4.96    0.22
  -1  -1   5    4.97    0.24
  -1  -1   5    5.32    0.25
  -1   1   5    5.11    0.24
  -1   1   5    5.25    0.23
   1  -1   5   32.10    1.26
   1  -1   5   29.42    1.34
   1  -1   5   30.33    1.30
   1   1   5   31.48    1.31
   1   1   5   31.71    1.27
   3  -1   5    0.90    0.06
   3  -1   5    0.91    0.06
   3  -1   5    0.90    0.06
   3  -1   5    1.03    0.08
  -5  -1  -5   25.83    1.07
   5  -1   5   24.95    1.11
   5  -1   5   25.42    1.02
   5  -1   5   25.32    1.06
   5  -1   5   23.30    1.09
   5   1   5   24.52    1.07
   7  -1   5   18.84    0.79
   7  -1   5   18.68    0.77
   7  -1   5   17.51    0.83
   7  -1   5   17.93    0.82
  -7  -1  -5   18.48    0.80
   9  -1   5    8.43    0.42
   9  -1   5    8.49    0.42
   9  -1   5    8.74    0.40
  -9  -1  -5    9.09    0.42
   9  -1   5    8.94    0.39
  11  -1   5   16.32    0.71
  11  -1   5   16.14    0.68
 -11  -1  -5   15.65    0.87
 -11  -1  -5   15.36    0.72
  11  -1   5   16.32    0.74
 -13  -1  -5    1.19    0.12
 -13  -1  -5    1.05    0.14
  13  -1   5    1.37    0.12
  15  -1   5   12.46    0.61
 -15  -1  -5   12.90    0.72
 -15  -1  -5   12.63    0.60
 -17  -1  -5    4.17    0.25
 -17  -1  -5    3.85    0.30
 -19  -1  -5    0.31    0.08
 -19  -1  -5    0.37    0.11
 -19  -1  -5    0.21    0.08
  19   1   5    0.27    0.08
 -21  -1  -5    2.78    0.27
 -36  -2   5    0.13    0.03
 -36  -2   5    0.08    0.04
 -36  -2   5    0.03    0.05
 -36   2   5    0.06    0.03
 -34  -2   5    0.23    0.05
 -34  -2   5    0.32    0.07
 -34  -2   5    0.37    0.08
 -34   2   5    0.42    0.06
 -32  -2   5    0.21    0.05
 -32  -2   5    0.20    0.07
 -32  -2   5    0.20    0.07
 -32   2   5    0.26    0.06
 -30  -2   5    0.28    0.09
 -30  -2   5    0.26    0.06
 -30  -2   5    0.27    0.08
 -30   2   5    0.11    0.06
 -28  -2   5    0.08    0.06
 -28  -2   5    0.04    0.04
 -28  -2   5   -0.02    0.05
 -28   2   5    0.11    0.08
 -28   2   5    0.04    0.05
 -26  -2   5    0.78    0.13
 -26  -2   5    0.81    0.10
 -26  -2   5    0.92    0.13
 -26   2   5    0.79    0.11
 -26   2   5    1.02    0.14
 -24  -2   5    0.35    0.09
 -24  -2   5    0.23    0.08
 -22  -2   5    1.45    0.16
 -22  -2   5    1.47    0.17
 -22   2   5    1.46    0.16
 -20  -2   5    2.60    0.19
 -20  -2   5    2.64    0.22
 -20  -2   5    2.67    0.20
 -20   2   5    2.63    0.20
 -18  -2   5    0.29    0.07
 -18  -2   5    0.37    0.08
 -18  -2   5    0.33    0.07
 -18   2   5    0.18    0.06
 -16  -2   5    3.95    0.23
 -16  -2   5    4.24    0.23
 -16  -2   5    3.96    0.24
 -16   2   5    3.77    0.24
 -14  -2   5    8.50    0.41
 -14  -2   5    8.33    0.41
 -14  -2   5    7.97    0.39
 -14  -2   5    8.39    0.42
 -14   2   5    8.63    0.42
 -12  -2   5   10.85    0.53
 -12  -2   5   11.53    0.51
 -12  -2   5   11.85    0.54
 -12  -2   5   11.32    0.55
 -12   2   5   11.07    0.55
 -12   2   5   12.31    0.51
 -10  -2   5    3.05    0.17
 -10  -2   5    2.98    0.18
 -10  -2   5    2.93    0.17
 -10  -2   5    2.83    0.17
 -10   2   5    3.06    0.15
 -10   2   5    3.00    0.17
 -10   2   5    2.96    0.16
  -8  -2   5    0.45    0.05
  -8  -2   5    0.34    0.05
  -8  -2   5    0.42    0.05
  -8  -2   5    0.47    0.06
  -8   2   5    0.40    0.04
  -8   2   5    0.44    0.06
  -8   2   5    0.38    0.04
  -6  -2   5   12.21    0.53
  -6  -2   5   12.45    0.57
  -6  -2   5   12.51    0.55
  -6  -2   5   12.14    0.56
   6  -2  -5   11.55    0.56
   6  -2  -5   12.66    0.57
  -6   2   5   12.90    0.52
  -6   2   5   12.26    0.53
  -4  -2   5    7.40    0.32
  -4  -2   5    7.32    0.35
   4  -2  -5    7.45    0.34
  -4  -2   5    7.20    0.33
   4  -2  -5    7.67    0.35
  -4  -2   5    7.22    0.34
  -4   2   5    7.18    0.33
  -4   2   5    7.58    0.32
   2  -2  -5    6.80    0.32
  -2  -2   5    6.64    0.31
  -2  -2   5    6.45    0.30
   2  -2  -5    6.80    0.30
  -2  -2   5    6.50    0.29
  -2   2   5    6.59    0.30
  -2   2   5    6.25    0.29
   0  -2   5   14.39    0.57
   0  -2   5   13.69    0.59
   0  -2  -5   13.22    0.61
   0  -2   5   13.82    0.62
   0  -2  -5   13.33    0.62
   0   2   5   14.42    0.60
   0   2   5   13.85    0.58
   2  -2   5    7.90    0.33
   2  -2   5    8.26    0.37
   2  -2   5    7.87    0.34
   2  -2   5    7.60    0.37
  -2  -2  -5    7.67    0.35
   2   2   5    7.66    0.36
   4  -2   5    0.23    0.03
   4  -2   5    0.25    0.03
   4  -2   5    0.34    0.05
  -4  -2  -5    0.35    0.05
   4  -2   5    0.18    0.04
   4   2   5    0.18    0.04
  -6  -2  -5    7.47    0.35
   6  -2   5    7.10    0.35
   6  -2   5    7.13    0.31
   6  -2   5    7.07    0.35
   8  -2   5    0.14    0.05
  -8  -2  -5    0.11    0.04
   8  -2   5    0.13    0.04
 -10  -2  -5    0.31    0.06
  10  -2   5    0.27    0.05
  10  -2   5    0.28    0.06
 -12  -2  -5    0.86    0.10
  12  -2   5    1.14    0.10
 -12  -2  -5    1.08    0.15
 -14  -2  -5    0.64    0.09
 -14  -2  -5    0.89    0.14
 -16  -2  -5    0.82    0.11
 -16  -2  -5    0.84    0.14
 -18  -2  -5    1.21    0.13
 -18  -2  -5    1.90    0.21
 -18  -2  -5    1.37    0.15
 -20  -2  -5    0.17    0.07
 -20  -2  -5    0.19    0.07
 -20  -2  -5    0.14    0.08
 -20  -2  -5    0.17    0.10
 -22  -2  -5    0.12    0.08
 -22  -2  -5    0.13    0.06
 -22  -2  -5    0.08    0.06
 -22  -2  -5    0.16    0.11
 -24  -2  -5    0.15    0.08
 -24  -2  -5    0.32    0.08
 -24  -2  -5    0.15    0.06
 -26  -2  -5    0.03    0.05
 -26  -2  -5    0.01    0.04
 -28  -2  -5    0.30    0.06
 -37  -3   5    0.02    0.03
 -35  -3   5    0.01    0.03
 -35  -3   5    0.10    0.05
 -35  -3   5   -0.02    0.03
 -35   3   5   -0.02    0.03
 -33  -3   5    0.17    0.06
 -33  -3   5    0.06    0.05
 -33  -3   5    0.05    0.04
 -33   3   5    0.06    0.04
 -31  -3   5    0.07    0.05
 -31  -3   5    0.03    0.04
 -31  -3   5    0.03    0.06
 -31   3   5    0.04    0.05
 -29  -3   5    0.25    0.06
 -29  -3   5    0.33    0.09
 -29  -3   5    0.30    0.08
 -29   3   5    0.30    0.08
 -27  -3   5    0.18    0.07
 -27  -3   5    0.10    0.05
 -27  -3   5    0.11    0.06
 -27   3   5    0.12    0.06
 -25  -3   5    0.25    0.07
 -25  -3   5    0.44    0.10
 -25  -3   5    0.41    0.06
 -25  -3   5    0.39    0.09
 -25   3   5    0.27    0.08
 -23  -3   5    0.68    0.11
 -23  -3   5    0.79    0.08
 -23  -3   5    0.89    0.10
 -23  -3   5    0.73    0.11
 -23   3   5    0.67    0.11
  21  -3  -5    0.04    0.07
 -21  -3   5    0.08    0.07
 -21  -3   5    0.01    0.06
 -19  -3   5    0.54    0.09
 -19  -3   5    0.42    0.09
 -19  -3   5    0.54    0.10
 -17  -3   5    3.95    0.25
 -17  -3   5    3.68    0.24
 -17  -3   5    3.82    0.25
 -17  -3   5    3.77    0.23
  15  -3  -5    0.47    0.09
 -15  -3   5    0.60    0.09
 -15  -3   5    0.71    0.09
 -15  -3   5    0.62    0.10
 -15  -3   5    0.51    0.08
 -13  -3   5    0.52    0.08
 -13  -3   5    0.57    0.09
 -13  -3   5    0.64    0.09
  13  -3  -5    0.59    0.09
 -13  -3   5    0.56    0.08
 -11  -3   5    2.39    0.16
 -11  -3   5    2.34    0.15
 -11  -3   5    2.25    0.15
 -11  -3   5    2.42    0.16
  11  -3  -5    2.26    0.16
  -9  -3   5    6.04    0.32
  -9  -3   5    6.44    0.31
   9  -3  -5    6.50    0.33
  -9  -3   5    6.28    0.32
  -9  -3   5    6.11    0.30
   7  -3  -5   23.57    1.06
  -7  -3   5   23.44    1.05
  -7  -3   5   23.10    0.98
  -7  -3   5   23.83    1.06
  -7  -3   5   23.43    1.02
  -5  -3   5    7.28    0.36
  -5  -3   5    7.30    0.35
  -5  -3   5    7.55    0.34
  -5  -3   5    7.16    0.33
   5  -3  -5    7.12    0.35
  -5   3   5    7.50    0.33
  -5   3   5    7.28    0.31
   3  -3  -5   37.69    1.57
   3  -3  -5   36.32    1.59
  -3  -3   5   36.48    1.58
  -3  -3   5   35.33    1.47
  -3  -3   5   35.07    1.52
  -3  -3   5   36.53    1.58
  -3   3   5   35.56    1.46
  -3   3   5   33.83    1.51
  -1  -3   5    9.21    0.42
  -1  -3   5    9.02    0.42
  -1  -3   5    8.46    0.38
   1  -3  -5    8.59    0.41
   1  -3  -5    8.60    0.41
  -1  -3   5    8.54    0.39
  -1   3   5    8.59    0.38
  -1   3   5    9.36    0.40
   1  -3   5    1.63    0.11
  -1  -3  -5    1.64    0.10
  -1  -3  -5    1.42    0.10
   1  -3   5    1.86    0.11
   1  -3   5    1.45    0.09
   1   3   5    1.60    0.10
  -3  -3  -5   10.84    0.50
  -3  -3  -5   11.22    0.51
   3  -3   5   11.04    0.52
   3  -3   5   11.59    0.52
   3   3   5   10.91    0.50
  -5  -3  -5    2.83    0.17
   5  -3   5    3.19    0.17
   5  -3   5    3.03    0.18
   7  -3   5    1.98    0.14
  -7  -3  -5    2.07    0.14
   7  -3   5    1.80    0.12
   9  -3   5    0.12    0.05
   9  -3   5    0.15    0.04
  -9  -3  -5    0.09    0.05
  11  -3   5    2.99    0.18
 -11  -3  -5    2.74    0.24
 -11  -3  -5    3.21    0.20
  11  -3   5    3.24    0.20
 -13  -3  -5    1.59    0.19
 -13  -3  -5    1.33    0.14
 -15  -3  -5    3.11    0.26
 -15  -3  -5    2.32    0.21
 -17  -3  -5    1.89    0.18
 -17  -3  -5    1.95    0.18
 -17  -3  -5    2.58    0.26
 -19  -3  -5    0.51    0.09
 -19  -3  -5    0.51    0.13
 -19  -3  -5    0.69    0.13
 -19  -3  -5    0.60    0.11
 -19  -3  -5    0.64    0.10
 -21  -3  -5    0.46    0.13
 -21  -3  -5    0.48    0.09
 -21  -3  -5    0.49    0.09
 -21  -3  -5    0.40    0.10
 -23  -3  -5    0.30    0.08
 -23  -3  -5    0.32    0.09
 -23  -3  -5    0.43    0.08
 -23  -3  -5    0.21    0.11
 -25  -3  -5    0.46    0.10
 -25  -3  -5    0.34    0.07
 -25  -3  -5    0.44    0.08
 -27  -3  -5   -0.02    0.06
 -27  -3  -5    0.01    0.05
 -27  -3  -5    0.02    0.04
 -29  -3  -5   -0.01    0.04
 -29  -3  -5    0.04    0.04
 -36  -4   5    0.07    0.02
 -34  -4   5    0.04    0.04
 -34  -4   5    0.03    0.03
 -34  -4   5    0.01    0.04
 -34   4   5    0.09    0.04
 -32  -4   5    0.26    0.06
 -32  -4   5    0.38    0.08
 -32  -4   5    0.32    0.05
 -32   4   5    0.18    0.05
 -30  -4   5    0.11    0.06
 -30  -4   5    0.02    0.05
 -30  -4   5    0.05    0.04
 -30   4   5    0.10    0.05
 -28  -4   5    0.08    0.08
 -28  -4   5   -0.02    0.04
 -28  -4   5   -0.08    0.04
 -28  -4   5    0.00    0.06
 -28   4   5   -0.01    0.05
 -26  -4   5    0.87    0.08
 -26  -4   5    0.76    0.11
 -26  -4   5    0.85    0.14
 -26  -4   5    0.97    0.10
 -26  -4   5    0.90    0.13
 -26   4   5    0.97    0.12
 -24  -4   5    1.41    0.11
 -24  -4   5    1.54    0.16
 -24  -4   5    1.32    0.16
 -24  -4   5    1.19    0.15
 -24  -4   5    1.30    0.12
 -24   4   5    0.97    0.13
 -22  -4   5    0.39    0.07
 -22  -4   5    0.38    0.09
 -22  -4   5    0.39    0.07
 -22  -4   5    0.54    0.10
 -22   4   5    0.34    0.08
 -20  -4   5    0.13    0.07
  20  -4  -5    0.25    0.09
 -20  -4   5    0.29    0.09
 -20  -4   5    0.28    0.08
 -18  -4   5    2.35    0.20
 -18  -4   5    2.28    0.22
 -18  -4   5    2.31    0.22
 -18  -4   5    2.56    0.21
  18  -4  -5    2.20    0.21
 -16  -4   5    5.85    0.35
 -16  -4   5    5.55    0.32
 -16  -4   5    6.06    0.34
  16  -4  -5    6.37    0.36
 -16  -4   5    6.22    0.36
  14  -4  -5    1.27    0.15
 -14  -4   5    1.05    0.12
 -14  -4   5    1.21    0.13
 -14  -4   5    1.29    0.14
 -14  -4   5    1.16    0.14
 -12  -4   5    1.15    0.12
 -12  -4   5    1.02    0.11
 -12  -4   5    1.09    0.12
 -12  -4   5    1.19    0.13
  12  -4  -5    1.42    0.14
 -10  -4   5    0.21    0.06
  10  -4  -5    0.37    0.07
 -10  -4   5    0.23    0.06
 -10  -4   5    0.31    0.06
 -10  -4   5    0.23    0.06
  -8  -4   5    1.72    0.13
  -8  -4   5    2.00    0.14
   8  -4  -5    2.00    0.14
  -8  -4   5    1.98    0.13
  -8  -4   5    1.90    0.14
   6  -4  -5    1.55    0.13
  -6  -4   5    1.33    0.11
  -6  -4   5    1.25    0.12
  -6  -4   5    1.28    0.11
  -6  -4   5    1.34    0.12
  -4  -4   5    7.75    0.39
  -4  -4   5    8.17    0.40
  -4  -4   5    7.56    0.36
   4  -4  -5    8.50    0.39
   2  -4  -5    2.73    0.16
  -2  -4   5    2.51    0.16
   2  -4  -5    2.50    0.16
  -2  -4   5    2.63    0.16
   0  -4   5    5.01    0.27
   0  -4   5    4.91    0.27
   0  -4  -5    5.16    0.27
   0  -4  -5    5.15    0.27
   0   4   5    5.56    0.26
   0   4   5    5.10    0.24
  -2  -4  -5   19.04    0.87
   2  -4   5   19.60    0.89
   2  -4   5   19.28    0.88
   2   4   5   19.37    0.85
  -4  -4  -5    3.58    0.21
   4  -4   5    3.97    0.21
   4  -4   5    3.87    0.22
   4   4   5    3.74    0.21
  -6  -4  -5    3.62    0.21
   6  -4   5    3.59    0.22
   6  -4   5    3.54    0.20
   8  -4   5    2.94    0.18
   8  -4   5    2.70    0.19
  -8  -4  -5    2.95    0.19
  10  -4   5    1.68    0.15
 -10  -4  -5    1.63    0.20
 -10  -4  -5    1.90    0.17
 -12  -4  -5    4.52    0.33
 -12  -4  -5    3.93    0.25
  12  -4   5    3.82    0.26
 -14  -4  -5    0.77    0.12
 -14  -4  -5    0.69    0.10
 -14  -4  -5    1.01    0.16
 -16  -4  -5    2.41    0.25
 -16  -4  -5    1.70    0.11
 -16  -4  -5    2.06    0.17
 -16  -4  -5    2.17    0.18
 -18  -4  -5    2.65    0.23
 -18  -4  -5    3.10    0.21
 -18  -4  -5    3.83    0.30
 -18  -4  -5    3.27    0.29
 -18  -4  -5    3.36    0.22
 -20  -4  -5    0.23    0.11
 -20  -4  -5    0.27    0.11
 -20  -4  -5    0.18    0.08
 -20  -4  -5    0.12    0.06
 -20  -4  -5    0.08    0.05
 -22  -4  -5    0.02    0.05
 -22  -4  -5    0.01    0.10
 -22  -4  -5    0.02    0.05
 -22  -4  -5    0.05    0.07
 -22  -4  -5    0.04    0.09
 -24  -4  -5    0.92    0.11
 -24  -4  -5    1.06    0.13
 -24  -4  -5    0.80    0.11
 -26  -4  -5    0.06    0.04
 -26  -4  -5    0.04    0.05
 -26  -4  -5    0.01    0.03
 -28  -4  -5    0.04    0.04
 -28  -4  -5    0.01    0.05
 -28  -4  -5    0.03    0.04
 -30  -4  -5    0.04    0.03
 -33  -5   5    0.17    0.04
 -33  -5   5    0.12    0.03
 -33  -5   5    0.16    0.05
 -33   5   5    0.18    0.04
 -31  -5   5    0.16    0.07
 -31  -5   5    0.22    0.06
 -31  -5   5    0.23    0.06
 -31  -5   5    0.28    0.05
 -31   5   5    0.15    0.05
 -29  -5   5    0.27    0.07
 -29  -5   5    0.35    0.06
 -29  -5   5    0.43    0.10
 -29  -5   5    0.33    0.07
 -29   5   5    0.36    0.07
 -27  -5   5    0.02    0.05
 -27  -5   5    0.02    0.04
 -27  -5   5    0.06    0.06
 -27  -5   5    0.02    0.07
 -27   5   5    0.03    0.05
 -25  -5   5    1.42    0.14
 -25  -5   5    1.32    0.11
 -25  -5   5    1.36    0.12
 -25  -5   5    1.14    0.15
 -25  -5   5    1.70    0.17
 -25   5   5    1.40    0.15
 -23  -5   5    0.79    0.09
 -23  -5   5    0.59    0.12
 -23  -5   5    0.76    0.11
 -23  -5   5    0.75    0.09
 -23  -5   5    0.75    0.11
  23   5  -5    0.49    0.12
 -23   5   5    0.68    0.11
 -21  -5   5    1.06    0.13
 -21  -5   5    0.52    0.09
 -21  -5   5    0.71    0.13
 -21  -5   5    0.60    0.10
 -21  -5   5    0.74    0.09
 -21   5   5    0.89    0.12
  21   5  -5    0.77    0.14
 -19  -5   5   -0.06    0.04
 -19  -5   5    0.05    0.05
  19   5  -5    0.08    0.07
 -19   5   5    0.03    0.06
 -17  -5   5    0.40    0.09
 -17  -5   5    0.43    0.11
  17  -5  -5    0.62    0.12
 -17  -5   5    0.40    0.10
  15  -5  -5    1.49    0.17
 -15  -5   5    1.40    0.17
 -15  -5   5    1.34    0.15
 -15  -5   5    1.34    0.16
 -13  -5   5    0.68    0.11
 -13  -5   5    0.85    0.11
 -13  -5   5    0.67    0.10
 -13  -5   5    0.78    0.12
  13  -5  -5    1.01    0.13
  11  -5  -5    0.56    0.10
 -11  -5   5    0.69    0.10
 -11  -5   5    0.57    0.09
 -11  -5   5    0.53    0.09
 -11  -5   5    0.74    0.11
  -9  -5   5    1.39    0.14
  -9  -5   5    1.33    0.14
   9  -5  -5    1.14    0.12
   7  -5  -5    3.99    0.24
  -7  -5   5    3.81    0.24
  -7  -5   5    4.27    0.25
   5  -5  -5    2.86    0.18
  -5  -5   5    2.73    0.18
  -5  -5   5    2.45    0.18
  -3  -5   5    4.87    0.28
  -3  -5   5    4.83    0.28
   3  -5  -5    4.98    0.27
   1  -5  -5    0.56    0.08
  -1  -5   5    0.72    0.09
  -1  -5   5    0.71    0.09
   1  -5   5    1.86    0.14
   1  -5   5    1.84    0.16
  -1  -5  -5    1.70    0.12
   3  -5   5    5.14    0.29
  -3  -5  -5    5.58    0.28
   3  -5   5    5.65    0.31
   5  -5   5    1.20    0.12
   5  -5   5    1.37    0.14
   5   5   5    1.45    0.13
   7  -5   5    2.02    0.18
  -7  -5  -5    1.74    0.16
   7  -5   5    1.84    0.14
   7   5   5    1.75    0.15
  -9  -5  -5    1.11    0.17
  -9  -5  -5    1.07    0.13
   9  -5   5    1.21    0.14
   9   5   5    1.19    0.13
  11  -5   5    0.12    0.07
 -11  -5  -5    0.10    0.07
 -11  -5  -5    0.05    0.06
 -11  -5  -5    0.06    0.08
  11   5   5    0.11    0.06
 -13  -5  -5    0.53    0.09
  13  -5   5    0.65    0.12
 -13  -5  -5    0.65    0.14
 -13  -5  -5    0.49    0.09
 -13  -5  -5    0.47    0.08
 -15  -5  -5    0.44    0.07
 -15  -5  -5    0.30    0.09
 -15  -5  -5    0.29    0.11
 -15  -5  -5    0.20    0.09
 -15  -5  -5    0.43    0.09
 -15  -5  -5    0.23    0.07
 -17  -5  -5    0.17    0.10
 -17  -5  -5    0.11    0.07
 -17  -5  -5    0.05    0.08
 -17  -5  -5    0.15    0.06
 -17  -5  -5    0.10    0.06
 -19  -5  -5    1.12    0.13
 -19  -5  -5    1.24    0.18
 -19  -5  -5    1.31    0.14
 -19  -5  -5    1.09    0.14
 -19  -5  -5    1.08    0.18
 -21  -5  -5    0.06    0.05
 -21  -5  -5   -0.05    0.04
 -21  -5  -5   -0.07    0.06
 -21  -5  -5    0.10    0.09
 -23  -5  -5    0.29    0.07
 -23  -5  -5    0.17    0.09
 -23  -5  -5    0.16    0.07
 -23  -5  -5    0.33    0.07
 -25  -5  -5    0.01    0.04
 -25  -5  -5    0.00    0.04
 -25  -5  -5   -0.02    0.05
 -27  -5  -5    0.37    0.06
 -27  -5  -5    0.28    0.05
 -29  -5  -5    0.02    0.03
 -32  -6   5    0.08    0.03
 -32  -6   5    0.05    0.04
 -32   6   5    0.11    0.04
 -30  -6   5    0.39    0.06
 -30  -6   5    0.28    0.05
 -30  -6   5    0.33    0.05
 -30  -6   5    0.31    0.07
 -30   6   5    0.38    0.06
 -28  -6   5    0.14    0.07
 -28  -6   5    0.10    0.05
 -28  -6   5    0.06    0.04
 -28  -6   5    0.21    0.06
 -28   6   5    0.08    0.05
 -26  -6   5    0.58    0.08
 -26  -6   5    0.96    0.13
 -26  -6   5    0.88    0.11
 -26  -6   5    0.76    0.07
 -26  -6   5    0.85    0.10
 -26   6   5    0.68    0.10
 -24  -6   5    1.13    0.10
 -24  -6   5    1.07    0.12
 -24  -6   5    0.86    0.10
 -24  -6   5    0.97    0.13
 -24   6   5    0.94    0.12
 -22  -6   5    2.77    0.18
 -22  -6   5    2.84    0.17
 -22  -6   5    2.58    0.23
 -22   6   5    2.94    0.23
 -20  -6   5    0.28    0.06
 -20  -6   5    0.12    0.08
 -20  -6   5    0.35    0.08
  20   6  -5    0.24    0.10
 -18  -6   5    1.47    0.16
 -18  -6   5    1.24    0.13
 -18  -6   5    1.33    0.12
 -18   6   5    1.77    0.17
  18   6  -5    2.46    0.25
 -16  -6   5    0.72    0.12
 -16  -6   5    1.03    0.12
 -16  -6   5    1.02    0.15
 -16  -6   5    0.88    0.10
 -16   6   5    0.95    0.13
  16   6  -5    0.79    0.15
 -16   6   5    0.88    0.09
 -14  -6   5    1.69    0.13
 -14   6   5    1.44    0.13
 -14   6   5    1.49    0.16
  12  -6  -5   -0.02    0.06
 -12  -6   5    0.03    0.06
 -12  -6   5    0.03    0.06
 -10  -6   5    0.57    0.11
  10  -6  -5    0.63    0.11
 -10  -6   5    0.61    0.11
   8  -6  -5    1.17    0.13
  -8  -6   5    1.32    0.15
  -8  -6   5    1.29    0.15
  -6  -6   5    4.49    0.29
  -6  -6   5    4.97    0.30
   6  -6  -5    4.73    0.28
  -4  -6   5    4.20    0.27
  -4  -6   5    4.49    0.27
  -2  -6   5    0.61    0.10
   2  -6  -5    0.66    0.09
  -2  -6   5    0.67    0.11
   0  -6  -5    2.42    0.17
   0  -6   5    3.08    0.20
   0  -6   5    2.85    0.20
   2  -6   5    3.98    0.25
   2  -6   5    3.25    0.23
  -2  -6  -5    3.85    0.21
   4  -6   5    1.36    0.14
   4  -6   5    1.36    0.15
  -6  -6  -5    0.03    0.09
   6  -6   5    0.03    0.06
   8  -6   5    0.78    0.12
  -8  -6  -5    1.00    0.16
  -8  -6  -5    0.75    0.10
 -10  -6  -5    0.37    0.09
 -10  -6  -5    0.39    0.08
 -10  -6  -5    0.45    0.09
 -10  -6  -5    0.36    0.07
 -10  -6  -5    0.23    0.09
 -10  -6  -5    0.42    0.12
 -10   6  -5    0.44    0.09
 -12  -6  -5    1.16    0.12
 -12  -6  -5    0.91    0.10
 -12  -6  -5    1.01    0.12
 -12  -6  -5    1.00    0.14
 -12  -6  -5    1.06    0.12
 -12  -6  -5    0.82    0.14
 -12   6  -5    1.20    0.11
 -14  -6  -5    0.54    0.09
 -14  -6  -5    0.49    0.07
 -14  -6  -5    0.53    0.13
 -14  -6  -5    0.42    0.08
 -14  -6  -5    0.36    0.11
 -14  -6  -5    0.29    0.09
 -14  -6  -5    0.41    0.08
 -16  -6  -5    0.62    0.08
 -16  -6  -5    0.57    0.09
 -16  -6  -5    0.80    0.15
 -16  -6  -5    0.90    0.09
 -16  -6  -5    0.82    0.12
 -16  -6  -5    0.75    0.14
 -16  -6  -5    0.75    0.10
 -18  -6  -5    2.01    0.23
 -18  -6  -5    2.18    0.18
 -18  -6  -5    1.78    0.18
 -18  -6  -5    1.92    0.17
 -20  -6  -5    0.75    0.11
 -20  -6  -5    0.70    0.09
 -20  -6  -5    0.64    0.13
 -20  -6  -5    0.69    0.09
 -22  -6  -5    0.07    0.05
 -22  -6  -5    0.17    0.07
 -22  -6  -5    0.11    0.05
 -22  -6  -5    0.09    0.08
 -24  -6  -5    0.22    0.05
 -24  -6  -5    0.47    0.10
 -24  -6  -5    0.02    0.03
 -24  -6  -5    0.21    0.05
 -26  -6  -5   -0.01    0.03
 -26  -6  -5   -0.07    0.04
 -29  -7   5    0.14    0.05
 -29  -7   5    0.04    0.03
 -29   7   5    0.05    0.03
 -27  -7   5    0.23    0.05
 -27  -7   5    0.14    0.06
 -27   7   5    0.10    0.05
 -25  -7   5    0.15    0.07
 -25  -7   5    0.13    0.04
 -25  -7   5    0.10    0.04
 -25   7   5    0.25    0.07
 -23  -7   5    0.41    0.07
 -23  -7   5    0.32    0.09
 -23  -7   5    0.39    0.07
 -23   7   5    0.31    0.08
 -21  -7   5    0.53    0.08
 -21  -7   5    0.59    0.09
 -21  -7   5    0.45    0.10
 -21   7   5    0.47    0.09
 -19  -7   5    0.27    0.08
 -19  -7   5    0.21    0.08
 -19  -7   5    0.22    0.06
 -19  -7   5    0.49    0.11
 -19   7   5    0.36    0.08
 -17  -7   5    0.16    0.09
 -17  -7   5    0.22    0.06
 -17  -7   5    0.27    0.09
 -17  -7   5    0.32    0.08
  17   7  -5    0.45    0.12
 -17   7   5    0.30    0.08
 -15  -7   5    0.22    0.08
 -15  -7   5    0.17    0.09
 -15  -7   5    0.11    0.05
  15   7  -5    0.18    0.10
 -15   7   5    0.23    0.06
 -15   7   5    0.20    0.08
 -13  -7   5    0.26    0.10
 -13  -7   5    0.40    0.07
 -13  -7   5    0.29    0.09
 -13   7   5    0.55    0.08
  13   7  -5    0.38    0.13
 -13   7   5    0.40    0.09
 -11  -7   5    1.27    0.16
 -11  -7   5    1.00    0.10
 -11  -7   5    1.02    0.13
 -11   7   5    1.12    0.13
  11   7  -5    0.88    0.17
 -11   7   5    0.96    0.13
  -9  -7   5    0.07    0.07
  -9   7   5    0.14    0.08
   9   7  -5    0.16    0.06
   9   7  -5    0.26    0.11
  -9   7   5    0.10    0.07
  -7  -7   5    0.66    0.12
  -7   7   5    0.51    0.11
  -7   7   5    0.74    0.11
   7   7  -5    0.68    0.15
   7   7  -5    0.60    0.09
  -5   7   5    1.59    0.15
   5   7  -5    0.91    0.17
  -3   7   5    0.45    0.09
   3   7  -5    0.41    0.13
   1   7  -5    1.71    0.24
  -1   7   5    2.31    0.18
   1   7  -5    1.86    0.19
  -1   7  -5    0.69    0.16
  -1   7  -5    1.09    0.14
   1   7   5    1.21    0.13
  -3  -7  -5    0.20    0.09
   3  -7   5    0.06    0.07
  -3   7  -5    0.21    0.11
  -3   7  -5    0.08    0.07
   3   7   5    0.12    0.07
   5  -7   5    0.85    0.13
  -5  -7  -5    0.50    0.11
  -5   7  -5    0.64    0.09
   5   7   5    0.64    0.10
  -5   7  -5    0.71    0.12
  -7  -7  -5    0.10    0.08
  -7  -7  -5    0.14    0.08
  -7  -7  -5    0.07    0.05
  -7   7  -5    0.12    0.05
   7   7   5    0.02    0.05
  -7   7  -5    0.12    0.07
  -9  -7  -5    0.08    0.07
  -9  -7  -5    0.11    0.06
  -9  -7  -5    0.04    0.07
  -9   7  -5    0.08    0.07
   9   7   5    0.05    0.06
 -11  -7  -5    1.57    0.16
 -11  -7  -5    1.80    0.21
 -11  -7  -5    1.64    0.15
 -11  -7  -5    1.63    0.15
 -11   7  -5    1.59    0.14
  11   7   5    1.81    0.16
 -13  -7  -5    0.15    0.07
 -13  -7  -5    0.25    0.08
 -13  -7  -5    0.07    0.05
 -13  -7  -5    0.08    0.08
 -13  -7  -5    0.10    0.06
  13   7   5    0.17    0.06
 -15  -7  -5    0.18    0.08
 -15  -7  -5    0.24    0.07
 -15  -7  -5    0.18    0.06
 -15  -7  -5    0.38    0.11
 -15  -7  -5    0.16    0.06
  15   7   5    0.27    0.07
 -17  -7  -5    0.45    0.08
 -17  -7  -5    0.47    0.08
 -17  -7  -5    0.65    0.13
 -17  -7  -5    0.48    0.09
  17   7   5    0.73    0.09
 -19  -7  -5    0.28    0.07
 -19  -7  -5    0.16    0.08
 -19  -7  -5    0.28    0.06
  19   7   5    0.15    0.06
 -21  -7  -5   -0.01    0.04
 -21  -7  -5    0.05    0.05
 -21  -7  -5    0.08    0.07
 -23  -7  -5    0.21    0.04
 -23  -7  -5    0.08    0.07
 -23  -7  -5    0.07    0.05
 -25  -7  -5    0.06    0.04
 -26  -8   5    0.09    0.04
  26   8  -5    0.18    0.04
 -26   8   5    0.09    0.04
 -24  -8   5    0.03    0.03
 -24  -8   5    0.01    0.05
 -24   8   5    0.06    0.04
  24   8  -5    0.05    0.03
 -22  -8   5    1.34    0.13
 -22  -8   5    1.38    0.11
 -22   8   5    1.02    0.11
  22   8  -5    1.41    0.11
 -20  -8   5    0.00    0.05
 -20  -8   5   -0.05    0.06
 -20  -8   5    0.09    0.06
  20   8  -5    0.05    0.04
 -20   8   5    0.01    0.04
 -18  -8   5    0.28    0.08
 -18  -8   5    0.33    0.09
 -18  -8   5    0.31    0.07
 -18   8   5    0.38    0.08
  18   8  -5    0.19    0.05
 -16  -8   5    0.13    0.07
 -16  -8   5    0.08    0.07
 -16  -8   5    0.24    0.09
 -16   8   5    0.08    0.06
  16   8  -5    0.14    0.05
 -14  -8   5    0.71    0.12
 -14  -8   5    0.62    0.11
 -14   8   5    0.75    0.11
  14   8  -5    0.76    0.09
  14   8  -5    0.64    0.14
 -14   8   5    0.88    0.08
 -12  -8   5    0.04    0.07
 -12  -8   5    0.00    0.06
  12   8  -5    0.01    0.08
 -12   8   5    0.01    0.06
 -12   8   5    0.07    0.05
  12   8  -5    0.01    0.05
 -10  -8   5    1.13    0.16
 -10   8   5    1.43    0.15
  10   8  -5    1.10    0.12
  10   8  -5    1.02    0.18
 -10   8   5    1.22    0.13
  -8  -8   5    0.62    0.12
   8   8  -5    0.64    0.09
   8   8  -5    0.56    0.15
  -8   8   5    0.55    0.10
  -8   8   5    0.54    0.10
  -6  -8   5    1.82    0.19
  -6   8   5    2.09    0.19
   6   8  -5    1.67    0.15
  -6   8   5    1.93    0.18
   6   8  -5    2.14    0.27
  -4  -8   5    1.71    0.18
   4   8  -5    1.14    0.20
   4   8  -5    1.44    0.17
  -4   8   5    1.41    0.15
  -2  -8   5    0.89    0.13
  -2   8   5    0.41    0.09
   2   8  -5    0.42    0.11
   0  -8   5    1.02    0.14
   0   8  -5    1.09    0.13
   0   8   5    0.96    0.13
   2  -8   5    0.25    0.09
  -2  -8  -5    0.37    0.10
  -2   8  -5    0.27    0.08
  -2   8  -5    0.49    0.12
   2   8   5    0.29    0.08
  -4  -8  -5    0.39    0.11
   4  -8   5    0.30    0.09
  -4   8  -5    0.33    0.10
   4   8   5    0.35    0.08
  -4   8  -5    0.37    0.07
   6  -8   5    0.02    0.06
  -6  -8  -5    0.12    0.08
  -6   8  -5    0.07    0.04
  -6   8  -5    0.01    0.07
   6   8   5    0.14    0.06
  -8  -8  -5    0.12    0.08
  -8  -8  -5    0.05    0.07
   8   8   5    0.27    0.07
  -8   8  -5    0.37    0.08
 -10  -8  -5    0.51    0.10
 -10  -8  -5    0.54    0.08
 -10  -8  -5    0.35    0.10
 -10   8  -5    0.39    0.07
  10   8   5    0.47    0.09
 -12  -8  -5    0.12    0.08
 -12  -8  -5    0.10    0.05
 -12  -8  -5    0.18    0.07
  12   8   5    0.22    0.06
 -14  -8  -5   -0.01    0.04
 -14  -8  -5    0.02    0.05
 -14  -8  -5    0.03    0.06
 -14  -8  -5    0.03    0.06
  14   8   5    0.09    0.05
 -16  -8  -5    0.19    0.08
 -16  -8  -5    0.39    0.06
 -16  -8  -5    0.29    0.07
 -16  -8  -5    0.28    0.05
  16   8   5    0.34    0.07
 -18  -8  -5    0.01    0.03
 -18  -8  -5   -0.02    0.06
 -18  -8  -5    0.04    0.05
  18   8   5    0.02    0.04
 -20  -8  -5    0.07    0.05
 -20  -8  -5    0.03    0.05
 -20  -8  -5    0.09    0.03
 -21  -9   5    0.11    0.05
 -21  -9   5    0.08    0.04
 -21  -9   5    0.06    0.05
 -21   9   5    0.11    0.04
  21   9  -5    0.09    0.04
 -19  -9   5    0.08    0.05
 -19  -9   5    0.08    0.06
 -19  -9   5    0.09    0.05
 -19   9   5    0.07    0.04
  19   9  -5    0.11    0.04
 -17  -9   5    0.09    0.06
 -17  -9   5    0.11    0.06
 -17  -9   5    0.08    0.05
 -17   9   5    0.10    0.05
  17   9  -5    0.13    0.05
 -15  -9   5    0.10    0.06
 -15  -9   5    0.00    0.06
 -15  -9   5   -0.05    0.05
 -15   9   5    0.01    0.04
  15   9  -5    0.00    0.04
 -13  -9   5    0.07    0.06
 -13   9   5    0.01    0.03
  13   9  -5    0.03    0.04
 -13   9   5    0.02    0.05
 -11  -9   5    0.36    0.09
 -11   9   5    0.32    0.06
 -11   9   5    0.45    0.08
  11   9  -5    0.33    0.07
  -9  -9   5    0.23    0.08
   9   9  -5    0.27    0.07
  -9   9   5    0.13    0.06
  -9   9   5    0.23    0.06
  -7  -9   5    0.14    0.08
   7   9  -5    0.34    0.07
  -7   9   5    0.13    0.06
   7   9  -5    0.22    0.09
  -7   9   5    0.19    0.07
  -5  -9   5    0.03    0.06
   5   9  -5    0.28    0.09
  -5   9   5    0.06    0.06
  -5   9   5    0.03    0.07
  -3  -9   5    0.06    0.06
   3   9  -5    0.17    0.08
  -3   9   5    0.09    0.07
  -3   9   5    0.25    0.09
  -1  -9   5    0.26    0.08
  -1   9   5    0.34    0.08
   1   9  -5    0.27    0.08
   1  -9   5    0.08    0.07
  -1   9  -5    0.06    0.05
   1   9   5    0.05    0.06
  -1   9  -5    0.04    0.08
  -3  -9  -5    0.17    0.08
   3  -9   5    0.13    0.07
   3   9   5    0.12    0.06
  -3   9  -5    0.03    0.07
  -3   9  -5    0.14    0.05
  -5  -9  -5   -0.03    0.06
   5  -9   5    0.03    0.06
  -5   9  -5    0.00    0.06
   5   9   5    0.11    0.06
  -7  -9  -5    0.51    0.09
  -7  -9  -5    0.35    0.09
   7   9   5    0.40    0.08
  -7   9  -5    0.37    0.07
  -9  -9  -5    0.30    0.08
  -9  -9  -5    0.23    0.08
   9   9   5    0.21    0.06
 -11  -9  -5    0.45    0.08
 -11  -9  -5    0.46    0.10
  11   9   5    0.45    0.07
 -13  -9  -5    0.16    0.05
 -13  -9  -5    0.08    0.06
  13   9   5    0.18    0.05
 -15  -9  -5    0.18    0.06
  15   9   5    0.05    0.04
 -17  -9  -5    0.02    0.04
 -16 -10   5    0.01    0.04
 -16 -10   5    0.02    0.04
 -16  10   5    0.00    0.03
 -14 -10   5    0.09    0.05
 -14 -10   5    0.03    0.05
  14  10  -5    0.07    0.04
 -14  10   5    0.02    0.04
 -12 -10   5    0.15    0.06
  12  10  -5    0.19    0.05
 -12  10   5    0.19    0.05
 -10 -10   5    0.06    0.05
 -10  10   5    0.04    0.04
  10  10  -5    0.00    0.04
  10  10  -5   -0.04    0.06
  -8 -10   5    0.05    0.05
   8  10  -5    0.06    0.06
  -8  10   5   -0.03    0.04
  -8  10   5   -0.02    0.03
  -6 -10   5    0.07    0.06
   6  10  -5    0.12    0.06
  -6  10   5   -0.01    0.04
  -6  10   5    0.15    0.05
  -4 -10   5    0.15    0.06
   4  10  -5    0.23    0.06
  -4  10   5    0.22    0.06
  -4  10   5    0.10    0.06
  -2 -10   5    0.14    0.06
  -2  10   5   -0.01    0.05
   2  10  -5    0.07    0.05
  -2  10   5    0.11    0.06
   0 -10   5    0.09    0.05
   0  10   5    0.01    0.05
   0  10  -5    0.06    0.06
   0  10   5   -0.05    0.06
   0  10  -5    0.08    0.04
   2 -10   5    0.01    0.05
   2  10   5    0.03    0.05
  -2  10  -5   -0.04    0.05
  -4 -10  -5    0.17    0.07
  -4  10  -5    0.23    0.06
   4  10   5    0.21    0.06
  -6 -10  -5   -0.04    0.05
  -6 -10  -5    0.03    0.05
   6  10   5    0.04    0.04
  -8 -10  -5    0.04    0.06
  -8 -10  -5    0.06    0.05
   8  10   5    0.10    0.05
 -10 -10  -5    0.03    0.05
 -10 -10  -5    0.06    0.04
  10  10   5    0.03    0.04
 -12 -10  -5    0.05    0.04
 -38   0   6    0.03    0.02
 -36   0   6    0.02    0.04
 -36   0   6    0.03    0.03
 -34   0   6    0.27    0.08
 -34   0   6    0.22    0.05
 -34   0   6    0.29    0.08
 -32   0   6    0.48    0.07
 -32   0   6    0.78    0.12
 -32   0   6    0.42    0.09
 -30   0   6    2.74    0.17
 -30   0   6    2.83    0.24
 -30   0   6    2.29    0.22
 -28   0   6    4.61    0.30
 -28   0   6    4.91    0.26
 -28   0   6    4.54    0.30
 -26   0   6   24.72    1.15
 -26   0   6   24.78    1.06
 -26   0   6   26.61    1.19
 -24   0   6   15.94    0.73
 -24   0   6   12.16    0.68
 -22   0   6    2.30    0.20
 -22   0   6    2.31    0.21
 -20   0   6    1.15    0.13
 -20   0   6    0.96    0.12
 -20   0   6    1.03    0.12
 -18   0   6    5.98    0.34
 -18   0   6    6.01    0.31
 -18   0   6    6.49    0.33
 -16   0   6   13.76    0.66
 -16   0   6   13.43    0.61
 -16   0   6   13.96    0.63
 -14   0   6  149.68    6.12
 -14   0   6  154.56    6.55
 -14   0   6  149.88    6.33
 -12   0   6   19.05    0.85
 -12   0   6   18.81    0.79
 -12   0   6   18.21    0.82
  10   0  -6  120.75    5.45
 -10   0   6  127.41    5.41
 -10   0   6  128.79    5.05
 -10   0   6  123.77    5.23
  -8   0   6    3.62    0.19
  -8   0   6    3.62    0.19
  -8   0   6    4.01    0.18
  -8   0   6    3.70    0.18
   8   0  -6    3.55    0.20
  -6   0   6    9.04    0.44
   6   0  -6   10.20    0.46
  -6   0   6   10.07    0.42
  -6   0   6   10.03    0.43
  -6   0   6    9.87    0.45
  -4   0   6    5.24    0.25
   4   0  -6    5.05    0.26
  -4   0   6    5.46    0.23
  -4   0   6    5.19    0.24
  -2   0   6    7.80    0.36
  -2   0   6    7.76    0.34
   2   0  -6    7.52    0.36
  -2   0   6    7.60    0.33
   0   0   6    9.32    0.42
   0   0   6    9.56    0.40
   2   0   6   71.38    2.81
   2   0   6   67.30    2.90
   4   0   6   14.53    0.62
   4   0   6   14.78    0.64
   6   0   6    0.03    0.03
   6   0   6    0.00    0.03
   8   0   6    0.03    0.03
  10   0   6   39.79    1.70
  12   0   6    0.25    0.06
 -12   0  -6    0.22    0.08
 -14   0  -6    0.05    0.07
  14   0   6    0.06    0.05
  16   0   6    3.66    0.22
 -37  -1   6    0.21    0.04
 -37  -1   6    0.22    0.05
 -37  -1   6    0.23    0.06
 -37   1   6    0.15    0.04
 -35  -1   6    0.53    0.08
 -35  -1   6    0.62    0.10
 -35  -1   6    0.53    0.06
 -35   1   6    0.61    0.09
 -35   1   6    0.38    0.06
 -33  -1   6    0.15    0.06
 -33  -1   6    0.35    0.09
 -33  -1   6    0.21    0.05
 -33   1   6    0.14    0.05
 -33   1   6    0.15    0.07
 -31  -1   6    0.33    0.09
 -31  -1   6    0.38    0.10
 -31  -1   6    0.25    0.06
 -31   1   6    0.21    0.08
 -31   1   6    0.23    0.06
 -29  -1   6    0.53    0.08
 -29  -1   6    0.48    0.11
 -29  -1   6    0.63    0.11
 -29   1   6    0.56    0.11
 -29   1   6    0.69    0.10
 -29   1   6    0.37    0.10
 -27  -1   6    2.13    0.20
 -27  -1   6    1.69    0.18
 -27  -1   6    2.07    0.16
 -27   1   6    2.45    0.22
 -27   1   6    2.76    0.23
 -27   1   6    2.10    0.18
 -25  -1   6    1.18    0.16
 -25  -1   6    0.78    0.12
 -25  -1   6    0.75    0.12
 -25  -1   6    0.83    0.10
 -25   1   6    0.78    0.12
 -25   1   6    0.78    0.11
 -23  -1   6    0.75    0.12
 -23  -1   6    0.54    0.11
 -23  -1   6    0.58    0.11
 -23   1   6    0.63    0.12
 -21  -1   6    1.73    0.16
 -21  -1   6    1.43    0.16
 -21  -1   6    1.51    0.16
 -21   1   6    1.47    0.16
 -19  -1   6    0.85    0.10
 -19  -1   6    0.62    0.10
 -19  -1   6    0.78    0.11
 -19   1   6    0.62    0.10
 -19   1   6    0.85    0.10
 -17  -1   6    0.44    0.08
 -17  -1   6    0.38    0.07
 -17  -1   6    0.21    0.06
 -17   1   6    0.54    0.08
 -17   1   6    0.32    0.06
 -17   1   6    0.28    0.07
 -15  -1   6    1.03    0.10
 -15  -1   6    0.72    0.09
 -15  -1   6    0.60    0.08
 -15   1   6    0.36    0.07
 -15   1   6    0.69    0.08
 -15   1   6    0.57    0.07
 -13  -1   6    1.88    0.14
 -13  -1   6    1.85    0.12
 -13  -1   6    1.76    0.12
 -13   1   6    1.80    0.11
 -13   1   6    1.70    0.12
 -13   1   6    1.65    0.13
 -11  -1   6    3.53    0.18
  11  -1  -6    3.34    0.19
 -11  -1   6    3.04    0.17
 -11  -1   6    3.38    0.18
 -11  -1   6    3.33    0.19
 -11   1   6    3.11    0.18
  11   1  -6    3.49    0.20
 -11   1   6    3.27    0.17
 -11   1   6    3.71    0.20
  -9  -1   6    1.33    0.10
  -9  -1   6    1.13    0.09
  -9  -1   6    1.36    0.09
   9  -1  -6    1.48    0.10
  -9   1   6    1.27    0.10
  -9   1   6    1.39    0.09
   9   1  -6    1.25    0.11
  -9   1   6    1.34    0.08
   7  -1  -6    0.65    0.07
  -7  -1   6    0.63    0.06
  -7  -1   6    0.56    0.06
  -7  -1   6    0.66    0.06
   7   1  -6    0.55    0.07
  -7   1   6    0.58    0.06
  -7   1   6    0.51    0.05
  -7   1   6    0.56    0.04
  -7   1   6    0.62    0.05
  -5  -1   6   10.06    0.43
  -5  -1   6    9.98    0.46
   5  -1  -6   10.63    0.47
  -5  -1   6    9.81    0.44
  -5  -1   6   10.07    0.45
  -5   1   6   10.06    0.44
  -5   1   6    9.95    0.42
  -5   1   6    9.66    0.45
  -3  -1   6    2.78    0.13
   3  -1  -6    2.95    0.15
  -3  -1   6    2.68    0.14
  -3  -1   6    2.43    0.14
  -3  -1   6    2.78    0.14
  -3   1   6    2.74    0.14
  -3   1   6    2.90    0.14
  -1  -1   6    0.15    0.03
  -1  -1   6    0.07    0.02
  -1  -1   6    0.18    0.03
  -1  -1   6    0.17    0.03
   1  -1  -6    0.18    0.03
  -1   1   6    0.15    0.03
  -1   1   6    0.20    0.03
   3  -1   6    5.46    0.26
   3  -1   6    5.73    0.26
   3  -1   6    5.88    0.26
   3  -1   6    5.78    0.28
   3   1   6    5.70    0.26
   3   1   6    5.65    0.27
   5  -1   6    2.57    0.14
   5  -1   6    2.75    0.14
   5  -1   6    2.83    0.16
   5   1   6    2.90    0.16
   7  -1   6    1.45    0.11
  -7  -1  -6    1.57    0.11
   7  -1   6    1.50    0.10
   7  -1   6    1.39    0.09
   7   1   6    1.50    0.11
  -9  -1  -6    1.68    0.12
   9  -1   6    1.80    0.13
   9  -1   6    1.82    0.11
   9  -1   6    1.89    0.12
   9   1   6    1.93    0.13
  11  -1   6    7.40    0.34
  11  -1   6    7.15    0.37
 -11  -1  -6    7.11    0.36
  11  -1   6    7.35    0.35
  11   1   6    7.38    0.37
  13  -1   6    0.05    0.05
 -13  -1  -6    0.10    0.08
 -13  -1  -6    0.11    0.05
  13   1   6    0.16    0.05
 -15  -1  -6    2.02    0.21
  15  -1   6    1.99    0.17
 -15  -1  -6    2.12    0.17
  15   1   6    1.86    0.17
 -17  -1  -6    0.56    0.10
 -17  -1  -6    0.78    0.14
  17   1   6    0.66    0.10
 -19  -1  -6    0.22    0.10
 -36  -2   6    0.39    0.07
 -36  -2   6    0.38    0.06
 -36  -2   6    0.36    0.05
 -36   2   6    0.28    0.05
 -34  -2   6    0.27    0.08
 -34  -2   6    0.41    0.08
 -34  -2   6    0.27    0.05
 -34   2   6    0.31    0.06
 -32  -2   6    0.86    0.09
 -32  -2   6    0.62    0.11
 -32  -2   6    0.62    0.10
 -32   2   6    0.73    0.11
 -32   2   6    0.65    0.09
 -30  -2   6    2.74    0.20
 -30  -2   6    2.52    0.22
 -30  -2   6    2.80    0.17
 -30   2   6    2.67    0.23
 -30   2   6    2.73    0.18
 -28  -2   6    0.48    0.10
 -28  -2   6    0.56    0.08
 -28  -2   6    0.45    0.10
 -28   2   6    0.40    0.11
 -28   2   6    0.64    0.10
 -26  -2   6   19.71    0.78
 -26  -2   6   20.13    0.83
 -26  -2   6   20.67    0.94
 -26  -2   6   17.85    0.90
 -26   2   6   19.58    0.92
 -26   2   6   19.38    0.84
 -24  -2   6    9.69    0.55
 -24  -2   6   12.43    0.59
 -22  -2   6    3.59    0.26
 -22  -2   6    4.03    0.26
 -22   2   6    3.92    0.26
 -20  -2   6    3.60    0.25
 -20  -2   6    3.80    0.25
 -20  -2   6    3.70    0.24
 -20   2   6    3.95    0.25
 -18  -2   6    3.89    0.24
 -18  -2   6    3.81    0.23
 -18  -2   6    3.50    0.23
 -18   2   6    3.64    0.23
 -16  -2   6   14.77    0.70
 -16  -2   6   16.70    0.76
 -16  -2   6   15.82    0.73
 -16   2   6   15.85    0.75
 -14  -2   6    9.05    0.45
 -14  -2   6    9.03    0.42
 -14  -2   6    8.50    0.44
 -14  -2   6    8.98    0.44
 -14   2   6    9.32    0.45
 -12  -2   6   27.28    1.15
 -12  -2   6   26.82    1.22
 -12  -2   6   26.10    1.19
 -12  -2   6   27.23    1.23
 -12   2   6   27.64    1.22
 -12   2   6   28.38    1.13
 -12   2   6   27.34    1.17
 -10  -2   6   17.18    0.78
 -10  -2   6   17.55    0.80
 -10  -2   6   18.36    0.75
  10  -2  -6   17.67    0.80
 -10  -2   6   17.82    0.81
 -10   2   6   17.13    0.77
 -10   2   6   16.94    0.74
 -10   2   6   18.31    0.80
   8  -2  -6   20.88    0.95
  -8  -2   6   20.75    0.95
  -8  -2   6   20.24    0.94
  -8  -2   6   21.44    0.92
  -8  -2   6   21.17    0.89
  -8   2   6   22.18    0.91
  -8   2   6   21.14    0.87
  -6  -2   6    0.43    0.05
   6  -2  -6    0.42    0.05
   6  -2  -6    0.50    0.06
  -6  -2   6    0.44    0.05
  -6  -2   6    0.41    0.05
  -6  -2   6    0.49    0.06
  -6   2   6    0.43    0.04
  -6   2   6    0.41    0.04
  -4  -2   6    2.42    0.13
  -4  -2   6    2.29    0.14
  -4  -2   6    2.52    0.13
   4  -2  -6    2.41    0.14
   4  -2  -6    2.23    0.13
  -4  -2   6    2.70    0.14
  -4   2   6    2.44    0.13
  -4   2   6    2.33    0.12
  -2  -2   6    0.52    0.05
  -2  -2   6    0.54    0.06
  -2  -2   6    0.58    0.06
  -2  -2   6    0.53    0.05
   2  -2  -6    0.57    0.06
  -2   2   6    0.51    0.05
  -2   2   6    0.54    0.05
   0  -2   6   34.15    1.42
   0  -2   6   30.98    1.36
   0  -2   6   30.79    1.41
   0  -2   6   32.06    1.31
   0  -2  -6   32.31    1.42
   0   2   6   33.91    1.33
   0   2   6   31.63    1.37
   2  -2   6    7.93    0.37
   2  -2   6    7.85    0.35
   2  -2   6    7.69    0.37
   2  -2   6    7.89    0.34
   2   2   6    7.89    0.35
   2   2   6    7.80    0.36
   4  -2   6   14.77    0.68
   4  -2   6   15.15    0.62
   4  -2   6   14.93    0.68
   4  -2   6   15.04    0.64
   4   2   6   14.90    0.67
   6  -2   6    9.42    0.44
  -6  -2  -6    8.95    0.44
   6  -2   6    9.33    0.45
   6  -2   6    9.44    0.40
   6   2   6    9.56    0.44
  -8  -2  -6    2.87    0.18
   8  -2   6    2.94    0.17
   8   2   6    2.72    0.17
  10  -2   6    2.15    0.15
 -10  -2  -6    2.14    0.15
  12  -2   6    7.69    0.39
 -12  -2  -6    8.27    0.49
 -12  -2  -6    7.49    0.40
 -14  -2  -6    0.78    0.14
 -14  -2  -6    0.78    0.11
 -16  -2  -6    4.35    0.28
 -16  -2  -6    4.88    0.35
  16   2   6    4.98    0.29
 -18  -2  -6    0.05    0.06
 -18  -2  -6    0.01    0.09
 -20  -2  -6    0.37    0.10
 -20  -2  -6    0.30    0.07
 -20  -2  -6    0.29    0.07
 -20  -2  -6    0.45    0.13
 -22  -2  -6    0.98    0.17
 -22  -2  -6    1.03    0.12
 -22  -2  -6    1.17    0.14
 -22  -2  -6    1.00    0.12
 -24  -2  -6    0.14    0.06
 -24  -2  -6    0.09    0.05
 -24  -2  -6    0.13    0.08
 -26  -2  -6    0.21    0.06
 -37  -3   6   -0.01    0.02
 -37  -3   6    0.05    0.03
 -37   3   6    0.02    0.03
 -35  -3   6    0.09    0.05
 -35  -3   6    0.10    0.03
 -35  -3   6    0.07    0.04
 -35   3   6    0.15    0.04
 -33  -3   6    0.13    0.04
 -33  -3   6    0.07    0.06
 -33  -3   6    0.09    0.05
 -33   3   6    0.24    0.06
 -31  -3   6    1.04    0.13
 -31  -3   6    1.33    0.14
 -31  -3   6    1.19    0.11
 -31   3   6    1.25    0.12
 -29  -3   6    1.56    0.17
 -29  -3   6    1.63    0.16
 -29  -3   6    1.44    0.13
 -29   3   6    1.40    0.14
 -27  -3   6    1.19    0.11
 -27  -3   6    1.11    0.09
 -27  -3   6    1.04    0.14
 -27  -3   6    1.03    0.13
 -27   3   6    1.04    0.13
 -25  -3   6    4.07    0.26
 -25  -3   6    4.35    0.23
 -25  -3   6    4.26    0.21
 -25  -3   6    4.26    0.28
 -25   3   6    4.31    0.20
 -25   3   6    3.83    0.24
 -23  -3   6    1.00    0.10
 -23  -3   6    1.16    0.11
 -23  -3   6    1.25    0.14
 -23  -3   6    1.04    0.13
 -23   3   6    1.01    0.12
  21  -3  -6    1.11    0.16
 -21  -3   6    1.33    0.16
 -21  -3   6    0.94    0.14
 -19  -3   6    0.95    0.13
 -19  -3   6    0.96    0.12
 -19  -3   6    0.96    0.12
 -17  -3   6    0.64    0.10
 -17  -3   6    1.00    0.12
 -17  -3   6    0.81    0.11
  15  -3  -6    3.79    0.25
 -15  -3   6    3.87    0.23
 -15  -3   6    3.89    0.24
 -15  -3   6    3.59    0.23
 -15  -3   6    3.87    0.23
 -13  -3   6    2.40    0.16
 -13  -3   6    2.19    0.15
 -13  -3   6    2.35    0.16
 -13  -3   6    2.33    0.17
  13  -3  -6    2.50    0.18
 -11  -3   6    1.70    0.12
 -11  -3   6    1.48    0.12
 -11  -3   6    1.68    0.12
  11  -3  -6    1.71    0.15
 -11  -3   6    1.56    0.14
  -9  -3   6    2.67    0.17
   9  -3  -6    2.43    0.17
  -9  -3   6    2.64    0.16
   9  -3  -6    2.54    0.16
  -9  -3   6    2.54    0.16
  -9  -3   6    3.71    0.18
  -7  -3   6    4.83    0.25
  -7  -3   6    5.18    0.26
   7  -3  -6    4.83    0.26
  -7  -3   6    5.08    0.27
   7  -3  -6    5.13    0.27
  -7  -3   6    4.93    0.24
  -7   3   6    5.06    0.23
  -7   3   6    5.17    0.24
   5  -3  -6    9.24    0.44
  -5  -3   6    9.44    0.45
  -5  -3   6    9.28    0.43
  -5  -3   6    9.39    0.45
  -5  -3   6    9.35    0.42
   5  -3  -6    9.40    0.45
  -5   3   6    9.37    0.42
  -5   3   6    9.68    0.40
   3  -3  -6    2.97    0.17
  -3  -3   6    3.15    0.17
  -3  -3   6    2.70    0.15
  -3  -3   6    3.03    0.17
  -3  -3   6    2.91    0.15
  -3   3   6    2.69    0.14
  -3   3   6    2.64    0.15
   1  -3  -6    9.38    0.44
  -1  -3   6    9.41    0.44
  -1  -3   6    9.30    0.40
  -1  -3   6    8.57    0.44
  -1  -3   6    9.08    0.41
  -1   3   6    9.47    0.42
  -1   3   6    9.58    0.41
  -1  -3  -6   25.04    1.14
   1  -3   6   25.38    1.05
   1  -3   6   25.63    1.14
   1  -3   6   25.25    1.14
   1   3   6   26.14    1.11
   1   3   6   26.36    1.07
   3  -3   6    3.31    0.19
   3  -3   6    3.47    0.19
   3   3   6    3.32    0.19
  -5  -3  -6    9.73    0.47
   5  -3   6   10.13    0.48
   5  -3   6   10.04    0.48
   5   3   6    9.99    0.47
   7  -3   6    4.33    0.24
   7  -3   6    4.29    0.23
  -7  -3  -6    4.12    0.24
   7   3   6    4.15    0.23
   9  -3   6    0.14    0.05
   9  -3   6    0.06    0.04
  -9  -3  -6    0.10    0.05
 -11  -3  -6    2.42    0.18
  11  -3   6    2.65    0.17
 -11  -3  -6    2.85    0.24
 -13  -3  -6    0.00    0.05
 -13  -3  -6   -0.02    0.07
 -15  -3  -6    0.66    0.11
 -15  -3  -6    0.59    0.10
 -15  -3  -6    0.48    0.12
  15   3   6    0.70    0.11
 -17  -3  -6    0.17    0.07
 -17  -3  -6    0.36    0.08
 -17  -3  -6    0.20    0.10
 -19  -3  -6    0.53    0.14
 -19  -3  -6    0.53    0.13
 -19  -3  -6    0.40    0.09
 -19  -3  -6    0.46    0.08
 -19  -3  -6    0.41    0.08
 -21  -3  -6    1.16    0.15
 -21  -3  -6    1.44    0.14
 -21  -3  -6    1.24    0.19
 -21  -3  -6    1.03    0.16
 -21  -3  -6    1.06    0.12
 -23  -3  -6    0.23    0.06
 -23  -3  -6    0.31    0.07
 -23  -3  -6    0.16    0.08
 -25  -3  -6    0.39    0.08
 -25  -3  -6    0.64    0.09
 -25  -3  -6    0.47    0.08
 -27  -3  -6    0.29    0.06
 -27  -3  -6    0.29    0.06
 -29  -3  -6    0.43    0.06
 -36  -4   6    0.03    0.02
 -36  -4   6    0.07    0.03
 -36   4   6    0.10    0.03
 -34  -4   6    0.37    0.06
 -34  -4   6    0.40    0.07
 -34  -4   6    0.44    0.05
 -34   4   6    0.32    0.05
 -32  -4   6    0.41    0.08
 -32  -4   6    0.46    0.08
 -32  -4   6    0.41    0.06
 -32   4   6    0.46    0.07
 -30  -4   6    0.08    0.06
 -30  -4   6    0.03    0.05
 -30  -4   6    0.10    0.04
 -30   4   6    0.13    0.05
 -28  -4   6    0.54    0.09
 -28  -4   6    0.65    0.11
 -28  -4   6    0.69    0.08
 -28  -4   6    0.54    0.11
 -28   4   6    0.45    0.09
 -26  -4   6    1.83    0.13
 -26  -4   6    1.70    0.17
 -26  -4   6    1.95    0.15
 -26  -4   6    2.02    0.19
 -26  -4   6    1.97    0.20
 -26   4   6    2.20    0.18
 -24  -4   6    2.11    0.20
 -24  -4   6    1.71    0.19
 -24  -4   6    2.02    0.15
 -24  -4   6    1.89    0.17
 -24  -4   6    1.80    0.14
 -24   4   6    2.61    0.20
 -22  -4   6    2.54    0.16
 -22  -4   6    2.41    0.18
 -22  -4   6    2.77    0.22
 -22  -4   6    2.76    0.17
 -22   4   6    2.85    0.21
 -20  -4   6    0.22    0.08
 -20  -4   6    0.17    0.08
 -20  -4   6    0.09    0.07
  20  -4  -6    0.21    0.09
 -18  -4   6    0.41    0.11
 -18  -4   6    0.45    0.09
 -18  -4   6    0.56    0.10
  18  -4  -6    0.54    0.11
  16  -4  -6    1.31    0.16
 -16  -4   6    1.28    0.14
 -16  -4   6    1.17    0.14
 -16  -4   6    1.14    0.13
 -16  -4   6    1.46    0.16
  14  -4  -6    0.36    0.08
 -14  -4   6    0.31    0.07
 -14  -4   6    0.31    0.07
 -14  -4   6    0.28    0.08
 -14  -4   6    0.41    0.09
 -12  -4   6    3.37    0.22
 -12  -4   6    3.58    0.22
  12  -4  -6    3.40    0.22
 -12  -4   6    3.17    0.20
 -12  -4   6    3.57    0.22
 -10  -4   6    1.07    0.11
 -10  -4   6    0.93    0.11
 -10  -4   6    0.90    0.10
 -10  -4   6    1.00    0.11
  10  -4  -6    1.20    0.12
  -8  -4   6    7.33    0.36
  -8  -4   6    7.32    0.37
   8  -4  -6    7.59    0.37
  -8  -4   6    6.98    0.34
  -8  -4   6    6.78    0.37
  -6  -4   6    4.27    0.23
  -6  -4   6    4.12    0.22
   6  -4  -6    4.04    0.23
  -6  -4   6    3.71    0.21
   6  -4  -6    3.93    0.22
  -6  -4   6    3.94    0.23
  -4  -4   6    4.68    0.25
   4  -4  -6    4.07    0.24
  -4  -4   6    4.30    0.22
  -4  -4   6    4.77    0.25
  -2  -4   6    2.07    0.14
   2  -4  -6    1.96    0.13
  -2  -4   6    1.81    0.13
  -2   4   6    1.88    0.12
   0  -4   6   13.04    0.61
   0  -4   6   12.48    0.60
   0  -4  -6   12.74    0.60
   0   4   6   13.20    0.58
   0   4   6   12.44    0.55
  -2  -4  -6    1.07    0.08
   2  -4   6    1.07    0.10
   2  -4   6    0.73    0.09
   2   4   6    0.96    0.09
   2   4   6    0.90    0.09
   4  -4   6    0.65    0.09
   4  -4   6    0.50    0.07
   4   4   6    0.50    0.07
   6  -4   6    2.05    0.15
   6  -4   6    1.84    0.14
  -6  -4  -6    2.07    0.15
   6   4   6    2.07    0.15
  -8  -4  -6    4.89    0.27
   8  -4   6    4.40    0.27
   8  -4   6    4.63    0.26
   8   4   6    4.68    0.26
 -10  -4  -6    0.82    0.15
 -10  -4  -6    0.86    0.11
  10  -4   6    0.79    0.11
  10   4   6    0.85    0.11
 -12  -4  -6    1.01    0.17
 -12  -4  -6    1.04    0.13
  12   4   6    1.30    0.14
 -14  -4  -6    0.11    0.07
 -14  -4  -6    0.13    0.10
 -14  -4  -6    0.10    0.06
  14   4   6    0.12    0.06
 -16  -4  -6    0.59    0.10
 -16  -4  -6    0.63    0.11
 -16  -4  -6    0.43    0.13
 -16  -4  -6    0.72    0.11
 -16  -4  -6    0.39    0.12
 -18  -4  -6    0.29    0.08
 -18  -4  -6    0.29    0.08
 -18  -4  -6    0.31    0.08
 -18  -4  -6    0.23    0.12
 -18  -4  -6    0.49    0.12
 -20  -4  -6    0.30    0.07
 -20  -4  -6    0.31    0.11
 -20  -4  -6    0.33    0.12
 -20  -4  -6    0.19    0.07
 -20  -4  -6    0.26    0.08
 -22  -4  -6    0.06    0.08
 -22  -4  -6    0.04    0.06
 -22  -4  -6    0.12    0.06
 -22  -4  -6    0.02    0.04
 -24  -4  -6    0.30    0.07
 -24  -4  -6    0.18    0.06
 -24  -4  -6    0.12    0.05
 -26  -4  -6    0.06    0.06
 -26  -4  -6    0.03    0.04
 -26  -4  -6    0.00    0.04
 -28  -4  -6    0.07    0.04
 -28  -4  -6    0.03    0.03
 -28  -4  -6    0.03    0.04
 -33  -5   6    0.00    0.03
 -33  -5   6    0.05    0.04
 -33  -5   6    0.09    0.04
 -33   5   6    0.10    0.04
 -31  -5   6    0.09    0.05
 -31  -5   6    0.13    0.05
 -31  -5   6    0.02    0.03
 -31  -5   6    0.10    0.07
 -31   5   6    0.03    0.04
 -29  -5   6    1.17    0.10
 -29  -5   6    1.07    0.12
 -29  -5   6    0.98    0.13
 -29  -5   6    0.99    0.11
 -29   5   6    1.33    0.13
 -27  -5   6    0.27    0.09
 -27  -5   6    0.26    0.06
 -27  -5   6    0.33    0.08
 -27  -5   6    0.25    0.05
 -27  -5   6    0.33    0.08
  27   5  -6    0.29    0.10
 -27   5   6    0.35    0.08
 -25  -5   6    0.67    0.09
 -25  -5   6    0.94    0.12
 -25  -5   6    0.86    0.12
 -25  -5   6    0.76    0.09
 -25  -5   6    0.65    0.12
 -25   5   6    0.72    0.11
  25   5  -6    0.78    0.14
 -23  -5   6    0.98    0.15
 -23  -5   6    1.58    0.16
 -23  -5   6    1.06    0.11
 -23  -5   6    0.95    0.12
 -23  -5   6    1.09    0.11
  23   5  -6    1.04    0.16
 -23   5   6    1.24    0.14
 -21  -5   6    0.13    0.07
 -21  -5   6    0.15    0.06
 -21  -5   6    0.20    0.05
 -21  -5   6    0.26    0.09
 -21   5   6    0.17    0.07
  21   5  -6    0.19    0.09
 -19  -5   6    3.16    0.18
 -19  -5   6    2.84    0.24
  19   5  -6    3.33    0.24
 -19   5   6    2.94    0.20
 -17  -5   6    0.05    0.08
 -17  -5   6    0.03    0.07
 -17  -5   6    0.03    0.07
  17  -5  -6   -0.01    0.07
 -15  -5   6    0.22    0.09
 -15  -5   6    0.38    0.09
  15  -5  -6    0.33    0.09
 -15  -5   6    0.34    0.09
  13  -5  -6    2.59    0.19
 -13  -5   6    2.44    0.21
 -13  -5   6    2.29    0.19
 -13  -5   6    2.63    0.22
 -13  -5   6    1.86    0.18
 -11  -5   6    0.87    0.10
  11  -5  -6    0.76    0.11
 -11  -5   6    0.61    0.10
 -11  -5   6    0.68    0.11
  -9  -5   6    1.74    0.16
  -9  -5   6    1.82    0.17
   9  -5  -6    1.63    0.15
  -7  -5   6    0.87    0.11
   7  -5  -6    1.13    0.12
  -7  -5   6    1.15    0.12
   7  -5  -6    1.25    0.13
   5  -5  -6    3.70    0.23
  -5  -5   6    3.61    0.23
  -5  -5   6    3.85    0.23
   3  -5  -6    3.38    0.20
  -3  -5   6    3.03    0.21
  -3  -5   6    3.72    0.22
   1  -5  -6   11.21    0.55
  -1  -5   6   10.79    0.55
  -1  -5   6   12.26    0.57
   1  -5   6    1.87    0.16
   1  -5   6    1.38    0.13
  -1  -5  -6    1.72    0.12
   3  -5   6    0.23    0.07
   3  -5   6    0.23    0.06
   5  -5   6    7.54    0.38
   5  -5   6    6.84    0.39
   5   5   6    7.66    0.38
   7  -5   6    1.53    0.14
   7  -5   6    1.60    0.16
   7   5   6    2.11    0.17
  -9  -5  -6    0.07    0.09
   9  -5   6   -0.01    0.06
   9   5   6    0.01    0.05
 -11  -5  -6    0.14    0.06
 -11  -5  -6    0.11    0.10
  11   5   6    0.22    0.08
 -13  -5  -6    0.57    0.11
 -13  -5  -6    0.66    0.10
 -13  -5  -6    0.72    0.09
 -13  -5  -6    0.58    0.13
 -13  -5  -6    0.84    0.16
 -13  -5  -6    0.72    0.10
 -15  -5  -6    0.70    0.14
 -15  -5  -6    0.47    0.09
 -15  -5  -6    0.59    0.11
 -15  -5  -6    0.48    0.09
 -15  -5  -6    0.44    0.07
 -15  -5  -6    0.59    0.14
 -17  -5  -6    2.00    0.18
 -17  -5  -6    1.82    0.21
 -17  -5  -6    2.46    0.21
 -17  -5  -6    2.12    0.25
 -17  -5  -6    1.95    0.17
 -19  -5  -6    0.18    0.06
 -19  -5  -6    0.06    0.07
 -19  -5  -6    0.18    0.10
 -19  -5  -6    0.16    0.06
 -21  -5  -6    0.63    0.09
 -21  -5  -6    0.85    0.11
 -21  -5  -6    1.01    0.13
 -21  -5  -6    0.78    0.14
 -23  -5  -6    0.49    0.12
 -23  -5  -6    0.43    0.07
 -23  -5  -6    0.55    0.08
 -25  -5  -6    0.11    0.05
 -25  -5  -6    0.15    0.04
 -25  -5  -6    0.02    0.05
 -27  -5  -6    0.01    0.03
 -27  -5  -6    0.04    0.04
 -32  -6   6    0.16    0.05
 -32  -6   6    0.05    0.03
 -32   6   6    0.06    0.03
 -30  -6   6    0.11    0.05
 -30  -6   6    0.05    0.05
 -30  -6   6    0.06    0.03
 -30  -6   6    0.11    0.04
 -30   6   6    0.00    0.04
 -28  -6   6    0.06    0.04
 -28  -6   6    0.05    0.05
 -28  -6   6    0.10    0.07
 -28   6   6    0.08    0.05
 -26  -6   6    0.57    0.10
 -26  -6   6    0.64    0.07
 -26  -6   6    0.61    0.08
 -26  -6   6    0.52    0.09
 -26   6   6    0.54    0.09
 -24  -6   6    0.72    0.08
 -24  -6   6    0.72    0.09
 -24  -6   6    0.75    0.12
  24   6  -6    0.84    0.15
 -24   6   6    0.79    0.11
 -22  -6   6    2.76    0.18
 -22  -6   6    2.73    0.23
 -22  -6   6    2.88    0.17
 -22   6   6    2.51    0.21
  22   6  -6    2.26    0.25
 -20  -6   6    0.36    0.08
 -20  -6   6    0.22    0.06
 -20  -6   6    0.51    0.11
 -20   6   6    0.18    0.08
  20   6  -6    0.22    0.10
 -18  -6   6    0.48    0.10
 -18  -6   6    0.41    0.09
 -18  -6   6    0.38    0.07
 -18   6   6    0.42    0.09
  18   6  -6    0.48    0.13
 -18   6   6    0.42    0.06
 -16  -6   6    0.65    0.08
 -16  -6   6    0.26    0.08
 -16  -6   6    0.29    0.11
 -16   6   6    0.20    0.06
 -16   6   6    0.33    0.08
  16   6  -6    0.23    0.10
 -14  -6   6    0.45    0.07
 -14   6   6    0.44    0.08
  14   6  -6    0.36    0.11
 -14   6   6    0.41    0.09
 -12  -6   6    0.42    0.10
  12  -6  -6    0.35    0.09
 -12  -6   6    0.20    0.08
 -10  -6   6    1.26    0.15
 -10  -6   6    0.98    0.13
  -8  -6   6    0.31    0.08
  -8  -6   6    0.25    0.08
   8  -6  -6    0.23    0.08
   6  -6  -6    0.60    0.10
  -6  -6   6    0.68    0.11
  -6  -6   6    0.54    0.10
  -4  -6   6    0.29    0.08
   4  -6  -6    0.11    0.06
  -4  -6   6    0.22    0.07
  -2  -6   6    0.32    0.08
   2  -6  -6    0.25    0.07
  -2  -6   6    0.17    0.07
   0  -6   6    0.19    0.07
   0  -6   6    0.24    0.07
   0  -6  -6    0.29    0.06
   2  -6   6    0.64    0.10
   2  -6   6    0.62    0.10
   4  -6   6    0.75    0.10
   4  -6   6    0.73    0.12
  -6  -6  -6    1.50    0.19
  -6  -6  -6    1.39    0.14
   6  -6   6    1.67    0.17
  -8  -6  -6    0.49    0.09
  -8  -6  -6    0.57    0.09
  -8  -6  -6    0.53    0.13
  -8  -6  -6    0.41    0.08
  -8   6  -6    0.46    0.10
   8   6   6    0.46    0.09
 -10  -6  -6    0.37    0.12
 -10  -6  -6    0.42    0.08
 -10  -6  -6    0.22    0.09
 -10  -6  -6    0.36    0.10
 -10  -6  -6    0.35    0.08
 -10  -6  -6    0.32    0.08
 -10   6  -6    0.48    0.09
 -12  -6  -6    0.27    0.08
 -12  -6  -6    0.31    0.08
 -12  -6  -6    0.61    0.13
 -12  -6  -6    0.34    0.08
 -12  -6  -6    0.19    0.08
 -12  -6  -6    0.34    0.11
 -12   6  -6    0.35    0.07
 -14  -6  -6    0.03    0.05
 -14  -6  -6    0.13    0.07
 -14  -6  -6    0.02    0.07
 -14  -6  -6    0.16    0.06
 -14  -6  -6    0.02    0.05
 -14  -6  -6   -0.02    0.09
 -16  -6  -6    0.18    0.10
 -16  -6  -6    0.18    0.05
 -16  -6  -6    0.13    0.06
 -16  -6  -6    0.10    0.06
 -16  -6  -6    0.12    0.09
 -16  -6  -6    0.21    0.08
 -18  -6  -6    0.21    0.10
 -18  -6  -6    0.15    0.06
 -18  -6  -6    0.07    0.06
 -18  -6  -6    0.10    0.05
 -20  -6  -6    0.61    0.13
 -20  -6  -6    0.73    0.11
 -20  -6  -6    0.84    0.10
 -20  -6  -6    0.64    0.09
 -22  -6  -6    0.05    0.04
 -22  -6  -6    0.26    0.06
 -22  -6  -6    0.15    0.05
 -22  -6  -6    0.20    0.09
 -24  -6  -6    0.05    0.04
 -24  -6  -6    0.08    0.07
 -24  -6  -6    0.05    0.05
 -26  -6  -6   -0.01    0.02
 -26  -6  -6   -0.01    0.03
 -29  -7   6    0.14    0.05
 -29  -7   6    0.11    0.03
 -29   7   6    0.15    0.04
 -27  -7   6    0.38    0.07
 -27  -7   6    0.26    0.05
 -27   7   6    0.31    0.06
 -25  -7   6    0.56    0.07
 -25  -7   6    0.65    0.07
 -25  -7   6    0.54    0.09
 -25   7   6    0.49    0.08
 -23  -7   6    1.57    0.12
 -23  -7   6    1.44    0.12
 -23  -7   6    1.45    0.15
 -23   7   6    1.56    0.15
 -21  -7   6    1.03    0.11
 -21  -7   6    1.33    0.15
 -21  -7   6    1.21    0.11
  21   7  -6    1.40    0.19
 -21   7   6    1.14    0.13
 -19  -7   6    0.96    0.10
 -19  -7   6    0.87    0.13
 -19  -7   6    0.78    0.11
 -19  -7   6    0.82    0.13
  19   7  -6    1.36    0.19
 -19   7   6    1.06    0.13
 -17  -7   6    1.71    0.19
 -17  -7   6    1.92    0.17
 -17  -7   6    1.59    0.13
 -17  -7   6    1.86    0.18
  17   7  -6    1.39    0.20
 -17   7   6    1.58    0.16
 -17   7   6    1.66    0.10
 -15  -7   6    0.10    0.07
 -15  -7   6    0.20    0.09
 -15  -7   6    0.12    0.05
 -15   7   6    0.11    0.05
 -15   7   6    0.16    0.08
  15   7  -6    0.09    0.09
 -13  -7   6    2.96    0.21
 -13  -7   6    2.95    0.18
 -13  -7   6    3.04    0.23
  13   7  -6    3.39    0.32
 -13   7   6    2.83    0.22
 -13   7   6    3.06    0.19
 -11  -7   6    0.19    0.07
 -11  -7   6    0.15    0.08
 -11   7   6    0.06    0.07
  11   7  -6    0.13    0.10
  11   7  -6    0.08    0.05
 -11   7   6    0.17    0.07
  -9  -7   6    0.19    0.08
  -9   7   6    0.07    0.07
   9   7  -6    0.16    0.10
  -9   7   6    0.12    0.07
  -7  -7   6    0.18    0.08
  -7   7   6    0.31    0.09
   7   7  -6    0.23    0.10
  -5  -7   6    0.72    0.12
   5   7  -6    0.88    0.18
  -5   7   6    0.58    0.10
  -3  -7   6    0.01    0.06
   3   7  -6    0.15    0.10
   3   7  -6    0.01    0.09
  -3   7   6    0.04    0.06
  -1  -7   6    1.74    0.18
   1   7  -6    1.30    0.16
  -1   7   6    1.66    0.16
   1   7  -6    1.37    0.22
  -1  -7  -6    2.04    0.21
   1  -7   6    2.08    0.19
   1   7   6    2.33    0.19
  -1   7  -6    2.11    0.19
  -3  -7  -6    1.09    0.11
   3  -7   6    1.31    0.15
  -3  -7  -6    1.60    0.18
   3   7   6    1.14    0.13
  -3   7  -6    1.15    0.13
  -3   7  -6    1.19    0.16
  -5  -7  -6    2.87    0.18
  -5  -7  -6    2.28    0.23
  -5   7  -6    2.83    0.16
   5   7   6    2.66    0.18
  -5   7  -6    3.02    0.23
  -7  -7  -6    1.55    0.14
  -7  -7  -6    1.50    0.18
  -7  -7  -6    1.46    0.15
  -7   7  -6    1.63    0.16
   7   7   6    1.50    0.14
  -9  -7  -6    1.59    0.16
  -9  -7  -6    1.39    0.18
  -9  -7  -6    2.12    0.16
   9   7   6    1.82    0.16
  -9   7  -6    1.46    0.14
 -11  -7  -6    0.34    0.08
 -11  -7  -6    0.26    0.08
 -11  -7  -6    0.37    0.07
 -11  -7  -6    0.21    0.09
 -11   7  -6    0.26    0.06
  11   7   6    0.32    0.07
 -13  -7  -6    0.40    0.10
 -13  -7  -6    0.49    0.08
 -13  -7  -6    0.53    0.09
 -13  -7  -6    0.82    0.14
  13   7   6    0.39    0.08
 -15  -7  -6    0.65    0.08
 -15  -7  -6    0.55    0.08
 -15  -7  -6    0.77    0.11
 -15  -7  -6    0.82    0.14
 -17  -7  -6    0.83    0.10
 -17  -7  -6    0.68    0.10
 -17  -7  -6    0.78    0.13
 -19  -7  -6    0.21    0.08
 -19  -7  -6    0.20    0.05
 -19  -7  -6    0.14    0.06
 -21  -7  -6    0.38    0.06
 -21  -7  -6    0.37    0.09
 -21  -7  -6    0.10    0.03
 -23  -7  -6    0.05    0.04
 -23  -7  -6   -0.07    0.05
 -23  -7  -6    0.02    0.03
 -26  -8   6    0.06    0.04
  26   8  -6    0.05    0.03
 -26   8   6    0.00    0.03
 -24  -8   6    0.28    0.05
 -24  -8   6    0.24    0.06
 -24   8   6    0.24    0.05
  24   8  -6    0.26    0.05
 -22  -8   6    0.14    0.05
 -22  -8   6    0.27    0.07
  22   8  -6    0.08    0.04
 -22   8   6    0.17    0.06
 -20  -8   6    0.18    0.08
 -20  -8   6    0.28    0.06
 -20  -8   6    0.09    0.06
  20   8  -6    0.21    0.05
 -20   8   6    0.21    0.07
 -18  -8   6    0.32    0.08
 -18  -8   6    0.29    0.07
 -18  -8   6    0.36    0.10
 -18   8   6    0.31    0.08
 -16  -8   6    1.11    0.15
 -16  -8   6    0.96    0.12
  16   8  -6    0.97    0.17
  16   8  -6    1.02    0.10
 -16   8   6    0.88    0.12
 -14  -8   6    0.14    0.08
 -14  -8   6    0.01    0.06
  14   8  -6    0.25    0.11
 -14   8   6    0.16    0.05
 -14   8   6    0.13    0.07
  14   8  -6    0.05    0.05
 -12  -8   6    0.13    0.08
 -12  -8   6    0.23    0.08
 -12   8   6    0.20    0.06
  12   8  -6    0.12    0.09
 -12   8   6    0.25    0.08
  12   8  -6    0.22    0.06
 -10  -8   6    0.15    0.08
  10   8  -6    0.08    0.09
  10   8  -6    0.11    0.05
 -10   8   6    0.13    0.06
 -10   8   6    0.09    0.07
  -8  -8   6    0.16    0.08
   8   8  -6    0.19    0.11
  -8   8   6    0.23    0.08
  -8   8   6    0.27    0.09
  -6  -8   6    0.29    0.09
   6   8  -6    0.45    0.14
   6   8  -6    0.26    0.10
  -6   8   6    0.29    0.09
  -6   8   6    0.18    0.08
  -4  -8   6    0.01    0.07
  -4   8   6    0.06    0.07
   4   8  -6    0.09    0.09
   4   8  -6    0.00    0.08
  -2  -8   6    1.38    0.16
   2   8  -6    0.96    0.14
  -2   8   6    1.29    0.14
   0  -8   6    0.72    0.12
   0   8   6    0.47    0.09
   0   8  -6    0.86    0.12
  -2  -8  -6    0.03    0.08
   2  -8   6    0.10    0.07
  -2   8  -6    0.03    0.08
   2   8   6   -0.01    0.06
  -2   8  -6    0.09    0.06
  -4  -8  -6    0.13    0.08
   4  -8   6    0.26    0.08
  -4   8  -6    0.18    0.05
  -4   8  -6    0.11    0.08
   4   8   6    0.07    0.06
  -6  -8  -6    0.17    0.09
  -6  -8  -6    0.34    0.09
   6  -8   6    0.51    0.10
   6   8   6    0.39    0.08
  -6   8  -6    0.38    0.09
  -8  -8  -6    0.34    0.09
  -8  -8  -6    0.36    0.07
  -8  -8  -6    0.28    0.09
  -8   8  -6    0.33    0.08
   8   8   6    0.37    0.08
 -10  -8  -6    0.22    0.09
 -10  -8  -6    0.13    0.07
 -10  -8  -6    0.36    0.07
  10   8   6    0.33    0.08
 -10   8  -6    0.19    0.06
 -12  -8  -6    0.04    0.05
 -12  -8  -6   -0.05    0.06
 -12  -8  -6   -0.03    0.05
  12   8   6   -0.03    0.05
 -14  -8  -6   -0.01    0.04
 -14  -8  -6   -0.02    0.04
 -14  -8  -6    0.00    0.06
 -14  -8  -6   -0.02    0.06
  14   8   6    0.05    0.05
 -16  -8  -6    0.40    0.06
 -16  -8  -6    0.35    0.09
 -16  -8  -6    0.34    0.07
 -18  -8  -6    0.02    0.05
 -18  -8  -6    0.05    0.05
 -18  -8  -6    0.05    0.03
 -20  -8  -6    0.03    0.03
 -20  -8  -6   -0.03    0.04
 -20  -8  -6   -0.01    0.05
 -21  -9   6    0.21    0.05
 -21  -9   6    0.30    0.05
  21   9  -6    0.26    0.05
 -21   9   6    0.19    0.04
 -19  -9   6    0.14    0.05
 -19  -9   6    0.16    0.05
 -19  -9   6    0.21    0.07
  19   9  -6    0.17    0.05
 -19   9   6    0.15    0.05
 -17  -9   6    0.19    0.06
 -17  -9   6    0.22    0.07
 -17  -9   6    0.18    0.06
  17   9  -6    0.18    0.05
 -17   9   6    0.24    0.06
 -15  -9   6   -0.02    0.05
 -15  -9   6   -0.01    0.05
 -15   9   6    0.06    0.05
  15   9  -6    0.04    0.04
 -13  -9   6    0.30    0.08
  13   9  -6    0.24    0.06
 -13   9   6    0.27    0.05
  13   9  -6    0.09    0.08
 -13   9   6    0.25    0.07
 -11  -9   6    0.04    0.06
  11   9  -6    0.11    0.09
 -11   9   6    0.09    0.06
 -11   9   6    0.16    0.05
  11   9  -6    0.18    0.06
  -9  -9   6    0.03    0.06
  -9   9   6    0.06    0.06
  -9   9   6    0.13    0.06
  -7  -9   6    0.02    0.06
  -7   9   6    0.06    0.06
  -7   9   6    0.14    0.07
   7   9  -6    0.07    0.08
  -5  -9   6    0.14    0.07
  -5   9   6    0.10    0.07
  -5   9   6    0.08    0.07
   5   9  -6    0.16    0.08
  -3  -9   6    0.02    0.06
  -3   9   6    0.00    0.06
   3   9  -6    0.08    0.07
  -1  -9   6    0.00    0.06
   1   9  -6    0.02    0.05
  -1   9   6   -0.05    0.05
   1  -9   6    0.03    0.06
   1   9   6    0.04    0.06
  -1   9  -6    0.00    0.07
  -1   9  -6    0.08    0.05
   3  -9   6    0.14    0.07
  -3  -9  -6    0.21    0.08
   3   9   6    0.14    0.07
  -3   9  -6    0.10    0.07
   5  -9   6    0.12    0.07
  -5  -9  -6    0.19    0.08
  -5   9  -6    0.14    0.07
   5   9   6    0.19    0.07
  -7  -9  -6    0.04    0.06
  -7  -9  -6   -0.02    0.06
   7   9   6    0.08    0.05
  -7   9  -6    0.06    0.05
  -9  -9  -6    0.24    0.08
  -9  -9  -6    0.26    0.07
   9   9   6    0.26    0.07
 -11  -9  -6    0.14    0.05
 -11  -9  -6    0.16    0.07
  11   9   6    0.11    0.05
 -13  -9  -6    0.13    0.06
 -13  -9  -6    0.04    0.04
  13   9   6    0.10    0.05
 -15  -9  -6    0.08    0.05
 -16 -10   6   -0.05    0.04
 -16  10   6   -0.03    0.03
 -14 -10   6   -0.01    0.04
 -14  10   6    0.02    0.03
 -12 -10   6    0.05    0.05
  12  10  -6    0.07    0.06
 -12  10   6    0.12    0.05
 -10 -10   6    0.07    0.05
 -10  10   6    0.07    0.03
  10  10  -6    0.03    0.06
 -10  10   6    0.09    0.05
  -8 -10   6    0.01    0.05
  -8  10   6   -0.01    0.04
   8  10  -6    0.04    0.05
  -8  10   6   -0.05    0.04
  -6 -10   6    0.06    0.05
  -6  10   6    0.05    0.05
   6  10  -6    0.02    0.05
  -6  10   6    0.09    0.05
  -4 -10   6    0.13    0.06
  -4  10   6    0.13    0.06
  -4  10   6    0.17    0.06
   4  10  -6    0.10    0.05
  -2 -10   6   -0.04    0.05
  -2  10   6    0.08    0.06
   2  10  -6    0.13    0.07
  -2  10   6    0.11    0.05
   2  10  -6   -0.04    0.03
   0 -10   6   -0.02    0.05
   0  10   6    0.05    0.05
   0  10   6    0.03    0.06
   0  10  -6    0.10    0.06
   2 -10   6    0.05    0.05
   2  10   6    0.04    0.05
  -2  10  -6   -0.01    0.05
  -4 -10  -6    0.03    0.06
  -4 -10  -6    0.04    0.06
  -4  10  -6    0.12    0.05
   4  10   6    0.10    0.05
  -6 -10  -6    0.05    0.05
  -6 -10  -6    0.02    0.05
   6  10   6    0.00    0.04
  -8 -10  -6    0.16    0.05
  -8 -10  -6    0.07    0.05
   8  10   6    0.09    0.04
 -10 -10  -6    0.07    0.05
 -10 -10  -6    0.06    0.04
 -38   0   7    0.02    0.04
 -38   0   7    0.00    0.02
 -36   0   7    0.06    0.05
 -36   0   7   -0.01    0.05
 -36   0   7    0.05    0.03
 -34   0   7    0.07    0.07
 -34   0   7    0.06    0.05
 -34   0   7    0.11    0.04
 -32   0   7   -0.03    0.06
 -32   0   7   -0.04    0.05
 -32   0   7   -0.02    0.04
 -30   0   7    0.04    0.07
 -30   0   7   -0.05    0.04
 -30   0   7    0.07    0.07
 -28   0   7    0.04    0.05
 -28   0   7    0.15    0.07
 -28   0   7    0.03    0.07
 -26   0   7    0.03    0.06
 -26   0   7   -0.01    0.07
 -26   0   7   -0.03    0.04
 -26   0   7    0.00    0.07
 -24   0   7    1.89    0.20
 -24   0   7    1.94    0.20
 -22   0   7    2.75    0.20
 -22   0   7    2.20    0.21
 -20   0   7    0.60    0.10
 -20   0   7    0.51    0.09
 -20   0   7    0.58    0.09
 -18   0   7    0.02    0.05
 -18   0   7    0.04    0.05
 -18   0   7    0.01    0.04
 -16   0   7    2.23    0.16
 -16   0   7    2.72    0.18
 -16   0   7    2.66    0.16
 -14   0   7    6.80    0.34
 -14   0   7    6.41    0.32
 -14   0   7    6.74    0.35
 -12   0   7    1.19    0.11
 -12   0   7    1.07    0.09
  12   0  -7    1.18    0.11
 -12   0   7    1.17    0.10
 -10   0   7    2.15    0.13
 -10   0   7    2.21    0.13
  10   0  -7    2.29    0.15
 -10   0   7    2.22    0.14
   8   0  -7   -0.02    0.03
  -8   0   7    0.03    0.02
  -8   0   7   -0.01    0.02
  -8   0   7    0.02    0.03
  -8   0   7    0.00    0.02
  -6   0   7    3.25    0.17
   6   0  -7    3.60    0.19
  -6   0   7    3.64    0.17
  -6   0   7    3.16    0.17
  -2   0   7    0.07    0.02
  -2   0   7    0.01    0.02
  -2   0   7   -0.01    0.01
   0   0   7    3.95    0.20
   0   0   7    4.25    0.20
   2   0   7    6.63    0.30
   2   0   7    6.76    0.31
   4   0   7    0.03    0.03
   4   0   7    0.04    0.03
   6   0   7    3.99    0.21
   6   0   7    3.87    0.20
   8   0   7   19.80    0.86
   8   0   7   20.81    0.89
  10   0   7    1.00    0.10
  10   0   7    0.82    0.09
  12   0   7    0.72    0.09
  12   0   7    0.78    0.09
 -12   0  -7    0.75    0.12
  14   0   7    0.09    0.06
  14   0   7    0.11    0.05
 -37  -1   7    0.57    0.06
 -37  -1   7    0.56    0.07
 -37  -1   7    0.90    0.10
 -37   1   7    0.67    0.06
 -37   1   7    0.56    0.08
 -35  -1   7    0.81    0.10
 -35  -1   7    0.59    0.07
 -35  -1   7    0.92    0.12
 -35   1   7    0.62    0.10
 -35   1   7    0.72    0.08
 -33  -1   7    1.63    0.17
 -33  -1   7    1.61    0.16
 -33  -1   7    1.81    0.14
 -33   1   7    1.57    0.16
 -33   1   7    1.89    0.15
 -31  -1   7    2.83    0.23
 -31  -1   7    2.39    0.16
 -31  -1   7    2.82    0.23
 -31   1   7    2.56    0.23
 -31   1   7    2.34    0.22
 -31   1   7    2.58    0.17
 -29  -1   7    0.38    0.09
 -29  -1   7    0.16    0.06
 -29  -1   7    0.49    0.11
 -29   1   7    0.42    0.11
 -29   1   7    0.38    0.08
 -29   1   7    0.28    0.09
 -27  -1   7   26.98    1.23
 -27  -1   7   26.39    1.04
 -27  -1   7   25.77    1.19
 -27  -1   7   26.03    1.09
 -27   1   7   26.44    1.20
 -27   1   7   26.26    1.10
 -27   1   7   26.23    1.23
 -25  -1   7    8.34    0.44
 -25  -1   7    8.31    0.46
 -25  -1   7    8.30    0.39
 -25  -1   7   10.05    0.49
 -25  -1   7    8.20    0.37
 -25   1   7    8.52    0.45
 -25   1   7    8.15    0.36
 -25   1   7    7.88    0.40
 -25   1   7    8.21    0.46
 -23  -1   7   15.50    0.74
 -23  -1   7   13.91    0.74
 -23   1   7   15.13    0.75
 -21  -1   7    8.22    0.44
 -21  -1   7    7.99    0.42
 -21   1   7    7.85    0.44
 -19  -1   7   14.20    0.66
 -19  -1   7   12.67    0.63
 -19  -1   7   13.61    0.68
 -19   1   7   14.56    0.65
 -19   1   7   13.62    0.68
 -17  -1   7    3.90    0.24
 -17  -1   7    4.22    0.26
 -17  -1   7    4.21    0.25
 -17   1   7    4.43    0.24
 -17   1   7    4.18    0.23
 -17   1   7    4.28    0.25
 -15  -1   7    2.55    0.18
 -15  -1   7    2.72    0.17
 -15  -1   7    2.81    0.18
 -15   1   7    2.27    0.16
 -15   1   7    2.67    0.18
 -15   1   7    3.27    0.17
 -13  -1   7   17.48    0.77
 -13  -1   7   17.44    0.74
 -13  -1   7   17.65    0.80
 -13   1   7   17.53    0.79
 -13   1   7   16.78    0.73
 -13   1   7   16.04    0.76
 -11  -1   7   72.64    3.02
 -11  -1   7   67.98    2.92
  11  -1  -7   74.40    3.15
 -11  -1   7   71.52    3.12
 -11  -1   7   63.43    3.11
 -11   1   7   72.59    2.91
  11   1  -7   74.22    3.16
 -11   1   7   75.49    3.12
 -11   1   7   73.09    3.02
  -9  -1   7   12.13    0.55
  -9  -1   7   12.38    0.57
  -9  -1   7   12.78    0.57
  -9  -1   7   12.94    0.59
   9  -1  -7   13.04    0.60
  -9   1   7   11.73    0.58
  -9   1   7   13.28    0.56
  -9   1   7   12.90    0.54
   9   1  -7   13.17    0.61
  -7  -1   7   15.24    0.71
   7  -1  -7   16.58    0.73
  -7  -1   7   16.41    0.69
  -7  -1   7   16.56    0.67
  -7  -1   7   15.59    0.71
  -7   1   7   15.95    0.69
   7   1  -7   15.94    0.73
  -7   1   7   14.29    0.70
  -7   1   7   16.44    0.66
  -7   1   7   15.48    0.71
  -5  -1   7   35.95    1.46
  -5  -1   7   36.41    1.56
  -5  -1   7   36.50    1.51
   5  -1  -7   38.07    1.58
  -5  -1   7   33.95    1.55
  -5   1   7   33.41    1.54
  -5   1   7   35.49    1.45
  -5   1   7   35.56    1.51
  -3  -1   7   12.18    0.56
  -3  -1   7   12.72    0.57
  -3  -1   7   12.63    0.55
  -3  -1   7   12.81    0.53
  -3   1   7   12.19    0.55
  -3   1   7   12.63    0.53
  -1  -1   7   24.84    1.10
  -1  -1   7   24.62    1.08
  -1  -1   7   24.77    1.02
   1  -1  -7   23.82    1.10
  -1  -1   7   25.23    1.06
  -1   1   7   25.55    1.03
  -1   1   7   25.37    1.06
   1  -1   7    4.28    0.19
   1  -1   7    3.97    0.21
   1  -1   7    3.78    0.19
   1   1   7    4.19    0.20
   1   1   7    4.07    0.20
   3  -1   7   22.96    1.06
   3  -1   7   23.63    1.01
   3  -1   7   23.92    0.98
   3   1   7   23.70    1.02
   3   1   7   23.76    0.99
   5  -1   7    6.67    0.33
   5  -1   7    6.62    0.30
   5  -1   7    6.61    0.31
   5   1   7    6.97    0.32
   5   1   7    6.18    0.31
   7  -1   7   10.35    0.48
   7  -1   7   10.86    0.51
   7  -1   7   10.72    0.46
   7   1   7   10.24    0.48
   7   1   7   10.95    0.49
   9  -1   7    7.33    0.34
   9  -1   7    7.62    0.35
   9  -1   7    7.28    0.38
   9   1   7    7.62    0.37
  11  -1   7    2.27    0.14
  11  -1   7    1.95    0.15
  11   1   7    2.30    0.15
 -13  -1  -7   11.81    0.69
  13  -1   7   12.22    0.59
  13   1   7   11.79    0.57
  15  -1   7    2.15    0.18
 -15  -1  -7    1.83    0.21
  15   1   7    2.05    0.18
 -17  -1  -7    5.91    0.40
  17   1   7    5.46    0.32
 -19  -1  -7    2.63    0.21
 -38  -2   7    0.01    0.03
 -38  -2   7    0.04    0.02
 -38   2   7    0.04    0.02
 -36  -2   7    0.04    0.03
 -36  -2   7    0.14    0.05
 -36  -2   7    0.03    0.04
 -36   2   7    0.00    0.03
 -34  -2   7   -0.06    0.05
 -34  -2   7   -0.02    0.04
 -34  -2   7   -0.03    0.03
 -34   2   7    0.02    0.04
 -34   2   7   -0.03    0.05
 -32  -2   7    0.27    0.08
 -32  -2   7    0.10    0.05
 -32  -2   7    0.11    0.06
 -32   2   7    0.27    0.06
 -32   2   7    0.14    0.07
 -30  -2   7    0.19    0.05
 -30  -2   7    0.15    0.07
 -30  -2   7    0.16    0.07
 -30   2   7    0.25    0.09
 -30   2   7    0.11    0.06
 -28  -2   7    0.26    0.08
 -28  -2   7    0.37    0.10
 -28  -2   7    0.18    0.06
 -28   2   7    0.22    0.09
 -28   2   7    0.26    0.07
 -26  -2   7    3.84    0.21
 -26  -2   7    3.71    0.26
 -26  -2   7    3.92    0.25
 -26  -2   7    3.97    0.20
 -26   2   7    3.96    0.19
 -26   2   7    3.85    0.23
 -26   2   7    3.45    0.26
 -24  -2   7    2.07    0.15
 -24  -2   7    1.97    0.19
 -24  -2   7    2.00    0.15
 -24  -2   7    2.38    0.22
 -24  -2   7    2.06    0.19
 -24   2   7    1.92    0.13
 -24   2   7    2.14    0.18
 -22  -2   7    0.66    0.11
 -22  -2   7    0.57    0.12
 -22   2   7    0.66    0.11
 -20  -2   7    8.31    0.44
 -20  -2   7    7.62    0.44
 -20  -2   7    7.82    0.42
 -20   2   7    8.38    0.44
 -18  -2   7    1.25    0.14
 -18  -2   7    1.22    0.13
 -18  -2   7    1.18    0.13
 -18   2   7    1.32    0.14
 -16  -2   7    1.23    0.12
 -16  -2   7    1.53    0.14
 -16  -2   7    1.15    0.13
 -16   2   7    1.02    0.12
 -14  -2   7    6.59    0.35
 -14  -2   7    6.31    0.33
 -14  -2   7    6.10    0.33
 -14  -2   7    6.20    0.32
 -14   2   7    6.57    0.34
 -14   2   7    6.94    0.32
 -12  -2   7    3.56    0.20
 -12  -2   7    3.29    0.20
 -12  -2   7    4.03    0.22
 -12  -2   7    3.63    0.20
 -12   2   7    3.40    0.19
 -12   2   7    3.31    0.18
 -12   2   7    3.86    0.21
 -10  -2   7    4.78    0.26
  10  -2  -7    4.92    0.26
 -10  -2   7    4.83    0.25
 -10  -2   7    4.50    0.24
 -10  -2   7    5.01    0.25
 -10   2   7    4.84    0.23
 -10   2   7    4.84    0.24
 -10   2   7    4.78    0.25
  -8  -2   7   16.91    0.79
   8  -2  -7   17.40    0.80
  -8  -2   7   17.29    0.80
  -8  -2   7   17.05    0.75
  -8  -2   7   17.53    0.77
   8  -2  -7   18.06    0.81
  -8   2   7   18.10    0.73
  -8   2   7   18.15    0.76
  -6  -2   7    0.16    0.04
  -6  -2   7    0.12    0.04
  -6  -2   7    0.12    0.04
  -6  -2   7    0.14    0.04
   6  -2  -7    0.11    0.04
  -6   2   7    0.11    0.03
  -6   2   7    0.14    0.03
  -4  -2   7    1.88    0.11
  -4  -2   7    1.75    0.11
  -4  -2   7    1.86    0.11
  -4  -2   7    1.78    0.11
   4  -2  -7    1.68    0.12
  -4   2   7    1.92    0.10
  -4   2   7    1.82    0.11
  -2  -2   7    4.61    0.23
  -2  -2   7    4.28    0.23
   2  -2  -7    4.53    0.23
  -2  -2   7    4.40    0.21
  -2  -2   7    4.41    0.21
  -2   2   7    4.78    0.22
  -2   2   7    4.40    0.22
   0  -2  -7    0.85    0.07
   0  -2   7    0.84    0.07
   0  -2   7    0.84    0.07
   0  -2   7    0.87    0.07
   0  -2   7    0.91    0.08
   0   2   7    0.93    0.08
   0   2   7    0.76    0.07
   2  -2   7    6.23    0.28
   2  -2   7    6.64    0.32
   2  -2   7    6.48    0.29
   2  -2   7    6.33    0.30
   2   2   7    6.26    0.31
   2   2   7    5.92    0.29
   4  -2   7    3.87    0.21
   4  -2   7    3.75    0.18
   4  -2   7    3.68    0.18
   4   2   7    3.83    0.20
   4   2   7    3.35    0.19
   6  -2   7    3.05    0.16
   6  -2   7    3.33    0.19
   6   2   7    3.31    0.19
   8  -2   7    2.30    0.16
   8   2   7    2.78    0.17
  10  -2   7    2.35    0.16
  10   2   7    2.42    0.17
 -12  -2  -7    0.26    0.10
  12  -2   7    0.58    0.08
  12   2   7    0.38    0.08
 -14  -2  -7    2.08    0.23
  14   2   7    1.67    0.16
 -16  -2  -7    1.98    0.18
 -16  -2  -7    2.48    0.26
  16   2   7    2.70    0.19
 -18  -2  -7    0.69    0.13
 -18  -2  -7    0.51    0.09
 -18  -2  -7    0.75    0.16
 -18  -2  -7    0.64    0.11
 -18  -2  -7    0.57    0.09
 -20  -2  -7    0.89    0.11
 -20  -2  -7    1.18    0.19
 -20  -2  -7    0.94    0.13
 -20  -2  -7    0.99    0.15
 -20  -2  -7    1.22    0.12
 -22  -2  -7    0.40    0.08
 -22  -2  -7    0.40    0.13
 -22  -2  -7    0.44    0.10
 -24  -2  -7    0.06    0.05
 -24  -2  -7    0.16    0.07
 -37  -3   7    0.22    0.03
 -37  -3   7    0.26    0.05
 -37   3   7    0.28    0.04
 -35  -3   7    0.89    0.10
 -35  -3   7    1.12    0.09
 -35  -3   7    1.02    0.10
 -35   3   7    0.97    0.09
 -33  -3   7    0.31    0.08
 -33  -3   7    0.38    0.07
 -33  -3   7    0.40    0.06
 -33   3   7    0.47    0.07
 -31  -3   7    0.79    0.11
 -31  -3   7    0.76    0.09
 -31  -3   7    0.98    0.13
 -31   3   7    0.95    0.11
 -29  -3   7    0.92    0.13
 -29  -3   7    1.11    0.11
 -29  -3   7    1.16    0.14
 -29   3   7    1.04    0.14
 -29   3   7    0.93    0.12
 -27  -3   7    4.52    0.27
 -27  -3   7    4.21    0.28
 -27  -3   7    4.39    0.23
 -27  -3   7    4.61    0.22
 -27   3   7    4.22    0.25
 -27   3   7    4.40    0.29
 -25  -3   7    1.68    0.18
 -25  -3   7    1.73    0.14
 -25  -3   7    2.10    0.19
 -25  -3   7    1.71    0.13
 -25   3   7    1.77    0.17
 -25   3   7    2.01    0.20
 -23  -3   7    6.39    0.32
 -23  -3   7    6.68    0.38
 -23  -3   7    7.48    0.37
 -23  -3   7    6.93    0.32
 -23   3   7    6.06    0.34
  21  -3  -7    2.89    0.26
 -21  -3   7    2.89    0.25
 -21  -3   7    2.18    0.20
 -21  -3   7    2.16    0.21
 -19  -3   7    0.47    0.10
 -19  -3   7    0.36    0.09
  19  -3  -7    0.38    0.10
 -19  -3   7    0.50    0.10
 -17  -3   7    0.52    0.09
 -17  -3   7    0.50    0.09
 -17  -3   7    0.49    0.09
  17  -3  -7    0.64    0.11
 -15  -3   7    2.61    0.19
 -15  -3   7    2.67    0.20
 -15  -3   7    2.65    0.18
 -15  -3   7    3.26    0.20
  15  -3  -7    3.09    0.21
  13  -3  -7    1.04    0.12
 -13  -3   7    0.80    0.10
 -13  -3   7    1.06    0.11
 -13  -3   7    0.89    0.11
 -13  -3   7    1.11    0.11
  11  -3  -7    6.24    0.32
  11  -3  -7    6.04    0.32
 -11  -3   7    5.38    0.29
 -11  -3   7    5.61    0.32
 -11  -3   7    6.21    0.31
 -11  -3   7    6.19    0.31
  -9  -3   7   14.41    0.66
   9  -3  -7   14.13    0.68
  -9  -3   7   15.53    0.69
   9  -3  -7   14.83    0.69
  -9  -3   7   14.31    0.68
  -9  -3   7   14.59    0.64
   7  -3  -7    1.89    0.13
  -7  -3   7    1.90    0.12
  -7  -3   7    1.93    0.12
  -7  -3   7    1.77    0.13
  -7  -3   7    1.97    0.13
  -7   3   7    1.96    0.11
  -7   3   7    1.95    0.11
  -5  -3   7    1.72    0.11
  -5  -3   7    1.60    0.12
  -5  -3   7    1.53    0.11
   5  -3  -7    1.46    0.12
  -5  -3   7    1.55    0.11
  -5   3   7    1.64    0.10
  -5   3   7    1.52    0.09
  -3  -3   7    4.84    0.24
   3  -3  -7    4.89    0.26
  -3  -3   7    4.73    0.25
  -3  -3   7    4.71    0.25
  -3  -3   7    4.72    0.23
  -3   3   7    5.23    0.23
  -3   3   7    4.64    0.23
  -1  -3   7   12.99    0.55
  -1  -3   7   13.23    0.60
  -1  -3   7   12.78    0.60
  -1  -3   7   12.42    0.57
   1  -3  -7   13.15    0.60
  -1   3   7   13.11    0.58
  -1   3   7   12.83    0.56
  -1  -3  -7    7.98    0.36
   1  -3   7    7.70    0.38
   1  -3   7    7.84    0.38
   1   3   7    7.54    0.36
   1   3   7    7.93    0.37
   3  -3   7   10.37    0.50
   3  -3   7   10.24    0.49
   3   3   7   10.39    0.48
   3   3   7   10.65    0.47
   5  -3   7    4.49    0.25
   5  -3   7    4.75    0.25
   5   3   7    4.41    0.24
   7  -3   7    1.50    0.13
   7   3   7    1.84    0.15
   9  -3   7    0.22    0.05
   9   3   7    0.11    0.05
  11  -3   7    0.74    0.09
 -11  -3  -7    0.72    0.10
  11   3   7    0.71    0.10
 -13  -3  -7    2.75    0.28
  13   3   7    3.04    0.21
 -15  -3  -7    2.64    0.27
 -15  -3  -7    2.62    0.19
 -17  -3  -7    0.23    0.10
 -17  -3  -7    0.36    0.13
 -17  -3  -7    0.19    0.08
 -17  -3  -7    0.36    0.08
 -17  -3  -7    0.26    0.07
 -19  -3  -7    1.19    0.13
 -19  -3  -7    1.03    0.12
 -19  -3  -7    1.13    0.19
 -19  -3  -7    0.93    0.15
 -19  -3  -7    0.92    0.13
 -21  -3  -7    0.41    0.12
 -21  -3  -7    0.23    0.07
 -21  -3  -7    0.23    0.07
 -21  -3  -7    0.40    0.09
 -21  -3  -7    0.39    0.11
 -23  -3  -7    0.24    0.08
 -23  -3  -7    0.16    0.06
 -23  -3  -7    0.18    0.06
 -25  -3  -7    0.04    0.04
 -25  -3  -7   -0.01    0.05
 -25  -3  -7    0.09    0.05
 -27  -3  -7    0.01    0.03
 -27  -3  -7    0.00    0.04
 -27  -3  -7    0.00    0.05
 -36  -4   7    0.29    0.05
 -36  -4   7    0.26    0.04
 -36   4   7    0.27    0.04
 -34  -4   7    0.13    0.05
 -34  -4   7    0.11    0.03
 -34  -4   7    0.08    0.04
 -34   4   7    0.09    0.04
 -32  -4   7    0.47    0.06
 -32  -4   7    0.39    0.07
 -32  -4   7    0.37    0.08
 -32   4   7    0.30    0.06
 -30  -4   7    0.75    0.11
 -30  -4   7    0.62    0.08
 -30  -4   7    0.93    0.11
 -30   4   7    0.83    0.11
 -28  -4   7    0.67    0.07
 -28  -4   7    0.61    0.10
 -28  -4   7    0.29    0.08
 -28  -4   7    0.46    0.07
 -28  -4   7    0.79    0.13
 -28   4   7    0.51    0.09
 -26  -4   7    0.77    0.09
 -26  -4   7    0.90    0.10
 -26  -4   7    0.65    0.10
 -26  -4   7    0.80    0.13
 -26  -4   7    0.90    0.14
 -26   4   7    1.06    0.13
 -26   4   7    0.82    0.07
 -24  -4   7    0.98    0.15
 -24  -4   7    1.32    0.15
 -24  -4   7    1.22    0.11
 -24  -4   7    0.97    0.13
 -24  -4   7    1.14    0.11
 -24   4   7    1.43    0.15
 -22  -4   7    0.42    0.09
 -22  -4   7    0.33    0.07
 -22  -4   7    0.58    0.08
 -22  -4   7    0.45    0.10
 -22  -4   7    0.51    0.11
 -22   4   7    0.30    0.08
 -20  -4   7    2.92    0.25
 -20  -4   7    2.43    0.21
  20  -4  -7    3.46    0.28
  18  -4  -7    1.09    0.15
 -18  -4   7    0.99    0.14
 -18  -4   7    1.07    0.14
 -16  -4   7    1.72    0.17
  16  -4  -7    1.67    0.17
 -16  -4   7    1.71    0.17
 -16  -4   7    1.76    0.18
 -16  -4   7    1.56    0.17
 -14  -4   7    9.89    0.51
 -14  -4   7    9.61    0.50
 -14  -4   7    8.73    0.48
 -14  -4   7    9.46    0.47
  14  -4  -7   10.79    0.52
 -12  -4   7    3.17    0.20
 -12  -4   7    3.11    0.21
 -12  -4   7    3.09    0.19
 -12  -4   7    2.76    0.20
  12  -4  -7    3.32    0.21
 -10  -4   7    0.12    0.05
 -10  -4   7    0.14    0.05
  10  -4  -7    0.15    0.06
  10  -4  -7    0.35    0.07
 -10  -4   7    0.15    0.05
 -10  -4   7    0.16    0.05
  -8  -4   7    3.32    0.19
   8  -4  -7    3.50    0.21
  -8  -4   7    3.16    0.20
  -8  -4   7    2.93    0.20
  -8  -4   7    3.42    0.19
  -6  -4   7   20.61    0.95
  -6  -4   7   19.96    0.88
  -6  -4   7   20.22    0.95
   6  -4  -7   22.06    0.96
   4  -4  -7    1.38    0.12
  -4  -4   7    1.23    0.12
  -4  -4   7    1.67    0.13
   2  -4  -7    0.94    0.10
  -2  -4   7    1.32    0.12
  -2  -4   7    0.82    0.09
  -2   4   7    1.06    0.09
  -2   4   7    1.06    0.09
   0  -4   7    3.89    0.23
   0  -4  -7    3.95    0.22
   0  -4   7    3.85    0.23
   0   4   7    4.27    0.22
   0   4   7    4.53    0.22
   2  -4   7    2.38    0.17
   2  -4   7    2.72    0.17
   2   4   7    2.67    0.16
   2   4   7    2.94    0.16
   4  -4   7    2.53    0.17
   4  -4   7    2.77    0.17
   4   4   7    2.45    0.16
   4   4   7    2.74    0.16
   6  -4   7    1.43    0.14
   6  -4   7    1.23    0.12
   6   4   7    1.81    0.15
   8  -4   7    2.17    0.16
   8   4   7    2.46    0.17
 -10  -4  -7    0.78    0.15
  10  -4   7    0.76    0.10
  10   4   7    1.04    0.12
 -12  -4  -7    2.20    0.25
 -12  -4  -7    2.09    0.18
 -14  -4  -7    2.35    0.26
 -14  -4  -7    2.28    0.16
 -14  -4  -7    1.89    0.19
 -14  -4  -7    2.24    0.13
 -14  -4  -7    1.98    0.18
 -14  -4  -7    2.24    0.23
 -16  -4  -7    0.22    0.07
 -16  -4  -7    0.24    0.10
 -16  -4  -7    0.29    0.09
 -16  -4  -7    0.08    0.10
 -16  -4  -7    0.28    0.08
 -18  -4  -7    0.21    0.07
 -18  -4  -7    0.09    0.11
 -18  -4  -7    0.22    0.08
 -18  -4  -7    0.19    0.07
 -18  -4  -7    0.27    0.10
 -20  -4  -7    0.48    0.10
 -20  -4  -7    0.20    0.07
 -20  -4  -7    0.38    0.11
 -20  -4  -7    0.32    0.07
 -22  -4  -7    0.22    0.09
 -22  -4  -7    0.11    0.05
 -22  -4  -7    0.20    0.08
 -22  -4  -7    0.23    0.07
 -24  -4  -7    0.45    0.07
 -24  -4  -7    0.27    0.06
 -24  -4  -7    0.13    0.04
 -26  -4  -7    0.32    0.05
 -26  -4  -7    0.32    0.06
 -28  -4  -7    0.11    0.05
 -33  -5   7    0.27    0.04
 -33  -5   7    0.30    0.06
 -33  -5   7    0.31    0.05
 -33   5   7    0.20    0.05
 -31  -5   7   -0.02    0.06
 -31  -5   7   -0.01    0.03
 -31  -5   7    0.00    0.04
 -31  -5   7   -0.04    0.04
  31   5  -7   -0.03    0.06
 -31   5   7    0.04    0.04
 -29  -5   7    0.31    0.09
 -29  -5   7    0.23    0.07
 -29  -5   7    0.21    0.06
 -29  -5   7    0.11    0.04
 -29   5   7    0.23    0.07
  29   5  -7    0.21    0.09
 -27  -5   7    0.77    0.11
 -27  -5   7    0.72    0.12
 -27  -5   7    0.83    0.08
 -27  -5   7    0.96    0.09
 -27  -5   7    0.61    0.09
 -27   5   7    0.67    0.10
  27   5  -7    0.70    0.13
 -25  -5   7    0.64    0.11
 -25  -5   7    0.56    0.08
 -25  -5   7    1.00    0.10
 -25  -5   7    0.87    0.13
 -25  -5   7    0.85    0.11
 -25   5   7    0.64    0.11
  25   5  -7    0.83    0.15
 -23  -5   7    0.67    0.09
 -23  -5   7    0.92    0.14
 -23  -5   7    1.21    0.11
 -23  -5   7    0.99    0.13
 -23   5   7    1.32    0.14
  23   5  -7    1.22    0.18
 -21  -5   7    1.44    0.12
 -21  -5   7    1.21    0.16
 -21  -5   7    1.37    0.13
  21   5  -7    1.70    0.21
 -21   5   7    1.64    0.16
 -19  -5   7    0.10    0.06
 -19  -5   7    0.05    0.05
 -19  -5   7    0.17    0.08
  19   5  -7    0.15    0.09
 -19   5   7    0.16    0.05
 -19   5   7    0.11    0.07
 -17  -5   7    0.39    0.11
  17  -5  -7    0.26    0.09
 -17  -5   7    0.14    0.07
 -15  -5   7    1.58    0.17
  15  -5  -7    1.67    0.17
 -15  -5   7    1.23    0.15
 -15  -5   7    1.39    0.16
 -13  -5   7    1.06    0.13
 -13  -5   7    0.86    0.12
 -13  -5   7    0.97    0.13
 -13  -5   7    0.84    0.11
  13  -5  -7    0.95    0.12
 -11  -5   7    1.11    0.14
 -11  -5   7    1.63    0.15
 -11  -5   7    1.36    0.15
  -9  -5   7    2.40    0.19
  -9  -5   7    1.85    0.17
   9  -5  -7    2.14    0.18
   7  -5  -7    1.13    0.13
  -7  -5   7    1.45    0.14
  -7  -5   7    1.25    0.13
   5  -5  -7    1.30    0.13
  -5  -5   7    1.18    0.12
  -5  -5   7    0.96    0.12
  -3  -5   7    3.00    0.19
   3  -5  -7    2.90    0.19
  -3  -5   7    2.74    0.19
  -1  -5   7    0.39    0.07
   1  -5  -7    0.39    0.07
  -1  -5   7    0.40    0.08
   1  -5   7    0.49    0.08
   1  -5   7    0.44    0.08
  -1  -5  -7    0.46    0.06
   3  -5   7    1.64    0.16
   3  -5   7    1.60    0.15
   3   5   7    1.73    0.14
   5  -5   7    0.24    0.07
   5  -5   7    0.27    0.07
   5   5   7    0.29    0.07
   5   5   7    0.26    0.07
   7  -5   7    0.72    0.10
   7   5   7    1.21    0.13
  -9  -5  -7    1.24    0.18
  -9  -5  -7    1.21    0.13
   9   5   7    1.21    0.13
 -11  -5  -7    0.87    0.11
 -11  -5  -7    0.72    0.10
 -11  -5  -7    0.70    0.10
 -11  -5  -7    0.86    0.14
 -11  -5  -7    0.80    0.15
 -11   5  -7    0.69    0.08
 -13  -5  -7    1.74    0.22
 -13  -5  -7    1.74    0.16
 -13  -5  -7    1.65    0.20
 -13  -5  -7    2.09    0.15
 -13  -5  -7    1.90    0.17
 -13  -5  -7    1.75    0.17
 -15  -5  -7    3.27    0.23
 -15  -5  -7    3.45    0.30
 -15  -5  -7    3.53    0.23
 -15  -5  -7    2.92    0.30
 -15  -5  -7    3.47    0.22
 -17  -5  -7    0.11    0.10
 -17  -5  -7    0.16    0.07
 -17  -5  -7    0.19    0.07
 -17  -5  -7    0.05    0.07
 -17  -5  -7    0.06    0.08
 -19  -5  -7    1.54    0.15
 -19  -5  -7    1.72    0.15
 -19  -5  -7    1.67    0.16
 -19  -5  -7    1.63    0.19
 -21  -5  -7    0.66    0.09
 -21  -5  -7    0.72    0.11
 -21  -5  -7    0.81    0.13
 -21  -5  -7    0.67    0.09
 -23  -5  -7    0.07    0.04
 -23  -5  -7    0.02    0.05
 -23  -5  -7    0.13    0.05
 -23  -5  -7    0.23    0.09
 -25  -5  -7    0.10    0.05
 -25  -5  -7    0.04    0.04
 -27  -5  -7    0.04    0.04
 -32  -6   7    0.54    0.07
 -32  -6   7    0.41    0.05
 -32   6   7    0.39    0.05
 -30  -6   7    0.29    0.05
 -30  -6   7    0.38    0.06
 -30  -6   7    0.20    0.06
 -30   6   7    0.27    0.06
 -28  -6   7    0.15    0.07
 -28  -6   7    0.27    0.05
  28   6  -7    0.34    0.10
 -28   6   7    0.24    0.06
 -26  -6   7    0.44    0.06
 -26  -6   7    0.54    0.10
 -26  -6   7    0.42    0.07
 -26   6   7    0.31    0.08
  26   6  -7    0.71    0.13
 -24  -6   7    1.15    0.11
 -24  -6   7    0.94    0.10
 -24  -6   7    1.19    0.14
  24   6  -7    0.83    0.15
 -24   6   7    0.97    0.12
 -22  -6   7    0.89    0.09
 -22  -6   7    0.83    0.10
 -22  -6   7    0.98    0.14
 -22   6   7    0.63    0.11
  22   6  -7    0.70    0.14
 -20  -6   7    0.70    0.10
 -20  -6   7    0.94    0.13
 -20  -6   7    1.03    0.10
  20   6  -7    1.05    0.17
 -20   6   7    1.04    0.13
 -18  -6   7    0.28    0.06
 -18  -6   7    0.13    0.07
 -18  -6   7    0.28    0.09
 -18   6   7    0.26    0.08
  18   6  -7    0.21    0.10
 -18   6   7    0.30    0.06
 -16  -6   7    2.86    0.25
 -16  -6   7    2.63    0.16
 -16  -6   7    2.98    0.23
 -16   6   7    2.64    0.21
 -16   6   7    2.50    0.16
  16   6  -7    2.63    0.28
 -14  -6   7    0.11    0.07
 -14   6   7    0.07    0.06
 -14   6   7    0.19    0.08
  14   6  -7    0.17    0.09
 -12  -6   7    0.13    0.08
 -10  -6   7    0.03    0.06
 -10  -6   7    0.01    0.06
  -8  -6   7    0.15    0.07
  -8  -6   7    0.30    0.08
  -6  -6   7    1.19    0.15
  -6  -6   7    1.25    0.14
   6  -6  -7    1.13    0.14
  -4  -6   7    1.65    0.16
  -4  -6   7    1.17    0.13
   4  -6  -7    0.98    0.12
  -2  -6   7    0.37    0.08
  -2  -6   7    0.29    0.08
   0  -6   7    0.62    0.11
   0  -6  -7    0.61    0.08
   0  -6   7    0.56    0.10
   2  -6   7    1.18    0.13
   2  -6   7    0.87    0.12
   4  -6   7    4.81    0.30
   4  -6   7    4.86    0.29
  -6  -6  -7    0.12    0.10
  -6  -6  -7    0.20    0.08
  -6  -6  -7    0.15    0.06
  -6   6  -7    0.23    0.09
  -8  -6  -7    2.65    0.27
  -8  -6  -7    2.77    0.19
  -8  -6  -7    2.24    0.23
  -8  -6  -7    2.54    0.20
  -8  -6  -7    2.83    0.18
  -8   6  -7    2.56    0.19
 -10  -6  -7    0.28    0.11
 -10  -6  -7    0.53    0.09
 -10  -6  -7    0.37    0.09
 -10  -6  -7    0.34    0.09
 -10  -6  -7    0.43    0.09
 -10  -6  -7    0.28    0.10
 -10   6  -7    0.40    0.08
 -12  -6  -7    0.93    0.13
 -12  -6  -7    0.97    0.16
 -12  -6  -7    0.79    0.10
 -12  -6  -7    0.58    0.12
 -12  -6  -7    0.84    0.11
 -12  -6  -7    0.55    0.09
 -14  -6  -7    2.11    0.19
 -14  -6  -7    1.98    0.22
 -14  -6  -7    2.08    0.14
 -14  -6  -7    1.92    0.23
 -14  -6  -7    1.95    0.17
 -14  -6  -7    2.10    0.17
 -16  -6  -7    0.08    0.07
 -16  -6  -7    0.08    0.05
 -16  -6  -7    0.11    0.08
 -16  -6  -7    0.09    0.05
 -18  -6  -7    0.38    0.09
 -18  -6  -7    0.52    0.08
 -18  -6  -7    0.38    0.08
 -18  -6  -7    0.54    0.12
 -20  -6  -7    0.09    0.05
 -20  -6  -7    0.09    0.06
 -20  -6  -7   -0.02    0.07
 -22  -6  -7    0.01    0.05
 -22  -6  -7   -0.02    0.03
 -22  -6  -7    0.01    0.06
 -24  -6  -7    0.08    0.04
 -24  -6  -7    0.05    0.03
 -24  -6  -7    0.03    0.06
 -29  -7   7    0.17    0.05
 -29  -7   7    0.22    0.04
 -29   7   7    0.19    0.04
 -27  -7   7    0.13    0.06
 -27  -7   7    0.25    0.05
 -27   7   7    0.46    0.07
 -25  -7   7    0.00    0.05
 -25  -7   7    0.04    0.04
 -25  -7   7    0.01    0.04
 -25   7   7   -0.04    0.04
 -23  -7   7    1.11    0.11
 -23  -7   7    1.20    0.10
 -23  -7   7    1.21    0.14
  23   7  -7    0.95    0.16
 -23   7   7    1.14    0.13
 -21  -7   7    1.14    0.12
 -21  -7   7    1.25    0.15
 -21  -7   7    1.59    0.12
 -21   7   7    1.26    0.14
  21   7  -7    1.87    0.22
 -19  -7   7    1.16    0.15
 -19  -7   7    1.52    0.14
 -19  -7   7    1.77    0.13
  19   7  -7    1.46    0.20
 -19   7   7    1.37    0.15
 -17  -7   7    0.05    0.05
 -17  -7   7    0.15    0.08
 -17  -7   7    0.11    0.07
 -17   7   7   -0.02    0.06
 -17   7   7    0.01    0.04
  17   7  -7    0.04    0.08
 -15  -7   7    1.01    0.14
 -15  -7   7    1.16    0.11
 -15  -7   7    1.27    0.16
  15   7  -7    0.73    0.15
 -15   7   7    1.20    0.11
 -15   7   7    1.08    0.13
 -13  -7   7    1.22    0.16
 -13  -7   7    1.53    0.16
 -13   7   7    1.41    0.13
  13   7  -7    1.16    0.19
 -13   7   7    1.32    0.15
 -11  -7   7    0.94    0.13
 -11  -7   7    0.54    0.10
  11   7  -7    0.51    0.14
 -11   7   7    0.66    0.11
 -11   7   7    0.59    0.10
  -9  -7   7    0.10    0.07
  -9  -7   7    0.14    0.08
   9   7  -7    0.14    0.09
  -9   7   7    0.19    0.08
  -9   7   7    0.08    0.07
  -7  -7   7    0.29    0.09
   7   7  -7    0.23    0.11
  -7   7   7    0.29    0.09
  -5  -7   7    0.25    0.09
   5   7  -7    0.30    0.11
   5   7  -7    0.37    0.12
  -5   7   7    0.46    0.09
  -3  -7   7    0.08    0.07
   3   7  -7    0.02    0.08
  -3   7   7    0.10    0.07
   3   7  -7    0.01    0.08
  -1  -7   7    0.15    0.08
   1   7  -7    0.05    0.07
   1   7  -7    0.08    0.09
  -1   7   7    0.02    0.06
   1  -7   7    0.17    0.07
  -1  -7  -7    0.08    0.09
  -1  -7  -7    0.06    0.05
  -1   7  -7    0.02    0.09
   1   7   7    0.16    0.07
  -1   7  -7    0.07    0.07
  -3  -7  -7    0.38    0.11
  -3  -7  -7    0.51    0.08
  -3   7  -7    0.48    0.12
  -3   7  -7    0.35    0.08
   3   7   7    0.56    0.10
  -5  -7  -7    0.20    0.09
  -5  -7  -7    0.10    0.06
  -5  -7  -7    0.00    0.07
  -5   7  -7    0.15    0.04
   5   7   7    0.05    0.06
  -5   7  -7    0.09    0.08
  -7  -7  -7    0.43    0.11
  -7  -7  -7    0.45    0.08
  -7  -7  -7    0.64    0.11
   7   7   7    0.52    0.09
  -7   7  -7    0.60    0.10
  -9  -7  -7    1.37    0.14
  -9  -7  -7    1.22    0.12
  -9  -7  -7    1.56    0.19
  -9   7  -7    1.07    0.12
 -11  -7  -7    1.22    0.13
 -11  -7  -7    1.61    0.19
 -11  -7  -7    1.29    0.13
 -11  -7  -7    1.25    0.14
 -13  -7  -7    0.51    0.10
 -13  -7  -7    0.42    0.08
 -13  -7  -7    0.49    0.08
 -13  -7  -7    0.36    0.10
 -15  -7  -7    0.35    0.08
 -15  -7  -7    0.50    0.08
 -15  -7  -7    0.39    0.11
 -17  -7  -7    0.32    0.10
 -17  -7  -7    0.52    0.07
 -17  -7  -7    0.48    0.09
 -19  -7  -7    0.20    0.07
 -19  -7  -7    0.19    0.06
 -19  -7  -7    0.32    0.06
 -21  -7  -7   -0.02    0.05
 -21  -7  -7    0.02    0.02
 -21  -7  -7    0.02    0.03
 -26  -8   7    0.10    0.04
 -26   8   7    0.07    0.04
  26   8  -7    0.11    0.03
 -24  -8   7    0.07    0.05
 -24  -8   7    0.10    0.04
 -24   8   7    0.14    0.05
  24   8  -7    0.18    0.04
 -22  -8   7    0.11    0.06
 -22  -8   7    0.06    0.04
  22   8  -7    0.08    0.04
 -22   8   7    0.05    0.05
 -20  -8   7    0.02    0.06
 -20  -8   7    0.03    0.07
 -20  -8   7   -0.01    0.05
  20   8  -7    0.01    0.07
  20   8  -7    0.09    0.04
 -20   8   7    0.05    0.05
 -18  -8   7    0.36    0.08
 -18  -8   7    0.36    0.08
 -18  -8   7    0.33    0.09
  18   8  -7    0.30    0.11
  18   8  -7    0.26    0.06
 -18   8   7    0.31    0.07
 -16  -8   7    0.78    0.12
 -16  -8   7    0.94    0.12
 -16   8   7    0.76    0.07
  16   8  -7    0.77    0.09
 -16   8   7    0.89    0.11
  16   8  -7    0.43    0.12
 -14  -8   7    0.14    0.07
 -14  -8   7    0.31    0.09
 -14   8   7    0.13    0.07
 -14   8   7    0.12    0.05
  14   8  -7    0.19    0.09
 -12  -8   7    0.28    0.09
 -12  -8   7    0.27    0.08
 -12   8   7    0.24    0.07
  12   8  -7    0.37    0.12
 -12   8   7    0.17    0.07
 -10  -8   7    0.02    0.07
 -10   8   7    0.13    0.07
 -10   8   7    0.06    0.06
  10   8  -7    0.03    0.08
  -8  -8   7    1.76    0.18
  -8   8   7    1.52    0.16
   8   8  -7    1.10    0.20
  -8   8   7    1.13    0.14
  -6  -8   7    0.21    0.08
   6   8  -7    0.23    0.10
   6   8  -7    0.12    0.10
  -6   8   7    0.41    0.09
  -4  -8   7    0.22    0.08
  -4   8   7    0.30    0.08
   4   8  -7    0.19    0.10
   4   8  -7    0.36    0.10
  -2  -8   7    0.60    0.11
  -2   8   7    0.76    0.11
   2   8  -7    0.53    0.11
   0  -8   7    0.12    0.07
   0   8   7    0.09    0.07
   0   8  -7    0.40    0.11
   0   8  -7    0.27    0.08
   2  -8   7    0.14    0.07
  -2  -8  -7    0.18    0.09
  -2   8  -7    0.06    0.05
  -2   8  -7    0.20    0.09
   2   8   7    0.12    0.07
  -4  -8  -7    1.62    0.14
  -4  -8  -7    1.90    0.18
  -4  -8  -7    1.51    0.18
   4  -8   7    2.33    0.20
   4   8   7    2.01    0.17
  -4   8  -7    2.02    0.18
   6  -8   7    0.15    0.07
  -6  -8  -7    0.18    0.08
  -6  -8  -7    0.14    0.09
  -6  -8  -7    0.25    0.06
   6   8   7    0.13    0.07
  -6   8  -7    0.12    0.07
  -8  -8  -7    0.31    0.08
  -8  -8  -7    0.39    0.11
  -8  -8  -7    0.48    0.08
  -8   8  -7    0.41    0.07
   8   8   7    0.50    0.09
 -10  -8  -7    0.10    0.06
 -10  -8  -7    0.15    0.05
 -10  -8  -7    0.13    0.08
  10   8   7    0.05    0.06
 -12  -8  -7    0.27    0.09
 -12  -8  -7    0.27    0.06
 -12  -8  -7    0.20    0.06
 -14  -8  -7    0.18    0.07
 -14  -8  -7    0.26    0.05
 -16  -8  -7    0.23    0.07
 -16  -8  -7    0.18    0.06
 -16  -8  -7    0.23    0.05
 -18  -8  -7    0.24    0.07
 -18  -8  -7    0.12    0.03
 -18  -8  -7    0.23    0.04
 -21  -9   7    0.13    0.04
 -21  -9   7    0.09    0.04
  21   9  -7    0.19    0.04
 -21   9   7    0.21    0.05
 -19  -9   7    0.16    0.06
 -19  -9   7    0.16    0.05
 -19  -9   7    0.06    0.05
  19   9  -7    0.09    0.04
 -19   9   7    0.16    0.05
 -17  -9   7    0.02    0.05
 -17  -9   7   -0.03    0.05
 -17  -9   7    0.05    0.06
 -17   9   7    0.06    0.05
 -15  -9   7    0.44    0.08
 -15  -9   7    0.38    0.09
  15   9  -7    0.46    0.11
 -15   9   7    0.59    0.09
 -13  -9   7    0.06    0.06
 -13   9   7    0.09    0.05
 -13   9   7    0.12    0.04
  13   9  -7    0.04    0.07
 -11  -9   7    0.26    0.07
 -11   9   7    0.01    0.05
 -11   9   7    0.10    0.05
  11   9  -7    0.13    0.09
  -9  -9   7    0.20    0.07
  -9   9   7    0.17    0.07
   9   9  -7    0.10    0.08
  -9   9   7    0.29    0.07
  -7  -9   7    0.27    0.08
  -7   9   7    0.21    0.07
  -7   9   7    0.39    0.08
   7   9  -7    0.39    0.10
  -5  -9   7    0.11    0.07
  -5   9   7    0.20    0.07
   5   9  -7    0.03    0.07
  -5   9   7    0.06    0.07
  -3  -9   7    0.08    0.06
  -3   9   7    0.05    0.06
   3   9  -7   -0.08    0.05
  -1  -9   7    0.02    0.06
   1   9  -7    0.05    0.08
   1   9  -7    0.01    0.05
  -1   9   7   -0.06    0.05
   1  -9   7    0.04    0.06
  -1   9  -7    0.04    0.04
   1   9   7   -0.07    0.05
  -1   9  -7    0.08    0.07
  -3  -9  -7    0.06    0.07
   3  -9   7    0.03    0.06
   3   9   7   -0.02    0.05
  -3   9  -7   -0.09    0.05
  -5  -9  -7    0.06    0.07
  -5  -9  -7    0.02    0.06
   5  -9   7    0.17    0.06
   5   9   7    0.18    0.06
  -5   9  -7    0.12    0.06
  -7  -9  -7    0.18    0.07
  -7  -9  -7    0.02    0.06
   7   9   7    0.14    0.06
  -9  -9  -7    0.33    0.08
  -9  -9  -7    0.32    0.07
   9   9   7    0.29    0.06
 -11  -9  -7    0.29    0.08
 -11  -9  -7    0.22    0.05
 -13  -9  -7    0.03    0.05
 -15  -9  -7    0.09    0.05
 -16 -10   7    0.03    0.04
 -16  10   7    0.04    0.03
 -14 -10   7    0.04    0.04
 -14  10   7    0.05    0.04
  14  10  -7    0.01    0.05
 -12 -10   7    0.40    0.07
 -12  10   7    0.26    0.06
  12  10  -7    0.58    0.08
 -10 -10   7    0.08    0.05
 -10  10   7    0.13    0.05
  10  10  -7    0.19    0.06
 -10  10   7    0.12    0.03
  -8 -10   7    0.05    0.05
  -8  10   7    0.09    0.04
  -8  10   7   -0.04    0.04
   8  10  -7   -0.05    0.04
  -6 -10   7    0.03    0.05
  -6  10   7    0.14    0.05
   6  10  -7    0.03    0.05
  -6  10   7    0.13    0.05
  -4 -10   7    0.04    0.05
  -4  10   7   -0.06    0.04
   4  10  -7    0.01    0.04
  -4  10   7   -0.09    0.04
  -2 -10   7    0.00    0.04
  -2  10   7    0.12    0.05
   2  10  -7   -0.02    0.05
  -2  10   7    0.03    0.05
   0 -10   7    0.08    0.05
   0  10   7   -0.04    0.04
   0  10  -7    0.01    0.05
  -2 -10  -7    0.32    0.08
   2 -10   7    0.22    0.06
   2  10   7    0.29    0.06
  -2  10  -7    0.41    0.07
  -4 -10  -7    0.28    0.07
   4 -10   7    0.26    0.06
   4  10   7    0.41    0.07
  -6 -10  -7    0.20    0.05
  -6 -10  -7    0.21    0.06
   6  10   7    0.18    0.05
  -8 -10  -7    0.29    0.05
 -38   0   8    0.01    0.02
 -38   0   8   -0.03    0.03
 -36   0   8    0.06    0.06
 -36   0   8    0.02    0.03
 -36   0   8    0.07    0.05
 -34   0   8    0.23    0.07
 -34   0   8    0.24    0.05
 -34   0   8    0.12    0.07
 -32   0   8    1.95    0.15
 -32   0   8    1.87    0.18
 -32   0   8    2.03    0.20
 -30   0   8    0.05    0.06
 -30   0   8    0.10    0.08
 -30   0   8    0.03    0.05
 -28   0   8    1.60    0.10
 -28   0   8    1.72    0.19
 -28   0   8    1.80    0.19
 -28   0   8    1.69    0.15
 -26   0   8   13.89    0.61
 -26   0   8   13.47    0.67
 -26   0   8   13.53    0.69
 -26   0   8   13.78    0.57
 -24   0   8    0.43    0.11
 -24   0   8    0.69    0.12
 -24   0   8    0.48    0.11
 -22   0   8   13.04    0.66
 -22   0   8   14.03    0.69
 -22   0   8   13.47    0.64
 -20   0   8    1.83    0.18
 -20   0   8    1.91    0.17
 -20   0   8    2.26    0.20
 -18   0   8    1.00    0.11
 -18   0   8    1.16    0.13
 -18   0   8    1.24    0.13
 -16   0   8   13.37    0.64
 -16   0   8   14.38    0.66
 -16   0   8   14.97    0.69
 -14   0   8    1.55    0.13
 -14   0   8    1.42    0.13
 -14   0   8    1.40    0.12
 -12   0   8   68.72    2.86
  12   0  -8   65.84    2.98
 -12   0   8   67.29    2.95
 -12   0   8   68.48    2.76
 -10   0   8   60.77    2.76
 -10   0   8   63.85    2.67
  10   0  -8   63.91    2.80
 -10   0   8   64.94    2.58
  -8   0   8    2.32    0.13
  -8   0   8    2.45    0.13
  -8   0   8    2.16    0.12
  -8   0   8    2.17    0.13
   8   0  -8    2.34    0.15
  -6   0   8    0.81    0.07
  -6   0   8    0.69    0.07
  -6   0   8    0.94    0.07
   6   0  -8    0.81    0.09
  -4   0   8    3.30    0.16
  -4   0   8    3.09    0.16
  -4   0   8    3.20    0.17
   4   0  -8    3.14    0.18
  -2   0   8    3.19    0.16
  -2   0   8    2.96    0.17
  -2   0   8    3.12    0.16
   0   0   8    2.12    0.12
   0   0   8    1.89    0.13
   0   0   8    2.03    0.12
   2   0   8   21.58    0.90
   2   0   8   21.41    0.93
   4   0   8  155.06    6.47
   6   0   8    3.71    0.20
   6   0   8    3.83    0.21
   8   0   8    4.14    0.22
   8   0   8    4.20    0.23
  10   0   8    0.30    0.06
  10   0   8    0.27    0.06
  12   0   8   14.61    0.65
  12   0   8   14.25    0.67
  14   0   8    3.81    0.23
  14   0   8    3.98    0.23
  16   0   8   23.27    1.10
 -37  -1   8    0.08    0.05
 -37  -1   8    0.00    0.03
 -37  -1   8    0.01    0.03
 -37   1   8    0.03    0.04
 -37   1   8    0.04    0.03
 -35  -1   8    0.13    0.04
 -35  -1   8    0.24    0.06
 -35  -1   8    0.18    0.07
 -35   1   8    0.20    0.05
 -35   1   8    0.23    0.07
 -33  -1   8    0.48    0.10
 -33  -1   8    0.40    0.07
 -33  -1   8    0.64    0.10
 -33   1   8    0.46    0.10
 -33   1   8    0.35    0.09
 -33   1   8    0.46    0.07
 -31  -1   8    0.14    0.05
 -31  -1   8    0.22    0.08
 -31  -1   8    0.28    0.09
 -31   1   8    0.22    0.09
 -31   1   8    0.30    0.09
 -31   1   8    0.14    0.06
 -29  -1   8    0.03    0.05
 -29  -1   8    0.09    0.07
 -29  -1   8    0.07    0.07
 -29   1   8   -0.03    0.07
 -29   1   8    0.01    0.05
 -29   1   8    0.06    0.07
 -27  -1   8    0.65    0.11
 -27  -1   8    0.76    0.10
 -27  -1   8    1.00    0.14
 -27  -1   8    0.60    0.07
 -27   1   8    0.64    0.12
 -27   1   8    0.75    0.13
 -27   1   8    0.69    0.07
 -27   1   8    0.79    0.11
 -25  -1   8    0.04    0.05
 -25  -1   8    0.06    0.07
 -25  -1   8   -0.05    0.06
 -25  -1   8    0.02    0.04
 -25   1   8    0.03    0.06
 -25   1   8   -0.02    0.04
 -25   1   8    0.01    0.07
 -25   1   8    0.11    0.07
 -23  -1   8    0.08    0.07
 -23  -1   8    0.16    0.08
 -23  -1   8   -0.06    0.06
 -23   1   8    0.17    0.07
 -21  -1   8    0.53    0.10
 -21  -1   8    0.52    0.10
 -21  -1   8    0.57    0.10
 -21   1   8    0.51    0.10
 -19  -1   8    2.86    0.20
 -19  -1   8    2.69    0.22
 -19  -1   8    2.88    0.21
 -19   1   8    2.84    0.19
 -19   1   8    2.69    0.20
 -17  -1   8    1.70    0.16
 -17  -1   8    2.05    0.17
 -17  -1   8    1.55    0.14
 -17   1   8    1.97    0.17
 -17   1   8    1.85    0.15
 -17   1   8    1.73    0.15
 -15  -1   8    4.19    0.24
 -15  -1   8    4.69    0.25
 -15  -1   8    4.34    0.25
 -15   1   8    4.44    0.25
 -15   1   8    4.38    0.24
 -15   1   8    3.78    0.22
 -13  -1   8    5.78    0.30
 -13  -1   8    6.22    0.32
 -13  -1   8    5.61    0.30
 -13   1   8    5.70    0.31
 -13   1   8    6.43    0.31
  13   1  -8    5.94    0.33
 -13   1   8    6.04    0.29
 -11  -1   8    0.07    0.04
 -11  -1   8    0.09    0.04
 -11  -1   8    0.07    0.03
  11  -1  -8    0.07    0.04
 -11  -1   8    0.09    0.04
 -11   1   8    0.14    0.04
  11   1  -8    0.09    0.05
 -11   1   8    0.17    0.04
 -11   1   8    0.14    0.04
   9  -1  -8    3.95    0.23
  -9  -1   8    4.13    0.20
  -9  -1   8    4.22    0.21
  -9  -1   8    3.65    0.21
  -9  -1   8    3.86    0.20
   9   1  -8    3.73    0.23
  -9   1   8    4.11    0.19
  -9   1   8    3.81    0.21
  -9   1   8    4.15    0.20
  -7  -1   8    0.39    0.05
  -7  -1   8    0.42    0.05
   7  -1  -8    0.40    0.06
  -7  -1   8    0.29    0.05
  -7  -1   8    0.27    0.04
  -7   1   8    0.34    0.04
  -7   1   8    0.30    0.04
  -7   1   8    0.37    0.05
  -5  -1   8    1.69    0.10
   5  -1  -8    1.76    0.12
  -5  -1   8    1.61    0.10
  -5  -1   8    1.66    0.10
  -5  -1   8    1.57    0.10
  -5   1   8    1.59    0.10
  -5   1   8    1.48    0.09
  -5   1   8    1.71    0.10
   3  -1  -8    1.85    0.12
  -3  -1   8    1.78    0.10
  -3  -1   8    1.72    0.10
  -3  -1   8    1.66    0.11
  -3   1   8    1.62    0.10
  -3   1   8    1.85    0.11
  -1  -1   8    0.24    0.04
  -1  -1   8    0.18    0.04
  -1  -1   8    0.17    0.03
  -1   1   8    0.14    0.03
  -1   1   8    0.19    0.04
   1  -1   8    1.98    0.12
   1  -1   8    2.03    0.13
   1  -1   8    1.97    0.11
   1   1   8    2.07    0.12
   1   1   8    2.21    0.13
   3  -1   8   34.27    1.44
   3  -1   8   34.86    1.49
   3  -1   8   34.53    1.56
   3   1   8   35.97    1.50
   3   1   8   35.62    1.45
   5  -1   8    8.32    0.38
   5  -1   8    7.99    0.39
   5  -1   8    9.01    0.42
   5   1   8    8.27    0.39
   5   1   8    9.11    0.41
   7  -1   8    0.14    0.04
   7  -1   8    0.21    0.05
   7  -1   8    0.11    0.05
   7   1   8    0.17    0.05
   7   1   8    0.20    0.05
   9  -1   8    0.58    0.07
   9  -1   8    0.54    0.07
   9  -1   8    0.53    0.08
   9   1   8    0.57    0.08
   9   1   8    0.75    0.09
  11  -1   8    1.13    0.12
  11   1   8    1.27    0.13
  11   1   8    0.99    0.11
  13  -1   8    4.26    0.26
  13   1   8    4.27    0.25
  13   1   8    4.10    0.25
  15  -1   8    9.45    0.48
 -15  -1  -8    8.67    0.56
  15   1   8    9.01    0.46
 -19  -1  -8    0.13    0.08
 -19  -1  -8    0.19    0.09
 -21  -1  -8    0.90    0.12
 -38  -2   8    0.16    0.03
 -38  -2   8    0.31    0.05
 -38   2   8    0.16    0.03
 -36  -2   8    0.68    0.07
 -36  -2   8    0.44    0.07
 -36  -2   8    0.65    0.09
 -36   2   8    0.60    0.07
 -36   2   8    0.54    0.08
 -34  -2   8    0.44    0.08
 -34  -2   8    0.39    0.06
 -34  -2   8    0.49    0.09
 -34   2   8    0.61    0.08
 -34   2   8    0.42    0.09
 -32  -2   8    0.87    0.12
 -32  -2   8    0.59    0.08
 -32  -2   8    0.68    0.10
 -32   2   8    0.51    0.10
 -32   2   8    0.63    0.09
 -30  -2   8    0.79    0.09
 -30  -2   8    0.66    0.11
 -30  -2   8    1.01    0.13
 -30   2   8    0.60    0.09
 -30   2   8    0.65    0.12
 -28  -2   8    0.00    0.04
 -28  -2   8   -0.03    0.06
 -28  -2   8    0.04    0.06
 -28  -2   8    0.04    0.04
 -28   2   8    0.17    0.06
 -28   2   8    0.02    0.07
 -26  -2   8   10.64    0.48
 -26  -2   8   10.48    0.56
 -26  -2   8   10.70    0.54
 -26  -2   8   10.60    0.46
 -26   2   8   10.11    0.55
 -26   2   8   11.35    0.50
 -26   2   8   10.27    0.56
 -26   2   8   10.84    0.45
 -24  -2   8    8.58    0.38
 -24  -2   8    8.53    0.45
 -24  -2   8    8.02    0.38
 -24  -2   8    8.47    0.44
 -24   2   8    7.38    0.45
 -24   2   8    8.09    0.40
 -24   2   8    8.80    0.45
 -22  -2   8    0.17    0.08
 -22  -2   8    0.16    0.08
 -22   2   8    0.16    0.07
 -20  -2   8    7.07    0.41
 -20  -2   8    7.07    0.40
 -20  -2   8    7.29    0.39
 -20   2   8    7.69    0.41
 -18  -2   8    1.07    0.13
 -18  -2   8    1.29    0.14
 -18  -2   8    1.19    0.14
 -18   2   8    1.29    0.14
 -16  -2   8    0.04    0.05
 -16  -2   8    0.05    0.05
 -16  -2   8    0.13    0.05
 -16   2   8    0.15    0.06
 -14  -2   8    1.80    0.14
 -14  -2   8    1.93    0.15
 -14  -2   8    1.97    0.15
 -14  -2   8    2.06    0.15
 -14   2   8    1.93    0.14
 -14   2   8    2.28    0.15
  12  -2  -8   18.55    0.90
 -12  -2   8   19.33    0.90
 -12  -2   8   18.96    0.87
 -12  -2   8   19.72    0.84
 -12  -2   8   19.92    0.89
 -12   2   8   19.33    0.83
 -12   2   8   19.28    0.86
 -12   2   8   20.77    0.89
 -10  -2   8    3.43    0.20
 -10  -2   8    3.24    0.19
 -10  -2   8    3.42    0.19
  10  -2  -8    3.39    0.21
 -10  -2   8    3.59    0.19
 -10   2   8    3.32    0.18
 -10   2   8    3.76    0.18
  -8  -2   8    4.21    0.22
   8  -2  -8    4.43    0.24
  -8  -2   8    3.93    0.22
  -8  -2   8    4.61    0.22
  -8  -2   8    4.23    0.23
  -8   2   8    4.05    0.20
  -8   2   8    4.73    0.22
  -6  -2   8   12.13    0.54
  -6  -2   8   12.40    0.57
  -6  -2   8   12.30    0.57
   6  -2  -8   12.35    0.59
  -6  -2   8   12.40    0.56
  -6   2   8   12.86    0.55
  -6   2   8   12.46    0.53
  -4  -2   8   12.28    0.54
  -4  -2   8   12.71    0.58
   4  -2  -8   12.08    0.59
  -4  -2   8   13.28    0.58
  -4  -2   8   13.08    0.56
  -4   2   8   12.42    0.56
  -4   2   8   12.62    0.54
  -2  -2   8    0.18    0.04
   2  -2  -8    0.30    0.05
  -2  -2   8    0.23    0.04
  -2  -2   8    0.18    0.04
  -2  -2   8    0.13    0.03
  -2   2   8    0.15    0.04
  -2   2   8    0.22    0.04
   0  -2   8   25.56    1.10
   0  -2   8   24.94    1.06
   0  -2   8   25.93    1.15
   0   2   8   26.05    1.11
   0   2   8   26.12    1.07
   2  -2   8    0.05    0.03
   2  -2   8    0.02    0.02
   2  -2   8    0.02    0.03
   2   2   8    0.04    0.03
   2   2   8    0.07    0.04
   4  -2   8   46.36    1.97
   4  -2   8   45.70    1.90
   4  -2   8   46.74    2.06
   4   2   8   46.11    1.92
   4   2   8   48.39    1.99
   6  -2   8    8.75    0.43
   6   2   8    8.91    0.43
   6   2   8    8.70    0.41
   8  -2   8    8.17    0.42
   8   2   8    8.37    0.40
   8   2   8    8.21    0.41
  10  -2   8    0.19    0.06
  10   2   8    0.15    0.06
  10   2   8    0.09    0.05
 -12  -2  -8    3.67    0.30
  12  -2   8    3.92    0.24
  12   2   8    3.76    0.24
  12   2   8    3.88    0.23
  14  -2   8    2.40    0.18
 -14  -2  -8    2.50    0.26
 -14  -2  -8    2.18    0.18
  14   2   8    2.48    0.20
 -16  -2  -8    8.15    0.46
 -16  -2  -8    8.73    0.46
 -16  -2  -8   10.57    0.60
 -18  -2  -8    1.08    0.14
 -18  -2  -8    1.15    0.13
 -18  -2  -8    0.94    0.18
 -18  -2  -8    1.48    0.17
 -20  -2  -8    1.20    0.19
 -20  -2  -8    1.17    0.14
 -20  -2  -8    1.32    0.17
 -20  -2  -8    1.39    0.14
 -22  -2  -8    0.72    0.10
 -22  -2  -8    0.50    0.08
 -24  -2  -8   -0.06    0.05
 -37  -3   8    0.07    0.03
 -37  -3   8    0.13    0.04
 -37   3   8    0.10    0.03
 -35  -3   8    0.25    0.05
 -35  -3   8    0.16    0.06
 -35  -3   8    0.17    0.04
 -35   3   8    0.21    0.05
 -33  -3   8    0.15    0.06
 -33  -3   8    0.02    0.03
 -33  -3   8    0.01    0.04
 -33   3   8    0.03    0.04
 -31  -3   8    0.19    0.07
 -31  -3   8    0.22    0.07
 -31  -3   8    0.14    0.05
 -31   3   8    0.13    0.07
 -31   3   8    0.18    0.06
 -29  -3   8    0.41    0.05
 -29  -3   8    0.34    0.08
 -29  -3   8    0.38    0.09
 -29  -3   8    0.33    0.07
 -29   3   8    0.41    0.10
 -29   3   8    0.31    0.08
 -27  -3   8    1.05    0.14
 -27  -3   8    1.42    0.15
 -27  -3   8    1.24    0.12
 -27  -3   8    1.42    0.11
 -27   3   8    1.72    0.16
 -27   3   8    1.24    0.16
 -27   3   8    1.30    0.09
 -25  -3   8    0.09    0.07
 -25  -3   8    0.11    0.05
 -25  -3   8    0.16    0.06
 -25   3   8    0.29    0.08
 -25   3   8   -0.01    0.07
 -23  -3   8    2.54    0.19
 -23  -3   8    2.48    0.16
 -23  -3   8    2.89    0.23
 -23  -3   8    2.67    0.17
 -23   3   8    2.46    0.20
 -23   3   8    2.57    0.23
 -21  -3   8    0.96    0.13
 -21  -3   8    1.19    0.16
  21  -3  -8    1.49    0.18
 -21  -3   8    1.14    0.15
  19  -3  -8    2.85    0.25
 -19  -3   8    3.08    0.22
 -19  -3   8    2.85    0.25
 -19  -3   8    2.99    0.23
 -17  -3   8    7.32    0.43
  17  -3  -8    8.32    0.45
 -17  -3   8    8.51    0.43
 -15  -3   8    1.97    0.18
 -15  -3   8    2.00    0.17
 -15  -3   8    2.25    0.17
 -15  -3   8    2.39    0.17
  15  -3  -8    2.46    0.18
 -13  -3   8    4.93    0.28
 -13  -3   8    4.81    0.27
 -13  -3   8    5.14    0.29
  13  -3  -8    5.98    0.31
 -13  -3   8    4.96    0.29
  11  -3  -8    1.44    0.13
 -11  -3   8    1.19    0.12
 -11  -3   8    1.24    0.11
 -11  -3   8    1.06    0.11
 -11  -3   8    1.17    0.12
  -9  -3   8    8.52    0.43
  -9  -3   8    9.51    0.43
  -9  -3   8    8.69    0.44
  -9  -3   8    8.49    0.41
   9  -3  -8    9.44    0.45
  -9   3   8    8.66    0.40
  -7  -3   8    8.26    0.43
  -7  -3   8    8.92    0.43
  -7  -3   8    8.77    0.42
   7  -3  -8    9.12    0.44
  -7  -3   8    8.57    0.40
  -7   3   8    9.26    0.40
  -7   3   8    8.71    0.39
  -5  -3   8    3.55    0.20
  -5  -3   8    3.70    0.20
   5  -3  -8    3.52    0.21
  -5  -3   8    3.81    0.21
  -5  -3   8    3.65    0.19
  -5   3   8    3.79    0.18
  -5   3   8    3.49    0.19
  -3  -3   8    6.15    0.31
  -3  -3   8    6.27    0.31
   3  -3  -8    5.56    0.30
  -3  -3   8    6.08    0.28
  -3  -3   8    5.99    0.29
  -3   3   8    5.93    0.28
  -3   3   8    5.87    0.29
  -1  -3   8    3.83    0.19
   1  -3  -8    3.73    0.21
  -1  -3   8    3.83    0.21
  -1  -3   8    3.94    0.22
  -1   3   8    4.19    0.21
  -1   3   8    3.94    0.20
   1  -3   8    3.54    0.20
   1   3   8    3.62    0.19
   1   3   8    3.50    0.20
   3  -3   8    5.73    0.30
   3   3   8    5.55    0.28
   3   3   8    5.70    0.29
   5  -3   8    4.09    0.24
   5   3   8    3.93    0.23
   5   3   8    4.67    0.24
   7  -3   8    8.62    0.43
   7   3   8    8.44    0.42
   9  -3   8    0.86    0.10
   9   3   8    1.13    0.12
   9   3   8    0.87    0.11
  11  -3   8    2.39    0.17
  11   3   8    2.17    0.18
 -13  -3  -8    0.47    0.14
 -13  -3  -8    0.63    0.10
  13   3   8    0.64    0.11
 -15  -3  -8    4.88    0.28
 -15  -3  -8    4.42    0.26
 -15  -3  -8    4.15    0.25
 -15  -3  -8    3.95    0.30
 -15  -3  -8    4.95    0.37
 -17  -3  -8    0.40    0.11
 -17  -3  -8    0.50    0.14
 -17  -3  -8    0.48    0.09
 -17  -3  -8    0.49    0.08
 -17  -3  -8    0.61    0.11
 -19  -3  -8    4.52    0.30
 -19  -3  -8    4.19    0.25
 -19  -3  -8    4.84    0.36
 -19  -3  -8    4.01    0.27
 -19  -3  -8    3.97    0.25
 -21  -3  -8    0.70    0.11
 -21  -3  -8    0.67    0.10
 -21  -3  -8    0.49    0.11
 -21  -3  -8    0.55    0.08
 -23  -3  -8    0.46    0.08
 -23  -3  -8    0.59    0.08
 -23  -3  -8    0.26    0.06
 -25  -3  -8    0.30    0.06
 -25  -3  -8    0.06    0.03
 -27  -3  -8    0.02    0.02
 -36  -4   8    0.04    0.02
 -36   4   8    0.00    0.02
 -34  -4   8    0.78    0.08
 -34  -4   8    0.80    0.07
 -34  -4   8    0.79    0.09
 -34   4   8    0.73    0.08
  34   4  -8    0.90    0.12
 -32  -4   8    0.13    0.06
 -32  -4   8    0.17    0.04
 -32  -4   8    0.20    0.06
 -32   4   8    0.15    0.05
 -30  -4   8    0.45    0.09
 -30  -4   8    0.26    0.07
 -30  -4   8    0.35    0.06
 -30   4   8    0.31    0.07
 -28  -4   8    1.48    0.16
 -28  -4   8    1.33    0.14
 -28  -4   8    1.05    0.10
 -28  -4   8    1.26    0.11
 -28  -4   8    0.87    0.14
 -28   4   8    1.15    0.13
 -26  -4   8    2.16    0.20
 -26  -4   8    2.33    0.15
 -26  -4   8    2.52    0.20
 -26  -4   8    1.98    0.20
 -26  -4   8    2.19    0.15
 -26   4   8    2.30    0.19
 -24  -4   8    3.18    0.18
 -24  -4   8    3.01    0.17
 -24  -4   8    2.82    0.25
 -24  -4   8    2.57    0.19
 -24  -4   8    2.83    0.22
 -24   4   8    3.30    0.21
 -24   4   8    2.78    0.25
 -22  -4   8    1.61    0.13
 -22  -4   8    1.74    0.18
 -22  -4   8    1.76    0.17
 -22  -4   8    1.41    0.13
 -22   4   8    1.57    0.16
 -22   4   8    1.81    0.19
  20  -4  -8    3.37    0.27
 -20  -4   8    2.63    0.23
 -20  -4   8    2.42    0.21
 -18  -4   8    0.90    0.13
 -18  -4   8    0.73    0.12
  18  -4  -8    1.08    0.15
 -16  -4   8    2.00    0.18
 -16  -4   8    1.72    0.17
  16  -4  -8    1.93    0.19
 -16  -4   8    1.84    0.18
 -16  -4   8    1.55    0.17
 -14  -4   8    2.72    0.20
 -14  -4   8    3.09    0.21
  14  -4  -8    3.32    0.22
 -14  -4   8    2.64    0.20
 -14  -4   8    2.78    0.19
 -12  -4   8    7.99    0.43
 -12  -4   8    7.54    0.39
 -12  -4   8    7.79    0.41
 -12  -4   8    8.40    0.42
 -10  -4   8    4.70    0.26
 -10  -4   8    3.69    0.23
 -10  -4   8    4.09    0.24
  10  -4  -8    4.04    0.25
 -10  -4   8    4.14    0.24
  -8  -4   8    0.71    0.09
  -8  -4   8    0.76    0.09
   8  -4  -8    0.88    0.11
  -8  -4   8    0.99    0.10
  -8  -4   8    0.96    0.11
  -6  -4   8    7.18    0.38
  -6  -4   8    7.03    0.35
  -6  -4   8    7.85    0.38
   6  -4  -8    7.07    0.38
  -4  -4   8    4.43    0.26
  -4  -4   8    4.68    0.26
   4  -4  -8    4.64    0.26
  -4   4   8    4.72    0.23
  -2  -4   8    0.01    0.04
  -2  -4   8   -0.03    0.03
   2  -4  -8    0.00    0.04
  -2   4   8    0.05    0.03
  -2   4   8    0.00    0.03
   0  -4   8    4.20    0.25
   0  -4  -8    4.35    0.23
   0  -4   8    4.77    0.25
   0   4   8    4.72    0.24
   0   4   8    4.26    0.23
   2  -4   8    2.00    0.15
   2   4   8    2.16    0.14
   2   4   8    2.07    0.14
   4  -4   8    1.27    0.12
   4   4   8    1.14    0.11
   4   4   8    1.24    0.12
   6  -4   8    1.52    0.14
   6   4   8    1.91    0.15
   6   4   8    1.56    0.14
   8  -4   8    2.36    0.17
   8   4   8    2.95    0.19
   8   4   8    2.65    0.18
 -10  -4  -8    0.20    0.06
  10  -4   8    0.22    0.06
  10   4   8    0.22    0.07
 -12  -4  -8    0.24    0.06
 -12  -4  -8    0.25    0.07
 -12  -4  -8    0.20    0.07
 -12  -4  -8    0.18    0.11
 -14  -4  -8    2.18    0.24
 -14  -4  -8    2.09    0.17
 -14  -4  -8    2.14    0.19
 -14  -4  -8    1.92    0.17
 -14  -4  -8    1.14    0.17
 -16  -4  -8    5.09    0.30
 -16  -4  -8    4.53    0.33
 -16  -4  -8    5.52    0.40
 -16  -4  -8    5.19    0.29
 -16  -4  -8    5.07    0.31
 -18  -4  -8    2.61    0.22
 -18  -4  -8    2.78    0.25
 -18  -4  -8    2.33    0.17
 -18  -4  -8    2.69    0.28
 -18  -4  -8    1.78    0.16
 -20  -4  -8    0.27    0.10
 -20  -4  -8    0.24    0.06
 -20  -4  -8    0.23    0.08
 -20  -4  -8    0.25    0.07
 -22  -4  -8    0.26    0.06
 -22  -4  -8    0.18    0.05
 -22  -4  -8    0.24    0.09
 -22  -4  -8    0.17    0.06
 -24  -4  -8    0.03    0.03
 -24  -4  -8    0.09    0.04
 -26  -4  -8    0.02    0.04
 -26  -4  -8    0.02    0.03
 -33  -5   8    0.18    0.04
 -33  -5   8    0.20    0.05
 -33  -5   8    0.25    0.04
 -33   5   8    0.19    0.04
 -31  -5   8    0.01    0.05
 -31  -5   8   -0.01    0.03
 -31  -5   8    0.01    0.04
 -31  -5   8    0.01    0.06
  31   5  -8    0.02    0.06
 -31   5   8    0.00    0.04
 -29  -5   8   -0.04    0.06
 -29  -5   8   -0.02    0.05
 -29  -5   8   -0.01    0.04
 -29  -5   8    0.00    0.04
  29   5  -8    0.05    0.07
 -29   5   8    0.01    0.05
 -27  -5   8    1.47    0.15
 -27  -5   8    1.82    0.18
 -27  -5   8    1.56    0.12
 -27  -5   8    1.76    0.13
 -27   5   8    1.32    0.14
  27   5  -8    1.78    0.21
 -25  -5   8    0.99    0.14
 -25  -5   8    0.78    0.09
 -25  -5   8    0.82    0.11
 -25  -5   8    0.99    0.10
  25   5  -8    1.03    0.16
 -25   5   8    0.98    0.12
 -23  -5   8    1.11    0.15
 -23  -5   8    0.85    0.11
 -23  -5   8    1.39    0.11
  23   5  -8    1.27    0.18
 -23   5   8    1.01    0.13
 -21  -5   8    0.34    0.10
 -21  -5   8    0.21    0.07
 -21  -5   8    0.22    0.06
  21   5  -8    0.40    0.12
 -21   5   8    0.21    0.08
 -19  -5   8    1.58    0.15
 -19  -5   8    1.87    0.18
 -19  -5   8    1.60    0.13
 -19   5   8    1.65    0.12
  19   5  -8    1.80    0.22
 -19   5   8    1.79    0.17
 -17  -5   8    0.70    0.12
 -17  -5   8    0.61    0.12
 -17   5   8    0.51    0.10
  17   5  -8    0.46    0.12
 -17   5   8    0.66    0.09
 -15  -5   8    0.36    0.10
 -15  -5   8    0.26    0.08
 -15  -5   8    0.27    0.08
 -13  -5   8    0.14    0.07
 -13  -5   8    0.05    0.06
 -13  -5   8    0.07    0.07
 -11  -5   8    4.16    0.27
 -11  -5   8    4.02    0.27
  11  -5  -8    4.24    0.27
   9  -5  -8    3.94    0.26
  -9  -5   8    4.53    0.26
  -9  -5   8    4.03    0.26
   7  -5  -8    3.12    0.21
  -7  -5   8    2.92    0.21
  -7  -5   8    3.16    0.21
  -5  -5   8    0.47    0.08
   5  -5  -8    0.67    0.09
  -5  -5   8    0.56    0.09
  -3  -5   8    0.02    0.05
   3  -5  -8    0.08    0.05
  -3  -5   8    0.03    0.04
  -1  -5   8    4.06    0.24
   1  -5  -8    3.60    0.22
  -1  -5   8    3.90    0.24
   1  -5   8    1.37    0.13
   1  -5   8    1.54    0.14
   3  -5   8    0.74    0.10
   3   5   8    1.08    0.11
   5  -5   8    1.51    0.14
   5   5   8    1.21    0.13
   5   5   8    1.13    0.12
  -7  -5  -8    1.40    0.14
   7  -5   8    1.96    0.16
   7   5   8    1.65    0.16
  -9  -5  -8    0.10    0.10
  -9  -5  -8    0.05    0.05
  -9  -5  -8    0.09    0.05
  -9  -5  -8   -0.05    0.06
  -9   5  -8    0.05    0.06
 -11  -5  -8    8.25    0.51
 -11  -5  -8    7.10    0.35
 -11  -5  -8    7.07    0.39
 -11  -5  -8    6.77    0.43
 -11  -5  -8    7.38    0.38
 -11  -5  -8    6.87    0.38
 -13  -5  -8    1.57    0.21
 -13  -5  -8    1.30    0.18
 -13  -5  -8    1.20    0.14
 -13  -5  -8    1.42    0.14
 -13  -5  -8    1.19    0.11
 -13  -5  -8    1.17    0.14
 -15  -5  -8    0.56    0.09
 -15  -5  -8    0.39    0.10
 -15  -5  -8    0.57    0.09
 -15  -5  -8    0.67    0.15
 -15  -5  -8    0.32    0.11
 -17  -5  -8    0.28    0.07
 -17  -5  -8    0.22    0.06
 -17  -5  -8    0.13    0.09
 -17  -5  -8    0.29    0.09
 -19  -5  -8    0.34    0.07
 -19  -5  -8    0.28    0.07
 -19  -5  -8    0.54    0.09
 -19  -5  -8    0.42    0.11
 -21  -5  -8    0.06    0.04
 -21  -5  -8    0.01    0.07
 -21  -5  -8    0.09    0.05
 -21  -5  -8    0.01    0.04
 -23  -5  -8    0.20    0.08
 -23  -5  -8    0.04    0.03
 -23  -5  -8    0.27    0.05
 -25  -5  -8    0.07    0.04
 -25  -5  -8    0.14    0.04
 -32  -6   8    0.17    0.03
 -32  -6   8    0.15    0.05
 -32   6   8    0.12    0.04
 -30  -6   8    0.39    0.05
 -30  -6   8    0.45    0.08
  30   6  -8    0.27    0.08
 -30   6   8    0.23    0.05
 -28  -6   8    0.53    0.09
 -28  -6   8    0.46    0.06
 -28  -6   8    0.51    0.05
 -28   6   8    0.47    0.08
  28   6  -8    0.47    0.11
 -26  -6   8    0.70    0.08
 -26  -6   8    0.68    0.11
 -26  -6   8    0.65    0.08
 -26   6   8    0.52    0.09
  26   6  -8    0.77    0.14
 -24  -6   8    0.73    0.08
 -24  -6   8    0.70    0.11
 -24  -6   8    0.60    0.09
 -24   6   8    0.62    0.10
  24   6  -8    0.55    0.12
 -22  -6   8    0.16    0.05
 -22  -6   8    0.19    0.08
 -22  -6   8    0.16    0.06
 -22   6   8    0.23    0.08
  22   6  -8    0.12    0.08
 -20  -6   8    1.11    0.10
 -20  -6   8    1.11    0.13
 -20  -6   8    1.04    0.14
  20   6  -8    1.03    0.17
 -20   6   8    1.27    0.14
 -18  -6   8    0.16    0.08
 -18  -6   8    0.11    0.05
  18   6  -8    0.04    0.08
 -18   6   8    0.10    0.07
 -18   6   8    0.07    0.05
 -16  -6   8    0.41    0.09
 -16   6   8    0.35    0.09
  16   6  -8    0.56    0.13
 -16   6   8    0.61    0.09
 -14  -6   8    1.29    0.16
 -14  -6   8    1.02    0.13
 -14   6   8    1.32    0.13
 -14   6   8    1.09    0.14
  14   6  -8    1.36    0.19
 -12   6   8    0.15    0.07
  12   6  -8    0.07    0.08
 -12   6   8    0.13    0.07
  10   6  -8    2.19    0.25
  -8  -6   8    0.07    0.06
  -8  -6   8    0.09    0.07
  -6  -6   8    0.28    0.08
  -6  -6   8    0.23    0.08
  -4  -6   8    1.13    0.14
  -4  -6   8    1.10    0.14
  -2  -6   8    0.90    0.12
  -2  -6   8    1.05    0.13
   0  -6   8    0.75    0.11
   0  -6   8    0.44    0.09
   2  -6   8    0.10    0.07
  -2   6  -8    0.12    0.07
  -2   6  -8    0.11    0.10
  -4  -6  -8    1.60    0.17
  -4  -6  -8    2.04    0.16
  -4   6  -8    2.03    0.19
  -4   6  -8    1.74    0.12
  -6  -6  -8    0.77    0.14
  -6  -6  -8    0.82    0.12
  -6  -6  -8    0.64    0.15
  -6  -6  -8    0.77    0.10
  -6   6  -8    0.86    0.13
  -8  -6  -8    0.85    0.16
  -8  -6  -8    0.98    0.12
  -8  -6  -8    0.86    0.15
  -8  -6  -8    0.82    0.11
  -8   6  -8    1.12    0.12
 -10  -6  -8    0.20    0.07
 -10  -6  -8    0.44    0.12
 -10  -6  -8    0.27    0.07
 -10  -6  -8    0.19    0.08
 -10  -6  -8    0.21    0.09
 -12  -6  -8    1.73    0.14
 -12  -6  -8    1.96    0.18
 -12  -6  -8    1.97    0.22
 -12  -6  -8    1.48    0.15
 -12  -6  -8    1.63    0.21
 -14  -6  -8    0.49    0.09
 -14  -6  -8    0.53    0.10
 -14  -6  -8    0.42    0.06
 -14  -6  -8    0.28    0.10
 -16  -6  -8    0.66    0.11
 -16  -6  -8    0.58    0.09
 -16  -6  -8    0.71    0.13
 -18  -6  -8    0.74    0.13
 -18  -6  -8    1.06    0.11
 -18  -6  -8    1.07    0.13
 -20  -6  -8    0.03    0.03
 -20  -6  -8    0.18    0.05
 -20  -6  -8    0.13    0.07
 -22  -6  -8    0.01    0.02
 -22  -6  -8    0.16    0.04
 -22  -6  -8    0.03    0.06
 -24  -6  -8    0.03    0.02
 -29  -7   8    0.26    0.06
 -29   7   8    0.12    0.04
 -27  -7   8    0.06    0.03
 -27  -7   8    0.06    0.05
 -27  -7   8    0.08    0.03
 -27   7   8   -0.02    0.04
 -25  -7   8    0.15    0.04
 -25  -7   8    0.17    0.07
 -25  -7   8    0.18    0.05
  25   7  -8    0.20    0.08
 -25   7   8    0.10    0.05
 -23  -7   8    0.31    0.07
 -23  -7   8    0.36    0.06
 -23  -7   8    0.32    0.08
  23   7  -8    0.39    0.11
 -23   7   8    0.32    0.08
 -21  -7   8    0.62    0.11
 -21  -7   8    0.88    0.09
 -21  -7   8    0.67    0.10
 -21   7   8    0.86    0.11
  21   7  -8    0.87    0.15
 -19  -7   8    0.01    0.06
 -19  -7   8    0.09    0.06
 -19  -7   8    0.09    0.05
 -19   7   8    0.04    0.06
  19   7  -8    0.00    0.07
 -17  -7   8    0.11    0.07
 -17  -7   8    0.17    0.08
  17   7  -8    0.23    0.10
 -17   7   8    0.27    0.08
 -17   7   8    0.18    0.05
 -15  -7   8    0.23    0.08
 -15  -7   8    0.10    0.08
 -15   7   8    0.17    0.07
  15   7  -8    0.30    0.11
 -15   7   8    0.19    0.06
 -13  -7   8    0.07    0.07
 -13  -7   8    0.06    0.07
  13   7  -8    0.15    0.09
 -13   7   8    0.08    0.06
 -13   7   8    0.24    0.08
 -11  -7   8    0.09    0.07
 -11  -7   8   -0.03    0.06
  11   7  -8    0.06    0.09
 -11   7   8    0.14    0.07
 -11   7   8    0.03    0.06
  -9  -7   8    0.56    0.10
  -9  -7   8    0.53    0.11
  -9   7   8    0.30    0.10
  -9   7   8    0.55    0.10
   9   7  -8    0.55    0.14
  -7  -7   8    0.43    0.10
  -7   7   8    0.55    0.10
   7   7  -8    0.35    0.12
  -5  -7   8    0.76    0.13
  -5   7   8    0.65    0.11
   5   7  -8    0.70    0.16
   5   7  -8    0.57    0.12
  -3  -7   8    0.66    0.11
  -3   7   8    0.46    0.10
  -3   7   8    0.77    0.10
   3   7  -8    0.64    0.16
   3   7  -8    0.40    0.11
   1  -7  -8    0.19    0.06
  -1  -7   8    0.32    0.09
  -1   7   8    0.31    0.07
   1   7  -8    0.30    0.12
   1   7  -8    0.28    0.09
  -1   7   8    0.48    0.09
  -1  -7  -8    1.00    0.11
  -1   7  -8    0.84    0.14
  -1   7  -8    0.76    0.11
   1   7   8    1.00    0.12
  -3  -7  -8    0.89    0.15
  -3  -7  -8    0.93    0.11
  -3   7  -8    0.97    0.14
  -3   7  -8    1.06    0.10
  -5  -7  -8    0.49    0.12
  -5  -7  -8    0.70    0.09
  -5  -7  -8    0.58    0.11
  -5   7  -8    0.68    0.11
  -7  -7  -8    1.12    0.12
  -7  -7  -8    0.84    0.14
  -7  -7  -8    0.78    0.12
  -7   7  -8    1.04    0.12
  -9  -7  -8    0.16    0.09
  -9  -7  -8    0.23    0.08
  -9  -7  -8    0.21    0.06
  -9   7  -8    0.24    0.06
 -11  -7  -8    2.18    0.17
 -11  -7  -8    2.32    0.16
 -11  -7  -8    1.95    0.21
 -11  -7  -8    2.53    0.20
 -13  -7  -8    0.06    0.05
 -13  -7  -8    0.04    0.07
 -13  -7  -8    0.12    0.05
 -13  -7  -8    0.14    0.07
 -15  -7  -8    0.35    0.10
 -15  -7  -8    0.41    0.07
 -15  -7  -8    0.37    0.08
 -17  -7  -8    0.16    0.07
 -17  -7  -8    0.12    0.05
 -17  -7  -8    0.08    0.06
 -19  -7  -8    0.07    0.03
 -19  -7  -8    0.19    0.04
 -19  -7  -8    0.22    0.07
 -21  -7  -8    0.09    0.03
 -21  -7  -8    0.01    0.02
 -21  -7  -8    0.08    0.06
 -26  -8   8    0.20    0.05
 -26   8   8    0.24    0.05
 -24  -8   8    0.49    0.08
 -24  -8   8    0.41    0.05
  24   8  -8    0.37    0.05
 -24   8   8    0.65    0.08
 -22  -8   8    0.08    0.05
 -22  -8   8    0.10    0.05
  22   8  -8    0.03    0.04
 -22   8   8    0.06    0.05
  22   8  -8    0.08    0.07
 -20  -8   8    0.72    0.10
 -20  -8   8    0.63    0.09
  20   8  -8    0.60    0.07
 -20   8   8    0.50    0.09
  20   8  -8    0.76    0.14
 -18  -8   8    0.25    0.08
 -18  -8   8    0.23    0.08
 -18  -8   8    0.18    0.07
 -18   8   8    0.19    0.07
  18   8  -8    0.39    0.12
 -16  -8   8    0.36    0.09
 -16  -8   8    0.49    0.10
 -16   8   8    0.62    0.06
  16   8  -8    0.37    0.12
 -16   8   8    0.50    0.09
 -14  -8   8    0.24    0.08
 -14  -8   8    0.12    0.07
 -14   8   8    0.25    0.06
  14   8  -8    0.18    0.10
 -14   8   8    0.15    0.06
 -12  -8   8   -0.05    0.06
 -12  -8   8   -0.01    0.06
 -12   8   8    0.04    0.06
 -12   8   8   -0.03    0.05
  12   8  -8   -0.02    0.07
 -10  -8   8    0.88    0.13
 -10   8   8    0.84    0.11
 -10   8   8    0.62    0.10
  10   8  -8    1.12    0.20
  -8  -8   8    0.01    0.06
  -8   8   8    0.08    0.07
   8   8  -8    0.11    0.09
  -8   8   8    0.05    0.07
   8   8  -8    0.13    0.09
  -6  -8   8    0.04    0.07
   6   8  -8    0.03    0.08
   6   8  -8    0.00    0.08
  -6   8   8   -0.02    0.06
  -4  -8   8    0.16    0.07
  -4   8   8    0.17    0.08
   4   8  -8    0.21    0.09
   4   8  -8    0.32    0.12
  -2  -8   8    0.05    0.06
   2   8  -8    0.02    0.07
  -2   8   8    0.10    0.07
   0  -8   8    0.63    0.11
   0   8  -8    0.49    0.08
   0   8   8    0.59    0.10
   0   8  -8    0.42    0.11
  -2  -8  -8    0.21    0.09
   2  -8   8    0.46    0.10
   2   8   8    0.50    0.08
  -2   8  -8    0.35    0.10
  -2   8  -8    0.42    0.06
   2   8   8    0.35    0.08
   4  -8   8    0.25    0.08
  -4  -8  -8    0.24    0.09
  -4  -8  -8    0.33    0.09
  -4  -8  -8    0.26    0.07
   4   8   8    0.32    0.07
  -4   8  -8    0.27    0.09
   4   8   8    0.34    0.08
   6  -8   8    0.00    0.06
  -6  -8  -8    0.11    0.05
  -6  -8  -8    0.23    0.08
  -6  -8  -8   -0.01    0.07
  -6   8  -8    0.17    0.06
   6   8   8    0.16    0.07
  -8  -8  -8    0.14    0.07
  -8  -8  -8    0.11    0.05
   8  -8   8    0.28    0.08
  -8  -8  -8    0.28    0.09
  -8   8  -8    0.19    0.05
 -10  -8  -8    0.01    0.04
 -10  -8  -8    0.01    0.06
 -10  -8  -8    0.04    0.05
 -12  -8  -8    0.01    0.04
 -12  -8  -8   -0.01    0.06
 -14  -8  -8    0.14    0.04
 -14  -8  -8    0.15    0.07
 -16  -8  -8    0.04    0.05
 -16  -8  -8   -0.01    0.03
 -16  -8  -8   -0.01    0.04
 -18  -8  -8    0.01    0.04
 -21  -9   8    0.18    0.05
 -21  -9   8    0.18    0.04
 -21   9   8    0.14    0.04
 -19  -9   8    0.02    0.04
 -19  -9   8    0.05    0.04
 -19  -9   8    0.00    0.05
 -19   9   8    0.06    0.04
 -17  -9   8   -0.01    0.05
 -17  -9   8    0.02    0.05
 -17  -9   8   -0.05    0.05
 -17   9   8   -0.02    0.04
  17   9  -8    0.03    0.07
 -15  -9   8    0.37    0.07
 -15  -9   8    0.33    0.08
 -15   9   8    0.32    0.07
  15   9  -8    0.60    0.13
 -13  -9   8    0.02    0.05
 -13   9   8    0.06    0.04
 -13   9   8    0.10    0.05
  13   9  -8    0.04    0.07
 -11  -9   8    0.07    0.06
  11   9  -8    0.12    0.08
  11   9  -8    0.03    0.07
 -11   9   8    0.07    0.05
 -11   9   8    0.08    0.06
  -9  -9   8    0.13    0.07
  -9   9   8    0.05    0.06
   9   9  -8    0.13    0.08
  -9   9   8    0.20    0.07
  -7  -9   8    0.05    0.06
   7   9  -8    0.10    0.07
  -7   9   8   -0.01    0.06
  -7   9   8    0.00    0.06
  -5  -9   8    0.02    0.06
  -5   9   8   -0.01    0.06
   5   9  -8    0.03    0.06
  -5   9   8    0.04    0.06
  -3  -9   8    0.06    0.06
   3   9  -8    0.07    0.06
   3   9  -8    0.01    0.08
  -3   9   8    0.11    0.06
  -1  -9   8    0.07    0.06
  -1   9   8    0.10    0.06
   1   9  -8    0.07    0.04
   1   9  -8   -0.02    0.07
   1  -9   8   -0.05    0.05
  -1   9  -8   -0.04    0.06
   1   9   8    0.00    0.05
  -3  -9  -8    0.21    0.08
  -3  -9  -8    0.17    0.08
   3  -9   8    0.23    0.07
   3   9   8    0.23    0.07
  -3   9  -8    0.23    0.07
  -5  -9  -8   -0.02    0.06
   5  -9   8    0.07    0.06
  -5  -9  -8    0.09    0.06
  -5   9  -8    0.08    0.05
   5   9   8    0.06    0.05
  -7  -9  -8    0.03    0.05
  -7  -9  -8    0.04    0.06
  -9  -9  -8    0.15    0.05
  -9  -9  -8    0.14    0.06
 -11  -9  -8   -0.02    0.05
 -11  -9  -8    0.03    0.03
  11   9   8    0.00    0.03
 -13  -9  -8    0.06    0.05
 -14 -10   8    0.08    0.05
 -14  10   8    0.01    0.04
 -12 -10   8    0.02    0.04
 -12  10   8    0.04    0.04
  12  10  -8    0.03    0.04
 -10 -10   8    0.07    0.05
 -10  10   8    0.04    0.03
  10  10  -8   -0.01    0.04
 -10  10   8    0.07    0.04
  -8 -10   8   -0.01    0.04
  -8  10   8    0.08    0.04
   8  10  -8    0.04    0.04
  -8  10   8    0.03    0.04
  -6 -10   8   -0.04    0.04
  -6  10   8    0.03    0.04
   6  10  -8   -0.06    0.03
  -6  10   8    0.08    0.05
  -4 -10   8   -0.06    0.04
  -4  10   8    0.02    0.05
   4  10  -8    0.05    0.06
   4  10  -8    0.02    0.03
  -4  10   8    0.02    0.04
  -2 -10   8    0.07    0.05
   2  10  -8    0.00    0.05
  -2  10   8    0.12    0.05
  -2  10   8    0.05    0.05
   0 -10   8    0.06    0.05
   0  10  -8    0.06    0.05
   0  10   8    0.00    0.04
   2 -10   8    0.00    0.04
  -2 -10  -8    0.08    0.05
  -2  10  -8    0.06    0.04
   2  10   8    0.01    0.04
  -4 -10  -8    0.07    0.05
  -6 -10  -8    0.02    0.04
 -38   0   9    0.01    0.03
 -38   0   9    0.06    0.03
 -36   0   9    0.00    0.03
 -36   0   9    0.00    0.05
 -36   0   9   -0.01    0.04
 -34   0   9   -0.05    0.06
 -34   0   9    0.10    0.06
 -34   0   9    0.08    0.04
 -32   0   9    0.04    0.06
 -32   0   9    0.01    0.04
 -32   0   9    0.09    0.07
 -30   0   9    0.22    0.08
 -30   0   9    0.03    0.04
 -30   0   9    0.16    0.07
 -28   0   9    0.04    0.07
 -28   0   9    0.35    0.07
 -28   0   9    0.23    0.09
 -28   0   9    0.36    0.06
 -26   0   9    1.69    0.18
 -26   0   9    1.52    0.12
 -26   0   9    1.43    0.17
 -26   0   9    1.66    0.14
 -24   0   9    0.92    0.14
 -24   0   9    0.79    0.12
 -24   0   9    0.57    0.12
 -22   0   9    0.38    0.09
 -22   0   9    0.50    0.10
 -22   0   9    0.41    0.10
 -20   0   9    0.39    0.09
 -20   0   9    0.21    0.07
 -20   0   9    0.20    0.07
 -18   0   9    0.00    0.05
 -18   0   9    0.00    0.04
 -18   0   9    0.00    0.05
 -16   0   9    2.90    0.18
 -16   0   9    2.72    0.19
 -16   0   9    3.32    0.20
 -14   0   9    4.59    0.24
 -14   0   9    4.26    0.25
 -14   0   9    4.62    0.25
  14   0  -9    4.32    0.27
 -12   0   9    6.00    0.30
 -12   0   9    5.88    0.29
  12   0  -9    5.82    0.32
 -12   0   9    5.83    0.31
 -10   0   9   10.40    0.46
 -10   0   9    9.53    0.47
 -10   0   9   10.25    0.45
  10   0  -9    9.64    0.49
  -8   0   9    1.82    0.12
  -8   0   9    2.26    0.12
   8   0  -9    2.17    0.15
  -8   0   9    2.11    0.13
  -6   0   9    0.02    0.02
  -6   0   9    0.02    0.02
   6   0  -9    0.05    0.04
  -6   0   9    0.00    0.02
  -4   0   9    1.99    0.12
  -4   0   9    1.90    0.11
  -4   0   9    1.84    0.11
  -2   0   9    2.59    0.16
  -2   0   9    2.70    0.15
  -2   0   9    2.62    0.14
   0   0   9   30.06    1.36
   0   0   9   30.97    1.27
   0   0   9   30.66    1.31
   2   0   9    0.01    0.03
   2   0   9    0.05    0.04
   2   0   9    0.00    0.03
   4   0   9    5.30    0.26
   4   0   9    5.45    0.27
   6   0   9    0.04    0.04
   6   0   9   -0.04    0.03
   8   0   9    1.92    0.13
   8   0   9    1.86    0.13
  10   0   9    1.08    0.11
  10   0   9    0.77    0.09
  12   0   9    2.29    0.18
  12   0   9    1.82    0.18
  12   0   9    2.23    0.16
  14   0   9    0.08    0.07
 -16   0  -9    2.28    0.23
 -16   0  -9    2.67    0.20
 -18   0  -9    0.62    0.12
 -37  -1   9    0.07    0.04
 -37  -1   9    0.13    0.05
 -37  -1   9    0.04    0.03
 -37   1   9    0.05    0.03
 -37   1   9    0.02    0.04
 -35  -1   9    0.16    0.06
 -35  -1   9    0.19    0.05
 -35  -1   9    0.15    0.06
 -35   1   9    0.13    0.04
 -35   1   9    0.23    0.07
 -35   1   9    0.19    0.07
 -33  -1   9    0.35    0.08
 -33  -1   9    0.30    0.09
 -33  -1   9    0.32    0.06
 -33   1   9    0.33    0.08
 -33   1   9    0.34    0.07
 -33   1   9    0.40    0.09
 -31  -1   9    1.71    0.18
 -31  -1   9    2.05    0.19
 -31  -1   9    1.40    0.12
 -31   1   9    1.74    0.18
 -31   1   9    1.67    0.14
 -31   1   9    1.39    0.17
 -29  -1   9    4.03    0.28
 -29  -1   9    4.39    0.27
 -29  -1   9    4.38    0.23
 -29  -1   9    3.73    0.19
 -29   1   9    4.19    0.28
 -29   1   9    3.74    0.28
 -29   1   9    4.02    0.23
 -27  -1   9    0.20    0.06
 -27  -1   9    0.37    0.10
 -27  -1   9    0.40    0.10
 -27  -1   9    0.25    0.07
 -27   1   9    0.26    0.05
 -27   1   9    0.23    0.07
 -27   1   9    0.21    0.09
 -27   1   9    0.18    0.08
 -25  -1   9   11.94    0.50
 -25  -1   9   10.66    0.57
 -25  -1   9   11.13    0.52
 -25  -1   9   12.17    0.61
 -25   1   9   11.92    0.53
 -25   1   9   10.79    0.60
 -25   1   9   12.50    0.59
 -25   1   9   11.91    0.50
 -23  -1   9    0.18    0.08
 -23  -1   9    0.23    0.09
 -23  -1   9    0.24    0.08
 -23   1   9    0.25    0.08
 -23   1   9    0.20    0.08
 -21  -1   9    0.79    0.12
 -21  -1   9    0.78    0.12
 -21  -1   9    0.87    0.13
 -19  -1   9    3.68    0.23
 -19  -1   9    3.66    0.24
 -19  -1   9    3.71    0.25
 -19   1   9    3.78    0.24
 -19   1   9    3.12    0.22
 -17  -1   9    0.96    0.11
 -17  -1   9    0.95    0.12
 -17  -1   9    0.91    0.12
 -17   1   9    0.92    0.11
 -17   1   9    0.96    0.11
 -17   1   9    1.01    0.12
 -15  -1   9    8.12    0.40
 -15  -1   9    8.18    0.41
 -15  -1   9    7.82    0.38
 -15   1   9    7.92    0.40
 -15   1   9    7.24    0.37
 -15   1   9    7.27    0.38
  13  -1  -9   72.13    3.05
 -13  -1   9   68.08    2.82
 -13  -1   9   69.12    3.02
  13   1  -9   66.72    3.05
 -13   1   9   66.37    3.01
 -13   1   9   66.94    2.82
 -13   1   9   73.21    2.92
  11  -1  -9    6.26    0.33
 -11  -1   9    5.93    0.31
 -11  -1   9    5.75    0.29
 -11  -1   9    6.15    0.31
 -11  -1   9    6.00    0.30
 -11   1   9    6.13    0.30
 -11   1   9    6.09    0.29
  11   1  -9    6.27    0.34
  -9  -1   9    6.20    0.31
   9  -1  -9    6.50    0.34
  -9  -1   9    6.09    0.31
  -9  -1   9    5.94    0.31
  -9  -1   9    6.29    0.30
  -9   1   9    6.38    0.29
   9   1  -9    6.64    0.34
  -9   1   9    6.72    0.31
  -7  -1   9    2.04    0.12
  -7  -1   9    2.03    0.12
   7  -1  -9    2.04    0.14
  -7  -1   9    1.93    0.12
  -7   1   9    1.86    0.12
  -7   1   9    1.92    0.11
  -7   1   9    1.82    0.11
  -5  -1   9   16.22    0.69
   5  -1  -9   15.03    0.72
  -5  -1   9   15.15    0.71
  -5  -1   9   15.65    0.66
  -5   1   9   15.79    0.66
  -5   1   9   15.65    0.69
  -5   1   9   15.73    0.71
   3  -1  -9    8.55    0.41
  -3  -1   9    8.37    0.39
  -3  -1   9    8.97    0.38
  -3  -1   9    8.55    0.41
  -3   1   9    8.60    0.38
  -3   1   9    8.85    0.40
  -1  -1   9   26.78    1.21
  -1  -1   9   27.00    1.12
  -1  -1   9   27.11    1.16
  -1   1   9   27.32    1.17
  -1   1   9   27.44    1.13
   1  -1   9   19.44    0.81
   1  -1   9   18.61    0.83
   1  -1   9   19.79    0.88
   1   1   9   18.88    0.84
   1   1   9   18.93    0.81
   3  -1   9   15.64    0.77
   3  -1   9   17.57    0.73
   3  -1   9   16.34    0.71
   3   1   9   16.87    0.72
   3   1   9   16.48    0.74
   5  -1   9   17.19    0.74
   5  -1   9   16.39    0.71
   5  -1   9   16.38    0.78
   5   1   9   16.78    0.73
   5   1   9   16.51    0.75
   7  -1   9    2.24    0.14
   7  -1   9    1.99    0.13
   7  -1   9    2.41    0.16
   7   1   9    1.99    0.14
   7   1   9    2.24    0.15
   9  -1   9    2.51    0.15
   9  -1   9    2.43    0.18
   9   1   9    2.37    0.16
   9   1   9    2.40    0.17
  11  -1   9    5.29    0.32
  11   1   9    5.44    0.30
  11   1   9    5.85    0.30
  13  -1   9    1.73    0.17
 -13  -1  -9    1.81    0.22
  13   1   9    1.59    0.15
 -15  -1  -9    0.85    0.16
 -17  -1  -9    8.85    0.45
 -17  -1  -9    8.74    0.49
 -19  -1  -9    2.01    0.21
 -19  -1  -9    2.14    0.18
 -21  -1  -9    0.33    0.08
 -38  -2   9    0.03    0.03
 -38   2   9    0.02    0.02
 -36  -2   9   -0.01    0.04
 -36  -2   9    0.02    0.03
 -36  -2   9   -0.04    0.03
 -36   2   9   -0.01    0.04
 -36   2   9    0.02    0.03
 -34  -2   9    0.01    0.05
 -34  -2   9    0.04    0.04
 -34  -2   9    0.06    0.05
 -34   2   9    0.00    0.04
 -34   2   9    0.04    0.05
 -32  -2   9    0.15    0.06
 -32  -2   9    0.01    0.06
 -32  -2   9    0.14    0.05
 -32   2   9    0.12    0.05
 -32   2   9    0.13    0.07
 -30  -2   9    0.92    0.12
 -30  -2   9    1.03    0.10
 -30  -2   9    1.15    0.15
 -30   2   9    0.76    0.13
 -30   2   9    1.06    0.12
 -28  -2   9    0.62    0.08
 -28  -2   9    0.61    0.08
 -28  -2   9    1.01    0.14
 -28  -2   9    0.79    0.12
 -28   2   9    0.50    0.09
 -28   2   9    0.43    0.10
 -28   2   9    0.60    0.07
 -28   2   9    0.75    0.13
 -26  -2   9    1.45    0.13
 -26  -2   9    1.33    0.16
 -26  -2   9    1.37    0.12
 -26  -2   9    1.54    0.16
 -26   2   9    1.09    0.10
 -26   2   9    1.05    0.15
 -26   2   9    1.12    0.13
 -26   2   9    1.20    0.16
 -24  -2   9    1.77    0.18
 -24  -2   9    1.87    0.14
 -24  -2   9    1.77    0.18
 -24  -2   9    1.68    0.14
 -24   2   9    1.68    0.18
 -24   2   9    1.98    0.17
 -24   2   9    1.42    0.17
 -22  -2   9    0.48    0.10
 -22  -2   9    0.45    0.10
 -22  -2   9    0.78    0.13
 -20  -2   9    0.32    0.09
 -20  -2   9    0.41    0.09
 -20  -2   9    0.37    0.09
 -20   2   9    0.43    0.09
 -18  -2   9    2.95    0.20
 -18  -2   9    2.39    0.20
 -18  -2   9    2.83    0.21
 -18   2   9    2.76    0.19
 -16  -2   9    4.35    0.25
 -16  -2   9    3.88    0.24
 -16  -2   9    3.89    0.25
 -16   2   9    4.27    0.25
 -14  -2   9    9.00    0.46
 -14  -2   9    8.92    0.45
 -14  -2   9    8.73    0.43
 -14   2   9    9.10    0.45
 -14   2   9    9.29    0.44
 -12  -2   9    5.75    0.29
 -12  -2   9    5.45    0.29
  12  -2  -9    5.88    0.31
 -12  -2   9    5.28    0.30
 -12  -2   9    5.01    0.28
 -12   2   9    5.42    0.27
 -12   2   9    5.62    0.28
 -10  -2   9    2.81    0.18
  10  -2  -9    2.82    0.18
 -10  -2   9    2.81    0.17
 -10  -2   9    2.55    0.16
 -10  -2   9    2.82    0.16
 -10   2   9    3.02    0.15
 -10   2   9    2.81    0.16
  -8  -2   9   10.51    0.48
  -8  -2   9   10.54    0.50
  -8  -2   9   10.39    0.51
  -8  -2   9   10.93    0.49
   8  -2  -9   11.09    0.52
  -8   2   9   10.65    0.48
  -8   2   9   10.67    0.46
  -6  -2   9    9.90    0.45
  -6  -2   9    9.84    0.46
   6  -2  -9    9.99    0.48
  -6  -2   9    9.47    0.46
  -6  -2   9    9.06    0.43
  -6   2   9    9.63    0.44
  -6   2   9   10.33    0.43
  -4  -2   9    5.75    0.28
  -4  -2   9    5.98    0.28
  -4  -2   9    5.93    0.30
   4  -2  -9    5.50    0.30
  -4   2   9    5.87    0.27
  -4   2   9    6.14    0.29
  -2  -2   9    3.10    0.17
  -2  -2   9    3.09    0.18
   2  -2  -9    3.16    0.17
  -2  -2   9    2.89    0.16
  -2   2   9    3.06    0.17
  -2   2   9    2.99    0.16
   0  -2   9    0.54    0.07
   0  -2   9    0.45    0.06
   0  -2   9    0.40    0.05
   0   2   9    0.47    0.06
   0   2   9    0.52    0.06
   2  -2   9    2.24    0.13
   2  -2   9    2.26    0.15
   2  -2   9    2.26    0.13
   2   2   9    2.26    0.14
   2   2   9    2.24    0.14
   4  -2   9    1.72    0.11
   4  -2   9    1.62    0.12
   4   2   9    1.54    0.13
   4   2   9    1.69    0.12
   6  -2   9    0.38    0.07
   6   2   9    0.30    0.06
   6   2   9    0.22    0.06
   8  -2   9    0.61    0.09
   8   2   9    0.71    0.09
   8   2   9    0.57    0.09
  10  -2   9    8.95    0.45
  10   2   9    8.43    0.43
  10   2   9    8.57    0.44
  12  -2   9    1.41    0.14
 -12  -2  -9    1.05    0.18
  12   2   9    1.32    0.14
  14  -2   9    1.70    0.16
 -14  -2  -9    1.66    0.22
 -14  -2  -9    1.37    0.14
 -16  -2  -9    3.33    0.27
 -16  -2  -9    3.82    0.24
 -16  -2  -9    4.29    0.34
 -16  -2  -9    4.03    0.26
 -18  -2  -9    1.21    0.17
 -18  -2  -9    1.38    0.21
 -18  -2  -9    1.45    0.14
 -18  -2  -9    1.24    0.15
 -20  -2  -9    2.31    0.16
 -20  -2  -9    2.11    0.21
 -20  -2  -9    2.05    0.18
 -22  -2  -9    0.56    0.11
 -22  -2  -9    0.49    0.08
 -24  -2  -9    0.04    0.03
 -37  -3   9    0.02    0.03
 -37  -3   9    0.00    0.02
 -37   3   9    0.03    0.03
 -35  -3   9    0.19    0.04
 -35  -3   9    0.09    0.05
 -35  -3   9    0.19    0.05
 -35   3   9    0.18    0.04
 -33  -3   9    0.42    0.08
 -33  -3   9    0.31    0.07
 -33  -3   9    0.37    0.06
 -33   3   9    0.25    0.06
 -33   3   9    0.33    0.08
 -31  -3   9    1.20    0.14
 -31  -3   9    1.16    0.10
 -31  -3   9    1.34    0.14
 -31   3   9    1.25    0.12
 -31   3   9    1.28    0.15
 -29  -3   9    1.04    0.10
 -29  -3   9    1.08    0.09
 -29  -3   9    1.26    0.15
 -29  -3   9    1.11    0.13
 -29   3   9    1.10    0.12
 -29   3   9    1.04    0.14
 -27  -3   9    0.40    0.09
 -27  -3   9    0.38    0.09
 -27  -3   9    0.45    0.07
 -27  -3   9    0.51    0.08
 -27   3   9    0.33    0.08
 -27   3   9    0.41    0.06
 -27   3   9    0.32    0.10
 -25  -3   9    7.71    0.42
 -25  -3   9    8.01    0.37
 -25  -3   9    8.34    0.37
 -25  -3   9    8.17    0.44
 -25   3   9    7.04    0.43
 -25   3   9    7.65    0.39
 -23  -3   9    5.46    0.31
 -23  -3   9    5.06    0.26
 -23  -3   9    5.37    0.32
 -23   3   9    5.24    0.32
 -23   3   9    5.30    0.29
 -21  -3   9    0.72    0.12
 -21  -3   9    0.32    0.09
 -21  -3   9    0.38    0.10
  21  -3  -9    0.78    0.14
 -19  -3   9    3.88    0.27
 -19  -3   9    3.82    0.26
  19  -3  -9    4.27    0.28
  17  -3  -9    4.80    0.29
 -17  -3   9    4.46    0.28
 -17  -3   9    3.89    0.26
 -17  -3   9    4.31    0.27
 -15  -3   9    6.62    0.36
 -15  -3   9    7.44    0.38
 -15  -3   9    7.06    0.37
 -15  -3   9    6.19    0.35
 -13  -3   9   17.26    0.79
 -13  -3   9   16.96    0.82
  13  -3  -9   16.69    0.82
 -13  -3   9   18.14    0.81
 -13  -3   9   16.44    0.76
 -11  -3   9    8.58    0.41
  11  -3  -9    8.49    0.43
 -11  -3   9    8.02    0.42
 -11  -3   9    8.14    0.40
 -11  -3   9    7.21    0.38
  -9  -3   9    9.49    0.46
   9  -3  -9    8.74    0.47
  -9  -3   9    9.14    0.43
  -9  -3   9    8.89    0.44
  -9  -3   9    9.42    0.45
  -9   3   9    9.91    0.43
  -7  -3   9    2.03    0.14
  -7  -3   9    2.36    0.14
  -7  -3   9    2.55    0.15
  -7  -3   9    2.54    0.16
   7  -3  -9    2.22    0.16
  -7   3   9    2.22    0.13
  -7   3   9    2.24    0.13
  -5  -3   9    6.53    0.35
  -5  -3   9    7.19    0.35
  -5  -3   9    6.81    0.34
   5  -3  -9    6.54    0.35
  -5  -3   9    6.93    0.33
  -5   3   9    7.18    0.32
  -5   3   9    7.31    0.33
  -3  -3   9    4.21    0.23
  -3  -3   9    4.42    0.24
   3  -3  -9    4.14    0.24
  -3  -3   9    4.41    0.22
  -3   3   9    4.27    0.22
  -3   3   9    4.60    0.22
   1  -3  -9    6.58    0.32
  -1  -3   9    6.73    0.35
  -1  -3   9    6.74    0.31
  -1   3   9    6.83    0.32
  -1   3   9    6.96    0.33
   1  -3   9    0.20    0.05
   1   3   9    0.27    0.06
   1   3   9    0.17    0.05
   3  -3   9    5.41    0.30
   3   3   9    5.49    0.29
   3   3   9    5.68    0.28
   5  -3   9    2.99    0.19
   5   3   9    3.56    0.20
   5   3   9    2.97    0.19
   7  -3   9    2.31    0.16
   7   3   9    2.26    0.16
   7   3   9    2.38    0.17
   9  -3   9    2.80    0.19
   9   3   9    2.87    0.20
 -11  -3  -9    1.37    0.14
  11  -3   9    1.41    0.14
  11   3   9    1.26    0.14
 -13  -3  -9    2.21    0.16
 -13  -3  -9    2.26    0.26
 -13  -3  -9    1.82    0.21
 -13  -3  -9    2.00    0.17
 -15  -3  -9    2.99    0.27
 -15  -3  -9    2.65    0.23
 -15  -3  -9    3.54    0.30
 -15  -3  -9    3.03    0.21
 -15  -3  -9    3.10    0.20
 -17  -3  -9    2.54    0.18
 -17  -3  -9    3.10    0.30
 -17  -3  -9    2.66    0.19
 -17  -3  -9    2.18    0.20
 -17  -3  -9    2.83    0.26
 -19  -3  -9    0.70    0.10
 -19  -3  -9    0.74    0.12
 -19  -3  -9    0.86    0.10
 -19  -3  -9    1.03    0.15
 -21  -3  -9    0.10    0.05
 -21  -3  -9    0.17    0.06
 -21  -3  -9    0.16    0.07
 -21  -3  -9    0.17    0.09
 -23  -3  -9    0.08    0.07
 -23  -3  -9    0.04    0.03
 -25  -3  -9    0.09    0.05
 -36   4   9    0.05    0.03
 -34  -4   9    0.06    0.04
 -34  -4   9    0.06    0.03
 -34  -4   9    0.00    0.04
  34   4  -9   -0.02    0.05
 -34   4   9    0.00    0.03
 -32  -4   9    0.17    0.04
 -32  -4   9    0.15    0.06
 -32  -4   9    0.07    0.05
 -32   4   9    0.06    0.05
  32   4  -9    0.11    0.07
 -30  -4   9    0.21    0.07
 -30  -4   9    0.18    0.05
 -30  -4   9    0.15    0.06
 -30   4   9    0.11    0.06
 -28  -4   9    0.76    0.08
 -28  -4   9    0.69    0.10
 -28  -4   9    0.72    0.12
 -28  -4   9    0.65    0.08
 -28  -4   9    0.89    0.12
 -28   4   9    0.47    0.09
 -28   4   9    0.68    0.12
 -26  -4   9   -0.03    0.04
 -26  -4   9    0.06    0.06
 -26  -4   9    0.00    0.05
 -26  -4   9    0.00    0.04
 -26  -4   9   -0.03    0.07
 -26   4   9    0.00    0.06
 -26   4   9    0.05    0.07
 -24  -4   9    0.25    0.08
 -24  -4   9    0.44    0.07
 -24  -4   9    0.38    0.10
 -24  -4   9    0.17    0.06
 -24   4   9    0.36    0.09
 -24   4   9    0.20    0.09
 -22  -4   9    1.90    0.14
 -22  -4   9    2.16    0.20
 -22  -4   9    2.35    0.18
 -22  -4   9    2.39    0.21
 -22   4   9    2.16    0.21
 -22   4   9    2.18    0.19
 -20  -4   9    0.21    0.07
 -20   4   9    0.37    0.10
 -20   4   9    0.31    0.08
 -18  -4   9    0.22    0.08
 -18  -4   9    0.21    0.08
 -16  -4   9    0.64    0.12
 -16  -4   9    0.73    0.12
 -16  -4   9    0.59    0.10
 -14  -4   9   13.06    0.61
 -14  -4   9   12.98    0.66
 -14  -4   9   13.37    0.65
 -14  -4   9   12.64    0.63
 -12  -4   9    3.08    0.20
 -12  -4   9    3.23    0.22
  12  -4  -9    2.84    0.21
 -12  -4   9    3.10    0.20
 -12  -4   9    2.81    0.19
 -10  -4   9    0.76    0.10
 -10  -4   9    0.85    0.10
 -10  -4   9    0.77    0.11
  10  -4  -9    0.79    0.11
 -10  -4   9    0.92    0.11
  -8  -4   9    4.78    0.28
   8  -4  -9    5.00    0.29
  -8  -4   9    5.01    0.28
  -8  -4   9    5.11    0.26
  -8  -4   9    4.54    0.27
  -6  -4   9    1.30    0.12
   6  -4  -9    1.25    0.13
  -6  -4   9    1.31    0.13
  -6  -4   9    1.10    0.11
  -4  -4   9    1.76    0.15
  -4  -4   9    1.80    0.13
   4  -4  -9    1.48    0.13
  -4   4   9    1.69    0.12
  -2  -4   9    0.64    0.09
   2  -4  -9    0.59    0.08
  -2   4   9    0.63    0.08
  -2   4   9    0.73    0.08
   0  -4   9    1.93    0.16
   0   4   9    1.74    0.13
   0   4   9    1.95    0.13
   2  -4   9    0.80    0.10
   2   4   9    0.82    0.10
   2   4   9    1.06    0.11
   4  -4   9    1.25    0.13
   4   4   9    1.69    0.14
   4   4   9    1.55    0.14
   6  -4   9    2.00    0.16
   6   4   9    2.33    0.17
   6   4   9    2.08    0.17
  -8  -4  -9    1.45    0.14
   8  -4   9    1.51    0.14
   8   4   9    2.16    0.18
  10  -4   9    0.66    0.10
 -10  -4  -9    0.62    0.10
 -10  -4  -9    0.85    0.11
 -10  -4  -9    0.65    0.09
 -12  -4  -9    0.83    0.11
 -12  -4  -9    0.63    0.13
 -12  -4  -9    0.80    0.11
 -12  -4  -9    0.90    0.09
 -12  -4  -9    0.80    0.13
 -12  -4  -9    0.91    0.18
 -12   4  -9    0.82    0.12
 -14  -4  -9    0.47    0.09
 -14  -4  -9    0.58    0.13
 -14  -4  -9    0.60    0.11
 -14  -4  -9    0.78    0.16
 -14  -4  -9    0.71    0.10
 -16  -4  -9    5.68    0.41
 -16  -4  -9    5.23    0.30
 -16  -4  -9    5.23    0.32
 -16  -4  -9    4.93    0.28
 -18  -4  -9    2.35    0.17
 -18  -4  -9    3.12    0.27
 -18  -4  -9    2.48    0.21
 -18  -4  -9    2.46    0.18
 -20  -4  -9    0.50    0.07
 -20  -4  -9    0.75    0.13
 -20  -4  -9    0.68    0.10
 -20  -4  -9    0.58    0.09
 -22  -4  -9    0.44    0.10
 -22  -4  -9    0.30    0.06
 -24  -4  -9    0.29    0.08
 -24  -4  -9    0.21    0.04
 -26  -4  -9    0.01    0.02
 -33  -5   9    0.13    0.03
 -33  -5   9    0.13    0.04
 -33  -5   9    0.18    0.05
  33   5  -9    0.21    0.07
 -33   5   9    0.20    0.05
 -31  -5   9    0.58    0.08
 -31  -5   9    0.74    0.08
 -31  -5   9    0.49    0.06
 -31  -5   9    0.55    0.09
  31   5  -9    0.56    0.11
 -31   5   9    0.46    0.07
 -29  -5   9    0.68    0.11
 -29  -5   9    0.78    0.10
 -29  -5   9    0.54    0.07
 -29  -5   9    0.60    0.06
  29   5  -9    0.57    0.12
 -29   5   9    0.77    0.10
 -27  -5   9    0.41    0.08
 -27  -5   9    0.39    0.06
 -27  -5   9    0.42    0.10
 -27  -5   9    0.36    0.06
 -27   5   9    0.31    0.08
  27   5  -9    0.51    0.12
 -25  -5   9    0.43    0.09
 -25  -5   9    0.40    0.06
 -25  -5   9    0.37    0.10
 -25  -5   9    0.32    0.07
  25   5  -9    0.51    0.12
 -25   5   9    0.39    0.09
 -23  -5   9    4.10    0.27
 -23  -5   9    3.93    0.23
 -23  -5   9    4.00    0.21
 -23   5   9    4.08    0.25
  23   5  -9    4.06    0.28
 -21  -5   9    2.04    0.17
 -21  -5   9    1.82    0.18
  21   5  -9    1.57    0.21
 -21   5   9    2.03    0.18
 -19  -5   9    1.88    0.18
  19   5  -9    1.73    0.21
 -19   5   9    1.97    0.13
 -19   5   9    1.66    0.16
 -19   5   9    2.33    0.20
 -17  -5   9    0.88    0.12
 -17   5   9    1.03    0.13
  17   5  -9    0.90    0.16
 -17   5   9    1.05    0.13
 -17   5   9    0.87    0.10
 -15  -5   9    0.98    0.14
 -15  -5   9    1.51    0.17
 -15  -5   9    1.74    0.19
 -13  -5   9    0.95    0.13
 -13  -5   9    0.80    0.12
 -11  -5   9    0.27    0.08
  11  -5  -9    0.16    0.08
 -11  -5   9    0.35    0.08
   9  -5  -9    0.70    0.11
  -9  -5   9    0.71    0.11
  -9  -5   9    1.13    0.13
  -7  -5   9    1.87    0.16
  -7  -5   9    1.61    0.16
   7  -5  -9    1.38    0.14
   5  -5  -9    0.96    0.12
  -5  -5   9    1.43    0.14
  -5  -5   9    0.96    0.12
  -3  -5   9    1.22    0.13
  -3  -5   9    0.83    0.11
   3  -5  -9    1.04    0.11
  -1  -5   9    0.24    0.07
   1  -5   9    0.87    0.11
   3  -5   9    0.00    0.05
   3   5   9   -0.04    0.05
   5  -5   9    0.84    0.11
   5   5   9    0.66    0.10
  -7  -5  -9    0.89    0.12
  -7  -5  -9    0.74    0.10
  -7   5  -9    1.03    0.12
  -9  -5  -9    1.89    0.16
  -9  -5  -9    1.96    0.17
  -9  -5  -9    1.97    0.17
  -9  -5  -9    1.65    0.17
  -9  -5  -9    2.18    0.25
  -9  -5  -9    2.21    0.22
  -9   5  -9    2.21    0.18
  -9   5  -9    1.78    0.14
 -11  -5  -9    6.11    0.32
 -11  -5  -9    6.88    0.36
 -11  -5  -9    6.09    0.40
 -11  -5  -9    6.69    0.46
 -11  -5  -9    6.06    0.36
 -11  -5  -9    7.06    0.35
 -11   5  -9    6.75    0.36
 -13  -5  -9    4.58    0.23
 -13  -5  -9    4.86    0.28
 -13  -5  -9    5.25    0.29
 -13  -5  -9    4.78    0.30
 -13  -5  -9    5.15    0.38
 -13  -5  -9    4.57    0.33
 -15  -5  -9    1.41    0.14
 -15  -5  -9    1.01    0.14
 -15  -5  -9    1.16    0.13
 -15  -5  -9    1.05    0.16
 -17  -5  -9    0.63    0.13
 -17  -5  -9    0.65    0.09
 -17  -5  -9    0.55    0.10
 -19  -5  -9    0.35    0.08
 -19  -5  -9    0.19    0.05
 -19  -5  -9    0.32    0.10
 -21  -5  -9    0.05    0.03
 -21  -5  -9    0.30    0.05
 -21  -5  -9    0.28    0.09
 -23  -5  -9    0.03    0.04
 -23  -5  -9    0.06    0.06
 -23  -5  -9    0.08    0.04
 -25  -5  -9    0.01    0.02
 -32  -6   9   -0.01    0.04
 -32   6   9    0.10    0.03
 -30  -6   9    0.14    0.05
 -30  -6   9    0.19    0.04
  30   6  -9    0.14    0.07
 -30   6   9    0.21    0.05
 -28  -6   9   -0.02    0.03
 -28  -6   9    0.08    0.03
  28   6  -9    0.02    0.06
 -28   6   9    0.04    0.05
 -26  -6   9    0.48    0.06
 -26  -6   9    0.34    0.07
 -26  -6   9    0.27    0.08
 -26   6   9    0.43    0.08
  26   6  -9    0.34    0.11
 -24  -6   9    0.14    0.05
 -24  -6   9    0.14    0.07
 -24  -6   9    0.06    0.05
 -24   6   9    0.15    0.07
  24   6  -9    0.15    0.09
 -22  -6   9    0.12    0.06
 -22  -6   9    0.23    0.06
 -22  -6   9    0.10    0.07
 -22   6   9    0.19    0.07
  22   6  -9    0.28    0.10
 -20  -6   9    0.20    0.08
 -20  -6   9    0.22    0.07
  20   6  -9    0.17    0.10
 -20   6   9    0.22    0.08
 -18  -6   9    0.50    0.10
 -18   6   9    0.40    0.09
  18   6  -9    0.31    0.11
 -18   6   9    0.41    0.07
 -16  -6   9    1.35    0.15
  16   6  -9    1.48    0.20
 -16   6   9    1.29    0.13
 -16   6   9    1.40    0.15
 -14  -6   9    1.40    0.15
 -14  -6   9    1.28    0.15
 -14   6   9    1.06    0.13
 -14   6   9    1.12    0.13
  14   6  -9    0.97    0.17
 -12  -6   9    0.07    0.07
 -12  -6   9    0.04    0.07
 -12   6   9    0.20    0.08
 -12   6   9    0.02    0.07
 -12   6   9    0.06    0.06
  12   6  -9    0.18    0.09
 -10   6   9    0.24    0.08
  10   6  -9    0.20    0.10
 -10   6   9    0.43    0.08
   8   6  -9    2.31    0.27
  -6  -6   9    1.13    0.15
   6   6  -9    0.99    0.17
  -4  -6   9    0.57    0.11
   4   6  -9    0.38    0.13
   2  -6  -9    0.52    0.08
   2   6  -9    0.63    0.15
   2   6  -9    0.67    0.11
   0  -6  -9    1.26    0.13
   0   6  -9    1.28    0.14
   0   6  -9    1.36    0.17
   0   6  -9    1.14    0.20
  -2  -6  -9    0.55    0.12
  -2  -6  -9    0.41    0.08
  -2   6  -9    0.43    0.08
  -2   6  -9    0.25    0.10
  -4  -6  -9    0.11    0.08
  -4  -6  -9    0.17    0.06
  -4  -6  -9    0.12    0.09
  -4   6  -9    0.12    0.09
  -6  -6  -9    3.53    0.29
  -6  -6  -9    2.92    0.20
  -6  -6  -9    3.14    0.23
  -6  -6  -9    2.92    0.27
  -6   6  -9    3.28    0.21
  -8  -6  -9    1.36    0.14
  -8  -6  -9    1.42    0.20
  -8  -6  -9    1.70    0.15
  -8  -6  -9    1.28    0.18
  -8   6  -9    1.30    0.13
 -10  -6  -9    0.25    0.07
 -10  -6  -9    0.21    0.09
 -10  -6  -9    0.15    0.06
 -10  -6  -9    0.17    0.11
 -10  -6  -9    0.02    0.08
 -12  -6  -9    0.17    0.08
 -12  -6  -9    0.11    0.05
 -12  -6  -9    0.15    0.06
 -12  -6  -9    0.08    0.08
 -14  -6  -9    0.52    0.08
 -14  -6  -9    0.70    0.11
 -14  -6  -9    0.63    0.13
 -16  -6  -9    0.31    0.08
 -16  -6  -9    0.54    0.08
 -16  -6  -9    0.59    0.12
 -18  -6  -9    0.17    0.05
 -18  -6  -9    0.14    0.06
 -18  -6  -9    0.13    0.07
 -20  -6  -9    0.03    0.05
 -20  -6  -9    0.00    0.03
 -20  -6  -9    0.03    0.06
 -22  -6  -9    0.06    0.05
 -22  -6  -9    0.00    0.03
 -22  -6  -9   -0.01    0.03
 -29  -7   9    0.15    0.05
 -29   7   9    0.11    0.04
 -27  -7   9   -0.01    0.03
 -27  -7   9    0.00    0.03
 -27  -7   9    0.01    0.04
  27   7  -9   -0.05    0.05
 -27   7   9    0.03    0.04
 -25  -7   9    0.15    0.05
 -25  -7   9    0.11    0.04
 -25  -7   9    0.13    0.06
  25   7  -9    0.14    0.08
 -25   7   9    0.14    0.06
 -23  -7   9    0.41    0.09
 -23  -7   9    0.39    0.07
 -23  -7   9    0.50    0.07
 -23   7   9    0.59    0.09
  23   7  -9    0.57    0.12
 -21  -7   9    0.09    0.06
 -21  -7   9    0.06    0.06
 -21   7   9    0.07    0.06
  21   7  -9    0.09    0.08
 -19  -7   9    0.35    0.09
 -19   7   9    0.45    0.09
  19   7  -9    0.54    0.13
 -17  -7   9    0.53    0.10
 -17  -7   9    0.55    0.11
  17   7  -9    0.29    0.11
 -17   7   9    0.64    0.08
 -17   7   9    0.60    0.10
 -15  -7   9   -0.04    0.06
 -15  -7   9    0.17    0.08
  15   7  -9    0.07    0.08
 -15   7   9    0.04    0.06
 -15   7   9    0.08    0.06
 -13  -7   9    0.04    0.07
 -13  -7   9    0.02    0.06
 -13   7   9    0.20    0.07
  13   7  -9    0.03    0.08
 -13   7   9    0.04    0.06
 -11  -7   9    0.48    0.09
 -11  -7   9    0.45    0.10
  11   7  -9    0.41    0.13
 -11   7   9    0.41    0.09
 -11   7   9    0.39    0.09
  -9  -7   9    0.08    0.07
  -9  -7   9    0.03    0.06
   9   7  -9    0.05    0.08
  -9   7   9    0.11    0.07
  -7  -7   9    0.63    0.11
   7   7  -9    0.43    0.13
  -7   7   9    0.48    0.10
  -7   7   9    0.48    0.08
   7   7  -9    0.57    0.13
  -5  -7   9    0.96    0.14
  -5   7   9    0.62    0.11
   5   7  -9    0.61    0.15
  -5   7   9    0.69    0.10
   5   7  -9    0.72    0.13
  -3  -7   9    1.22    0.15
   3   7  -9    0.92    0.13
  -3   7   9    0.83    0.11
   3   7  -9    0.54    0.15
  -3   7   9    0.80    0.12
   1  -7  -9    0.74    0.10
   1   7  -9    0.55    0.15
   1   7  -9    0.66    0.11
  -1   7   9    0.75    0.10
   1   7  -9    0.62    0.13
  -1  -7  -9    0.57    0.09
  -1   7  -9    0.67    0.09
  -1   7  -9    0.55    0.12
  -3  -7  -9    0.12    0.08
  -3  -7  -9   -0.01    0.08
  -3  -7  -9    0.03    0.05
  -3   7  -9    0.01    0.08
  -5  -7  -9    0.05    0.05
  -5  -7  -9    0.01    0.08
  -5  -7  -9    0.40    0.09
  -5   7  -9    0.06    0.07
  -7  -7  -9    0.33    0.11
  -7  -7  -9    0.57    0.09
  -7  -7  -9    0.55    0.10
  -7   7  -9    0.56    0.09
  -9  -7  -9    1.48    0.13
  -9  -7  -9    1.14    0.16
  -9  -7  -9    1.33    0.13
  -9   7  -9    1.47    0.10
 -11  -7  -9    1.72    0.14
 -11  -7  -9    1.29    0.17
 -11  -7  -9    1.66    0.13
 -11  -7  -9    1.82    0.16
 -13  -7  -9    0.34    0.06
 -13  -7  -9    0.32    0.08
 -13  -7  -9    0.14    0.08
 -15  -7  -9    0.21    0.08
 -15  -7  -9    0.25    0.05
 -15  -7  -9    0.32    0.07
 -17  -7  -9    0.12    0.06
 -17  -7  -9    0.02    0.03
 -17  -7  -9    0.03    0.05
 -19  -7  -9    0.02    0.03
 -19  -7  -9    0.04    0.04
 -19  -7  -9    0.06    0.05
 -26  -8   9    0.00    0.04
 -26   8   9    0.10    0.04
 -24  -8   9    0.02    0.03
[truncated: 273,331 more chars]
